# Supplementary material for: Intratumoral Distribution of Lactate and the Monocarboxylate Transporters 1 and 4 in Human Glioblastoma Multiforme and Their Relationships to Tumor Progression-Associated Markers
Source: MDPI journal article supplement (doi:10.3390/ijms21176254), 2020-08-29
Supplement: s1 [file s1]

correlation analysis with clinical data

qPCR (15 patients enrolled)

yellow fields indicate statistically significant values

using the n-fold values:

|                                                       | MCT1   | MCT4   | vimentin | GFAP   | β-catenin | KLF4   | OCT4   | Sox2   | EPHA5  | H2BK   | IGFBP5 |
|-------------------------------------------------------|--------|--------|----------|--------|-----------|--------|--------|--------|--------|--------|--------|
| age                                                   | -0.146 | 0.233  | 0.342    | 0.568  | 0.240     | 0.452  | 0.397  | -0.466 | -0.474 | 0.426  | 0.417  |
| gender (male: 1; female: 2)                           | 0.012  | -0.067 | -0.237   | -0.304 | -0.354    | -0.026 | -0.670 | 0.183  | 0.255  | -0.175 | -0.037 |
| symptoms before diagnosis                             | -0.151 | -0.202 | -0.294   | 0.139  | 0.078     | 0.422  | -0.086 | -0.136 | 0.126  | 0.162  | -0.056 |
| primary versus recurrence (primary: 1; recurrence: 2) | 0.414  | 0.564  | 0.425    | 0.154  | 0.033     | -0.157 | 0.173  | -0.174 | -0.141 | 0.024  | 0.332  |
| time to relapse                                       | 0.263  | 0.536  | 0.373    | 0.030  | -0.989    | 0.444  | 0.535  | -0.959 | 0.041  | -0.585 | 0.408  |
| MGMT-status (unmethylated: 1; methylated: 2)          | 0.008  | 0.025  | 0.020    | 0.056  | -0.133    | 0.135  | -0.526 | 0.090  | 0.123  | -0.333 | 0.345  |
| 1p19q-status (no codeletion:1; codeletion: 2)         | -0.257 | -0.296 | -0.031   | -0.233 | -0.262    | -0.228 | 0.034  | -0.135 | -0.171 | 0.471  | -0.200 |

using the ΔCr values:

|                                                       |               | MCT1   | MCT4   | vimentin | GFAP   | β-catenin | KLF4   | OCT4   | Sox2   | EPHA5  | H2BK   | IGFBP5 |
|-------------------------------------------------------|---------------|--------|--------|----------|--------|-----------|--------|--------|--------|--------|--------|--------|
| age                                                   | center + edge | -0.118 | 0.319  | -0.087   | -0.035 | 0.012     | 0.120  | -0.074 | -0.090 | 0.055  | 0.087  | 0.084  |
|                                                       | center        | 0.008  | 0.441  | 0.075    | -0.176 | 0.033     | 0.124  | -0.269 | -0.027 | 0.296  | -0.432 | 0.193  |
|                                                       | edge          | -0.236 | 0.167  | -0.221   | 0.030  | 0.004     | 0.153  | 0.047  | -0.172 | -0.227 | 0.786  | 0.068  |
| gender (male: 1; female: 2)                           | center + edge | 0.070  | 0.020  | 0.085    | -0.212 | -0.062    | -0.259 | -0.061 | -0.231 | -0.068 | 0.260  | 0.138  |
|                                                       | center        | 0.068  | -0.212 | 0.058    | -0.250 | -0.014    | -0.393 | 0.189  | -0.197 | -0.178 | 0.548  | -0.203 |
|                                                       | edge          | 0.075  | 0.353  | 0.108    | -0.227 | -0.095    | -0.294 | -0.228 | -0.278 | 0.058  | -0.115 | 0.277  |
| symptoms before diagnosis                             | center + edge | -0.217 | -0.106 | -0.015   | 0.081  | 0.008     | 0.010  | 0.196  | -0.095 | -0.241 | -0.043 | 0.250  |
|                                                       | center        | -0.171 | -0.081 | 0.163    | -0.069 | -0.139    | -0.050 | 0.249  | -0.060 | -0.187 | -0.140 | 0.212  |
|                                                       | edge          | -0.270 | -0.148 | -0.160   | 0.169  | 0.081     | 0.029  | 0.176  | -0.142 | -0.308 | 0.085  | 0.318  |
| primary versus recurrence (primary: 1; recurrence: 2) | center + edge | -0.045 | 0.015  | -0.160   | -0.162 | -0.136    | -0.161 | 0.379  | -0.122 | -0.310 | 0.198  | -0.016 |
|                                                       | center        | -0.196 | -0.259 | -0.340   | -0.177 | -0.170    | 0.031  | 0.314  | -0.109 | -0.256 | 0.110  | -0.144 |
|                                                       | edge          | 0.084  | 0.409  | -0.015   | -0.180 | -0.140    | -0.260 | 0.450  | -0.141 | -0.379 | 0.324  | 0.021  |
| time to relapse                                       | center + edge | 0.913  | -0.110 | 0.097    | -0.742 | 0.070     | -0.906 | 0.868  | -0.442 | 0.553  | 0.318  | 0.189  |
|                                                       | center        | 0.842  | -0.899 | -0.748   | -0.960 | 0.266     | -0.966 | 0.912  | -0.363 | 0.618  | 0.811  | -0.990 |
|                                                       | edge          | 0.988  | 0.176  | 0.364    | -0.912 | -0.095    | -0.911 | 0.963  | -0.539 | 0.498  | 0.037  | 0.529  |
| MGMT-status (unmethylated: 1; methylated: 2)          | center + edge | 0.341  | -0.035 | 0.363    | 0.229  | 0.477     | -0.103 | 0.216  | 0.308  | -0.113 | 0.267  | 0.371  |
|                                                       | center        | 0.385  | -0.026 | 0.520    | 0.304  | 0.758     | -0.315 | 0.335  | 0.369  | -0.221 | 0.341  | 0.388  |
|                                                       | edge          | 0.352  | 0.026  | 0.321    | 0.251  | 0.476     | -0.068 | 0.122  | 0.286  | 0.028  | 0.127  | 0.479  |
| 1p19q-status (no codeletion:1; codeletion: 2)         | center + edge | 0.151  | 0.376  | 0.117    | -0.341 | -0.300    | 0.103  | -0.053 | -0.280 | 0.515  | -0.205 | -0.254 |
|                                                       | center        | 0.298  | 0.658  | 0.226    | -0.257 | -0.246    | 0.316  | -0.083 | -0.280 | 0.684  | -0.342 | -0.330 |
|                                                       | edge          | 0.041  | 0.182  | 0.038    | -0.441 | -0.373    | 0.080  | -0.038 | -0.285 | 0.324  | -0.036 | -0.297 |

|         | OCT4 / gender | β-catenin / time to relapse | Sox2 / time to relapse |
|---------|---------------|-----------------------------|------------------------|
| p-value | -3.251        | -24.311                     | -12.174                |
| t-value | 0.006         | 0.000                       | 0.000                  |

|         | MCT1 / time to relapse |        |        | MCT4 / time to relapse |  | vimentin | GFAP          |         |        |
|---------|------------------------|--------|--------|------------------------|--|----------|---------------|---------|--------|
|         | center + edge          | center | edge   | center                 |  | center   | center + edge | center  | edge   |
| p-value | 11.877                 | 5.630  | 22.891 | -7.385                 |  | -4.058   | -5.848        | -12.307 | -8.004 |
| t-value | 0.000                  | 0.000  | 0.000  | 0.000                  |  | 0.001    | 0.000         | 0.000   | 0.000  |

|         | KLF4 / time to relapse |         |        | OCT4 / time to relapse |        |        | EPHA5 / time to relapse | H2BK / time to relapse |
|---------|------------------------|---------|--------|------------------------|--------|--------|-------------------------|------------------------|
|         | center + edge          | center  | edge   | center + edge          | center | edge   | center                  | center                 |
| p-value | -11.339                | -13.412 | -7.989 | 9.268                  | 8.034  | 12.892 | 2.837                   | 4.995                  |
| t-value | 0.000                  | 0.000   | 0.000  | 0.011                  | 0.000  | 0.000  | 0.014                   | 0.000                  |

|         | relapse<br>center | MGMT<br>center | 1p19q<br>center | EPHA5 / 1p19q<br>center |
|---------|-------------------|----------------|-----------------|-------------------------|
| p-value | -25.575           | 4.185          | 3.150           | 3.378                   |
| t-value | 0.000             | 0.001          | 0.008           | 0.005                   |
