# Supplementary material for: Intratumoral Distribution of Lactate and the Monocarboxylate Transporters 1 and 4 in Human Glioblastoma Multiforme and Their Relationships to Tumor Progression-Associated Markers
Source: MDPI journal article supplement (doi:10.3390/ijms21176254), 2020-08-29
Supplement: s1 [file s1]

# P11 - tumor voxel 12;12

Row#12 Col#12 MR Hirn (2018.11.14 13:31:04) Subject 13 8.00e-01 mL, TE/TR/NS=288/1500/1 (s2DSI\_TE288 TR1500)

Data of: Sektion Biomedizinische Bildgebung, Christian-Albrechts-Universitaet zu Kiel

LCModel (Version 6.3-1J) Copyright: S.W. Provencher.

Ref.: Magn. Reson. Med. 30:672-679 (1993).

19-June-2019 17:44

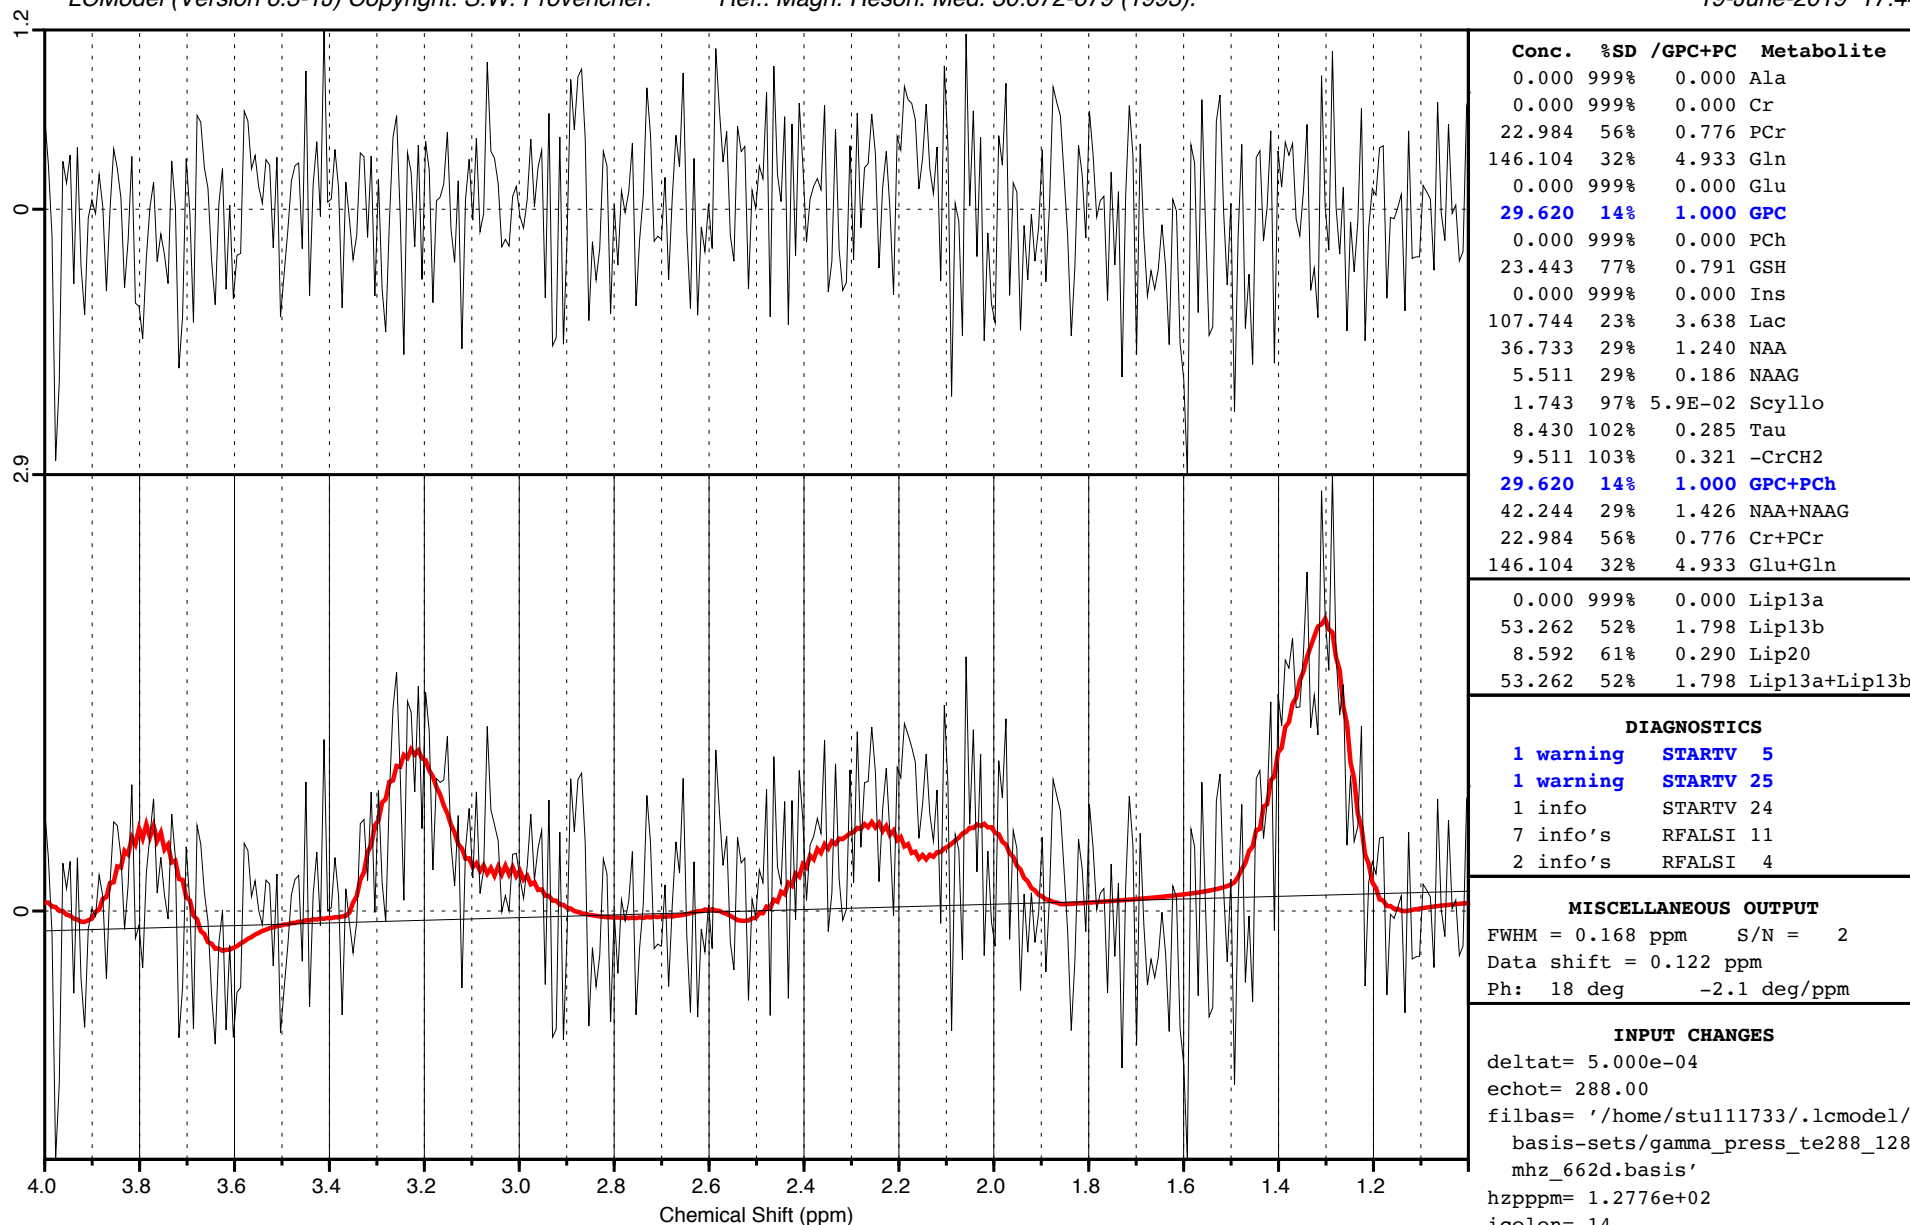

| Conc.   | %SD  | /GPC+PC | Metabolite |
|---------|------|---------|------------|
| 0.000   | 999% | 0.000   | Ala        |
| 0.000   | 999% | 0.000   | Cr         |
| 22.984  | 56%  | 0.776   | PCr        |
| 146.104 | 32%  | 4.933   | Gln        |
| 0.000   | 999% | 0.000   | Glu        |
| 29.620  | 14%  | 1.000   | GPC        |
| 0.000   | 999% | 0.000   | PCh        |
| 23.443  | 77%  | 0.791   | GSH        |
| 0.000   | 999% | 0.000   | Ins        |
| 107.744 | 23%  | 3.638   | Lac        |
| 36.733  | 29%  | 1.240   | NAA        |
| 5.511   | 29%  | 0.186   | NAAG       |
| 1.743   | 97%  | 5.9E-02 | Scyllo     |
| 8.430   | 102% | 0.285   | Tau        |
| 9.511   | 103% | 0.321   | -CrCH2     |
| 29.620  | 14%  | 1.000   | GPC+PCh    |
| 42.244  | 29%  | 1.426   | NAA+NAAG   |
| 22.984  | 56%  | 0.776   | Cr+PCr     |
| 146.104 | 32%  | 4.933   | Glu+Gln    |

|        |      |       |               |
|--------|------|-------|---------------|
| 0.000  | 999% | 0.000 | Lip13a        |
| 53.262 | 52%  | 1.798 | Lip13b        |
| 8.592  | 61%  | 0.290 | Lip20         |
| 53.262 | 52%  | 1.798 | Lip13a+Lip13b |

## DIAGNOSTICS

1 warning STARTV 5  
1 warning STARTV 25  
1 info STARTV 24  
7 info's RFALSI 11  
2 info's RFALSI 4

## MISCELLANEOUS OUTPUT

FWHM = 0.168 ppm S/N = 2  
Data shift = 0.122 ppm  
Ph: 18 deg -2.1 deg/ppm

## INPUT CHANGES

deltat= 5.000e-04  
echot= 288.00  
filbas= '/home/stu111733/.lcmodel/  
basis-sets/gamma\_press\_te288\_128  
mh2\_662d.basis'  
hzpppm= 1.2776e+02  
icolen= 14  
icolst= 10

Row#12 Col#12 MR Hirn (2018.11.14 13:31:04) Subject 13 8.00e-01 mL, TE/TR/NS=288/1500/1 (s2DSI\_TE288 TR1500)

Data of: Sektion Biomedizinische Bildgebung, Christian-Albrechts-Universitaet zu Kiel

LCModel (Version 6.3-1J) Copyright: S.W. Provencher.

*Ref.: Magn. Reson. Med. 30:672-679 (1993).*

19-June-2019 17:44

|                                                                                                                                                                                                                                                                                                                                                                                                                                                                                                                                                                                                                                                                                                                                                                                                                                                                                                                                                                                                                                                                                                                                                                                                                                                                                                                                          |                      |         |            |            |                          |        |       |     |                        |        |       |    |                                                 |        |       |     |                                   |        |       |     |                    |        |       |     |            |     |       |     |       |      |       |     |        |     |       |     |       |      |       |     |         |     |       |     |        |     |       |     |       |     |       |      |       |     |         |        |       |      |       |     |       |      |       |        |        |     |       |         |        |     |       |          |        |     |       |        |         |     |       |         |                                                                                                                                                                                                                                                                                                                                                                                                                                                                                                                                                                                                      |            |            |           |           |        |           |            |            |           |              |             |            |                                          |          |       |                 |                                                         |     |
|------------------------------------------------------------------------------------------------------------------------------------------------------------------------------------------------------------------------------------------------------------------------------------------------------------------------------------------------------------------------------------------------------------------------------------------------------------------------------------------------------------------------------------------------------------------------------------------------------------------------------------------------------------------------------------------------------------------------------------------------------------------------------------------------------------------------------------------------------------------------------------------------------------------------------------------------------------------------------------------------------------------------------------------------------------------------------------------------------------------------------------------------------------------------------------------------------------------------------------------------------------------------------------------------------------------------------------------|----------------------|---------|------------|------------|--------------------------|--------|-------|-----|------------------------|--------|-------|----|-------------------------------------------------|--------|-------|-----|-----------------------------------|--------|-------|-----|--------------------|--------|-------|-----|------------|-----|-------|-----|-------|------|-------|-----|--------|-----|-------|-----|-------|------|-------|-----|---------|-----|-------|-----|--------|-----|-------|-----|-------|-----|-------|------|-------|-----|---------|--------|-------|------|-------|-----|-------|------|-------|--------|--------|-----|-------|---------|--------|-----|-------|----------|--------|-----|-------|--------|---------|-----|-------|---------|------------------------------------------------------------------------------------------------------------------------------------------------------------------------------------------------------------------------------------------------------------------------------------------------------------------------------------------------------------------------------------------------------------------------------------------------------------------------------------------------------------------------------------------------------------------------------------------------------|------------|------------|-----------|-----------|--------|-----------|------------|------------|-----------|--------------|-------------|------------|------------------------------------------|----------|-------|-----------------|---------------------------------------------------------|-----|
| <table><tr><td>Conc.</td><td>%SD</td><td>/GPC+PC</td><td>Metabolite</td></tr><tr><td>0.000</td><td>999%</td><td>0.000</td><td>Ala</td></tr><tr><td>0.000</td><td>999%</td><td>0.000</td><td>Cr</td></tr><tr><td>22.984</td><td>56%</td><td>0.776</td><td>PCr</td></tr><tr><td>146.104</td><td>32%</td><td>4.933</td><td>Gln</td></tr><tr><td>0.000</td><td>999%</td><td>0.000</td><td>Glu</td></tr><tr><td>29.620</td><td>14%</td><td>1.000</td><td>GPC</td></tr><tr><td>0.000</td><td>999%</td><td>0.000</td><td>PCh</td></tr><tr><td>23.443</td><td>77%</td><td>0.791</td><td>GSH</td></tr><tr><td>0.000</td><td>999%</td><td>0.000</td><td>Ins</td></tr><tr><td>107.744</td><td>23%</td><td>3.638</td><td>Lac</td></tr><tr><td>36.733</td><td>29%</td><td>1.240</td><td>NAA</td></tr><tr><td>5.511</td><td>29%</td><td>0.186</td><td>NAAG</td></tr><tr><td>1.743</td><td>97%</td><td>5.9E-02</td><td>Scyllo</td></tr><tr><td>8.430</td><td>102%</td><td>0.285</td><td>Tau</td></tr><tr><td>9.511</td><td>103%</td><td>0.321</td><td>-CrCH2</td></tr><tr><td>29.620</td><td>14%</td><td>1.000</td><td>GPC+PCh</td></tr><tr><td>42.244</td><td>29%</td><td>1.426</td><td>NAA+NAAG</td></tr><tr><td>22.984</td><td>56%</td><td>0.776</td><td>Cr+PCr</td></tr><tr><td>146.104</td><td>32%</td><td>4.933</td><td>Glu+Gln</td></tr></table> | Conc.                | %SD     | /GPC+PC    | Metabolite | 0.000                    | 999%   | 0.000 | Ala | 0.000                  | 999%   | 0.000 | Cr | 22.984                                          | 56%    | 0.776 | PCr | 146.104                           | 32%    | 4.933 | Gln | 0.000              | 999%   | 0.000 | Glu | 29.620     | 14% | 1.000 | GPC | 0.000 | 999% | 0.000 | PCh | 23.443 | 77% | 0.791 | GSH | 0.000 | 999% | 0.000 | Ins | 107.744 | 23% | 3.638 | Lac | 36.733 | 29% | 1.240 | NAA | 5.511 | 29% | 0.186 | NAAG | 1.743 | 97% | 5.9E-02 | Scyllo | 8.430 | 102% | 0.285 | Tau | 9.511 | 103% | 0.321 | -CrCH2 | 29.620 | 14% | 1.000 | GPC+PCh | 42.244 | 29% | 1.426 | NAA+NAAG | 22.984 | 56% | 0.776 | Cr+PCr | 146.104 | 32% | 4.933 | Glu+Gln | <table><tr><td>icolst= 10</td></tr><tr><td>irowen= 13</td></tr><tr><td>irowst= 9</td></tr><tr><td>islice= 1</td></tr><tr><td>lps= 8</td></tr><tr><td>ltable= 7</td></tr><tr><td>ndcols= 16</td></tr><tr><td>ndrows= 20</td></tr><tr><td>ndslic= 1</td></tr><tr><td>nunfil= 1024</td></tr><tr><td>ppmend= 1.0</td></tr><tr><td>ppmst= 4.0</td></tr><tr><td>savdir= '/home/data/Studies/GBM_Spektro/</td></tr><tr><td>results/</td></tr><tr><td>s13/'</td></tr><tr><td>sptype= 'tumor'</td></tr><tr><td>srcaswspéctrométrie_2d_spectroscopie/GBM_Spektroscopie/</td></tr><tr><td>s13</td></tr></table> | icolst= 10 | irowen= 13 | irowst= 9 | islice= 1 | lps= 8 | ltable= 7 | ndcols= 16 | ndrows= 20 | ndslic= 1 | nunfil= 1024 | ppmend= 1.0 | ppmst= 4.0 | savdir= '/home/data/Studies/GBM_Spektro/ | results/ | s13/' | sptype= 'tumor' | srcaswspéctrométrie_2d_spectroscopie/GBM_Spektroscopie/ | s13 |
| Conc.                                                                                                                                                                                                                                                                                                                                                                                                                                                                                                                                                                                                                                                                                                                                                                                                                                                                                                                                                                                                                                                                                                                                                                                                                                                                                                                                    | %SD                  | /GPC+PC | Metabolite |            |                          |        |       |     |                        |        |       |    |                                                 |        |       |     |                                   |        |       |     |                    |        |       |     |            |     |       |     |       |      |       |     |        |     |       |     |       |      |       |     |         |     |       |     |        |     |       |     |       |     |       |      |       |     |         |        |       |      |       |     |       |      |       |        |        |     |       |         |        |     |       |          |        |     |       |        |         |     |       |         |                                                                                                                                                                                                                                                                                                                                                                                                                                                                                                                                                                                                      |            |            |           |           |        |           |            |            |           |              |             |            |                                          |          |       |                 |                                                         |     |
| 0.000                                                                                                                                                                                                                                                                                                                                                                                                                                                                                                                                                                                                                                                                                                                                                                                                                                                                                                                                                                                                                                                                                                                                                                                                                                                                                                                                    | 999%                 | 0.000   | Ala        |            |                          |        |       |     |                        |        |       |    |                                                 |        |       |     |                                   |        |       |     |                    |        |       |     |            |     |       |     |       |      |       |     |        |     |       |     |       |      |       |     |         |     |       |     |        |     |       |     |       |     |       |      |       |     |         |        |       |      |       |     |       |      |       |        |        |     |       |         |        |     |       |          |        |     |       |        |         |     |       |         |                                                                                                                                                                                                                                                                                                                                                                                                                                                                                                                                                                                                      |            |            |           |           |        |           |            |            |           |              |             |            |                                          |          |       |                 |                                                         |     |
| 0.000                                                                                                                                                                                                                                                                                                                                                                                                                                                                                                                                                                                                                                                                                                                                                                                                                                                                                                                                                                                                                                                                                                                                                                                                                                                                                                                                    | 999%                 | 0.000   | Cr         |            |                          |        |       |     |                        |        |       |    |                                                 |        |       |     |                                   |        |       |     |                    |        |       |     |            |     |       |     |       |      |       |     |        |     |       |     |       |      |       |     |         |     |       |     |        |     |       |     |       |     |       |      |       |     |         |        |       |      |       |     |       |      |       |        |        |     |       |         |        |     |       |          |        |     |       |        |         |     |       |         |                                                                                                                                                                                                                                                                                                                                                                                                                                                                                                                                                                                                      |            |            |           |           |        |           |            |            |           |              |             |            |                                          |          |       |                 |                                                         |     |
| 22.984                                                                                                                                                                                                                                                                                                                                                                                                                                                                                                                                                                                                                                                                                                                                                                                                                                                                                                                                                                                                                                                                                                                                                                                                                                                                                                                                   | 56%                  | 0.776   | PCr        |            |                          |        |       |     |                        |        |       |    |                                                 |        |       |     |                                   |        |       |     |                    |        |       |     |            |     |       |     |       |      |       |     |        |     |       |     |       |      |       |     |         |     |       |     |        |     |       |     |       |     |       |      |       |     |         |        |       |      |       |     |       |      |       |        |        |     |       |         |        |     |       |          |        |     |       |        |         |     |       |         |                                                                                                                                                                                                                                                                                                                                                                                                                                                                                                                                                                                                      |            |            |           |           |        |           |            |            |           |              |             |            |                                          |          |       |                 |                                                         |     |
| 146.104                                                                                                                                                                                                                                                                                                                                                                                                                                                                                                                                                                                                                                                                                                                                                                                                                                                                                                                                                                                                                                                                                                                                                                                                                                                                                                                                  | 32%                  | 4.933   | Gln        |            |                          |        |       |     |                        |        |       |    |                                                 |        |       |     |                                   |        |       |     |                    |        |       |     |            |     |       |     |       |      |       |     |        |     |       |     |       |      |       |     |         |     |       |     |        |     |       |     |       |     |       |      |       |     |         |        |       |      |       |     |       |      |       |        |        |     |       |         |        |     |       |          |        |     |       |        |         |     |       |         |                                                                                                                                                                                                                                                                                                                                                                                                                                                                                                                                                                                                      |            |            |           |           |        |           |            |            |           |              |             |            |                                          |          |       |                 |                                                         |     |
| 0.000                                                                                                                                                                                                                                                                                                                                                                                                                                                                                                                                                                                                                                                                                                                                                                                                                                                                                                                                                                                                                                                                                                                                                                                                                                                                                                                                    | 999%                 | 0.000   | Glu        |            |                          |        |       |     |                        |        |       |    |                                                 |        |       |     |                                   |        |       |     |                    |        |       |     |            |     |       |     |       |      |       |     |        |     |       |     |       |      |       |     |         |     |       |     |        |     |       |     |       |     |       |      |       |     |         |        |       |      |       |     |       |      |       |        |        |     |       |         |        |     |       |          |        |     |       |        |         |     |       |         |                                                                                                                                                                                                                                                                                                                                                                                                                                                                                                                                                                                                      |            |            |           |           |        |           |            |            |           |              |             |            |                                          |          |       |                 |                                                         |     |
| 29.620                                                                                                                                                                                                                                                                                                                                                                                                                                                                                                                                                                                                                                                                                                                                                                                                                                                                                                                                                                                                                                                                                                                                                                                                                                                                                                                                   | 14%                  | 1.000   | GPC        |            |                          |        |       |     |                        |        |       |    |                                                 |        |       |     |                                   |        |       |     |                    |        |       |     |            |     |       |     |       |      |       |     |        |     |       |     |       |      |       |     |         |     |       |     |        |     |       |     |       |     |       |      |       |     |         |        |       |      |       |     |       |      |       |        |        |     |       |         |        |     |       |          |        |     |       |        |         |     |       |         |                                                                                                                                                                                                                                                                                                                                                                                                                                                                                                                                                                                                      |            |            |           |           |        |           |            |            |           |              |             |            |                                          |          |       |                 |                                                         |     |
| 0.000                                                                                                                                                                                                                                                                                                                                                                                                                                                                                                                                                                                                                                                                                                                                                                                                                                                                                                                                                                                                                                                                                                                                                                                                                                                                                                                                    | 999%                 | 0.000   | PCh        |            |                          |        |       |     |                        |        |       |    |                                                 |        |       |     |                                   |        |       |     |                    |        |       |     |            |     |       |     |       |      |       |     |        |     |       |     |       |      |       |     |         |     |       |     |        |     |       |     |       |     |       |      |       |     |         |        |       |      |       |     |       |      |       |        |        |     |       |         |        |     |       |          |        |     |       |        |         |     |       |         |                                                                                                                                                                                                                                                                                                                                                                                                                                                                                                                                                                                                      |            |            |           |           |        |           |            |            |           |              |             |            |                                          |          |       |                 |                                                         |     |
| 23.443                                                                                                                                                                                                                                                                                                                                                                                                                                                                                                                                                                                                                                                                                                                                                                                                                                                                                                                                                                                                                                                                                                                                                                                                                                                                                                                                   | 77%                  | 0.791   | GSH        |            |                          |        |       |     |                        |        |       |    |                                                 |        |       |     |                                   |        |       |     |                    |        |       |     |            |     |       |     |       |      |       |     |        |     |       |     |       |      |       |     |         |     |       |     |        |     |       |     |       |     |       |      |       |     |         |        |       |      |       |     |       |      |       |        |        |     |       |         |        |     |       |          |        |     |       |        |         |     |       |         |                                                                                                                                                                                                                                                                                                                                                                                                                                                                                                                                                                                                      |            |            |           |           |        |           |            |            |           |              |             |            |                                          |          |       |                 |                                                         |     |
| 0.000                                                                                                                                                                                                                                                                                                                                                                                                                                                                                                                                                                                                                                                                                                                                                                                                                                                                                                                                                                                                                                                                                                                                                                                                                                                                                                                                    | 999%                 | 0.000   | Ins        |            |                          |        |       |     |                        |        |       |    |                                                 |        |       |     |                                   |        |       |     |                    |        |       |     |            |     |       |     |       |      |       |     |        |     |       |     |       |      |       |     |         |     |       |     |        |     |       |     |       |     |       |      |       |     |         |        |       |      |       |     |       |      |       |        |        |     |       |         |        |     |       |          |        |     |       |        |         |     |       |         |                                                                                                                                                                                                                                                                                                                                                                                                                                                                                                                                                                                                      |            |            |           |           |        |           |            |            |           |              |             |            |                                          |          |       |                 |                                                         |     |
| 107.744                                                                                                                                                                                                                                                                                                                                                                                                                                                                                                                                                                                                                                                                                                                                                                                                                                                                                                                                                                                                                                                                                                                                                                                                                                                                                                                                  | 23%                  | 3.638   | Lac        |            |                          |        |       |     |                        |        |       |    |                                                 |        |       |     |                                   |        |       |     |                    |        |       |     |            |     |       |     |       |      |       |     |        |     |       |     |       |      |       |     |         |     |       |     |        |     |       |     |       |     |       |      |       |     |         |        |       |      |       |     |       |      |       |        |        |     |       |         |        |     |       |          |        |     |       |        |         |     |       |         |                                                                                                                                                                                                                                                                                                                                                                                                                                                                                                                                                                                                      |            |            |           |           |        |           |            |            |           |              |             |            |                                          |          |       |                 |                                                         |     |
| 36.733                                                                                                                                                                                                                                                                                                                                                                                                                                                                                                                                                                                                                                                                                                                                                                                                                                                                                                                                                                                                                                                                                                                                                                                                                                                                                                                                   | 29%                  | 1.240   | NAA        |            |                          |        |       |     |                        |        |       |    |                                                 |        |       |     |                                   |        |       |     |                    |        |       |     |            |     |       |     |       |      |       |     |        |     |       |     |       |      |       |     |         |     |       |     |        |     |       |     |       |     |       |      |       |     |         |        |       |      |       |     |       |      |       |        |        |     |       |         |        |     |       |          |        |     |       |        |         |     |       |         |                                                                                                                                                                                                                                                                                                                                                                                                                                                                                                                                                                                                      |            |            |           |           |        |           |            |            |           |              |             |            |                                          |          |       |                 |                                                         |     |
| 5.511                                                                                                                                                                                                                                                                                                                                                                                                                                                                                                                                                                                                                                                                                                                                                                                                                                                                                                                                                                                                                                                                                                                                                                                                                                                                                                                                    | 29%                  | 0.186   | NAAG       |            |                          |        |       |     |                        |        |       |    |                                                 |        |       |     |                                   |        |       |     |                    |        |       |     |            |     |       |     |       |      |       |     |        |     |       |     |       |      |       |     |         |     |       |     |        |     |       |     |       |     |       |      |       |     |         |        |       |      |       |     |       |      |       |        |        |     |       |         |        |     |       |          |        |     |       |        |         |     |       |         |                                                                                                                                                                                                                                                                                                                                                                                                                                                                                                                                                                                                      |            |            |           |           |        |           |            |            |           |              |             |            |                                          |          |       |                 |                                                         |     |
| 1.743                                                                                                                                                                                                                                                                                                                                                                                                                                                                                                                                                                                                                                                                                                                                                                                                                                                                                                                                                                                                                                                                                                                                                                                                                                                                                                                                    | 97%                  | 5.9E-02 | Scyllo     |            |                          |        |       |     |                        |        |       |    |                                                 |        |       |     |                                   |        |       |     |                    |        |       |     |            |     |       |     |       |      |       |     |        |     |       |     |       |      |       |     |         |     |       |     |        |     |       |     |       |     |       |      |       |     |         |        |       |      |       |     |       |      |       |        |        |     |       |         |        |     |       |          |        |     |       |        |         |     |       |         |                                                                                                                                                                                                                                                                                                                                                                                                                                                                                                                                                                                                      |            |            |           |           |        |           |            |            |           |              |             |            |                                          |          |       |                 |                                                         |     |
| 8.430                                                                                                                                                                                                                                                                                                                                                                                                                                                                                                                                                                                                                                                                                                                                                                                                                                                                                                                                                                                                                                                                                                                                                                                                                                                                                                                                    | 102%                 | 0.285   | Tau        |            |                          |        |       |     |                        |        |       |    |                                                 |        |       |     |                                   |        |       |     |                    |        |       |     |            |     |       |     |       |      |       |     |        |     |       |     |       |      |       |     |         |     |       |     |        |     |       |     |       |     |       |      |       |     |         |        |       |      |       |     |       |      |       |        |        |     |       |         |        |     |       |          |        |     |       |        |         |     |       |         |                                                                                                                                                                                                                                                                                                                                                                                                                                                                                                                                                                                                      |            |            |           |           |        |           |            |            |           |              |             |            |                                          |          |       |                 |                                                         |     |
| 9.511                                                                                                                                                                                                                                                                                                                                                                                                                                                                                                                                                                                                                                                                                                                                                                                                                                                                                                                                                                                                                                                                                                                                                                                                                                                                                                                                    | 103%                 | 0.321   | -CrCH2     |            |                          |        |       |     |                        |        |       |    |                                                 |        |       |     |                                   |        |       |     |                    |        |       |     |            |     |       |     |       |      |       |     |        |     |       |     |       |      |       |     |         |     |       |     |        |     |       |     |       |     |       |      |       |     |         |        |       |      |       |     |       |      |       |        |        |     |       |         |        |     |       |          |        |     |       |        |         |     |       |         |                                                                                                                                                                                                                                                                                                                                                                                                                                                                                                                                                                                                      |            |            |           |           |        |           |            |            |           |              |             |            |                                          |          |       |                 |                                                         |     |
| 29.620                                                                                                                                                                                                                                                                                                                                                                                                                                                                                                                                                                                                                                                                                                                                                                                                                                                                                                                                                                                                                                                                                                                                                                                                                                                                                                                                   | 14%                  | 1.000   | GPC+PCh    |            |                          |        |       |     |                        |        |       |    |                                                 |        |       |     |                                   |        |       |     |                    |        |       |     |            |     |       |     |       |      |       |     |        |     |       |     |       |      |       |     |         |     |       |     |        |     |       |     |       |     |       |      |       |     |         |        |       |      |       |     |       |      |       |        |        |     |       |         |        |     |       |          |        |     |       |        |         |     |       |         |                                                                                                                                                                                                                                                                                                                                                                                                                                                                                                                                                                                                      |            |            |           |           |        |           |            |            |           |              |             |            |                                          |          |       |                 |                                                         |     |
| 42.244                                                                                                                                                                                                                                                                                                                                                                                                                                                                                                                                                                                                                                                                                                                                                                                                                                                                                                                                                                                                                                                                                                                                                                                                                                                                                                                                   | 29%                  | 1.426   | NAA+NAAG   |            |                          |        |       |     |                        |        |       |    |                                                 |        |       |     |                                   |        |       |     |                    |        |       |     |            |     |       |     |       |      |       |     |        |     |       |     |       |      |       |     |         |     |       |     |        |     |       |     |       |     |       |      |       |     |         |        |       |      |       |     |       |      |       |        |        |     |       |         |        |     |       |          |        |     |       |        |         |     |       |         |                                                                                                                                                                                                                                                                                                                                                                                                                                                                                                                                                                                                      |            |            |           |           |        |           |            |            |           |              |             |            |                                          |          |       |                 |                                                         |     |
| 22.984                                                                                                                                                                                                                                                                                                                                                                                                                                                                                                                                                                                                                                                                                                                                                                                                                                                                                                                                                                                                                                                                                                                                                                                                                                                                                                                                   | 56%                  | 0.776   | Cr+PCr     |            |                          |        |       |     |                        |        |       |    |                                                 |        |       |     |                                   |        |       |     |                    |        |       |     |            |     |       |     |       |      |       |     |        |     |       |     |       |      |       |     |         |     |       |     |        |     |       |     |       |     |       |      |       |     |         |        |       |      |       |     |       |      |       |        |        |     |       |         |        |     |       |          |        |     |       |        |         |     |       |         |                                                                                                                                                                                                                                                                                                                                                                                                                                                                                                                                                                                                      |            |            |           |           |        |           |            |            |           |              |             |            |                                          |          |       |                 |                                                         |     |
| 146.104                                                                                                                                                                                                                                                                                                                                                                                                                                                                                                                                                                                                                                                                                                                                                                                                                                                                                                                                                                                                                                                                                                                                                                                                                                                                                                                                  | 32%                  | 4.933   | Glu+Gln    |            |                          |        |       |     |                        |        |       |    |                                                 |        |       |     |                                   |        |       |     |                    |        |       |     |            |     |       |     |       |      |       |     |        |     |       |     |       |      |       |     |         |     |       |     |        |     |       |     |       |     |       |      |       |     |         |        |       |      |       |     |       |      |       |        |        |     |       |         |        |     |       |          |        |     |       |        |         |     |       |         |                                                                                                                                                                                                                                                                                                                                                                                                                                                                                                                                                                                                      |            |            |           |           |        |           |            |            |           |              |             |            |                                          |          |       |                 |                                                         |     |
| icolst= 10                                                                                                                                                                                                                                                                                                                                                                                                                                                                                                                                                                                                                                                                                                                                                                                                                                                                                                                                                                                                                                                                                                                                                                                                                                                                                                                               |                      |         |            |            |                          |        |       |     |                        |        |       |    |                                                 |        |       |     |                                   |        |       |     |                    |        |       |     |            |     |       |     |       |      |       |     |        |     |       |     |       |      |       |     |         |     |       |     |        |     |       |     |       |     |       |      |       |     |         |        |       |      |       |     |       |      |       |        |        |     |       |         |        |     |       |          |        |     |       |        |         |     |       |         |                                                                                                                                                                                                                                                                                                                                                                                                                                                                                                                                                                                                      |            |            |           |           |        |           |            |            |           |              |             |            |                                          |          |       |                 |                                                         |     |
| irowen= 13                                                                                                                                                                                                                                                                                                                                                                                                                                                                                                                                                                                                                                                                                                                                                                                                                                                                                                                                                                                                                                                                                                                                                                                                                                                                                                                               |                      |         |            |            |                          |        |       |     |                        |        |       |    |                                                 |        |       |     |                                   |        |       |     |                    |        |       |     |            |     |       |     |       |      |       |     |        |     |       |     |       |      |       |     |         |     |       |     |        |     |       |     |       |     |       |      |       |     |         |        |       |      |       |     |       |      |       |        |        |     |       |         |        |     |       |          |        |     |       |        |         |     |       |         |                                                                                                                                                                                                                                                                                                                                                                                                                                                                                                                                                                                                      |            |            |           |           |        |           |            |            |           |              |             |            |                                          |          |       |                 |                                                         |     |
| irowst= 9                                                                                                                                                                                                                                                                                                                                                                                                                                                                                                                                                                                                                                                                                                                                                                                                                                                                                                                                                                                                                                                                                                                                                                                                                                                                                                                                |                      |         |            |            |                          |        |       |     |                        |        |       |    |                                                 |        |       |     |                                   |        |       |     |                    |        |       |     |            |     |       |     |       |      |       |     |        |     |       |     |       |      |       |     |         |     |       |     |        |     |       |     |       |     |       |      |       |     |         |        |       |      |       |     |       |      |       |        |        |     |       |         |        |     |       |          |        |     |       |        |         |     |       |         |                                                                                                                                                                                                                                                                                                                                                                                                                                                                                                                                                                                                      |            |            |           |           |        |           |            |            |           |              |             |            |                                          |          |       |                 |                                                         |     |
| islice= 1                                                                                                                                                                                                                                                                                                                                                                                                                                                                                                                                                                                                                                                                                                                                                                                                                                                                                                                                                                                                                                                                                                                                                                                                                                                                                                                                |                      |         |            |            |                          |        |       |     |                        |        |       |    |                                                 |        |       |     |                                   |        |       |     |                    |        |       |     |            |     |       |     |       |      |       |     |        |     |       |     |       |      |       |     |         |     |       |     |        |     |       |     |       |     |       |      |       |     |         |        |       |      |       |     |       |      |       |        |        |     |       |         |        |     |       |          |        |     |       |        |         |     |       |         |                                                                                                                                                                                                                                                                                                                                                                                                                                                                                                                                                                                                      |            |            |           |           |        |           |            |            |           |              |             |            |                                          |          |       |                 |                                                         |     |
| lps= 8                                                                                                                                                                                                                                                                                                                                                                                                                                                                                                                                                                                                                                                                                                                                                                                                                                                                                                                                                                                                                                                                                                                                                                                                                                                                                                                                   |                      |         |            |            |                          |        |       |     |                        |        |       |    |                                                 |        |       |     |                                   |        |       |     |                    |        |       |     |            |     |       |     |       |      |       |     |        |     |       |     |       |      |       |     |         |     |       |     |        |     |       |     |       |     |       |      |       |     |         |        |       |      |       |     |       |      |       |        |        |     |       |         |        |     |       |          |        |     |       |        |         |     |       |         |                                                                                                                                                                                                                                                                                                                                                                                                                                                                                                                                                                                                      |            |            |           |           |        |           |            |            |           |              |             |            |                                          |          |       |                 |                                                         |     |
| ltable= 7                                                                                                                                                                                                                                                                                                                                                                                                                                                                                                                                                                                                                                                                                                                                                                                                                                                                                                                                                                                                                                                                                                                                                                                                                                                                                                                                |                      |         |            |            |                          |        |       |     |                        |        |       |    |                                                 |        |       |     |                                   |        |       |     |                    |        |       |     |            |     |       |     |       |      |       |     |        |     |       |     |       |      |       |     |         |     |       |     |        |     |       |     |       |     |       |      |       |     |         |        |       |      |       |     |       |      |       |        |        |     |       |         |        |     |       |          |        |     |       |        |         |     |       |         |                                                                                                                                                                                                                                                                                                                                                                                                                                                                                                                                                                                                      |            |            |           |           |        |           |            |            |           |              |             |            |                                          |          |       |                 |                                                         |     |
| ndcols= 16                                                                                                                                                                                                                                                                                                                                                                                                                                                                                                                                                                                                                                                                                                                                                                                                                                                                                                                                                                                                                                                                                                                                                                                                                                                                                                                               |                      |         |            |            |                          |        |       |     |                        |        |       |    |                                                 |        |       |     |                                   |        |       |     |                    |        |       |     |            |     |       |     |       |      |       |     |        |     |       |     |       |      |       |     |         |     |       |     |        |     |       |     |       |     |       |      |       |     |         |        |       |      |       |     |       |      |       |        |        |     |       |         |        |     |       |          |        |     |       |        |         |     |       |         |                                                                                                                                                                                                                                                                                                                                                                                                                                                                                                                                                                                                      |            |            |           |           |        |           |            |            |           |              |             |            |                                          |          |       |                 |                                                         |     |
| ndrows= 20                                                                                                                                                                                                                                                                                                                                                                                                                                                                                                                                                                                                                                                                                                                                                                                                                                                                                                                                                                                                                                                                                                                                                                                                                                                                                                                               |                      |         |            |            |                          |        |       |     |                        |        |       |    |                                                 |        |       |     |                                   |        |       |     |                    |        |       |     |            |     |       |     |       |      |       |     |        |     |       |     |       |      |       |     |         |     |       |     |        |     |       |     |       |     |       |      |       |     |         |        |       |      |       |     |       |      |       |        |        |     |       |         |        |     |       |          |        |     |       |        |         |     |       |         |                                                                                                                                                                                                                                                                                                                                                                                                                                                                                                                                                                                                      |            |            |           |           |        |           |            |            |           |              |             |            |                                          |          |       |                 |                                                         |     |
| ndslic= 1                                                                                                                                                                                                                                                                                                                                                                                                                                                                                                                                                                                                                                                                                                                                                                                                                                                                                                                                                                                                                                                                                                                                                                                                                                                                                                                                |                      |         |            |            |                          |        |       |     |                        |        |       |    |                                                 |        |       |     |                                   |        |       |     |                    |        |       |     |            |     |       |     |       |      |       |     |        |     |       |     |       |      |       |     |         |     |       |     |        |     |       |     |       |     |       |      |       |     |         |        |       |      |       |     |       |      |       |        |        |     |       |         |        |     |       |          |        |     |       |        |         |     |       |         |                                                                                                                                                                                                                                                                                                                                                                                                                                                                                                                                                                                                      |            |            |           |           |        |           |            |            |           |              |             |            |                                          |          |       |                 |                                                         |     |
| nunfil= 1024                                                                                                                                                                                                                                                                                                                                                                                                                                                                                                                                                                                                                                                                                                                                                                                                                                                                                                                                                                                                                                                                                                                                                                                                                                                                                                                             |                      |         |            |            |                          |        |       |     |                        |        |       |    |                                                 |        |       |     |                                   |        |       |     |                    |        |       |     |            |     |       |     |       |      |       |     |        |     |       |     |       |      |       |     |         |     |       |     |        |     |       |     |       |     |       |      |       |     |         |        |       |      |       |     |       |      |       |        |        |     |       |         |        |     |       |          |        |     |       |        |         |     |       |         |                                                                                                                                                                                                                                                                                                                                                                                                                                                                                                                                                                                                      |            |            |           |           |        |           |            |            |           |              |             |            |                                          |          |       |                 |                                                         |     |
| ppmend= 1.0                                                                                                                                                                                                                                                                                                                                                                                                                                                                                                                                                                                                                                                                                                                                                                                                                                                                                                                                                                                                                                                                                                                                                                                                                                                                                                                              |                      |         |            |            |                          |        |       |     |                        |        |       |    |                                                 |        |       |     |                                   |        |       |     |                    |        |       |     |            |     |       |     |       |      |       |     |        |     |       |     |       |      |       |     |         |     |       |     |        |     |       |     |       |     |       |      |       |     |         |        |       |      |       |     |       |      |       |        |        |     |       |         |        |     |       |          |        |     |       |        |         |     |       |         |                                                                                                                                                                                                                                                                                                                                                                                                                                                                                                                                                                                                      |            |            |           |           |        |           |            |            |           |              |             |            |                                          |          |       |                 |                                                         |     |
| ppmst= 4.0                                                                                                                                                                                                                                                                                                                                                                                                                                                                                                                                                                                                                                                                                                                                                                                                                                                                                                                                                                                                                                                                                                                                                                                                                                                                                                                               |                      |         |            |            |                          |        |       |     |                        |        |       |    |                                                 |        |       |     |                                   |        |       |     |                    |        |       |     |            |     |       |     |       |      |       |     |        |     |       |     |       |      |       |     |         |     |       |     |        |     |       |     |       |     |       |      |       |     |         |        |       |      |       |     |       |      |       |        |        |     |       |         |        |     |       |          |        |     |       |        |         |     |       |         |                                                                                                                                                                                                                                                                                                                                                                                                                                                                                                                                                                                                      |            |            |           |           |        |           |            |            |           |              |             |            |                                          |          |       |                 |                                                         |     |
| savdir= '/home/data/Studies/GBM_Spektro/                                                                                                                                                                                                                                                                                                                                                                                                                                                                                                                                                                                                                                                                                                                                                                                                                                                                                                                                                                                                                                                                                                                                                                                                                                                                                                 |                      |         |            |            |                          |        |       |     |                        |        |       |    |                                                 |        |       |     |                                   |        |       |     |                    |        |       |     |            |     |       |     |       |      |       |     |        |     |       |     |       |      |       |     |         |     |       |     |        |     |       |     |       |     |       |      |       |     |         |        |       |      |       |     |       |      |       |        |        |     |       |         |        |     |       |          |        |     |       |        |         |     |       |         |                                                                                                                                                                                                                                                                                                                                                                                                                                                                                                                                                                                                      |            |            |           |           |        |           |            |            |           |              |             |            |                                          |          |       |                 |                                                         |     |
| results/                                                                                                                                                                                                                                                                                                                                                                                                                                                                                                                                                                                                                                                                                                                                                                                                                                                                                                                                                                                                                                                                                                                                                                                                                                                                                                                                 |                      |         |            |            |                          |        |       |     |                        |        |       |    |                                                 |        |       |     |                                   |        |       |     |                    |        |       |     |            |     |       |     |       |      |       |     |        |     |       |     |       |      |       |     |         |     |       |     |        |     |       |     |       |     |       |      |       |     |         |        |       |      |       |     |       |      |       |        |        |     |       |         |        |     |       |          |        |     |       |        |         |     |       |         |                                                                                                                                                                                                                                                                                                                                                                                                                                                                                                                                                                                                      |            |            |           |           |        |           |            |            |           |              |             |            |                                          |          |       |                 |                                                         |     |
| s13/'                                                                                                                                                                                                                                                                                                                                                                                                                                                                                                                                                                                                                                                                                                                                                                                                                                                                                                                                                                                                                                                                                                                                                                                                                                                                                                                                    |                      |         |            |            |                          |        |       |     |                        |        |       |    |                                                 |        |       |     |                                   |        |       |     |                    |        |       |     |            |     |       |     |       |      |       |     |        |     |       |     |       |      |       |     |         |     |       |     |        |     |       |     |       |     |       |      |       |     |         |        |       |      |       |     |       |      |       |        |        |     |       |         |        |     |       |          |        |     |       |        |         |     |       |         |                                                                                                                                                                                                                                                                                                                                                                                                                                                                                                                                                                                                      |            |            |           |           |        |           |            |            |           |              |             |            |                                          |          |       |                 |                                                         |     |
| sptype= 'tumor'                                                                                                                                                                                                                                                                                                                                                                                                                                                                                                                                                                                                                                                                                                                                                                                                                                                                                                                                                                                                                                                                                                                                                                                                                                                                                                                          |                      |         |            |            |                          |        |       |     |                        |        |       |    |                                                 |        |       |     |                                   |        |       |     |                    |        |       |     |            |     |       |     |       |      |       |     |        |     |       |     |       |      |       |     |         |     |       |     |        |     |       |     |       |     |       |      |       |     |         |        |       |      |       |     |       |      |       |        |        |     |       |         |        |     |       |          |        |     |       |        |         |     |       |         |                                                                                                                                                                                                                                                                                                                                                                                                                                                                                                                                                                                                      |            |            |           |           |        |           |            |            |           |              |             |            |                                          |          |       |                 |                                                         |     |
| srcaswspéctrométrie_2d_spectroscopie/GBM_Spektroscopie/                                                                                                                                                                                                                                                                                                                                                                                                                                                                                                                                                                                                                                                                                                                                                                                                                                                                                                                                                                                                                                                                                                                                                                                                                                                                                  |                      |         |            |            |                          |        |       |     |                        |        |       |    |                                                 |        |       |     |                                   |        |       |     |                    |        |       |     |            |     |       |     |       |      |       |     |        |     |       |     |       |      |       |     |         |     |       |     |        |     |       |     |       |     |       |      |       |     |         |        |       |      |       |     |       |      |       |        |        |     |       |         |        |     |       |          |        |     |       |        |         |     |       |         |                                                                                                                                                                                                                                                                                                                                                                                                                                                                                                                                                                                                      |            |            |           |           |        |           |            |            |           |              |             |            |                                          |          |       |                 |                                                         |     |
| s13                                                                                                                                                                                                                                                                                                                                                                                                                                                                                                                                                                                                                                                                                                                                                                                                                                                                                                                                                                                                                                                                                                                                                                                                                                                                                                                                      |                      |         |            |            |                          |        |       |     |                        |        |       |    |                                                 |        |       |     |                                   |        |       |     |                    |        |       |     |            |     |       |     |       |      |       |     |        |     |       |     |       |      |       |     |         |     |       |     |        |     |       |     |       |     |       |      |       |     |         |        |       |      |       |     |       |      |       |        |        |     |       |         |        |     |       |          |        |     |       |        |         |     |       |         |                                                                                                                                                                                                                                                                                                                                                                                                                                                                                                                                                                                                      |            |            |           |           |        |           |            |            |           |              |             |            |                                          |          |       |                 |                                                         |     |
| <table><tr><td colspan="4">DIAGNOSTICS</td></tr><tr><td>1 warning</td><td>STARTV</td><td>5</td><td></td></tr><tr><td>1 warning</td><td>STARTV</td><td>25</td><td></td></tr><tr><td>1 info</td><td>STARTV</td><td>24</td><td></td></tr><tr><td>7 info's</td><td>RFALSI</td><td>11</td><td></td></tr><tr><td>2 info's</td><td>RFALSI</td><td>4</td><td></td></tr></table>                                                                                                                                                                                                                                                                                                                                                                                                                                                                                                                                                                                                                                                                                                                                                                                                                                                                                                                                                                  | DIAGNOSTICS          |         |            |            | 1 warning                | STARTV | 5     |     | 1 warning              | STARTV | 25    |    | 1 info                                          | STARTV | 24    |     | 7 info's                          | RFALSI | 11    |     | 2 info's           | RFALSI | 4     |     |            |     |       |     |       |      |       |     |        |     |       |     |       |      |       |     |         |     |       |     |        |     |       |     |       |     |       |      |       |     |         |        |       |      |       |     |       |      |       |        |        |     |       |         |        |     |       |          |        |     |       |        |         |     |       |         |                                                                                                                                                                                                                                                                                                                                                                                                                                                                                                                                                                                                      |            |            |           |           |        |           |            |            |           |              |             |            |                                          |          |       |                 |                                                         |     |
| DIAGNOSTICS                                                                                                                                                                                                                                                                                                                                                                                                                                                                                                                                                                                                                                                                                                                                                                                                                                                                                                                                                                                                                                                                                                                                                                                                                                                                                                                              |                      |         |            |            |                          |        |       |     |                        |        |       |    |                                                 |        |       |     |                                   |        |       |     |                    |        |       |     |            |     |       |     |       |      |       |     |        |     |       |     |       |      |       |     |         |     |       |     |        |     |       |     |       |     |       |      |       |     |         |        |       |      |       |     |       |      |       |        |        |     |       |         |        |     |       |          |        |     |       |        |         |     |       |         |                                                                                                                                                                                                                                                                                                                                                                                                                                                                                                                                                                                                      |            |            |           |           |        |           |            |            |           |              |             |            |                                          |          |       |                 |                                                         |     |
| 1 warning                                                                                                                                                                                                                                                                                                                                                                                                                                                                                                                                                                                                                                                                                                                                                                                                                                                                                                                                                                                                                                                                                                                                                                                                                                                                                                                                | STARTV               | 5       |            |            |                          |        |       |     |                        |        |       |    |                                                 |        |       |     |                                   |        |       |     |                    |        |       |     |            |     |       |     |       |      |       |     |        |     |       |     |       |      |       |     |         |     |       |     |        |     |       |     |       |     |       |      |       |     |         |        |       |      |       |     |       |      |       |        |        |     |       |         |        |     |       |          |        |     |       |        |         |     |       |         |                                                                                                                                                                                                                                                                                                                                                                                                                                                                                                                                                                                                      |            |            |           |           |        |           |            |            |           |              |             |            |                                          |          |       |                 |                                                         |     |
| 1 warning                                                                                                                                                                                                                                                                                                                                                                                                                                                                                                                                                                                                                                                                                                                                                                                                                                                                                                                                                                                                                                                                                                                                                                                                                                                                                                                                | STARTV               | 25      |            |            |                          |        |       |     |                        |        |       |    |                                                 |        |       |     |                                   |        |       |     |                    |        |       |     |            |     |       |     |       |      |       |     |        |     |       |     |       |      |       |     |         |     |       |     |        |     |       |     |       |     |       |      |       |     |         |        |       |      |       |     |       |      |       |        |        |     |       |         |        |     |       |          |        |     |       |        |         |     |       |         |                                                                                                                                                                                                                                                                                                                                                                                                                                                                                                                                                                                                      |            |            |           |           |        |           |            |            |           |              |             |            |                                          |          |       |                 |                                                         |     |
| 1 info                                                                                                                                                                                                                                                                                                                                                                                                                                                                                                                                                                                                                                                                                                                                                                                                                                                                                                                                                                                                                                                                                                                                                                                                                                                                                                                                   | STARTV               | 24      |            |            |                          |        |       |     |                        |        |       |    |                                                 |        |       |     |                                   |        |       |     |                    |        |       |     |            |     |       |     |       |      |       |     |        |     |       |     |       |      |       |     |         |     |       |     |        |     |       |     |       |     |       |      |       |     |         |        |       |      |       |     |       |      |       |        |        |     |       |         |        |     |       |          |        |     |       |        |         |     |       |         |                                                                                                                                                                                                                                                                                                                                                                                                                                                                                                                                                                                                      |            |            |           |           |        |           |            |            |           |              |             |            |                                          |          |       |                 |                                                         |     |
| 7 info's                                                                                                                                                                                                                                                                                                                                                                                                                                                                                                                                                                                                                                                                                                                                                                                                                                                                                                                                                                                                                                                                                                                                                                                                                                                                                                                                 | RFALSI               | 11      |            |            |                          |        |       |     |                        |        |       |    |                                                 |        |       |     |                                   |        |       |     |                    |        |       |     |            |     |       |     |       |      |       |     |        |     |       |     |       |      |       |     |         |     |       |     |        |     |       |     |       |     |       |      |       |     |         |        |       |      |       |     |       |      |       |        |        |     |       |         |        |     |       |          |        |     |       |        |         |     |       |         |                                                                                                                                                                                                                                                                                                                                                                                                                                                                                                                                                                                                      |            |            |           |           |        |           |            |            |           |              |             |            |                                          |          |       |                 |                                                         |     |
| 2 info's                                                                                                                                                                                                                                                                                                                                                                                                                                                                                                                                                                                                                                                                                                                                                                                                                                                                                                                                                                                                                                                                                                                                                                                                                                                                                                                                 | RFALSI               | 4       |            |            |                          |        |       |     |                        |        |       |    |                                                 |        |       |     |                                   |        |       |     |                    |        |       |     |            |     |       |     |       |      |       |     |        |     |       |     |       |      |       |     |         |     |       |     |        |     |       |     |       |     |       |      |       |     |         |        |       |      |       |     |       |      |       |        |        |     |       |         |        |     |       |          |        |     |       |        |         |     |       |         |                                                                                                                                                                                                                                                                                                                                                                                                                                                                                                                                                                                                      |            |            |           |           |        |           |            |            |           |              |             |            |                                          |          |       |                 |                                                         |     |
| <table><tr><td colspan="4">MISCELLANEOUS OUTPUT</td></tr><tr><td colspan="4">FWHM = 0.168 ppm S/N = 2</td></tr><tr><td colspan="4">Data shift = 0.122 ppm</td></tr><tr><td colspan="4">Ph: 18 deg -2.1 deg/ppm</td></tr></table>                                                                                                                                                                                                                                                                                                                                                                                                                                                                                                                                                                                                                                                                                                                                                                                                                                                                                                                                                                                                                                                                                                         | MISCELLANEOUS OUTPUT |         |            |            | FWHM = 0.168 ppm S/N = 2 |        |       |     | Data shift = 0.122 ppm |        |       |    | Ph: 18 deg -2.1 deg/ppm                         |        |       |     |                                   |        |       |     |                    |        |       |     |            |     |       |     |       |      |       |     |        |     |       |     |       |      |       |     |         |     |       |     |        |     |       |     |       |     |       |      |       |     |         |        |       |      |       |     |       |      |       |        |        |     |       |         |        |     |       |          |        |     |       |        |         |     |       |         |                                                                                                                                                                                                                                                                                                                                                                                                                                                                                                                                                                                                      |            |            |           |           |        |           |            |            |           |              |             |            |                                          |          |       |                 |                                                         |     |
| MISCELLANEOUS OUTPUT                                                                                                                                                                                                                                                                                                                                                                                                                                                                                                                                                                                                                                                                                                                                                                                                                                                                                                                                                                                                                                                                                                                                                                                                                                                                                                                     |                      |         |            |            |                          |        |       |     |                        |        |       |    |                                                 |        |       |     |                                   |        |       |     |                    |        |       |     |            |     |       |     |       |      |       |     |        |     |       |     |       |      |       |     |         |     |       |     |        |     |       |     |       |     |       |      |       |     |         |        |       |      |       |     |       |      |       |        |        |     |       |         |        |     |       |          |        |     |       |        |         |     |       |         |                                                                                                                                                                                                                                                                                                                                                                                                                                                                                                                                                                                                      |            |            |           |           |        |           |            |            |           |              |             |            |                                          |          |       |                 |                                                         |     |
| FWHM = 0.168 ppm S/N = 2                                                                                                                                                                                                                                                                                                                                                                                                                                                                                                                                                                                                                                                                                                                                                                                                                                                                                                                                                                                                                                                                                                                                                                                                                                                                                                                 |                      |         |            |            |                          |        |       |     |                        |        |       |    |                                                 |        |       |     |                                   |        |       |     |                    |        |       |     |            |     |       |     |       |      |       |     |        |     |       |     |       |      |       |     |         |     |       |     |        |     |       |     |       |     |       |      |       |     |         |        |       |      |       |     |       |      |       |        |        |     |       |         |        |     |       |          |        |     |       |        |         |     |       |         |                                                                                                                                                                                                                                                                                                                                                                                                                                                                                                                                                                                                      |            |            |           |           |        |           |            |            |           |              |             |            |                                          |          |       |                 |                                                         |     |
| Data shift = 0.122 ppm                                                                                                                                                                                                                                                                                                                                                                                                                                                                                                                                                                                                                                                                                                                                                                                                                                                                                                                                                                                                                                                                                                                                                                                                                                                                                                                   |                      |         |            |            |                          |        |       |     |                        |        |       |    |                                                 |        |       |     |                                   |        |       |     |                    |        |       |     |            |     |       |     |       |      |       |     |        |     |       |     |       |      |       |     |         |     |       |     |        |     |       |     |       |     |       |      |       |     |         |        |       |      |       |     |       |      |       |        |        |     |       |         |        |     |       |          |        |     |       |        |         |     |       |         |                                                                                                                                                                                                                                                                                                                                                                                                                                                                                                                                                                                                      |            |            |           |           |        |           |            |            |           |              |             |            |                                          |          |       |                 |                                                         |     |
| Ph: 18 deg -2.1 deg/ppm                                                                                                                                                                                                                                                                                                                                                                                                                                                                                                                                                                                                                                                                                                                                                                                                                                                                                                                                                                                                                                                                                                                                                                                                                                                                                                                  |                      |         |            |            |                          |        |       |     |                        |        |       |    |                                                 |        |       |     |                                   |        |       |     |                    |        |       |     |            |     |       |     |       |      |       |     |        |     |       |     |       |      |       |     |         |     |       |     |        |     |       |     |       |     |       |      |       |     |         |        |       |      |       |     |       |      |       |        |        |     |       |         |        |     |       |          |        |     |       |        |         |     |       |         |                                                                                                                                                                                                                                                                                                                                                                                                                                                                                                                                                                                                      |            |            |           |           |        |           |            |            |           |              |             |            |                                          |          |       |                 |                                                         |     |
| <table><tr><td colspan="4">INPUT CHANGES</td></tr><tr><td colspan="4">deltat= 5.000e-04</td></tr><tr><td colspan="4">echot= 288.00</td></tr><tr><td colspan="4">filbas= '/home/stu111733/.lcmode/basis-sets/gam</td></tr><tr><td colspan="4">ma_press_te288_128mhz_662d.basis'</td></tr><tr><td colspan="4">hzpppm= 1.2776e+02</td></tr><tr><td colspan="4">icolen= 14</td></tr></table>                                                                                                                                                                                                                                                                                                                                                                                                                                                                                                                                                                                                                                                                                                                                                                                                                                                                                                                                                 | INPUT CHANGES        |         |            |            | deltat= 5.000e-04        |        |       |     | echot= 288.00          |        |       |    | filbas= '/home/stu111733/.lcmode/basis-sets/gam |        |       |     | ma_press_te288_128mhz_662d.basis' |        |       |     | hzpppm= 1.2776e+02 |        |       |     | icolen= 14 |     |       |     |       |      |       |     |        |     |       |     |       |      |       |     |         |     |       |     |        |     |       |     |       |     |       |      |       |     |         |        |       |      |       |     |       |      |       |        |        |     |       |         |        |     |       |          |        |     |       |        |         |     |       |         |                                                                                                                                                                                                                                                                                                                                                                                                                                                                                                                                                                                                      |            |            |           |           |        |           |            |            |           |              |             |            |                                          |          |       |                 |                                                         |     |
| INPUT CHANGES                                                                                                                                                                                                                                                                                                                                                                                                                                                                                                                                                                                                                                                                                                                                                                                                                                                                                                                                                                                                                                                                                                                                                                                                                                                                                                                            |                      |         |            |            |                          |        |       |     |                        |        |       |    |                                                 |        |       |     |                                   |        |       |     |                    |        |       |     |            |     |       |     |       |      |       |     |        |     |       |     |       |      |       |     |         |     |       |     |        |     |       |     |       |     |       |      |       |     |         |        |       |      |       |     |       |      |       |        |        |     |       |         |        |     |       |          |        |     |       |        |         |     |       |         |                                                                                                                                                                                                                                                                                                                                                                                                                                                                                                                                                                                                      |            |            |           |           |        |           |            |            |           |              |             |            |                                          |          |       |                 |                                                         |     |
| deltat= 5.000e-04                                                                                                                                                                                                                                                                                                                                                                                                                                                                                                                                                                                                                                                                                                                                                                                                                                                                                                                                                                                                                                                                                                                                                                                                                                                                                                                        |                      |         |            |            |                          |        |       |     |                        |        |       |    |                                                 |        |       |     |                                   |        |       |     |                    |        |       |     |            |     |       |     |       |      |       |     |        |     |       |     |       |      |       |     |         |     |       |     |        |     |       |     |       |     |       |      |       |     |         |        |       |      |       |     |       |      |       |        |        |     |       |         |        |     |       |          |        |     |       |        |         |     |       |         |                                                                                                                                                                                                                                                                                                                                                                                                                                                                                                                                                                                                      |            |            |           |           |        |           |            |            |           |              |             |            |                                          |          |       |                 |                                                         |     |
| echot= 288.00                                                                                                                                                                                                                                                                                                                                                                                                                                                                                                                                                                                                                                                                                                                                                                                                                                                                                                                                                                                                                                                                                                                                                                                                                                                                                                                            |                      |         |            |            |                          |        |       |     |                        |        |       |    |                                                 |        |       |     |                                   |        |       |     |                    |        |       |     |            |     |       |     |       |      |       |     |        |     |       |     |       |      |       |     |         |     |       |     |        |     |       |     |       |     |       |      |       |     |         |        |       |      |       |     |       |      |       |        |        |     |       |         |        |     |       |          |        |     |       |        |         |     |       |         |                                                                                                                                                                                                                                                                                                                                                                                                                                                                                                                                                                                                      |            |            |           |           |        |           |            |            |           |              |             |            |                                          |          |       |                 |                                                         |     |
| filbas= '/home/stu111733/.lcmode/basis-sets/gam                                                                                                                                                                                                                                                                                                                                                                                                                                                                                                                                                                                                                                                                                                                                                                                                                                                                                                                                                                                                                                                                                                                                                                                                                                                                                          |                      |         |            |            |                          |        |       |     |                        |        |       |    |                                                 |        |       |     |                                   |        |       |     |                    |        |       |     |            |     |       |     |       |      |       |     |        |     |       |     |       |      |       |     |         |     |       |     |        |     |       |     |       |     |       |      |       |     |         |        |       |      |       |     |       |      |       |        |        |     |       |         |        |     |       |          |        |     |       |        |         |     |       |         |                                                                                                                                                                                                                                                                                                                                                                                                                                                                                                                                                                                                      |            |            |           |           |        |           |            |            |           |              |             |            |                                          |          |       |                 |                                                         |     |
| ma_press_te288_128mhz_662d.basis'                                                                                                                                                                                                                                                                                                                                                                                                                                                                                                                                                                                                                                                                                                                                                                                                                                                                                                                                                                                                                                                                                                                                                                                                                                                                                                        |                      |         |            |            |                          |        |       |     |                        |        |       |    |                                                 |        |       |     |                                   |        |       |     |                    |        |       |     |            |     |       |     |       |      |       |     |        |     |       |     |       |      |       |     |         |     |       |     |        |     |       |     |       |     |       |      |       |     |         |        |       |      |       |     |       |      |       |        |        |     |       |         |        |     |       |          |        |     |       |        |         |     |       |         |                                                                                                                                                                                                                                                                                                                                                                                                                                                                                                                                                                                                      |            |            |           |           |        |           |            |            |           |              |             |            |                                          |          |       |                 |                                                         |     |
| hzpppm= 1.2776e+02                                                                                                                                                                                                                                                                                                                                                                                                                                                                                                                                                                                                                                                                                                                                                                                                                                                                                                                                                                                                                                                                                                                                                                                                                                                                                                                       |                      |         |            |            |                          |        |       |     |                        |        |       |    |                                                 |        |       |     |                                   |        |       |     |                    |        |       |     |            |     |       |     |       |      |       |     |        |     |       |     |       |      |       |     |         |     |       |     |        |     |       |     |       |     |       |      |       |     |         |        |       |      |       |     |       |      |       |        |        |     |       |         |        |     |       |          |        |     |       |        |         |     |       |         |                                                                                                                                                                                                                                                                                                                                                                                                                                                                                                                                                                                                      |            |            |           |           |        |           |            |            |           |              |             |            |                                          |          |       |                 |                                                         |     |
| icolen= 14                                                                                                                                                                                                                                                                                                                                                                                                                                                                                                                                                                                                                                                                                                                                                                                                                                                                                                                                                                                                                                                                                                                                                                                                                                                                                                                               |                      |         |            |            |                          |        |       |     |                        |        |       |    |                                                 |        |       |     |                                   |        |       |     |                    |        |       |     |            |     |       |     |       |      |       |     |        |     |       |     |       |      |       |     |         |     |       |     |        |     |       |     |       |     |       |      |       |     |         |        |       |      |       |     |       |      |       |        |        |     |       |         |        |     |       |          |        |     |       |        |         |     |       |         |                                                                                                                                                                                                                                                                                                                                                                                                                                                                                                                                                                                                      |            |            |           |           |        |           |            |            |           |              |             |            |                                          |          |       |                 |                                                         |     |

# P11 - edema voxel 10;11

Row#10 Col#11 MR Hirn (2018.11.14 13:31:04) Subject 13 8.00e-01 mL, TE/TR/NS=288/1500/1 (s2DSI\_TE288 TR1500)

Data of: Sektion Biomedizinische Bildgebung, Christian-Albrechts-Universitaet zu Kiel

LCModel (Version 6.3-1J) Copyright: S.W. Provencher.

Ref.: Magn. Reson. Med. 30:672-679 (1993).

19-June-2019 17:44

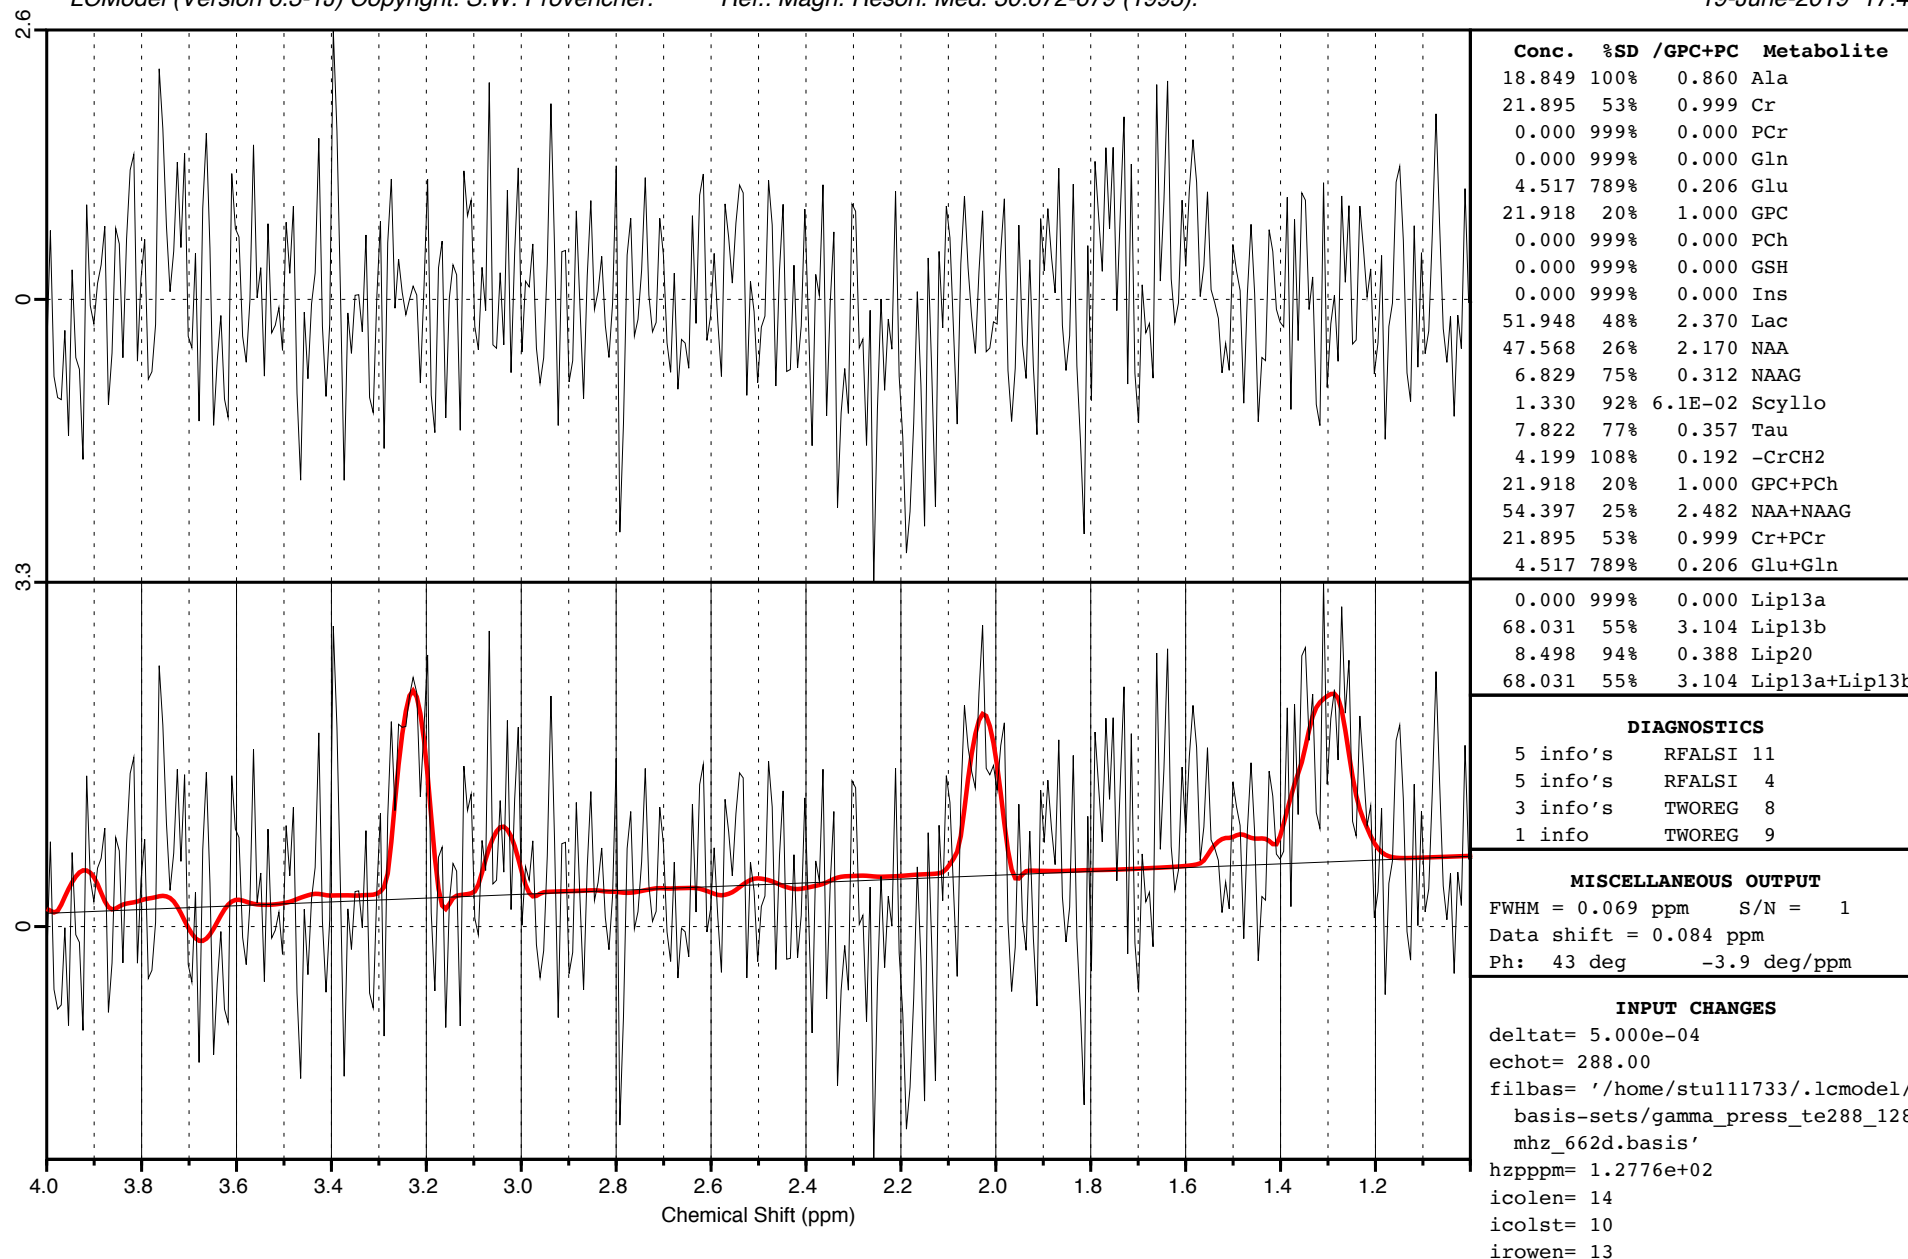

# P11 - edema voxel 10;11

Row#10 Col#11 MR Hirn (2018.11.14 13:31:04) Subject 13 8.00e-01 mL, TE/TR/NS=288/1500/1 (s2DSI\_TE288 TR1500)

Data of: *Sektion Biomedizinische Bildgebung, Christian-Albrechts-Universitaet zu Kiel*

LCModel (Version 6.3-1J) Copyright: S.W. Provencher.

Ref.: *Magn. Reson. Med. 30:672-679 (1993).*

19-June-2019 17:44

|                                                                                                                                                                                                                                                                                                                                                                                                                                                                                                                                                                                                                                                        |                                                                                                                                                                                                                                                                                       |
|--------------------------------------------------------------------------------------------------------------------------------------------------------------------------------------------------------------------------------------------------------------------------------------------------------------------------------------------------------------------------------------------------------------------------------------------------------------------------------------------------------------------------------------------------------------------------------------------------------------------------------------------------------|---------------------------------------------------------------------------------------------------------------------------------------------------------------------------------------------------------------------------------------------------------------------------------------|
| <b>Conc. %SD /GPC+PC Metabolite</b><br>18.849 100% 0.860 Ala<br>21.895 53% 0.999 Cr<br>0.000 999% 0.000 PCr<br>0.000 999% 0.000 Gln<br>4.517 789% 0.206 Glu<br>21.918 20% 1.000 GPC<br>0.000 999% 0.000 PCh<br>0.000 999% 0.000 GSH<br>0.000 999% 0.000 Ins<br>51.948 48% 2.370 Lac<br>47.568 26% 2.170 NAA<br>6.829 75% 0.312 NAAG<br>1.330 92% 6.1E-02 Scyllo<br>7.822 77% 0.357 Tau<br>4.199 108% 0.192 -CrCH2<br>21.918 20% 1.000 GPC+PCh<br>54.397 25% 2.482 NAA+NAAG<br>21.895 53% 0.999 Cr+PCr<br>4.517 789% 0.206 Glu+Gln<br><br>0.000 999% 0.000 Lip13a<br>68.031 55% 3.104 Lip13b<br>8.498 94% 0.388 Lip20<br>68.031 55% 3.104 Lip13a+Lip13b | irowen= 13<br>irowst= 9<br>islice= 1<br>lps= 8<br>ltable= 7<br>ndcols= 16<br>ndrows= 20<br>ndslic= 1<br>nunfil= 1024<br>ppmend= 1.0<br>ppmst= 4.0<br>savdir= '/home/data/Studies/GBM_Spektro/<br>results/<br>s13/'<br>sptype= 'tumor'<br>srcname= 'home12dapecstod1e3d1_raw_act.SDAT' |
| <b>DIAGNOSTICS</b><br>5 info's RFALSI 11<br>5 info's RFALSI 4<br>3 info's TWOREG 8<br>1 info TWOREG 9                                                                                                                                                                                                                                                                                                                                                                                                                                                                                                                                                  |                                                                                                                                                                                                                                                                                       |
| <b>MISCELLANEOUS OUTPUT</b><br>FWHM = 0.069 ppm S/N = 1<br>Data shift = 0.084 ppm<br>Ph: 43 deg -3.9 deg/ppm                                                                                                                                                                                                                                                                                                                                                                                                                                                                                                                                           |                                                                                                                                                                                                                                                                                       |
| <b>INPUT CHANGES</b><br>deltat= 5.000e-04<br>echot= 288.00<br>filbas= '/home/stu111733/.lcmmodel/basis-sets/gam<br>ma_press_te288_128mhz_662d.basis'<br>hzpppm= 1.2776e+02<br>icolen= 14<br>icolst= 10                                                                                                                                                                                                                                                                                                                                                                                                                                                 |                                                                                                                                                                                                                                                                                       |

# P12 - tumor voxel 19;8

Row#19 Col#8 MR Spektroskopie (2018.11.20 09:44:02) Subject 01 8.00e-01 mL, TE/TR/NS=288/1500/1 (s2DSI\_TE288 TR1500)

Data of: Sektion Biomedizinische Bildgebung, Christian-Albrechts-Universitaet zu Kiel

LCModel (Version 6.3-1J) Copyright: S.W. Provencher.

Ref.: Magn. Reson. Med. 30:672-679 (1993).

13-June-2019 09:33

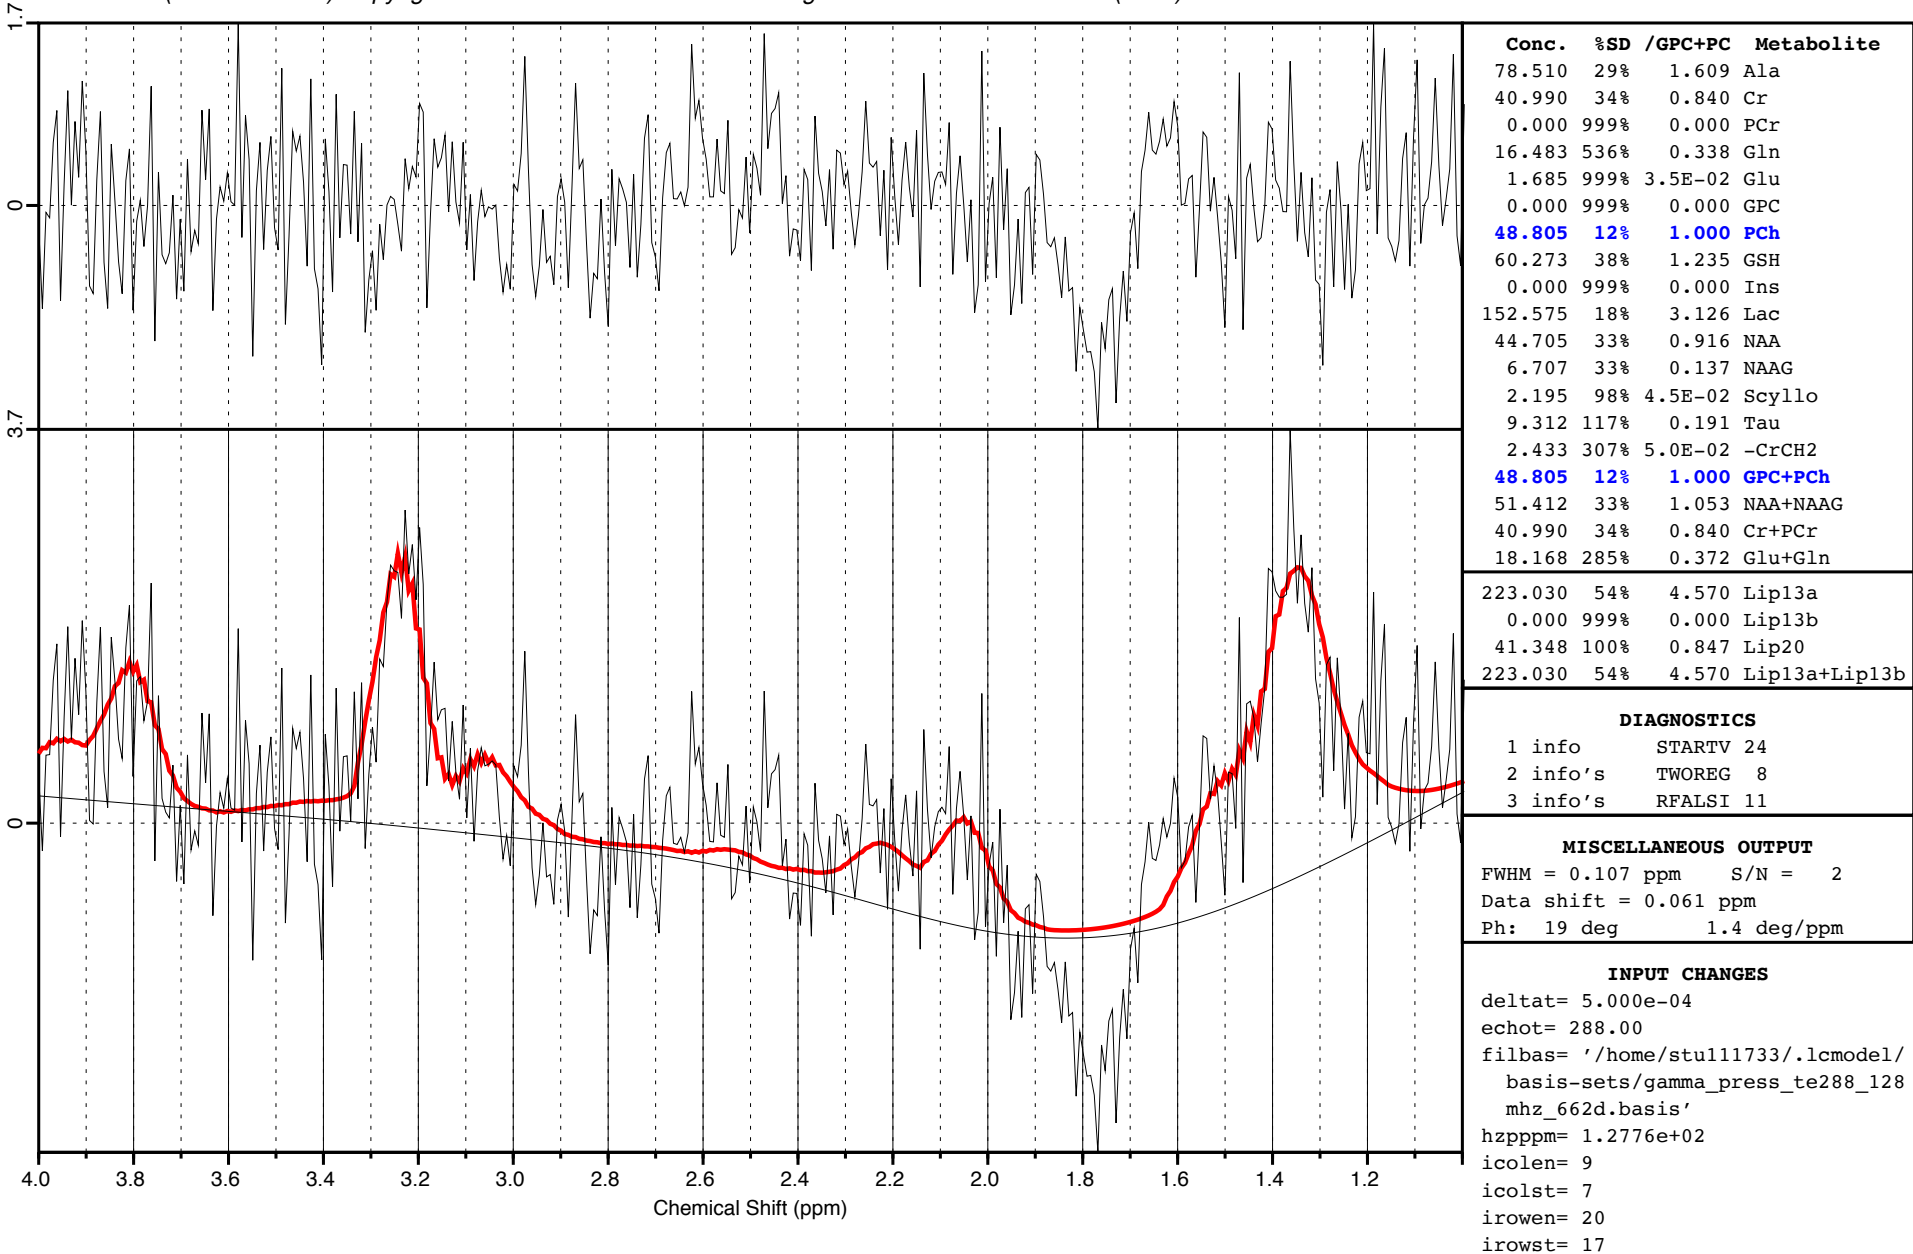

# P12 - tumor voxel 19;8

Row#19 Col#8 MR Spektroskopie (2018.11.20 09:44:02) Subject 01 8.00e-01 mL, TE/TR/NS=288/1500/1 (s2DSI\_TE288 TR1500)

Data of: *Sektion Biomedizinische Bildgebung, Christian-Albrechts-Universitaet zu Kiel*

LCModel (Version 6.3-1J) Copyright: S.W. Provencher.

Ref.: *Magn. Reson. Med. 30:672-679 (1993).*

13-June-2019 09:33

| <table><tr><th colspan="4">Conc. %SD /GPC+PC Metabolite</th></tr><tr><td>78.510</td><td>29%</td><td>1.609</td><td>Ala</td></tr><tr><td>40.990</td><td>34%</td><td>0.840</td><td>Cr</td></tr><tr><td>0.000</td><td>999%</td><td>0.000</td><td>PCr</td></tr><tr><td>16.483</td><td>536%</td><td>0.338</td><td>Gln</td></tr><tr><td>1.685</td><td>999%</td><td>3.5E-02</td><td>Glu</td></tr><tr><td>0.000</td><td>999%</td><td>0.000</td><td>GPC</td></tr><tr><td>48.805</td><td>12%</td><td>1.000</td><td>PCh</td></tr><tr><td>60.273</td><td>38%</td><td>1.235</td><td>GSH</td></tr><tr><td>0.000</td><td>999%</td><td>0.000</td><td>Ins</td></tr><tr><td>152.575</td><td>18%</td><td>3.126</td><td>Lac</td></tr><tr><td>44.705</td><td>33%</td><td>0.916</td><td>NAA</td></tr><tr><td>6.707</td><td>33%</td><td>0.137</td><td>NAAG</td></tr><tr><td>2.195</td><td>98%</td><td>4.5E-02</td><td>Scyllo</td></tr><tr><td>9.312</td><td>117%</td><td>0.191</td><td>Tau</td></tr><tr><td>2.433</td><td>307%</td><td>5.0E-02</td><td>-CrCH2</td></tr><tr><td>48.805</td><td>12%</td><td>1.000</td><td>GPC+PCh</td></tr><tr><td>51.412</td><td>33%</td><td>1.053</td><td>NAA+NAAG</td></tr><tr><td>40.990</td><td>34%</td><td>0.840</td><td>Cr+PCr</td></tr><tr><td>18.168</td><td>285%</td><td>0.372</td><td>Glu+Gln</td></tr></table> | Conc. %SD /GPC+PC Metabolite |         |               |        | 78.510                   | 29%  | 1.609  | Ala    | 40.990                 | 34%    | 0.840  | Cr    | 0.000                                            | 999%   | 0.000  | PCr           | 16.483                            | 536% | 0.338 | Gln | 1.685              | 999% | 3.5E-02 | Glu | 0.000     | 999% | 0.000 | GPC | 48.805    | 12% | 1.000 | PCh | 60.273     | 38% | 1.235 | GSH | 0.000 | 999% | 0.000 | Ins | 152.575 | 18% | 3.126 | Lac | 44.705 | 33% | 0.916 | NAA | 6.707 | 33% | 0.137 | NAAG | 2.195 | 98% | 4.5E-02 | Scyllo | 9.312 | 117% | 0.191 | Tau | 2.433 | 307% | 5.0E-02 | -CrCH2 | 48.805 | 12% | 1.000 | GPC+PCh | 51.412 | 33% | 1.053 | NAA+NAAG | 40.990 | 34% | 0.840 | Cr+PCr | 18.168 | 285% | 0.372 | Glu+Gln | <table><tr><td>irowst= 17</td></tr><tr><td>islice= 1</td></tr><tr><td>lps= 8</td></tr><tr><td>ltable= 7</td></tr><tr><td>ndcols= 16</td></tr><tr><td>ndrows= 20</td></tr><tr><td>ndslic= 1</td></tr><tr><td>nunfil= 1024</td></tr><tr><td>ppmend= 1.0</td></tr><tr><td>ppmst= 4.0</td></tr><tr><td>savdir= '/home/data/Studies/GBM_Spektro/</td></tr><tr><td>results/s01/'</td></tr><tr><td>sptype= 'tumor'</td></tr><tr><td>srcraw= '/home/data/Studies/GBM_Spektro/data/</td></tr><tr><td>s01/DIEX_5_1_raw_act.SDAT'</td></tr></table> | irowst= 17 | islice= 1 | lps= 8 | ltable= 7 | ndcols= 16 | ndrows= 20 | ndslic= 1 | nunfil= 1024 | ppmend= 1.0 | ppmst= 4.0 | savdir= '/home/data/Studies/GBM_Spektro/ | results/s01/' | sptype= 'tumor' | srcraw= '/home/data/Studies/GBM_Spektro/data/ | s01/DIEX_5_1_raw_act.SDAT' |
|----------------------------------------------------------------------------------------------------------------------------------------------------------------------------------------------------------------------------------------------------------------------------------------------------------------------------------------------------------------------------------------------------------------------------------------------------------------------------------------------------------------------------------------------------------------------------------------------------------------------------------------------------------------------------------------------------------------------------------------------------------------------------------------------------------------------------------------------------------------------------------------------------------------------------------------------------------------------------------------------------------------------------------------------------------------------------------------------------------------------------------------------------------------------------------------------------------------------------------------------------------------------------------------------------------------------------------|------------------------------|---------|---------------|--------|--------------------------|------|--------|--------|------------------------|--------|--------|-------|--------------------------------------------------|--------|--------|---------------|-----------------------------------|------|-------|-----|--------------------|------|---------|-----|-----------|------|-------|-----|-----------|-----|-------|-----|------------|-----|-------|-----|-------|------|-------|-----|---------|-----|-------|-----|--------|-----|-------|-----|-------|-----|-------|------|-------|-----|---------|--------|-------|------|-------|-----|-------|------|---------|--------|--------|-----|-------|---------|--------|-----|-------|----------|--------|-----|-------|--------|--------|------|-------|---------|------------------------------------------------------------------------------------------------------------------------------------------------------------------------------------------------------------------------------------------------------------------------------------------------------------------------------------------------------------------------------------------------------------------------------------------------------------------------------------------------------------------------------------------|------------|-----------|--------|-----------|------------|------------|-----------|--------------|-------------|------------|------------------------------------------|---------------|-----------------|-----------------------------------------------|----------------------------|
| Conc. %SD /GPC+PC Metabolite                                                                                                                                                                                                                                                                                                                                                                                                                                                                                                                                                                                                                                                                                                                                                                                                                                                                                                                                                                                                                                                                                                                                                                                                                                                                                                     |                              |         |               |        |                          |      |        |        |                        |        |        |       |                                                  |        |        |               |                                   |      |       |     |                    |      |         |     |           |      |       |     |           |     |       |     |            |     |       |     |       |      |       |     |         |     |       |     |        |     |       |     |       |     |       |      |       |     |         |        |       |      |       |     |       |      |         |        |        |     |       |         |        |     |       |          |        |     |       |        |        |      |       |         |                                                                                                                                                                                                                                                                                                                                                                                                                                                                                                                                          |            |           |        |           |            |            |           |              |             |            |                                          |               |                 |                                               |                            |
| 78.510                                                                                                                                                                                                                                                                                                                                                                                                                                                                                                                                                                                                                                                                                                                                                                                                                                                                                                                                                                                                                                                                                                                                                                                                                                                                                                                           | 29%                          | 1.609   | Ala           |        |                          |      |        |        |                        |        |        |       |                                                  |        |        |               |                                   |      |       |     |                    |      |         |     |           |      |       |     |           |     |       |     |            |     |       |     |       |      |       |     |         |     |       |     |        |     |       |     |       |     |       |      |       |     |         |        |       |      |       |     |       |      |         |        |        |     |       |         |        |     |       |          |        |     |       |        |        |      |       |         |                                                                                                                                                                                                                                                                                                                                                                                                                                                                                                                                          |            |           |        |           |            |            |           |              |             |            |                                          |               |                 |                                               |                            |
| 40.990                                                                                                                                                                                                                                                                                                                                                                                                                                                                                                                                                                                                                                                                                                                                                                                                                                                                                                                                                                                                                                                                                                                                                                                                                                                                                                                           | 34%                          | 0.840   | Cr            |        |                          |      |        |        |                        |        |        |       |                                                  |        |        |               |                                   |      |       |     |                    |      |         |     |           |      |       |     |           |     |       |     |            |     |       |     |       |      |       |     |         |     |       |     |        |     |       |     |       |     |       |      |       |     |         |        |       |      |       |     |       |      |         |        |        |     |       |         |        |     |       |          |        |     |       |        |        |      |       |         |                                                                                                                                                                                                                                                                                                                                                                                                                                                                                                                                          |            |           |        |           |            |            |           |              |             |            |                                          |               |                 |                                               |                            |
| 0.000                                                                                                                                                                                                                                                                                                                                                                                                                                                                                                                                                                                                                                                                                                                                                                                                                                                                                                                                                                                                                                                                                                                                                                                                                                                                                                                            | 999%                         | 0.000   | PCr           |        |                          |      |        |        |                        |        |        |       |                                                  |        |        |               |                                   |      |       |     |                    |      |         |     |           |      |       |     |           |     |       |     |            |     |       |     |       |      |       |     |         |     |       |     |        |     |       |     |       |     |       |      |       |     |         |        |       |      |       |     |       |      |         |        |        |     |       |         |        |     |       |          |        |     |       |        |        |      |       |         |                                                                                                                                                                                                                                                                                                                                                                                                                                                                                                                                          |            |           |        |           |            |            |           |              |             |            |                                          |               |                 |                                               |                            |
| 16.483                                                                                                                                                                                                                                                                                                                                                                                                                                                                                                                                                                                                                                                                                                                                                                                                                                                                                                                                                                                                                                                                                                                                                                                                                                                                                                                           | 536%                         | 0.338   | Gln           |        |                          |      |        |        |                        |        |        |       |                                                  |        |        |               |                                   |      |       |     |                    |      |         |     |           |      |       |     |           |     |       |     |            |     |       |     |       |      |       |     |         |     |       |     |        |     |       |     |       |     |       |      |       |     |         |        |       |      |       |     |       |      |         |        |        |     |       |         |        |     |       |          |        |     |       |        |        |      |       |         |                                                                                                                                                                                                                                                                                                                                                                                                                                                                                                                                          |            |           |        |           |            |            |           |              |             |            |                                          |               |                 |                                               |                            |
| 1.685                                                                                                                                                                                                                                                                                                                                                                                                                                                                                                                                                                                                                                                                                                                                                                                                                                                                                                                                                                                                                                                                                                                                                                                                                                                                                                                            | 999%                         | 3.5E-02 | Glu           |        |                          |      |        |        |                        |        |        |       |                                                  |        |        |               |                                   |      |       |     |                    |      |         |     |           |      |       |     |           |     |       |     |            |     |       |     |       |      |       |     |         |     |       |     |        |     |       |     |       |     |       |      |       |     |         |        |       |      |       |     |       |      |         |        |        |     |       |         |        |     |       |          |        |     |       |        |        |      |       |         |                                                                                                                                                                                                                                                                                                                                                                                                                                                                                                                                          |            |           |        |           |            |            |           |              |             |            |                                          |               |                 |                                               |                            |
| 0.000                                                                                                                                                                                                                                                                                                                                                                                                                                                                                                                                                                                                                                                                                                                                                                                                                                                                                                                                                                                                                                                                                                                                                                                                                                                                                                                            | 999%                         | 0.000   | GPC           |        |                          |      |        |        |                        |        |        |       |                                                  |        |        |               |                                   |      |       |     |                    |      |         |     |           |      |       |     |           |     |       |     |            |     |       |     |       |      |       |     |         |     |       |     |        |     |       |     |       |     |       |      |       |     |         |        |       |      |       |     |       |      |         |        |        |     |       |         |        |     |       |          |        |     |       |        |        |      |       |         |                                                                                                                                                                                                                                                                                                                                                                                                                                                                                                                                          |            |           |        |           |            |            |           |              |             |            |                                          |               |                 |                                               |                            |
| 48.805                                                                                                                                                                                                                                                                                                                                                                                                                                                                                                                                                                                                                                                                                                                                                                                                                                                                                                                                                                                                                                                                                                                                                                                                                                                                                                                           | 12%                          | 1.000   | PCh           |        |                          |      |        |        |                        |        |        |       |                                                  |        |        |               |                                   |      |       |     |                    |      |         |     |           |      |       |     |           |     |       |     |            |     |       |     |       |      |       |     |         |     |       |     |        |     |       |     |       |     |       |      |       |     |         |        |       |      |       |     |       |      |         |        |        |     |       |         |        |     |       |          |        |     |       |        |        |      |       |         |                                                                                                                                                                                                                                                                                                                                                                                                                                                                                                                                          |            |           |        |           |            |            |           |              |             |            |                                          |               |                 |                                               |                            |
| 60.273                                                                                                                                                                                                                                                                                                                                                                                                                                                                                                                                                                                                                                                                                                                                                                                                                                                                                                                                                                                                                                                                                                                                                                                                                                                                                                                           | 38%                          | 1.235   | GSH           |        |                          |      |        |        |                        |        |        |       |                                                  |        |        |               |                                   |      |       |     |                    |      |         |     |           |      |       |     |           |     |       |     |            |     |       |     |       |      |       |     |         |     |       |     |        |     |       |     |       |     |       |      |       |     |         |        |       |      |       |     |       |      |         |        |        |     |       |         |        |     |       |          |        |     |       |        |        |      |       |         |                                                                                                                                                                                                                                                                                                                                                                                                                                                                                                                                          |            |           |        |           |            |            |           |              |             |            |                                          |               |                 |                                               |                            |
| 0.000                                                                                                                                                                                                                                                                                                                                                                                                                                                                                                                                                                                                                                                                                                                                                                                                                                                                                                                                                                                                                                                                                                                                                                                                                                                                                                                            | 999%                         | 0.000   | Ins           |        |                          |      |        |        |                        |        |        |       |                                                  |        |        |               |                                   |      |       |     |                    |      |         |     |           |      |       |     |           |     |       |     |            |     |       |     |       |      |       |     |         |     |       |     |        |     |       |     |       |     |       |      |       |     |         |        |       |      |       |     |       |      |         |        |        |     |       |         |        |     |       |          |        |     |       |        |        |      |       |         |                                                                                                                                                                                                                                                                                                                                                                                                                                                                                                                                          |            |           |        |           |            |            |           |              |             |            |                                          |               |                 |                                               |                            |
| 152.575                                                                                                                                                                                                                                                                                                                                                                                                                                                                                                                                                                                                                                                                                                                                                                                                                                                                                                                                                                                                                                                                                                                                                                                                                                                                                                                          | 18%                          | 3.126   | Lac           |        |                          |      |        |        |                        |        |        |       |                                                  |        |        |               |                                   |      |       |     |                    |      |         |     |           |      |       |     |           |     |       |     |            |     |       |     |       |      |       |     |         |     |       |     |        |     |       |     |       |     |       |      |       |     |         |        |       |      |       |     |       |      |         |        |        |     |       |         |        |     |       |          |        |     |       |        |        |      |       |         |                                                                                                                                                                                                                                                                                                                                                                                                                                                                                                                                          |            |           |        |           |            |            |           |              |             |            |                                          |               |                 |                                               |                            |
| 44.705                                                                                                                                                                                                                                                                                                                                                                                                                                                                                                                                                                                                                                                                                                                                                                                                                                                                                                                                                                                                                                                                                                                                                                                                                                                                                                                           | 33%                          | 0.916   | NAA           |        |                          |      |        |        |                        |        |        |       |                                                  |        |        |               |                                   |      |       |     |                    |      |         |     |           |      |       |     |           |     |       |     |            |     |       |     |       |      |       |     |         |     |       |     |        |     |       |     |       |     |       |      |       |     |         |        |       |      |       |     |       |      |         |        |        |     |       |         |        |     |       |          |        |     |       |        |        |      |       |         |                                                                                                                                                                                                                                                                                                                                                                                                                                                                                                                                          |            |           |        |           |            |            |           |              |             |            |                                          |               |                 |                                               |                            |
| 6.707                                                                                                                                                                                                                                                                                                                                                                                                                                                                                                                                                                                                                                                                                                                                                                                                                                                                                                                                                                                                                                                                                                                                                                                                                                                                                                                            | 33%                          | 0.137   | NAAG          |        |                          |      |        |        |                        |        |        |       |                                                  |        |        |               |                                   |      |       |     |                    |      |         |     |           |      |       |     |           |     |       |     |            |     |       |     |       |      |       |     |         |     |       |     |        |     |       |     |       |     |       |      |       |     |         |        |       |      |       |     |       |      |         |        |        |     |       |         |        |     |       |          |        |     |       |        |        |      |       |         |                                                                                                                                                                                                                                                                                                                                                                                                                                                                                                                                          |            |           |        |           |            |            |           |              |             |            |                                          |               |                 |                                               |                            |
| 2.195                                                                                                                                                                                                                                                                                                                                                                                                                                                                                                                                                                                                                                                                                                                                                                                                                                                                                                                                                                                                                                                                                                                                                                                                                                                                                                                            | 98%                          | 4.5E-02 | Scyllo        |        |                          |      |        |        |                        |        |        |       |                                                  |        |        |               |                                   |      |       |     |                    |      |         |     |           |      |       |     |           |     |       |     |            |     |       |     |       |      |       |     |         |     |       |     |        |     |       |     |       |     |       |      |       |     |         |        |       |      |       |     |       |      |         |        |        |     |       |         |        |     |       |          |        |     |       |        |        |      |       |         |                                                                                                                                                                                                                                                                                                                                                                                                                                                                                                                                          |            |           |        |           |            |            |           |              |             |            |                                          |               |                 |                                               |                            |
| 9.312                                                                                                                                                                                                                                                                                                                                                                                                                                                                                                                                                                                                                                                                                                                                                                                                                                                                                                                                                                                                                                                                                                                                                                                                                                                                                                                            | 117%                         | 0.191   | Tau           |        |                          |      |        |        |                        |        |        |       |                                                  |        |        |               |                                   |      |       |     |                    |      |         |     |           |      |       |     |           |     |       |     |            |     |       |     |       |      |       |     |         |     |       |     |        |     |       |     |       |     |       |      |       |     |         |        |       |      |       |     |       |      |         |        |        |     |       |         |        |     |       |          |        |     |       |        |        |      |       |         |                                                                                                                                                                                                                                                                                                                                                                                                                                                                                                                                          |            |           |        |           |            |            |           |              |             |            |                                          |               |                 |                                               |                            |
| 2.433                                                                                                                                                                                                                                                                                                                                                                                                                                                                                                                                                                                                                                                                                                                                                                                                                                                                                                                                                                                                                                                                                                                                                                                                                                                                                                                            | 307%                         | 5.0E-02 | -CrCH2        |        |                          |      |        |        |                        |        |        |       |                                                  |        |        |               |                                   |      |       |     |                    |      |         |     |           |      |       |     |           |     |       |     |            |     |       |     |       |      |       |     |         |     |       |     |        |     |       |     |       |     |       |      |       |     |         |        |       |      |       |     |       |      |         |        |        |     |       |         |        |     |       |          |        |     |       |        |        |      |       |         |                                                                                                                                                                                                                                                                                                                                                                                                                                                                                                                                          |            |           |        |           |            |            |           |              |             |            |                                          |               |                 |                                               |                            |
| 48.805                                                                                                                                                                                                                                                                                                                                                                                                                                                                                                                                                                                                                                                                                                                                                                                                                                                                                                                                                                                                                                                                                                                                                                                                                                                                                                                           | 12%                          | 1.000   | GPC+PCh       |        |                          |      |        |        |                        |        |        |       |                                                  |        |        |               |                                   |      |       |     |                    |      |         |     |           |      |       |     |           |     |       |     |            |     |       |     |       |      |       |     |         |     |       |     |        |     |       |     |       |     |       |      |       |     |         |        |       |      |       |     |       |      |         |        |        |     |       |         |        |     |       |          |        |     |       |        |        |      |       |         |                                                                                                                                                                                                                                                                                                                                                                                                                                                                                                                                          |            |           |        |           |            |            |           |              |             |            |                                          |               |                 |                                               |                            |
| 51.412                                                                                                                                                                                                                                                                                                                                                                                                                                                                                                                                                                                                                                                                                                                                                                                                                                                                                                                                                                                                                                                                                                                                                                                                                                                                                                                           | 33%                          | 1.053   | NAA+NAAG      |        |                          |      |        |        |                        |        |        |       |                                                  |        |        |               |                                   |      |       |     |                    |      |         |     |           |      |       |     |           |     |       |     |            |     |       |     |       |      |       |     |         |     |       |     |        |     |       |     |       |     |       |      |       |     |         |        |       |      |       |     |       |      |         |        |        |     |       |         |        |     |       |          |        |     |       |        |        |      |       |         |                                                                                                                                                                                                                                                                                                                                                                                                                                                                                                                                          |            |           |        |           |            |            |           |              |             |            |                                          |               |                 |                                               |                            |
| 40.990                                                                                                                                                                                                                                                                                                                                                                                                                                                                                                                                                                                                                                                                                                                                                                                                                                                                                                                                                                                                                                                                                                                                                                                                                                                                                                                           | 34%                          | 0.840   | Cr+PCr        |        |                          |      |        |        |                        |        |        |       |                                                  |        |        |               |                                   |      |       |     |                    |      |         |     |           |      |       |     |           |     |       |     |            |     |       |     |       |      |       |     |         |     |       |     |        |     |       |     |       |     |       |      |       |     |         |        |       |      |       |     |       |      |         |        |        |     |       |         |        |     |       |          |        |     |       |        |        |      |       |         |                                                                                                                                                                                                                                                                                                                                                                                                                                                                                                                                          |            |           |        |           |            |            |           |              |             |            |                                          |               |                 |                                               |                            |
| 18.168                                                                                                                                                                                                                                                                                                                                                                                                                                                                                                                                                                                                                                                                                                                                                                                                                                                                                                                                                                                                                                                                                                                                                                                                                                                                                                                           | 285%                         | 0.372   | Glu+Gln       |        |                          |      |        |        |                        |        |        |       |                                                  |        |        |               |                                   |      |       |     |                    |      |         |     |           |      |       |     |           |     |       |     |            |     |       |     |       |      |       |     |         |     |       |     |        |     |       |     |       |     |       |      |       |     |         |        |       |      |       |     |       |      |         |        |        |     |       |         |        |     |       |          |        |     |       |        |        |      |       |         |                                                                                                                                                                                                                                                                                                                                                                                                                                                                                                                                          |            |           |        |           |            |            |           |              |             |            |                                          |               |                 |                                               |                            |
| irowst= 17                                                                                                                                                                                                                                                                                                                                                                                                                                                                                                                                                                                                                                                                                                                                                                                                                                                                                                                                                                                                                                                                                                                                                                                                                                                                                                                       |                              |         |               |        |                          |      |        |        |                        |        |        |       |                                                  |        |        |               |                                   |      |       |     |                    |      |         |     |           |      |       |     |           |     |       |     |            |     |       |     |       |      |       |     |         |     |       |     |        |     |       |     |       |     |       |      |       |     |         |        |       |      |       |     |       |      |         |        |        |     |       |         |        |     |       |          |        |     |       |        |        |      |       |         |                                                                                                                                                                                                                                                                                                                                                                                                                                                                                                                                          |            |           |        |           |            |            |           |              |             |            |                                          |               |                 |                                               |                            |
| islice= 1                                                                                                                                                                                                                                                                                                                                                                                                                                                                                                                                                                                                                                                                                                                                                                                                                                                                                                                                                                                                                                                                                                                                                                                                                                                                                                                        |                              |         |               |        |                          |      |        |        |                        |        |        |       |                                                  |        |        |               |                                   |      |       |     |                    |      |         |     |           |      |       |     |           |     |       |     |            |     |       |     |       |      |       |     |         |     |       |     |        |     |       |     |       |     |       |      |       |     |         |        |       |      |       |     |       |      |         |        |        |     |       |         |        |     |       |          |        |     |       |        |        |      |       |         |                                                                                                                                                                                                                                                                                                                                                                                                                                                                                                                                          |            |           |        |           |            |            |           |              |             |            |                                          |               |                 |                                               |                            |
| lps= 8                                                                                                                                                                                                                                                                                                                                                                                                                                                                                                                                                                                                                                                                                                                                                                                                                                                                                                                                                                                                                                                                                                                                                                                                                                                                                                                           |                              |         |               |        |                          |      |        |        |                        |        |        |       |                                                  |        |        |               |                                   |      |       |     |                    |      |         |     |           |      |       |     |           |     |       |     |            |     |       |     |       |      |       |     |         |     |       |     |        |     |       |     |       |     |       |      |       |     |         |        |       |      |       |     |       |      |         |        |        |     |       |         |        |     |       |          |        |     |       |        |        |      |       |         |                                                                                                                                                                                                                                                                                                                                                                                                                                                                                                                                          |            |           |        |           |            |            |           |              |             |            |                                          |               |                 |                                               |                            |
| ltable= 7                                                                                                                                                                                                                                                                                                                                                                                                                                                                                                                                                                                                                                                                                                                                                                                                                                                                                                                                                                                                                                                                                                                                                                                                                                                                                                                        |                              |         |               |        |                          |      |        |        |                        |        |        |       |                                                  |        |        |               |                                   |      |       |     |                    |      |         |     |           |      |       |     |           |     |       |     |            |     |       |     |       |      |       |     |         |     |       |     |        |     |       |     |       |     |       |      |       |     |         |        |       |      |       |     |       |      |         |        |        |     |       |         |        |     |       |          |        |     |       |        |        |      |       |         |                                                                                                                                                                                                                                                                                                                                                                                                                                                                                                                                          |            |           |        |           |            |            |           |              |             |            |                                          |               |                 |                                               |                            |
| ndcols= 16                                                                                                                                                                                                                                                                                                                                                                                                                                                                                                                                                                                                                                                                                                                                                                                                                                                                                                                                                                                                                                                                                                                                                                                                                                                                                                                       |                              |         |               |        |                          |      |        |        |                        |        |        |       |                                                  |        |        |               |                                   |      |       |     |                    |      |         |     |           |      |       |     |           |     |       |     |            |     |       |     |       |      |       |     |         |     |       |     |        |     |       |     |       |     |       |      |       |     |         |        |       |      |       |     |       |      |         |        |        |     |       |         |        |     |       |          |        |     |       |        |        |      |       |         |                                                                                                                                                                                                                                                                                                                                                                                                                                                                                                                                          |            |           |        |           |            |            |           |              |             |            |                                          |               |                 |                                               |                            |
| ndrows= 20                                                                                                                                                                                                                                                                                                                                                                                                                                                                                                                                                                                                                                                                                                                                                                                                                                                                                                                                                                                                                                                                                                                                                                                                                                                                                                                       |                              |         |               |        |                          |      |        |        |                        |        |        |       |                                                  |        |        |               |                                   |      |       |     |                    |      |         |     |           |      |       |     |           |     |       |     |            |     |       |     |       |      |       |     |         |     |       |     |        |     |       |     |       |     |       |      |       |     |         |        |       |      |       |     |       |      |         |        |        |     |       |         |        |     |       |          |        |     |       |        |        |      |       |         |                                                                                                                                                                                                                                                                                                                                                                                                                                                                                                                                          |            |           |        |           |            |            |           |              |             |            |                                          |               |                 |                                               |                            |
| ndslic= 1                                                                                                                                                                                                                                                                                                                                                                                                                                                                                                                                                                                                                                                                                                                                                                                                                                                                                                                                                                                                                                                                                                                                                                                                                                                                                                                        |                              |         |               |        |                          |      |        |        |                        |        |        |       |                                                  |        |        |               |                                   |      |       |     |                    |      |         |     |           |      |       |     |           |     |       |     |            |     |       |     |       |      |       |     |         |     |       |     |        |     |       |     |       |     |       |      |       |     |         |        |       |      |       |     |       |      |         |        |        |     |       |         |        |     |       |          |        |     |       |        |        |      |       |         |                                                                                                                                                                                                                                                                                                                                                                                                                                                                                                                                          |            |           |        |           |            |            |           |              |             |            |                                          |               |                 |                                               |                            |
| nunfil= 1024                                                                                                                                                                                                                                                                                                                                                                                                                                                                                                                                                                                                                                                                                                                                                                                                                                                                                                                                                                                                                                                                                                                                                                                                                                                                                                                     |                              |         |               |        |                          |      |        |        |                        |        |        |       |                                                  |        |        |               |                                   |      |       |     |                    |      |         |     |           |      |       |     |           |     |       |     |            |     |       |     |       |      |       |     |         |     |       |     |        |     |       |     |       |     |       |      |       |     |         |        |       |      |       |     |       |      |         |        |        |     |       |         |        |     |       |          |        |     |       |        |        |      |       |         |                                                                                                                                                                                                                                                                                                                                                                                                                                                                                                                                          |            |           |        |           |            |            |           |              |             |            |                                          |               |                 |                                               |                            |
| ppmend= 1.0                                                                                                                                                                                                                                                                                                                                                                                                                                                                                                                                                                                                                                                                                                                                                                                                                                                                                                                                                                                                                                                                                                                                                                                                                                                                                                                      |                              |         |               |        |                          |      |        |        |                        |        |        |       |                                                  |        |        |               |                                   |      |       |     |                    |      |         |     |           |      |       |     |           |     |       |     |            |     |       |     |       |      |       |     |         |     |       |     |        |     |       |     |       |     |       |      |       |     |         |        |       |      |       |     |       |      |         |        |        |     |       |         |        |     |       |          |        |     |       |        |        |      |       |         |                                                                                                                                                                                                                                                                                                                                                                                                                                                                                                                                          |            |           |        |           |            |            |           |              |             |            |                                          |               |                 |                                               |                            |
| ppmst= 4.0                                                                                                                                                                                                                                                                                                                                                                                                                                                                                                                                                                                                                                                                                                                                                                                                                                                                                                                                                                                                                                                                                                                                                                                                                                                                                                                       |                              |         |               |        |                          |      |        |        |                        |        |        |       |                                                  |        |        |               |                                   |      |       |     |                    |      |         |     |           |      |       |     |           |     |       |     |            |     |       |     |       |      |       |     |         |     |       |     |        |     |       |     |       |     |       |      |       |     |         |        |       |      |       |     |       |      |         |        |        |     |       |         |        |     |       |          |        |     |       |        |        |      |       |         |                                                                                                                                                                                                                                                                                                                                                                                                                                                                                                                                          |            |           |        |           |            |            |           |              |             |            |                                          |               |                 |                                               |                            |
| savdir= '/home/data/Studies/GBM_Spektro/                                                                                                                                                                                                                                                                                                                                                                                                                                                                                                                                                                                                                                                                                                                                                                                                                                                                                                                                                                                                                                                                                                                                                                                                                                                                                         |                              |         |               |        |                          |      |        |        |                        |        |        |       |                                                  |        |        |               |                                   |      |       |     |                    |      |         |     |           |      |       |     |           |     |       |     |            |     |       |     |       |      |       |     |         |     |       |     |        |     |       |     |       |     |       |      |       |     |         |        |       |      |       |     |       |      |         |        |        |     |       |         |        |     |       |          |        |     |       |        |        |      |       |         |                                                                                                                                                                                                                                                                                                                                                                                                                                                                                                                                          |            |           |        |           |            |            |           |              |             |            |                                          |               |                 |                                               |                            |
| results/s01/'                                                                                                                                                                                                                                                                                                                                                                                                                                                                                                                                                                                                                                                                                                                                                                                                                                                                                                                                                                                                                                                                                                                                                                                                                                                                                                                    |                              |         |               |        |                          |      |        |        |                        |        |        |       |                                                  |        |        |               |                                   |      |       |     |                    |      |         |     |           |      |       |     |           |     |       |     |            |     |       |     |       |      |       |     |         |     |       |     |        |     |       |     |       |     |       |      |       |     |         |        |       |      |       |     |       |      |         |        |        |     |       |         |        |     |       |          |        |     |       |        |        |      |       |         |                                                                                                                                                                                                                                                                                                                                                                                                                                                                                                                                          |            |           |        |           |            |            |           |              |             |            |                                          |               |                 |                                               |                            |
| sptype= 'tumor'                                                                                                                                                                                                                                                                                                                                                                                                                                                                                                                                                                                                                                                                                                                                                                                                                                                                                                                                                                                                                                                                                                                                                                                                                                                                                                                  |                              |         |               |        |                          |      |        |        |                        |        |        |       |                                                  |        |        |               |                                   |      |       |     |                    |      |         |     |           |      |       |     |           |     |       |     |            |     |       |     |       |      |       |     |         |     |       |     |        |     |       |     |       |     |       |      |       |     |         |        |       |      |       |     |       |      |         |        |        |     |       |         |        |     |       |          |        |     |       |        |        |      |       |         |                                                                                                                                                                                                                                                                                                                                                                                                                                                                                                                                          |            |           |        |           |            |            |           |              |             |            |                                          |               |                 |                                               |                            |
| srcraw= '/home/data/Studies/GBM_Spektro/data/                                                                                                                                                                                                                                                                                                                                                                                                                                                                                                                                                                                                                                                                                                                                                                                                                                                                                                                                                                                                                                                                                                                                                                                                                                                                                    |                              |         |               |        |                          |      |        |        |                        |        |        |       |                                                  |        |        |               |                                   |      |       |     |                    |      |         |     |           |      |       |     |           |     |       |     |            |     |       |     |       |      |       |     |         |     |       |     |        |     |       |     |       |     |       |      |       |     |         |        |       |      |       |     |       |      |         |        |        |     |       |         |        |     |       |          |        |     |       |        |        |      |       |         |                                                                                                                                                                                                                                                                                                                                                                                                                                                                                                                                          |            |           |        |           |            |            |           |              |             |            |                                          |               |                 |                                               |                            |
| s01/DIEX_5_1_raw_act.SDAT'                                                                                                                                                                                                                                                                                                                                                                                                                                                                                                                                                                                                                                                                                                                                                                                                                                                                                                                                                                                                                                                                                                                                                                                                                                                                                                       |                              |         |               |        |                          |      |        |        |                        |        |        |       |                                                  |        |        |               |                                   |      |       |     |                    |      |         |     |           |      |       |     |           |     |       |     |            |     |       |     |       |      |       |     |         |     |       |     |        |     |       |     |       |     |       |      |       |     |         |        |       |      |       |     |       |      |         |        |        |     |       |         |        |     |       |          |        |     |       |        |        |      |       |         |                                                                                                                                                                                                                                                                                                                                                                                                                                                                                                                                          |            |           |        |           |            |            |           |              |             |            |                                          |               |                 |                                               |                            |
| <table><tr><td>223.030</td><td>54%</td><td>4.570</td><td>Lip13a</td></tr><tr><td>0.000</td><td>999%</td><td>0.000</td><td>Lip13b</td></tr><tr><td>41.348</td><td>100%</td><td>0.847</td><td>Lip20</td></tr><tr><td>223.030</td><td>54%</td><td>4.570</td><td>Lip13a+Lip13b</td></tr></table>                                                                                                                                                                                                                                                                                                                                                                                                                                                                                                                                                                                                                                                                                                                                                                                                                                                                                                                                                                                                                                     | 223.030                      | 54%     | 4.570         | Lip13a | 0.000                    | 999% | 0.000  | Lip13b | 41.348                 | 100%   | 0.847  | Lip20 | 223.030                                          | 54%    | 4.570  | Lip13a+Lip13b |                                   |      |       |     |                    |      |         |     |           |      |       |     |           |     |       |     |            |     |       |     |       |      |       |     |         |     |       |     |        |     |       |     |       |     |       |      |       |     |         |        |       |      |       |     |       |      |         |        |        |     |       |         |        |     |       |          |        |     |       |        |        |      |       |         |                                                                                                                                                                                                                                                                                                                                                                                                                                                                                                                                          |            |           |        |           |            |            |           |              |             |            |                                          |               |                 |                                               |                            |
| 223.030                                                                                                                                                                                                                                                                                                                                                                                                                                                                                                                                                                                                                                                                                                                                                                                                                                                                                                                                                                                                                                                                                                                                                                                                                                                                                                                          | 54%                          | 4.570   | Lip13a        |        |                          |      |        |        |                        |        |        |       |                                                  |        |        |               |                                   |      |       |     |                    |      |         |     |           |      |       |     |           |     |       |     |            |     |       |     |       |      |       |     |         |     |       |     |        |     |       |     |       |     |       |      |       |     |         |        |       |      |       |     |       |      |         |        |        |     |       |         |        |     |       |          |        |     |       |        |        |      |       |         |                                                                                                                                                                                                                                                                                                                                                                                                                                                                                                                                          |            |           |        |           |            |            |           |              |             |            |                                          |               |                 |                                               |                            |
| 0.000                                                                                                                                                                                                                                                                                                                                                                                                                                                                                                                                                                                                                                                                                                                                                                                                                                                                                                                                                                                                                                                                                                                                                                                                                                                                                                                            | 999%                         | 0.000   | Lip13b        |        |                          |      |        |        |                        |        |        |       |                                                  |        |        |               |                                   |      |       |     |                    |      |         |     |           |      |       |     |           |     |       |     |            |     |       |     |       |      |       |     |         |     |       |     |        |     |       |     |       |     |       |      |       |     |         |        |       |      |       |     |       |      |         |        |        |     |       |         |        |     |       |          |        |     |       |        |        |      |       |         |                                                                                                                                                                                                                                                                                                                                                                                                                                                                                                                                          |            |           |        |           |            |            |           |              |             |            |                                          |               |                 |                                               |                            |
| 41.348                                                                                                                                                                                                                                                                                                                                                                                                                                                                                                                                                                                                                                                                                                                                                                                                                                                                                                                                                                                                                                                                                                                                                                                                                                                                                                                           | 100%                         | 0.847   | Lip20         |        |                          |      |        |        |                        |        |        |       |                                                  |        |        |               |                                   |      |       |     |                    |      |         |     |           |      |       |     |           |     |       |     |            |     |       |     |       |      |       |     |         |     |       |     |        |     |       |     |       |     |       |      |       |     |         |        |       |      |       |     |       |      |         |        |        |     |       |         |        |     |       |          |        |     |       |        |        |      |       |         |                                                                                                                                                                                                                                                                                                                                                                                                                                                                                                                                          |            |           |        |           |            |            |           |              |             |            |                                          |               |                 |                                               |                            |
| 223.030                                                                                                                                                                                                                                                                                                                                                                                                                                                                                                                                                                                                                                                                                                                                                                                                                                                                                                                                                                                                                                                                                                                                                                                                                                                                                                                          | 54%                          | 4.570   | Lip13a+Lip13b |        |                          |      |        |        |                        |        |        |       |                                                  |        |        |               |                                   |      |       |     |                    |      |         |     |           |      |       |     |           |     |       |     |            |     |       |     |       |      |       |     |         |     |       |     |        |     |       |     |       |     |       |      |       |     |         |        |       |      |       |     |       |      |         |        |        |     |       |         |        |     |       |          |        |     |       |        |        |      |       |         |                                                                                                                                                                                                                                                                                                                                                                                                                                                                                                                                          |            |           |        |           |            |            |           |              |             |            |                                          |               |                 |                                               |                            |
| <table><tr><th colspan="4">DIAGNOSTICS</th></tr><tr><td>1</td><td>info</td><td>STARTV</td><td>24</td></tr><tr><td>2</td><td>info's</td><td>TWOREG</td><td>8</td></tr><tr><td>3</td><td>info's</td><td>RFALSI</td><td>11</td></tr></table>                                                                                                                                                                                                                                                                                                                                                                                                                                                                                                                                                                                                                                                                                                                                                                                                                                                                                                                                                                                                                                                                                        | DIAGNOSTICS                  |         |               |        | 1                        | info | STARTV | 24     | 2                      | info's | TWOREG | 8     | 3                                                | info's | RFALSI | 11            |                                   |      |       |     |                    |      |         |     |           |      |       |     |           |     |       |     |            |     |       |     |       |      |       |     |         |     |       |     |        |     |       |     |       |     |       |      |       |     |         |        |       |      |       |     |       |      |         |        |        |     |       |         |        |     |       |          |        |     |       |        |        |      |       |         |                                                                                                                                                                                                                                                                                                                                                                                                                                                                                                                                          |            |           |        |           |            |            |           |              |             |            |                                          |               |                 |                                               |                            |
| DIAGNOSTICS                                                                                                                                                                                                                                                                                                                                                                                                                                                                                                                                                                                                                                                                                                                                                                                                                                                                                                                                                                                                                                                                                                                                                                                                                                                                                                                      |                              |         |               |        |                          |      |        |        |                        |        |        |       |                                                  |        |        |               |                                   |      |       |     |                    |      |         |     |           |      |       |     |           |     |       |     |            |     |       |     |       |      |       |     |         |     |       |     |        |     |       |     |       |     |       |      |       |     |         |        |       |      |       |     |       |      |         |        |        |     |       |         |        |     |       |          |        |     |       |        |        |      |       |         |                                                                                                                                                                                                                                                                                                                                                                                                                                                                                                                                          |            |           |        |           |            |            |           |              |             |            |                                          |               |                 |                                               |                            |
| 1                                                                                                                                                                                                                                                                                                                                                                                                                                                                                                                                                                                                                                                                                                                                                                                                                                                                                                                                                                                                                                                                                                                                                                                                                                                                                                                                | info                         | STARTV  | 24            |        |                          |      |        |        |                        |        |        |       |                                                  |        |        |               |                                   |      |       |     |                    |      |         |     |           |      |       |     |           |     |       |     |            |     |       |     |       |      |       |     |         |     |       |     |        |     |       |     |       |     |       |      |       |     |         |        |       |      |       |     |       |      |         |        |        |     |       |         |        |     |       |          |        |     |       |        |        |      |       |         |                                                                                                                                                                                                                                                                                                                                                                                                                                                                                                                                          |            |           |        |           |            |            |           |              |             |            |                                          |               |                 |                                               |                            |
| 2                                                                                                                                                                                                                                                                                                                                                                                                                                                                                                                                                                                                                                                                                                                                                                                                                                                                                                                                                                                                                                                                                                                                                                                                                                                                                                                                | info's                       | TWOREG  | 8             |        |                          |      |        |        |                        |        |        |       |                                                  |        |        |               |                                   |      |       |     |                    |      |         |     |           |      |       |     |           |     |       |     |            |     |       |     |       |      |       |     |         |     |       |     |        |     |       |     |       |     |       |      |       |     |         |        |       |      |       |     |       |      |         |        |        |     |       |         |        |     |       |          |        |     |       |        |        |      |       |         |                                                                                                                                                                                                                                                                                                                                                                                                                                                                                                                                          |            |           |        |           |            |            |           |              |             |            |                                          |               |                 |                                               |                            |
| 3                                                                                                                                                                                                                                                                                                                                                                                                                                                                                                                                                                                                                                                                                                                                                                                                                                                                                                                                                                                                                                                                                                                                                                                                                                                                                                                                | info's                       | RFALSI  | 11            |        |                          |      |        |        |                        |        |        |       |                                                  |        |        |               |                                   |      |       |     |                    |      |         |     |           |      |       |     |           |     |       |     |            |     |       |     |       |      |       |     |         |     |       |     |        |     |       |     |       |     |       |      |       |     |         |        |       |      |       |     |       |      |         |        |        |     |       |         |        |     |       |          |        |     |       |        |        |      |       |         |                                                                                                                                                                                                                                                                                                                                                                                                                                                                                                                                          |            |           |        |           |            |            |           |              |             |            |                                          |               |                 |                                               |                            |
| <table><tr><th colspan="4">MISCELLANEOUS OUTPUT</th></tr><tr><td colspan="4">FWHM = 0.107 ppm S/N = 2</td></tr><tr><td colspan="4">Data shift = 0.061 ppm</td></tr><tr><td colspan="4">Ph: 19 deg 1.4 deg/ppm</td></tr></table>                                                                                                                                                                                                                                                                                                                                                                                                                                                                                                                                                                                                                                                                                                                                                                                                                                                                                                                                                                                                                                                                                                  | MISCELLANEOUS OUTPUT         |         |               |        | FWHM = 0.107 ppm S/N = 2 |      |        |        | Data shift = 0.061 ppm |        |        |       | Ph: 19 deg 1.4 deg/ppm                           |        |        |               |                                   |      |       |     |                    |      |         |     |           |      |       |     |           |     |       |     |            |     |       |     |       |      |       |     |         |     |       |     |        |     |       |     |       |     |       |      |       |     |         |        |       |      |       |     |       |      |         |        |        |     |       |         |        |     |       |          |        |     |       |        |        |      |       |         |                                                                                                                                                                                                                                                                                                                                                                                                                                                                                                                                          |            |           |        |           |            |            |           |              |             |            |                                          |               |                 |                                               |                            |
| MISCELLANEOUS OUTPUT                                                                                                                                                                                                                                                                                                                                                                                                                                                                                                                                                                                                                                                                                                                                                                                                                                                                                                                                                                                                                                                                                                                                                                                                                                                                                                             |                              |         |               |        |                          |      |        |        |                        |        |        |       |                                                  |        |        |               |                                   |      |       |     |                    |      |         |     |           |      |       |     |           |     |       |     |            |     |       |     |       |      |       |     |         |     |       |     |        |     |       |     |       |     |       |      |       |     |         |        |       |      |       |     |       |      |         |        |        |     |       |         |        |     |       |          |        |     |       |        |        |      |       |         |                                                                                                                                                                                                                                                                                                                                                                                                                                                                                                                                          |            |           |        |           |            |            |           |              |             |            |                                          |               |                 |                                               |                            |
| FWHM = 0.107 ppm S/N = 2                                                                                                                                                                                                                                                                                                                                                                                                                                                                                                                                                                                                                                                                                                                                                                                                                                                                                                                                                                                                                                                                                                                                                                                                                                                                                                         |                              |         |               |        |                          |      |        |        |                        |        |        |       |                                                  |        |        |               |                                   |      |       |     |                    |      |         |     |           |      |       |     |           |     |       |     |            |     |       |     |       |      |       |     |         |     |       |     |        |     |       |     |       |     |       |      |       |     |         |        |       |      |       |     |       |      |         |        |        |     |       |         |        |     |       |          |        |     |       |        |        |      |       |         |                                                                                                                                                                                                                                                                                                                                                                                                                                                                                                                                          |            |           |        |           |            |            |           |              |             |            |                                          |               |                 |                                               |                            |
| Data shift = 0.061 ppm                                                                                                                                                                                                                                                                                                                                                                                                                                                                                                                                                                                                                                                                                                                                                                                                                                                                                                                                                                                                                                                                                                                                                                                                                                                                                                           |                              |         |               |        |                          |      |        |        |                        |        |        |       |                                                  |        |        |               |                                   |      |       |     |                    |      |         |     |           |      |       |     |           |     |       |     |            |     |       |     |       |      |       |     |         |     |       |     |        |     |       |     |       |     |       |      |       |     |         |        |       |      |       |     |       |      |         |        |        |     |       |         |        |     |       |          |        |     |       |        |        |      |       |         |                                                                                                                                                                                                                                                                                                                                                                                                                                                                                                                                          |            |           |        |           |            |            |           |              |             |            |                                          |               |                 |                                               |                            |
| Ph: 19 deg 1.4 deg/ppm                                                                                                                                                                                                                                                                                                                                                                                                                                                                                                                                                                                                                                                                                                                                                                                                                                                                                                                                                                                                                                                                                                                                                                                                                                                                                                           |                              |         |               |        |                          |      |        |        |                        |        |        |       |                                                  |        |        |               |                                   |      |       |     |                    |      |         |     |           |      |       |     |           |     |       |     |            |     |       |     |       |      |       |     |         |     |       |     |        |     |       |     |       |     |       |      |       |     |         |        |       |      |       |     |       |      |         |        |        |     |       |         |        |     |       |          |        |     |       |        |        |      |       |         |                                                                                                                                                                                                                                                                                                                                                                                                                                                                                                                                          |            |           |        |           |            |            |           |              |             |            |                                          |               |                 |                                               |                            |
| <table><tr><th colspan="4">INPUT CHANGES</th></tr><tr><td colspan="4">deltat= 5.000e-04</td></tr><tr><td colspan="4">echot= 288.00</td></tr><tr><td colspan="4">filbas= '/home/stu111733/.lcmodel/basis-sets/gam</td></tr><tr><td colspan="4">ma_press_te288_128mhz_662d.basis'</td></tr><tr><td colspan="4">hzpppm= 1.2776e+02</td></tr><tr><td colspan="4">icolen= 9</td></tr><tr><td colspan="4">icolst= 7</td></tr><tr><td colspan="4">irowen= 20</td></tr></table>                                                                                                                                                                                                                                                                                                                                                                                                                                                                                                                                                                                                                                                                                                                                                                                                                                                          | INPUT CHANGES                |         |               |        | deltat= 5.000e-04        |      |        |        | echot= 288.00          |        |        |       | filbas= '/home/stu111733/.lcmodel/basis-sets/gam |        |        |               | ma_press_te288_128mhz_662d.basis' |      |       |     | hzpppm= 1.2776e+02 |      |         |     | icolen= 9 |      |       |     | icolst= 7 |     |       |     | irowen= 20 |     |       |     |       |      |       |     |         |     |       |     |        |     |       |     |       |     |       |      |       |     |         |        |       |      |       |     |       |      |         |        |        |     |       |         |        |     |       |          |        |     |       |        |        |      |       |         |                                                                                                                                                                                                                                                                                                                                                                                                                                                                                                                                          |            |           |        |           |            |            |           |              |             |            |                                          |               |                 |                                               |                            |
| INPUT CHANGES                                                                                                                                                                                                                                                                                                                                                                                                                                                                                                                                                                                                                                                                                                                                                                                                                                                                                                                                                                                                                                                                                                                                                                                                                                                                                                                    |                              |         |               |        |                          |      |        |        |                        |        |        |       |                                                  |        |        |               |                                   |      |       |     |                    |      |         |     |           |      |       |     |           |     |       |     |            |     |       |     |       |      |       |     |         |     |       |     |        |     |       |     |       |     |       |      |       |     |         |        |       |      |       |     |       |      |         |        |        |     |       |         |        |     |       |          |        |     |       |        |        |      |       |         |                                                                                                                                                                                                                                                                                                                                                                                                                                                                                                                                          |            |           |        |           |            |            |           |              |             |            |                                          |               |                 |                                               |                            |
| deltat= 5.000e-04                                                                                                                                                                                                                                                                                                                                                                                                                                                                                                                                                                                                                                                                                                                                                                                                                                                                                                                                                                                                                                                                                                                                                                                                                                                                                                                |                              |         |               |        |                          |      |        |        |                        |        |        |       |                                                  |        |        |               |                                   |      |       |     |                    |      |         |     |           |      |       |     |           |     |       |     |            |     |       |     |       |      |       |     |         |     |       |     |        |     |       |     |       |     |       |      |       |     |         |        |       |      |       |     |       |      |         |        |        |     |       |         |        |     |       |          |        |     |       |        |        |      |       |         |                                                                                                                                                                                                                                                                                                                                                                                                                                                                                                                                          |            |           |        |           |            |            |           |              |             |            |                                          |               |                 |                                               |                            |
| echot= 288.00                                                                                                                                                                                                                                                                                                                                                                                                                                                                                                                                                                                                                                                                                                                                                                                                                                                                                                                                                                                                                                                                                                                                                                                                                                                                                                                    |                              |         |               |        |                          |      |        |        |                        |        |        |       |                                                  |        |        |               |                                   |      |       |     |                    |      |         |     |           |      |       |     |           |     |       |     |            |     |       |     |       |      |       |     |         |     |       |     |        |     |       |     |       |     |       |      |       |     |         |        |       |      |       |     |       |      |         |        |        |     |       |         |        |     |       |          |        |     |       |        |        |      |       |         |                                                                                                                                                                                                                                                                                                                                                                                                                                                                                                                                          |            |           |        |           |            |            |           |              |             |            |                                          |               |                 |                                               |                            |
| filbas= '/home/stu111733/.lcmodel/basis-sets/gam                                                                                                                                                                                                                                                                                                                                                                                                                                                                                                                                                                                                                                                                                                                                                                                                                                                                                                                                                                                                                                                                                                                                                                                                                                                                                 |                              |         |               |        |                          |      |        |        |                        |        |        |       |                                                  |        |        |               |                                   |      |       |     |                    |      |         |     |           |      |       |     |           |     |       |     |            |     |       |     |       |      |       |     |         |     |       |     |        |     |       |     |       |     |       |      |       |     |         |        |       |      |       |     |       |      |         |        |        |     |       |         |        |     |       |          |        |     |       |        |        |      |       |         |                                                                                                                                                                                                                                                                                                                                                                                                                                                                                                                                          |            |           |        |           |            |            |           |              |             |            |                                          |               |                 |                                               |                            |
| ma_press_te288_128mhz_662d.basis'                                                                                                                                                                                                                                                                                                                                                                                                                                                                                                                                                                                                                                                                                                                                                                                                                                                                                                                                                                                                                                                                                                                                                                                                                                                                                                |                              |         |               |        |                          |      |        |        |                        |        |        |       |                                                  |        |        |               |                                   |      |       |     |                    |      |         |     |           |      |       |     |           |     |       |     |            |     |       |     |       |      |       |     |         |     |       |     |        |     |       |     |       |     |       |      |       |     |         |        |       |      |       |     |       |      |         |        |        |     |       |         |        |     |       |          |        |     |       |        |        |      |       |         |                                                                                                                                                                                                                                                                                                                                                                                                                                                                                                                                          |            |           |        |           |            |            |           |              |             |            |                                          |               |                 |                                               |                            |
| hzpppm= 1.2776e+02                                                                                                                                                                                                                                                                                                                                                                                                                                                                                                                                                                                                                                                                                                                                                                                                                                                                                                                                                                                                                                                                                                                                                                                                                                                                                                               |                              |         |               |        |                          |      |        |        |                        |        |        |       |                                                  |        |        |               |                                   |      |       |     |                    |      |         |     |           |      |       |     |           |     |       |     |            |     |       |     |       |      |       |     |         |     |       |     |        |     |       |     |       |     |       |      |       |     |         |        |       |      |       |     |       |      |         |        |        |     |       |         |        |     |       |          |        |     |       |        |        |      |       |         |                                                                                                                                                                                                                                                                                                                                                                                                                                                                                                                                          |            |           |        |           |            |            |           |              |             |            |                                          |               |                 |                                               |                            |
| icolen= 9                                                                                                                                                                                                                                                                                                                                                                                                                                                                                                                                                                                                                                                                                                                                                                                                                                                                                                                                                                                                                                                                                                                                                                                                                                                                                                                        |                              |         |               |        |                          |      |        |        |                        |        |        |       |                                                  |        |        |               |                                   |      |       |     |                    |      |         |     |           |      |       |     |           |     |       |     |            |     |       |     |       |      |       |     |         |     |       |     |        |     |       |     |       |     |       |      |       |     |         |        |       |      |       |     |       |      |         |        |        |     |       |         |        |     |       |          |        |     |       |        |        |      |       |         |                                                                                                                                                                                                                                                                                                                                                                                                                                                                                                                                          |            |           |        |           |            |            |           |              |             |            |                                          |               |                 |                                               |                            |
| icolst= 7                                                                                                                                                                                                                                                                                                                                                                                                                                                                                                                                                                                                                                                                                                                                                                                                                                                                                                                                                                                                                                                                                                                                                                                                                                                                                                                        |                              |         |               |        |                          |      |        |        |                        |        |        |       |                                                  |        |        |               |                                   |      |       |     |                    |      |         |     |           |      |       |     |           |     |       |     |            |     |       |     |       |      |       |     |         |     |       |     |        |     |       |     |       |     |       |      |       |     |         |        |       |      |       |     |       |      |         |        |        |     |       |         |        |     |       |          |        |     |       |        |        |      |       |         |                                                                                                                                                                                                                                                                                                                                                                                                                                                                                                                                          |            |           |        |           |            |            |           |              |             |            |                                          |               |                 |                                               |                            |
| irowen= 20                                                                                                                                                                                                                                                                                                                                                                                                                                                                                                                                                                                                                                                                                                                                                                                                                                                                                                                                                                                                                                                                                                                                                                                                                                                                                                                       |                              |         |               |        |                          |      |        |        |                        |        |        |       |                                                  |        |        |               |                                   |      |       |     |                    |      |         |     |           |      |       |     |           |     |       |     |            |     |       |     |       |      |       |     |         |     |       |     |        |     |       |     |       |     |       |      |       |     |         |        |       |      |       |     |       |      |         |        |        |     |       |         |        |     |       |          |        |     |       |        |        |      |       |         |                                                                                                                                                                                                                                                                                                                                                                                                                                                                                                                                          |            |           |        |           |            |            |           |              |             |            |                                          |               |                 |                                               |                            |

P12 - edema  
voxel 19;10

Row#19 Col#10 MR Spektroskopie (2018.11.20 09:44:02) Subject 01 8.00e-01 mL, TE/TR/NS=288/1500/1 (s2DSI\_TE288 TR1500)

Data of: Sektion Biomedizinische Bildgebung, Christian-Albrechts-Universitaet zu Kiel

LCModel (Version 6.3-1J) Copyright: S.W. Provencher.

Ref.: Magn. Reson. Med. 30:672-679 (1993).

26-November-2019 17:23

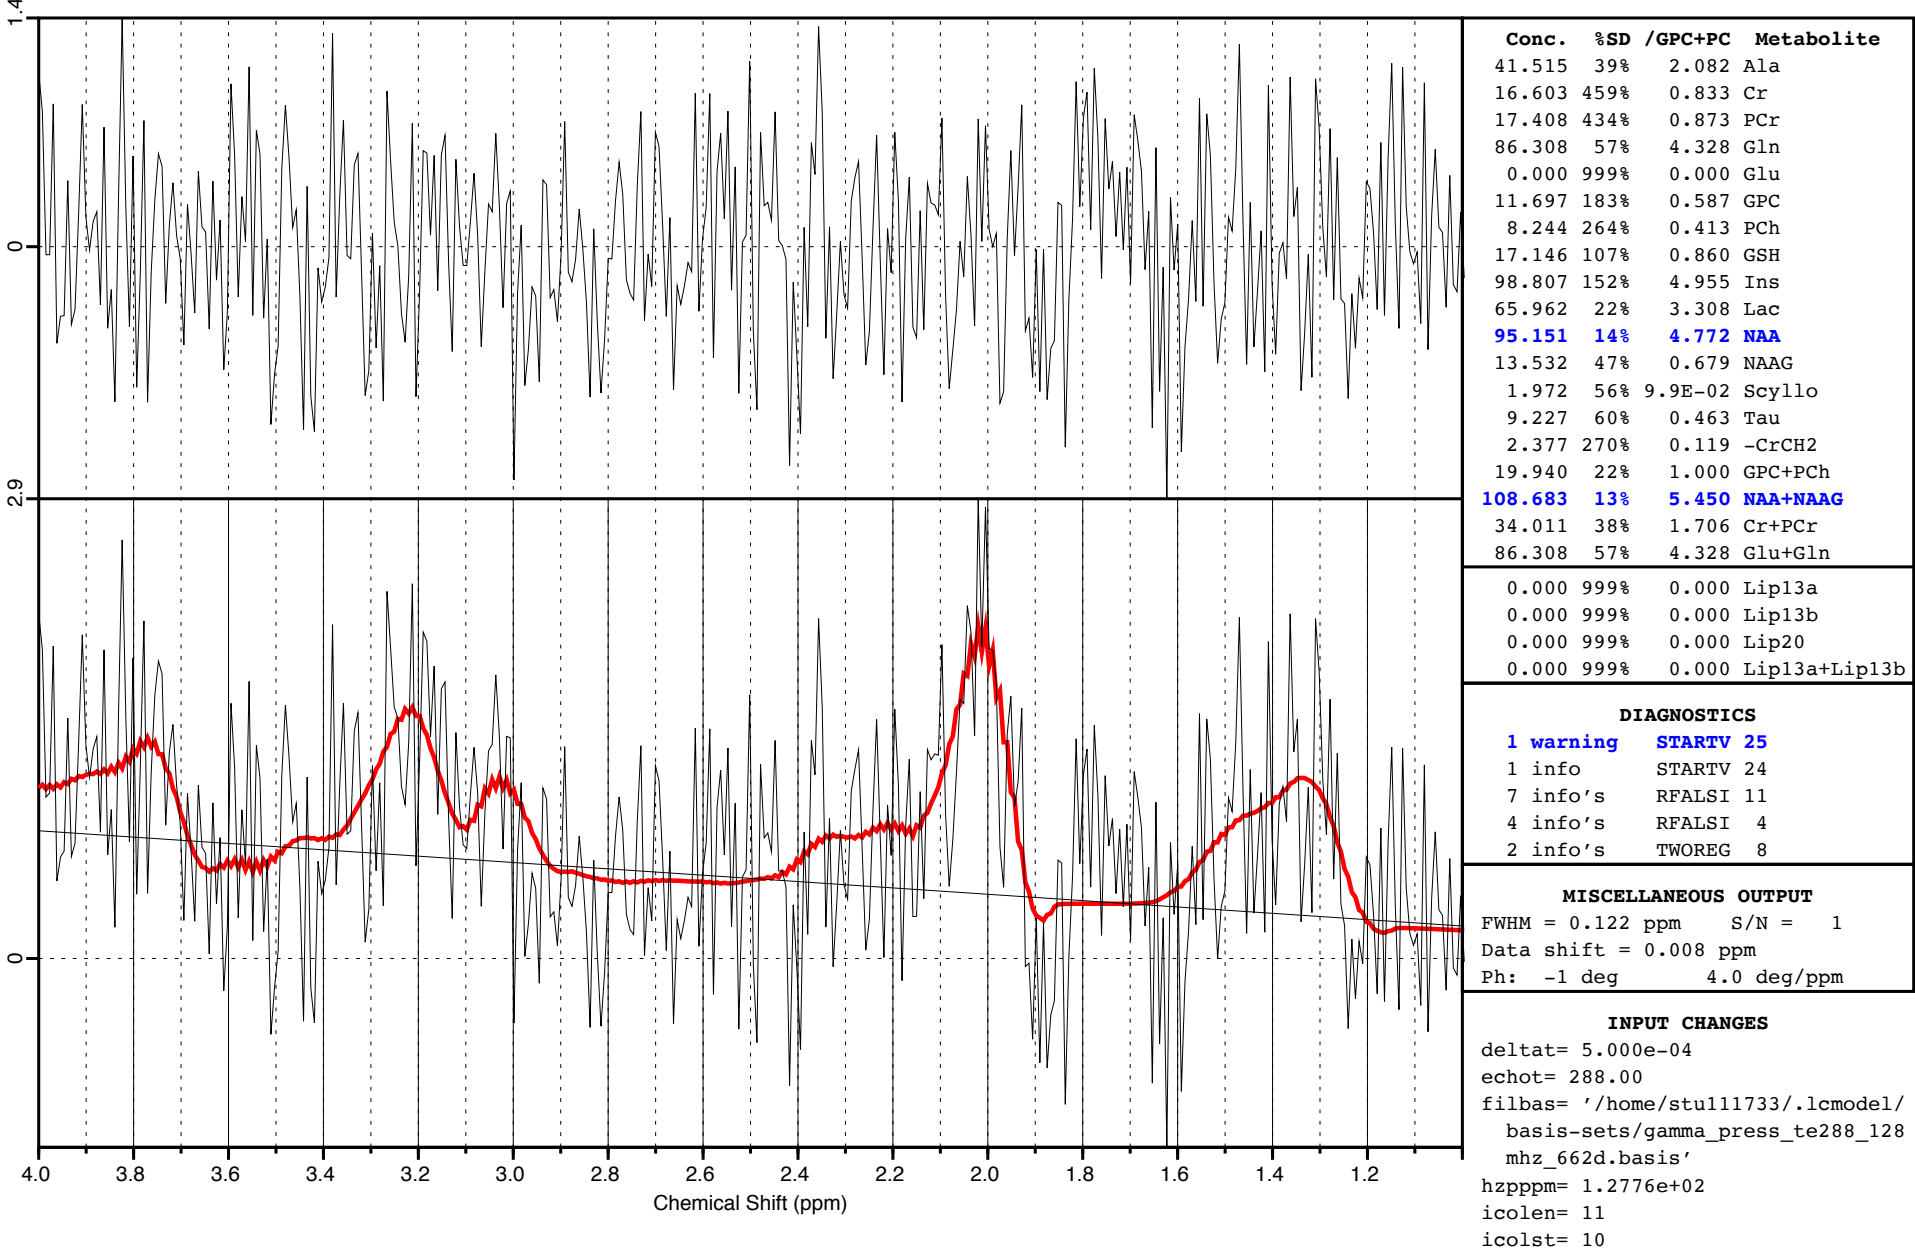

Row#19 Col#10 MR Spektroskopie (2018.11.20 09:44:02) Subject 01 8.00e-01 mL, TE/TR/NS=288/1500/1 (s2DSI\_TE288 TR1500)

Data of: *Sektion Biomedizinische Bildgebung, Christian-Albrechts-Universitaet zu Kiel*

LCModel (Version 6.3-1J) Copyright: S.W. Provencher.

Ref.: *Magn. Reson. Med. 30:672-679 (1993).*

26-November-2019 17:23

|                                                                                                                                                                                                                                                                                                                                                                                                                                                                                                                                                                                                                                                                                                                                                                                                                                                                                                                                                                                                                                                                                                                                                                                                                                                                                                                                                                                                                 |                                                                                                                                                                                                                                                                                                                                                                                                                                                                                   |
|-----------------------------------------------------------------------------------------------------------------------------------------------------------------------------------------------------------------------------------------------------------------------------------------------------------------------------------------------------------------------------------------------------------------------------------------------------------------------------------------------------------------------------------------------------------------------------------------------------------------------------------------------------------------------------------------------------------------------------------------------------------------------------------------------------------------------------------------------------------------------------------------------------------------------------------------------------------------------------------------------------------------------------------------------------------------------------------------------------------------------------------------------------------------------------------------------------------------------------------------------------------------------------------------------------------------------------------------------------------------------------------------------------------------|-----------------------------------------------------------------------------------------------------------------------------------------------------------------------------------------------------------------------------------------------------------------------------------------------------------------------------------------------------------------------------------------------------------------------------------------------------------------------------------|
| <div><div><div><div><div>Conc.</div><div>%SD</div><div>/GPC+PC</div><div>Metabolite</div></div><div>41.51539%2.082Ala</div><div>16.603459%0.833Cr</div><div>17.408434%0.873PCr</div><div>86.30857%4.328Gln</div><div>0.000999%0.000Glu</div><div>11.697183%0.587GPC</div><div>8.244264%0.413PCh</div><div>17.146107%0.860GSH</div><div>98.807152%4.955Ins</div><div>65.96222%3.308Lac</div><div>95.15114%4.772NAA</div><div>13.53247%0.679NAAG</div><div>1.97256%9.9E-02Scyllo</div><div>9.22760%0.463Tau</div><div>2.377270%0.119-CrCH2</div><div>19.94022%1.000GPC+PCh</div><div>108.68313%5.450NAA+NAAG</div><div>34.01138%1.706Cr+PCr</div><div>86.30857%4.328Glu+Gln</div></div><div><div>0.000999%0.000Lip13a</div><div>0.000999%0.000Lip13b</div><div>0.000999%0.000Lip20</div><div>0.000999%0.000Lip13a+Lip13b</div></div><div><div>DIAGNOSTICS</div><div>1 warningSTARTV 25</div><div>1 infoSTARTV 24</div><div>7 info'sRFALSI 11</div><div>4 info'sRFALSI 4</div><div>2 info'sTWOREG 8</div></div><div><div>MISCELLANEOUS OUTPUT</div><div>FWHM = 0.122 ppmS/N = 1</div><div>Data shift = 0.008 ppm</div><div>Ph: -1 deg4.0 deg/ppm</div></div><div><div>INPUT CHANGES</div><div>deltat= 5.000e-04</div><div>echot= 288.00</div><div>filbas= '/home/stu111733/.lcmodel/basis-sets/gam<br/>ma_press_te288_128mhz_662d.basis'</div><div>hzpppm= 1.2776e+02</div><div>icolen= 11</div></div></div></div> | <div><div>icolst= 10</div><div>irowen= 20</div><div>irowst= 17</div><div>islice= 1</div><div>lps= 8</div><div>ltable= 7</div><div>ndcols= 16</div><div>ndrows= 20</div><div>ndslic= 1</div><div>nunfil= 1024</div><div>ppmend= 1.0</div><div>ppmst= 4.0</div><div>savdir= '/home/stu111733/.lcmodel/saved/MR_Spekt<br/>roskopie/s01/2018.11.20_09:44:02/' sptype=<br/>'tumor'</div><div>srcraw= '/home/data/Studies/GBM_Spektro/data/s01<br/>/DBIEX_5_1_raw_act.SDAT'</div></div> |
|-----------------------------------------------------------------------------------------------------------------------------------------------------------------------------------------------------------------------------------------------------------------------------------------------------------------------------------------------------------------------------------------------------------------------------------------------------------------------------------------------------------------------------------------------------------------------------------------------------------------------------------------------------------------------------------------------------------------------------------------------------------------------------------------------------------------------------------------------------------------------------------------------------------------------------------------------------------------------------------------------------------------------------------------------------------------------------------------------------------------------------------------------------------------------------------------------------------------------------------------------------------------------------------------------------------------------------------------------------------------------------------------------------------------|-----------------------------------------------------------------------------------------------------------------------------------------------------------------------------------------------------------------------------------------------------------------------------------------------------------------------------------------------------------------------------------------------------------------------------------------------------------------------------------|



P15 - tumor  
voxel 10;4

Row#10 Col#4 MR Hirn (2019.01.04 14:00:10) Subject 06 6.30e-01 mL, TE/TR/NS=288/1500/4 (s2DSI\_TE288 TR1500)

Data of: Sektion Biomedizinische Bildgebung, Christian-Albrechts-Universitaet zu Kiel

LCModel (Version 6.3-1J) Copyright: S.W. Provencher.

Ref.: Magn. Reson. Med. 30:672-679 (1993).

13-June-2019 10:47

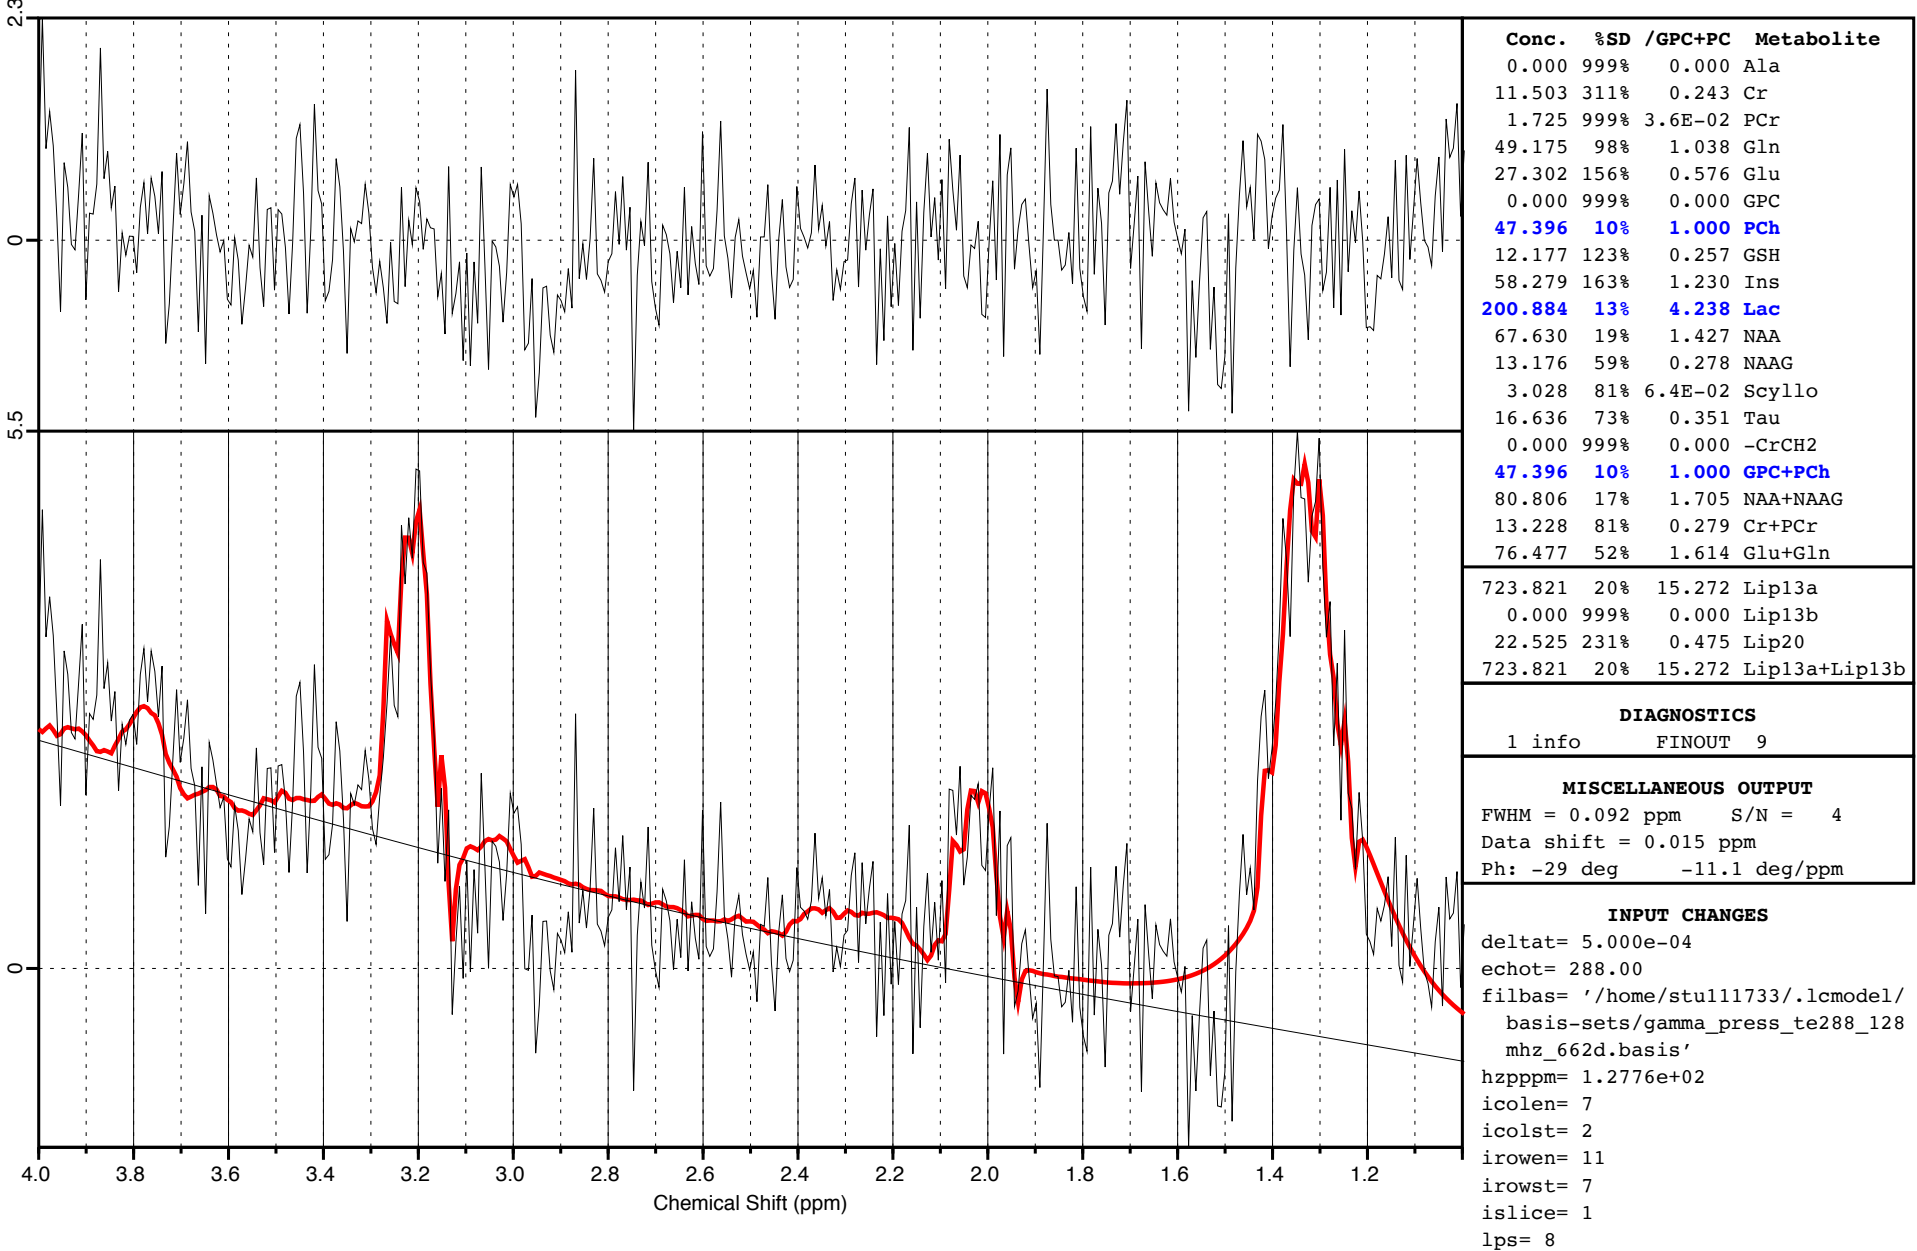

Row#10 Col#4 MR Hirn (2019.01.04 14:00:10) Subject 06 6.30e-01 mL, TE/TR/NS=288/1500/4 (s2DSI\_TE288 TR1500)

Data of: *Sektion Biomedizinische Bildgebung, Christian-Albrechts-Universitaet zu Kiel*

LCModel (Version 6.3-1J) Copyright: S.W. Provencher.      Ref.: Magn. Reson. Med. 30:672-679 (1993).

13-June-2019 10:47

|                                                                                                                                                                                                                                                                                                                                                                                                                                                                                                                                                                                                                                                                                                                                                                                                                                                                             |                                                                                                                                                                                                                                                                                                                                                                                        |
|-----------------------------------------------------------------------------------------------------------------------------------------------------------------------------------------------------------------------------------------------------------------------------------------------------------------------------------------------------------------------------------------------------------------------------------------------------------------------------------------------------------------------------------------------------------------------------------------------------------------------------------------------------------------------------------------------------------------------------------------------------------------------------------------------------------------------------------------------------------------------------|----------------------------------------------------------------------------------------------------------------------------------------------------------------------------------------------------------------------------------------------------------------------------------------------------------------------------------------------------------------------------------------|
| <div><div><div><div><div>Conc.</div><div>%SD</div><div>/GPC+PC</div><div>Metabolite</div></div><div>0.000999%0.000Ala</div><div>11.503311%0.243Cr</div><div>1.725999%3.6E-02PCr</div><div>49.17598%1.038Gln</div><div>27.302156%0.576Glu</div><div>0.000999%0.000GPC</div><div>47.39610%1.000PCh</div><div>12.177123%0.257GSH</div><div>58.279163%1.230Ins</div><div>200.88413%4.238Lac</div><div>67.63019%1.427NAA</div><div>13.17659%0.278NAAG</div><div>3.02881%6.4E-02Scyllo</div><div>16.63673%0.351Tau</div><div>0.000999%0.000-CrCH2</div><div>47.39610%1.000GPC+PCh</div><div>80.80617%1.705NAA+NAAG</div><div>13.22881%0.279Cr+PCr</div><div>76.47752%1.614Glu+Gln</div></div></div><div><div><div><div>723.82120%15.272Lip13a</div><div>0.000999%0.000Lip13b</div><div>22.525231%0.475Lip20</div><div>723.82120%15.272Lip13a+Lip13b</div></div></div></div></div> | <div><div><div><div>lps= 8</div><div>ltable= 7</div><div>ndcols= 12</div><div>ndrows= 14</div><div>ndslic= 1</div><div>nunfil= 1024</div><div>ppmend= 1.0</div><div>ppmst= 4.0</div><div>savdir= '/home/data/Studies/GBM_Spektro/results/'</div><div>sptype= 'tumor'</div><div>srcraw= '/home/data/Studies/GBM_Spektro/data/</div><div>DBIEX_7_1_raw_act.SDAT'</div></div></div></div> |
| <div><div><div><div>DIAGNOSTICS</div><div>1 infoFINOUT 9</div></div></div></div>                                                                                                                                                                                                                                                                                                                                                                                                                                                                                                                                                                                                                                                                                                                                                                                            |                                                                                                                                                                                                                                                                                                                                                                                        |
| <div><div><div><div>MISCELLANEOUS OUTPUT</div><div>FWHM = 0.092 ppmS/N = 4</div><div>Data shift = 0.015 ppm</div><div>Ph: -29 deg-11.1 deg/ppm</div></div></div></div>                                                                                                                                                                                                                                                                                                                                                                                                                                                                                                                                                                                                                                                                                                      |                                                                                                                                                                                                                                                                                                                                                                                        |
| <div><div><div><div>INPUT CHANGES</div><div>deltat= 5.000e-04</div><div>echot= 288.00</div><div>filbas= '/home/stu11733/.lcmmodel/basis-sets/gam</div><div>ma_press_te288_128mhz_662d.basis'</div><div>hzpppm= 1.2776e+02</div><div>icolen= 7</div><div>icolst= 2</div><div>irowen= 11</div><div>irowst= 7</div><div>islice= 1</div></div></div></div>                                                                                                                                                                                                                                                                                                                                                                                                                                                                                                                      |                                                                                                                                                                                                                                                                                                                                                                                        |

P15 - edema  
voxel 11;3

Row#11 Col#3 MR Hirn (2019.01.04 14:00:10) Subject 06 6.30e-01 mL, TE/TR/NS=288/1500/4 (s2DSI\_TE288 TR1500)

Data of: *Sektion Biomedizinische Bildgebung, Christian-Albrechts-Universitaet zu Kiel*

LCModel (Version 6.3-1J) Copyright: S.W. Provencher.

Ref.: *Magn. Reson. Med. 30:672-679 (1993).*

13-June-2019 10:48

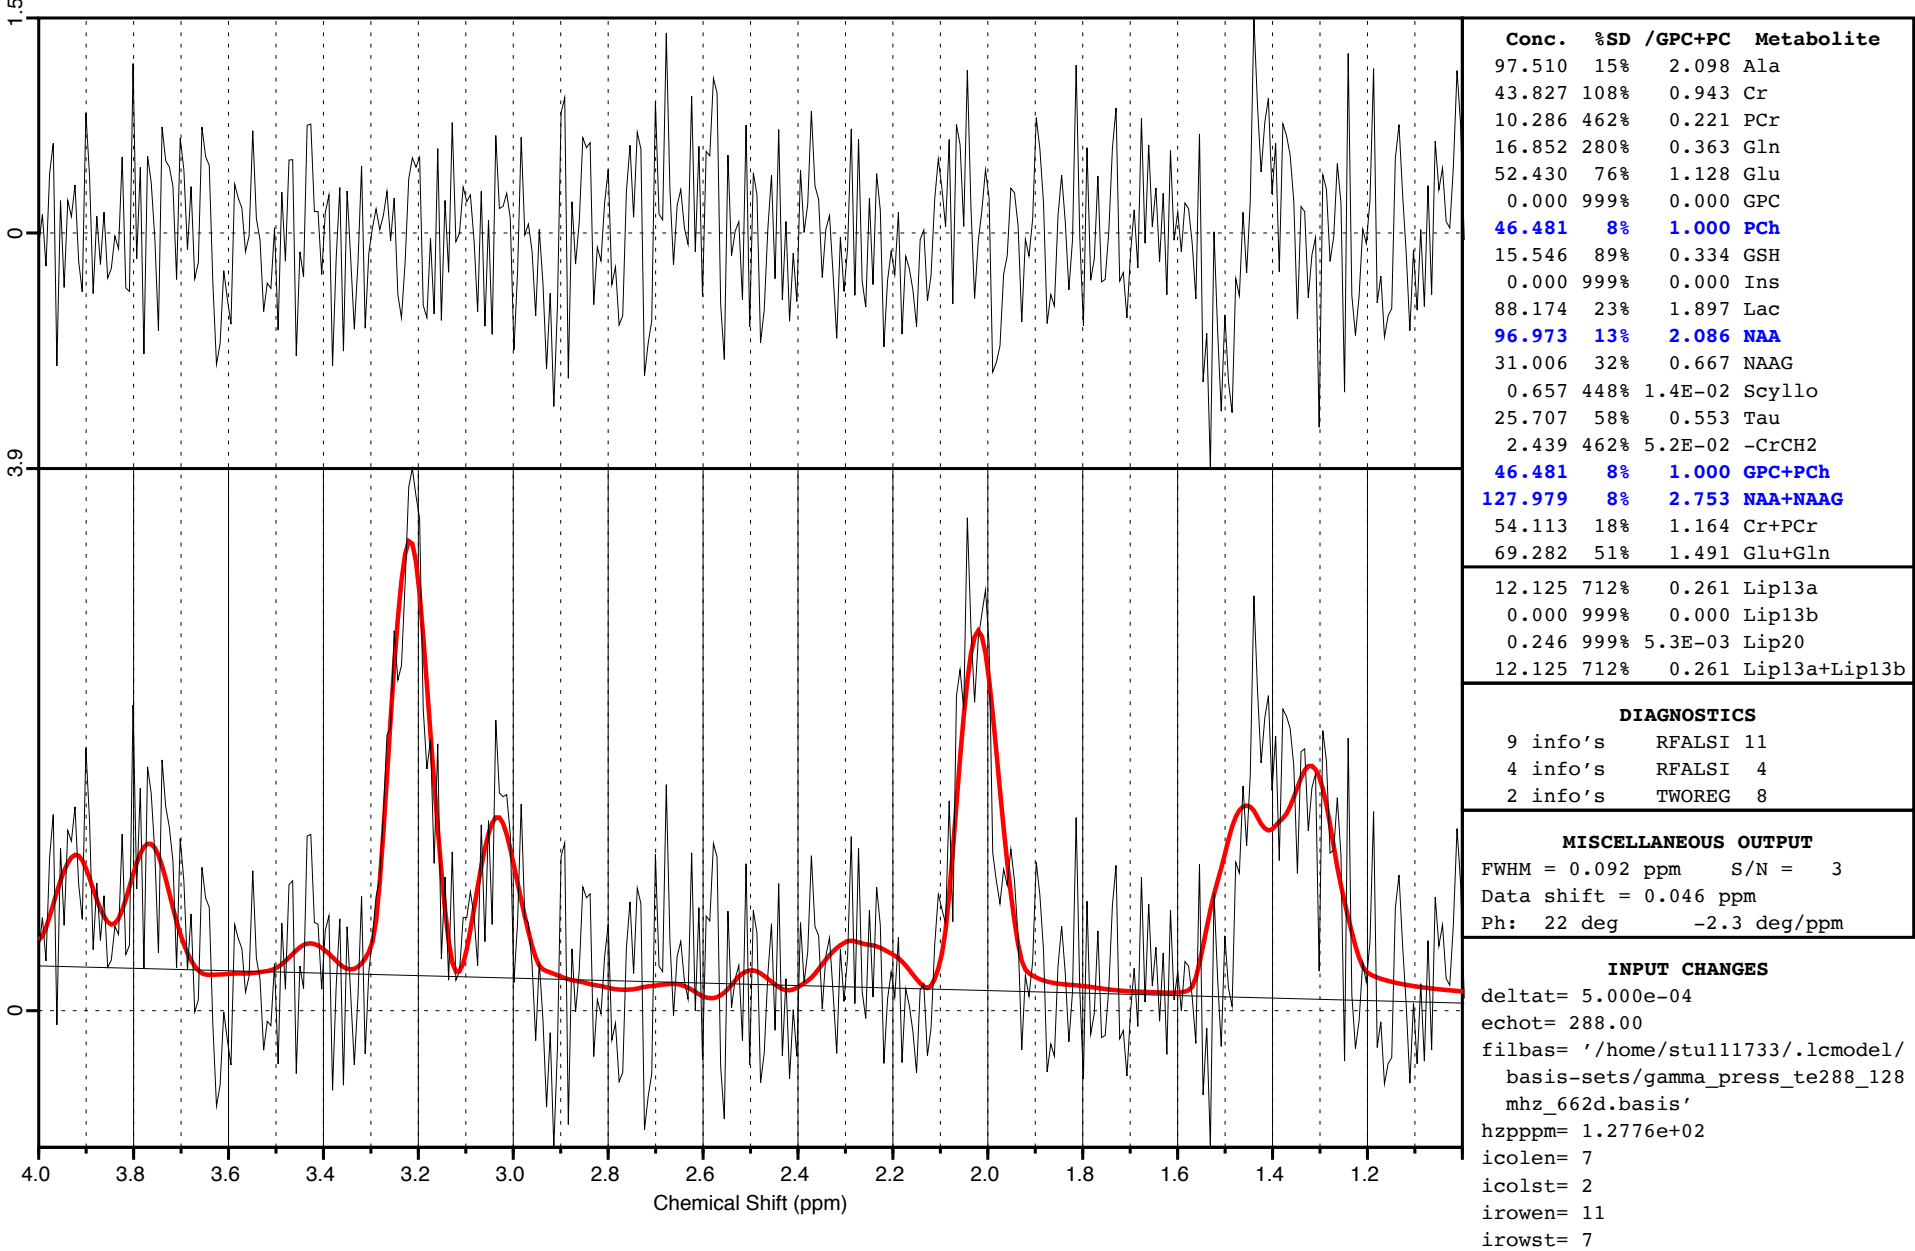

## P15 - edema voxel 11;3

Row#11 Col#3 MR Hirn (2019.01.04 14:00:10) Subject 06 6.30e-01 mL, TE/TR/NS=288/1500/4 (s2DSI\_TE288 TR1500)

Data of: Sektion Biomedizinische Bildgebung, Christian-Albrechts-Universitaet zu Kiel

LCModel (Version 6.3-1J) Copyright: S.W. Provencher.

*Ref.: Magn. Reson. Med. 30:672-679 (1993).*

13-June-2019 10:48

|                                                                                                                                                                                                                                                                                                                                                                                                                                                                                                                                                                                                                                                                                                                                                                                                                                                                                                                                                                                                                                                                                                                                                                                                                                                                                                                                                                                                                                                                                                                                                                                                                                                                                                              |                      |         |               |         |                          |            |        |        |                        |        |         |       |                                                   |        |        |               |                                   |  |        |      |                    |     |  |  |           |      |       |     |           |  |        |     |            |     |  |  |       |      |       |     |  |  |        |    |       |     |  |  |        |     |       |     |  |  |       |      |       |     |  |  |        |     |       |     |  |  |        |     |       |     |  |  |        |     |       |      |  |  |       |      |         |        |  |  |        |     |       |     |  |  |       |      |         |        |  |  |        |    |       |         |  |  |         |    |       |          |  |  |        |     |       |        |  |  |        |     |       |         |  |  |                                                                                                                                                                                                                                                                                                                                                                                                                                                                                                                                    |           |           |        |           |            |            |           |              |             |            |                                                  |   |                 |                                               |                           |
|--------------------------------------------------------------------------------------------------------------------------------------------------------------------------------------------------------------------------------------------------------------------------------------------------------------------------------------------------------------------------------------------------------------------------------------------------------------------------------------------------------------------------------------------------------------------------------------------------------------------------------------------------------------------------------------------------------------------------------------------------------------------------------------------------------------------------------------------------------------------------------------------------------------------------------------------------------------------------------------------------------------------------------------------------------------------------------------------------------------------------------------------------------------------------------------------------------------------------------------------------------------------------------------------------------------------------------------------------------------------------------------------------------------------------------------------------------------------------------------------------------------------------------------------------------------------------------------------------------------------------------------------------------------------------------------------------------------|----------------------|---------|---------------|---------|--------------------------|------------|--------|--------|------------------------|--------|---------|-------|---------------------------------------------------|--------|--------|---------------|-----------------------------------|--|--------|------|--------------------|-----|--|--|-----------|------|-------|-----|-----------|--|--------|-----|------------|-----|--|--|-------|------|-------|-----|--|--|--------|----|-------|-----|--|--|--------|-----|-------|-----|--|--|-------|------|-------|-----|--|--|--------|-----|-------|-----|--|--|--------|-----|-------|-----|--|--|--------|-----|-------|------|--|--|-------|------|---------|--------|--|--|--------|-----|-------|-----|--|--|-------|------|---------|--------|--|--|--------|----|-------|---------|--|--|---------|----|-------|----------|--|--|--------|-----|-------|--------|--|--|--------|-----|-------|---------|--|--|------------------------------------------------------------------------------------------------------------------------------------------------------------------------------------------------------------------------------------------------------------------------------------------------------------------------------------------------------------------------------------------------------------------------------------------------------------------------------------------------------------------------------------|-----------|-----------|--------|-----------|------------|------------|-----------|--------------|-------------|------------|--------------------------------------------------|---|-----------------|-----------------------------------------------|---------------------------|
| <table><tr><td colspan="3">Conc.</td><td>%SD</td><td>/GPC+PC</td><td>Metabolite</td></tr><tr><td>97.510</td><td>15%</td><td>2.098</td><td>Ala</td><td></td><td></td></tr><tr><td>43.827</td><td>108%</td><td>0.943</td><td>Cr</td><td></td><td></td></tr><tr><td>10.286</td><td>462%</td><td>0.221</td><td>PCr</td><td></td><td></td></tr><tr><td>16.852</td><td>280%</td><td>0.363</td><td>Gln</td><td></td><td></td></tr><tr><td>52.430</td><td>76%</td><td>1.128</td><td>Glu</td><td></td><td></td></tr><tr><td>0.000</td><td>999%</td><td>0.000</td><td>GPC</td><td></td><td></td></tr><tr><td>46.481</td><td>8%</td><td>1.000</td><td>PCh</td><td></td><td></td></tr><tr><td>15.546</td><td>89%</td><td>0.334</td><td>GSH</td><td></td><td></td></tr><tr><td>0.000</td><td>999%</td><td>0.000</td><td>Ins</td><td></td><td></td></tr><tr><td>88.174</td><td>23%</td><td>1.897</td><td>Lac</td><td></td><td></td></tr><tr><td>96.973</td><td>13%</td><td>2.086</td><td>NAA</td><td></td><td></td></tr><tr><td>31.006</td><td>32%</td><td>0.667</td><td>NAAG</td><td></td><td></td></tr><tr><td>0.657</td><td>448%</td><td>1.4E-02</td><td>Scyllo</td><td></td><td></td></tr><tr><td>25.707</td><td>58%</td><td>0.553</td><td>Tau</td><td></td><td></td></tr><tr><td>2.439</td><td>462%</td><td>5.2E-02</td><td>-CrCH2</td><td></td><td></td></tr><tr><td>46.481</td><td>8%</td><td>1.000</td><td>GPC+PCh</td><td></td><td></td></tr><tr><td>127.979</td><td>8%</td><td>2.753</td><td>NAA+NAAG</td><td></td><td></td></tr><tr><td>54.113</td><td>18%</td><td>1.164</td><td>Cr+PCr</td><td></td><td></td></tr><tr><td>69.282</td><td>51%</td><td>1.491</td><td>Glu+Gln</td><td></td><td></td></tr></table> | Conc.                |         |               | %SD     | /GPC+PC                  | Metabolite | 97.510 | 15%    | 2.098                  | Ala    |         |       | 43.827                                            | 108%   | 0.943  | Cr            |                                   |  | 10.286 | 462% | 0.221              | PCr |  |  | 16.852    | 280% | 0.363 | Gln |           |  | 52.430 | 76% | 1.128      | Glu |  |  | 0.000 | 999% | 0.000 | GPC |  |  | 46.481 | 8% | 1.000 | PCh |  |  | 15.546 | 89% | 0.334 | GSH |  |  | 0.000 | 999% | 0.000 | Ins |  |  | 88.174 | 23% | 1.897 | Lac |  |  | 96.973 | 13% | 2.086 | NAA |  |  | 31.006 | 32% | 0.667 | NAAG |  |  | 0.657 | 448% | 1.4E-02 | Scyllo |  |  | 25.707 | 58% | 0.553 | Tau |  |  | 2.439 | 462% | 5.2E-02 | -CrCH2 |  |  | 46.481 | 8% | 1.000 | GPC+PCh |  |  | 127.979 | 8% | 2.753 | NAA+NAAG |  |  | 54.113 | 18% | 1.164 | Cr+PCr |  |  | 69.282 | 51% | 1.491 | Glu+Gln |  |  | <table><tr><td>irowst= 7</td></tr><tr><td>islice= 1</td></tr><tr><td>lps= 8</td></tr><tr><td>ltable= 7</td></tr><tr><td>ndcols= 12</td></tr><tr><td>ndrows= 14</td></tr><tr><td>ndslic= 1</td></tr><tr><td>nunfil= 1024</td></tr><tr><td>ppmend= 1.0</td></tr><tr><td>ppmst= 4.0</td></tr><tr><td>savdir= '/home/data/Studies/GBM_Spektro/results/</td></tr><tr><td>,</td></tr><tr><td>sptype= 'tumor'</td></tr><tr><td>srcraw= '/home/data/Studies/GBM_Spektro/data/</td></tr><tr><td>\$DBIEX_7_1_raw_act.SDAT'</td></tr></table> | irowst= 7 | islice= 1 | lps= 8 | ltable= 7 | ndcols= 12 | ndrows= 14 | ndslic= 1 | nunfil= 1024 | ppmend= 1.0 | ppmst= 4.0 | savdir= '/home/data/Studies/GBM_Spektro/results/ | , | sptype= 'tumor' | srcraw= '/home/data/Studies/GBM_Spektro/data/ | \$DBIEX_7_1_raw_act.SDAT' |
| Conc.                                                                                                                                                                                                                                                                                                                                                                                                                                                                                                                                                                                                                                                                                                                                                                                                                                                                                                                                                                                                                                                                                                                                                                                                                                                                                                                                                                                                                                                                                                                                                                                                                                                                                                        |                      |         | %SD           | /GPC+PC | Metabolite               |            |        |        |                        |        |         |       |                                                   |        |        |               |                                   |  |        |      |                    |     |  |  |           |      |       |     |           |  |        |     |            |     |  |  |       |      |       |     |  |  |        |    |       |     |  |  |        |     |       |     |  |  |       |      |       |     |  |  |        |     |       |     |  |  |        |     |       |     |  |  |        |     |       |      |  |  |       |      |         |        |  |  |        |     |       |     |  |  |       |      |         |        |  |  |        |    |       |         |  |  |         |    |       |          |  |  |        |     |       |        |  |  |        |     |       |         |  |  |                                                                                                                                                                                                                                                                                                                                                                                                                                                                                                                                    |           |           |        |           |            |            |           |              |             |            |                                                  |   |                 |                                               |                           |
| 97.510                                                                                                                                                                                                                                                                                                                                                                                                                                                                                                                                                                                                                                                                                                                                                                                                                                                                                                                                                                                                                                                                                                                                                                                                                                                                                                                                                                                                                                                                                                                                                                                                                                                                                                       | 15%                  | 2.098   | Ala           |         |                          |            |        |        |                        |        |         |       |                                                   |        |        |               |                                   |  |        |      |                    |     |  |  |           |      |       |     |           |  |        |     |            |     |  |  |       |      |       |     |  |  |        |    |       |     |  |  |        |     |       |     |  |  |       |      |       |     |  |  |        |     |       |     |  |  |        |     |       |     |  |  |        |     |       |      |  |  |       |      |         |        |  |  |        |     |       |     |  |  |       |      |         |        |  |  |        |    |       |         |  |  |         |    |       |          |  |  |        |     |       |        |  |  |        |     |       |         |  |  |                                                                                                                                                                                                                                                                                                                                                                                                                                                                                                                                    |           |           |        |           |            |            |           |              |             |            |                                                  |   |                 |                                               |                           |
| 43.827                                                                                                                                                                                                                                                                                                                                                                                                                                                                                                                                                                                                                                                                                                                                                                                                                                                                                                                                                                                                                                                                                                                                                                                                                                                                                                                                                                                                                                                                                                                                                                                                                                                                                                       | 108%                 | 0.943   | Cr            |         |                          |            |        |        |                        |        |         |       |                                                   |        |        |               |                                   |  |        |      |                    |     |  |  |           |      |       |     |           |  |        |     |            |     |  |  |       |      |       |     |  |  |        |    |       |     |  |  |        |     |       |     |  |  |       |      |       |     |  |  |        |     |       |     |  |  |        |     |       |     |  |  |        |     |       |      |  |  |       |      |         |        |  |  |        |     |       |     |  |  |       |      |         |        |  |  |        |    |       |         |  |  |         |    |       |          |  |  |        |     |       |        |  |  |        |     |       |         |  |  |                                                                                                                                                                                                                                                                                                                                                                                                                                                                                                                                    |           |           |        |           |            |            |           |              |             |            |                                                  |   |                 |                                               |                           |
| 10.286                                                                                                                                                                                                                                                                                                                                                                                                                                                                                                                                                                                                                                                                                                                                                                                                                                                                                                                                                                                                                                                                                                                                                                                                                                                                                                                                                                                                                                                                                                                                                                                                                                                                                                       | 462%                 | 0.221   | PCr           |         |                          |            |        |        |                        |        |         |       |                                                   |        |        |               |                                   |  |        |      |                    |     |  |  |           |      |       |     |           |  |        |     |            |     |  |  |       |      |       |     |  |  |        |    |       |     |  |  |        |     |       |     |  |  |       |      |       |     |  |  |        |     |       |     |  |  |        |     |       |     |  |  |        |     |       |      |  |  |       |      |         |        |  |  |        |     |       |     |  |  |       |      |         |        |  |  |        |    |       |         |  |  |         |    |       |          |  |  |        |     |       |        |  |  |        |     |       |         |  |  |                                                                                                                                                                                                                                                                                                                                                                                                                                                                                                                                    |           |           |        |           |            |            |           |              |             |            |                                                  |   |                 |                                               |                           |
| 16.852                                                                                                                                                                                                                                                                                                                                                                                                                                                                                                                                                                                                                                                                                                                                                                                                                                                                                                                                                                                                                                                                                                                                                                                                                                                                                                                                                                                                                                                                                                                                                                                                                                                                                                       | 280%                 | 0.363   | Gln           |         |                          |            |        |        |                        |        |         |       |                                                   |        |        |               |                                   |  |        |      |                    |     |  |  |           |      |       |     |           |  |        |     |            |     |  |  |       |      |       |     |  |  |        |    |       |     |  |  |        |     |       |     |  |  |       |      |       |     |  |  |        |     |       |     |  |  |        |     |       |     |  |  |        |     |       |      |  |  |       |      |         |        |  |  |        |     |       |     |  |  |       |      |         |        |  |  |        |    |       |         |  |  |         |    |       |          |  |  |        |     |       |        |  |  |        |     |       |         |  |  |                                                                                                                                                                                                                                                                                                                                                                                                                                                                                                                                    |           |           |        |           |            |            |           |              |             |            |                                                  |   |                 |                                               |                           |
| 52.430                                                                                                                                                                                                                                                                                                                                                                                                                                                                                                                                                                                                                                                                                                                                                                                                                                                                                                                                                                                                                                                                                                                                                                                                                                                                                                                                                                                                                                                                                                                                                                                                                                                                                                       | 76%                  | 1.128   | Glu           |         |                          |            |        |        |                        |        |         |       |                                                   |        |        |               |                                   |  |        |      |                    |     |  |  |           |      |       |     |           |  |        |     |            |     |  |  |       |      |       |     |  |  |        |    |       |     |  |  |        |     |       |     |  |  |       |      |       |     |  |  |        |     |       |     |  |  |        |     |       |     |  |  |        |     |       |      |  |  |       |      |         |        |  |  |        |     |       |     |  |  |       |      |         |        |  |  |        |    |       |         |  |  |         |    |       |          |  |  |        |     |       |        |  |  |        |     |       |         |  |  |                                                                                                                                                                                                                                                                                                                                                                                                                                                                                                                                    |           |           |        |           |            |            |           |              |             |            |                                                  |   |                 |                                               |                           |
| 0.000                                                                                                                                                                                                                                                                                                                                                                                                                                                                                                                                                                                                                                                                                                                                                                                                                                                                                                                                                                                                                                                                                                                                                                                                                                                                                                                                                                                                                                                                                                                                                                                                                                                                                                        | 999%                 | 0.000   | GPC           |         |                          |            |        |        |                        |        |         |       |                                                   |        |        |               |                                   |  |        |      |                    |     |  |  |           |      |       |     |           |  |        |     |            |     |  |  |       |      |       |     |  |  |        |    |       |     |  |  |        |     |       |     |  |  |       |      |       |     |  |  |        |     |       |     |  |  |        |     |       |     |  |  |        |     |       |      |  |  |       |      |         |        |  |  |        |     |       |     |  |  |       |      |         |        |  |  |        |    |       |         |  |  |         |    |       |          |  |  |        |     |       |        |  |  |        |     |       |         |  |  |                                                                                                                                                                                                                                                                                                                                                                                                                                                                                                                                    |           |           |        |           |            |            |           |              |             |            |                                                  |   |                 |                                               |                           |
| 46.481                                                                                                                                                                                                                                                                                                                                                                                                                                                                                                                                                                                                                                                                                                                                                                                                                                                                                                                                                                                                                                                                                                                                                                                                                                                                                                                                                                                                                                                                                                                                                                                                                                                                                                       | 8%                   | 1.000   | PCh           |         |                          |            |        |        |                        |        |         |       |                                                   |        |        |               |                                   |  |        |      |                    |     |  |  |           |      |       |     |           |  |        |     |            |     |  |  |       |      |       |     |  |  |        |    |       |     |  |  |        |     |       |     |  |  |       |      |       |     |  |  |        |     |       |     |  |  |        |     |       |     |  |  |        |     |       |      |  |  |       |      |         |        |  |  |        |     |       |     |  |  |       |      |         |        |  |  |        |    |       |         |  |  |         |    |       |          |  |  |        |     |       |        |  |  |        |     |       |         |  |  |                                                                                                                                                                                                                                                                                                                                                                                                                                                                                                                                    |           |           |        |           |            |            |           |              |             |            |                                                  |   |                 |                                               |                           |
| 15.546                                                                                                                                                                                                                                                                                                                                                                                                                                                                                                                                                                                                                                                                                                                                                                                                                                                                                                                                                                                                                                                                                                                                                                                                                                                                                                                                                                                                                                                                                                                                                                                                                                                                                                       | 89%                  | 0.334   | GSH           |         |                          |            |        |        |                        |        |         |       |                                                   |        |        |               |                                   |  |        |      |                    |     |  |  |           |      |       |     |           |  |        |     |            |     |  |  |       |      |       |     |  |  |        |    |       |     |  |  |        |     |       |     |  |  |       |      |       |     |  |  |        |     |       |     |  |  |        |     |       |     |  |  |        |     |       |      |  |  |       |      |         |        |  |  |        |     |       |     |  |  |       |      |         |        |  |  |        |    |       |         |  |  |         |    |       |          |  |  |        |     |       |        |  |  |        |     |       |         |  |  |                                                                                                                                                                                                                                                                                                                                                                                                                                                                                                                                    |           |           |        |           |            |            |           |              |             |            |                                                  |   |                 |                                               |                           |
| 0.000                                                                                                                                                                                                                                                                                                                                                                                                                                                                                                                                                                                                                                                                                                                                                                                                                                                                                                                                                                                                                                                                                                                                                                                                                                                                                                                                                                                                                                                                                                                                                                                                                                                                                                        | 999%                 | 0.000   | Ins           |         |                          |            |        |        |                        |        |         |       |                                                   |        |        |               |                                   |  |        |      |                    |     |  |  |           |      |       |     |           |  |        |     |            |     |  |  |       |      |       |     |  |  |        |    |       |     |  |  |        |     |       |     |  |  |       |      |       |     |  |  |        |     |       |     |  |  |        |     |       |     |  |  |        |     |       |      |  |  |       |      |         |        |  |  |        |     |       |     |  |  |       |      |         |        |  |  |        |    |       |         |  |  |         |    |       |          |  |  |        |     |       |        |  |  |        |     |       |         |  |  |                                                                                                                                                                                                                                                                                                                                                                                                                                                                                                                                    |           |           |        |           |            |            |           |              |             |            |                                                  |   |                 |                                               |                           |
| 88.174                                                                                                                                                                                                                                                                                                                                                                                                                                                                                                                                                                                                                                                                                                                                                                                                                                                                                                                                                                                                                                                                                                                                                                                                                                                                                                                                                                                                                                                                                                                                                                                                                                                                                                       | 23%                  | 1.897   | Lac           |         |                          |            |        |        |                        |        |         |       |                                                   |        |        |               |                                   |  |        |      |                    |     |  |  |           |      |       |     |           |  |        |     |            |     |  |  |       |      |       |     |  |  |        |    |       |     |  |  |        |     |       |     |  |  |       |      |       |     |  |  |        |     |       |     |  |  |        |     |       |     |  |  |        |     |       |      |  |  |       |      |         |        |  |  |        |     |       |     |  |  |       |      |         |        |  |  |        |    |       |         |  |  |         |    |       |          |  |  |        |     |       |        |  |  |        |     |       |         |  |  |                                                                                                                                                                                                                                                                                                                                                                                                                                                                                                                                    |           |           |        |           |            |            |           |              |             |            |                                                  |   |                 |                                               |                           |
| 96.973                                                                                                                                                                                                                                                                                                                                                                                                                                                                                                                                                                                                                                                                                                                                                                                                                                                                                                                                                                                                                                                                                                                                                                                                                                                                                                                                                                                                                                                                                                                                                                                                                                                                                                       | 13%                  | 2.086   | NAA           |         |                          |            |        |        |                        |        |         |       |                                                   |        |        |               |                                   |  |        |      |                    |     |  |  |           |      |       |     |           |  |        |     |            |     |  |  |       |      |       |     |  |  |        |    |       |     |  |  |        |     |       |     |  |  |       |      |       |     |  |  |        |     |       |     |  |  |        |     |       |     |  |  |        |     |       |      |  |  |       |      |         |        |  |  |        |     |       |     |  |  |       |      |         |        |  |  |        |    |       |         |  |  |         |    |       |          |  |  |        |     |       |        |  |  |        |     |       |         |  |  |                                                                                                                                                                                                                                                                                                                                                                                                                                                                                                                                    |           |           |        |           |            |            |           |              |             |            |                                                  |   |                 |                                               |                           |
| 31.006                                                                                                                                                                                                                                                                                                                                                                                                                                                                                                                                                                                                                                                                                                                                                                                                                                                                                                                                                                                                                                                                                                                                                                                                                                                                                                                                                                                                                                                                                                                                                                                                                                                                                                       | 32%                  | 0.667   | NAAG          |         |                          |            |        |        |                        |        |         |       |                                                   |        |        |               |                                   |  |        |      |                    |     |  |  |           |      |       |     |           |  |        |     |            |     |  |  |       |      |       |     |  |  |        |    |       |     |  |  |        |     |       |     |  |  |       |      |       |     |  |  |        |     |       |     |  |  |        |     |       |     |  |  |        |     |       |      |  |  |       |      |         |        |  |  |        |     |       |     |  |  |       |      |         |        |  |  |        |    |       |         |  |  |         |    |       |          |  |  |        |     |       |        |  |  |        |     |       |         |  |  |                                                                                                                                                                                                                                                                                                                                                                                                                                                                                                                                    |           |           |        |           |            |            |           |              |             |            |                                                  |   |                 |                                               |                           |
| 0.657                                                                                                                                                                                                                                                                                                                                                                                                                                                                                                                                                                                                                                                                                                                                                                                                                                                                                                                                                                                                                                                                                                                                                                                                                                                                                                                                                                                                                                                                                                                                                                                                                                                                                                        | 448%                 | 1.4E-02 | Scyllo        |         |                          |            |        |        |                        |        |         |       |                                                   |        |        |               |                                   |  |        |      |                    |     |  |  |           |      |       |     |           |  |        |     |            |     |  |  |       |      |       |     |  |  |        |    |       |     |  |  |        |     |       |     |  |  |       |      |       |     |  |  |        |     |       |     |  |  |        |     |       |     |  |  |        |     |       |      |  |  |       |      |         |        |  |  |        |     |       |     |  |  |       |      |         |        |  |  |        |    |       |         |  |  |         |    |       |          |  |  |        |     |       |        |  |  |        |     |       |         |  |  |                                                                                                                                                                                                                                                                                                                                                                                                                                                                                                                                    |           |           |        |           |            |            |           |              |             |            |                                                  |   |                 |                                               |                           |
| 25.707                                                                                                                                                                                                                                                                                                                                                                                                                                                                                                                                                                                                                                                                                                                                                                                                                                                                                                                                                                                                                                                                                                                                                                                                                                                                                                                                                                                                                                                                                                                                                                                                                                                                                                       | 58%                  | 0.553   | Tau           |         |                          |            |        |        |                        |        |         |       |                                                   |        |        |               |                                   |  |        |      |                    |     |  |  |           |      |       |     |           |  |        |     |            |     |  |  |       |      |       |     |  |  |        |    |       |     |  |  |        |     |       |     |  |  |       |      |       |     |  |  |        |     |       |     |  |  |        |     |       |     |  |  |        |     |       |      |  |  |       |      |         |        |  |  |        |     |       |     |  |  |       |      |         |        |  |  |        |    |       |         |  |  |         |    |       |          |  |  |        |     |       |        |  |  |        |     |       |         |  |  |                                                                                                                                                                                                                                                                                                                                                                                                                                                                                                                                    |           |           |        |           |            |            |           |              |             |            |                                                  |   |                 |                                               |                           |
| 2.439                                                                                                                                                                                                                                                                                                                                                                                                                                                                                                                                                                                                                                                                                                                                                                                                                                                                                                                                                                                                                                                                                                                                                                                                                                                                                                                                                                                                                                                                                                                                                                                                                                                                                                        | 462%                 | 5.2E-02 | -CrCH2        |         |                          |            |        |        |                        |        |         |       |                                                   |        |        |               |                                   |  |        |      |                    |     |  |  |           |      |       |     |           |  |        |     |            |     |  |  |       |      |       |     |  |  |        |    |       |     |  |  |        |     |       |     |  |  |       |      |       |     |  |  |        |     |       |     |  |  |        |     |       |     |  |  |        |     |       |      |  |  |       |      |         |        |  |  |        |     |       |     |  |  |       |      |         |        |  |  |        |    |       |         |  |  |         |    |       |          |  |  |        |     |       |        |  |  |        |     |       |         |  |  |                                                                                                                                                                                                                                                                                                                                                                                                                                                                                                                                    |           |           |        |           |            |            |           |              |             |            |                                                  |   |                 |                                               |                           |
| 46.481                                                                                                                                                                                                                                                                                                                                                                                                                                                                                                                                                                                                                                                                                                                                                                                                                                                                                                                                                                                                                                                                                                                                                                                                                                                                                                                                                                                                                                                                                                                                                                                                                                                                                                       | 8%                   | 1.000   | GPC+PCh       |         |                          |            |        |        |                        |        |         |       |                                                   |        |        |               |                                   |  |        |      |                    |     |  |  |           |      |       |     |           |  |        |     |            |     |  |  |       |      |       |     |  |  |        |    |       |     |  |  |        |     |       |     |  |  |       |      |       |     |  |  |        |     |       |     |  |  |        |     |       |     |  |  |        |     |       |      |  |  |       |      |         |        |  |  |        |     |       |     |  |  |       |      |         |        |  |  |        |    |       |         |  |  |         |    |       |          |  |  |        |     |       |        |  |  |        |     |       |         |  |  |                                                                                                                                                                                                                                                                                                                                                                                                                                                                                                                                    |           |           |        |           |            |            |           |              |             |            |                                                  |   |                 |                                               |                           |
| 127.979                                                                                                                                                                                                                                                                                                                                                                                                                                                                                                                                                                                                                                                                                                                                                                                                                                                                                                                                                                                                                                                                                                                                                                                                                                                                                                                                                                                                                                                                                                                                                                                                                                                                                                      | 8%                   | 2.753   | NAA+NAAG      |         |                          |            |        |        |                        |        |         |       |                                                   |        |        |               |                                   |  |        |      |                    |     |  |  |           |      |       |     |           |  |        |     |            |     |  |  |       |      |       |     |  |  |        |    |       |     |  |  |        |     |       |     |  |  |       |      |       |     |  |  |        |     |       |     |  |  |        |     |       |     |  |  |        |     |       |      |  |  |       |      |         |        |  |  |        |     |       |     |  |  |       |      |         |        |  |  |        |    |       |         |  |  |         |    |       |          |  |  |        |     |       |        |  |  |        |     |       |         |  |  |                                                                                                                                                                                                                                                                                                                                                                                                                                                                                                                                    |           |           |        |           |            |            |           |              |             |            |                                                  |   |                 |                                               |                           |
| 54.113                                                                                                                                                                                                                                                                                                                                                                                                                                                                                                                                                                                                                                                                                                                                                                                                                                                                                                                                                                                                                                                                                                                                                                                                                                                                                                                                                                                                                                                                                                                                                                                                                                                                                                       | 18%                  | 1.164   | Cr+PCr        |         |                          |            |        |        |                        |        |         |       |                                                   |        |        |               |                                   |  |        |      |                    |     |  |  |           |      |       |     |           |  |        |     |            |     |  |  |       |      |       |     |  |  |        |    |       |     |  |  |        |     |       |     |  |  |       |      |       |     |  |  |        |     |       |     |  |  |        |     |       |     |  |  |        |     |       |      |  |  |       |      |         |        |  |  |        |     |       |     |  |  |       |      |         |        |  |  |        |    |       |         |  |  |         |    |       |          |  |  |        |     |       |        |  |  |        |     |       |         |  |  |                                                                                                                                                                                                                                                                                                                                                                                                                                                                                                                                    |           |           |        |           |            |            |           |              |             |            |                                                  |   |                 |                                               |                           |
| 69.282                                                                                                                                                                                                                                                                                                                                                                                                                                                                                                                                                                                                                                                                                                                                                                                                                                                                                                                                                                                                                                                                                                                                                                                                                                                                                                                                                                                                                                                                                                                                                                                                                                                                                                       | 51%                  | 1.491   | Glu+Gln       |         |                          |            |        |        |                        |        |         |       |                                                   |        |        |               |                                   |  |        |      |                    |     |  |  |           |      |       |     |           |  |        |     |            |     |  |  |       |      |       |     |  |  |        |    |       |     |  |  |        |     |       |     |  |  |       |      |       |     |  |  |        |     |       |     |  |  |        |     |       |     |  |  |        |     |       |      |  |  |       |      |         |        |  |  |        |     |       |     |  |  |       |      |         |        |  |  |        |    |       |         |  |  |         |    |       |          |  |  |        |     |       |        |  |  |        |     |       |         |  |  |                                                                                                                                                                                                                                                                                                                                                                                                                                                                                                                                    |           |           |        |           |            |            |           |              |             |            |                                                  |   |                 |                                               |                           |
| irowst= 7                                                                                                                                                                                                                                                                                                                                                                                                                                                                                                                                                                                                                                                                                                                                                                                                                                                                                                                                                                                                                                                                                                                                                                                                                                                                                                                                                                                                                                                                                                                                                                                                                                                                                                    |                      |         |               |         |                          |            |        |        |                        |        |         |       |                                                   |        |        |               |                                   |  |        |      |                    |     |  |  |           |      |       |     |           |  |        |     |            |     |  |  |       |      |       |     |  |  |        |    |       |     |  |  |        |     |       |     |  |  |       |      |       |     |  |  |        |     |       |     |  |  |        |     |       |     |  |  |        |     |       |      |  |  |       |      |         |        |  |  |        |     |       |     |  |  |       |      |         |        |  |  |        |    |       |         |  |  |         |    |       |          |  |  |        |     |       |        |  |  |        |     |       |         |  |  |                                                                                                                                                                                                                                                                                                                                                                                                                                                                                                                                    |           |           |        |           |            |            |           |              |             |            |                                                  |   |                 |                                               |                           |
| islice= 1                                                                                                                                                                                                                                                                                                                                                                                                                                                                                                                                                                                                                                                                                                                                                                                                                                                                                                                                                                                                                                                                                                                                                                                                                                                                                                                                                                                                                                                                                                                                                                                                                                                                                                    |                      |         |               |         |                          |            |        |        |                        |        |         |       |                                                   |        |        |               |                                   |  |        |      |                    |     |  |  |           |      |       |     |           |  |        |     |            |     |  |  |       |      |       |     |  |  |        |    |       |     |  |  |        |     |       |     |  |  |       |      |       |     |  |  |        |     |       |     |  |  |        |     |       |     |  |  |        |     |       |      |  |  |       |      |         |        |  |  |        |     |       |     |  |  |       |      |         |        |  |  |        |    |       |         |  |  |         |    |       |          |  |  |        |     |       |        |  |  |        |     |       |         |  |  |                                                                                                                                                                                                                                                                                                                                                                                                                                                                                                                                    |           |           |        |           |            |            |           |              |             |            |                                                  |   |                 |                                               |                           |
| lps= 8                                                                                                                                                                                                                                                                                                                                                                                                                                                                                                                                                                                                                                                                                                                                                                                                                                                                                                                                                                                                                                                                                                                                                                                                                                                                                                                                                                                                                                                                                                                                                                                                                                                                                                       |                      |         |               |         |                          |            |        |        |                        |        |         |       |                                                   |        |        |               |                                   |  |        |      |                    |     |  |  |           |      |       |     |           |  |        |     |            |     |  |  |       |      |       |     |  |  |        |    |       |     |  |  |        |     |       |     |  |  |       |      |       |     |  |  |        |     |       |     |  |  |        |     |       |     |  |  |        |     |       |      |  |  |       |      |         |        |  |  |        |     |       |     |  |  |       |      |         |        |  |  |        |    |       |         |  |  |         |    |       |          |  |  |        |     |       |        |  |  |        |     |       |         |  |  |                                                                                                                                                                                                                                                                                                                                                                                                                                                                                                                                    |           |           |        |           |            |            |           |              |             |            |                                                  |   |                 |                                               |                           |
| ltable= 7                                                                                                                                                                                                                                                                                                                                                                                                                                                                                                                                                                                                                                                                                                                                                                                                                                                                                                                                                                                                                                                                                                                                                                                                                                                                                                                                                                                                                                                                                                                                                                                                                                                                                                    |                      |         |               |         |                          |            |        |        |                        |        |         |       |                                                   |        |        |               |                                   |  |        |      |                    |     |  |  |           |      |       |     |           |  |        |     |            |     |  |  |       |      |       |     |  |  |        |    |       |     |  |  |        |     |       |     |  |  |       |      |       |     |  |  |        |     |       |     |  |  |        |     |       |     |  |  |        |     |       |      |  |  |       |      |         |        |  |  |        |     |       |     |  |  |       |      |         |        |  |  |        |    |       |         |  |  |         |    |       |          |  |  |        |     |       |        |  |  |        |     |       |         |  |  |                                                                                                                                                                                                                                                                                                                                                                                                                                                                                                                                    |           |           |        |           |            |            |           |              |             |            |                                                  |   |                 |                                               |                           |
| ndcols= 12                                                                                                                                                                                                                                                                                                                                                                                                                                                                                                                                                                                                                                                                                                                                                                                                                                                                                                                                                                                                                                                                                                                                                                                                                                                                                                                                                                                                                                                                                                                                                                                                                                                                                                   |                      |         |               |         |                          |            |        |        |                        |        |         |       |                                                   |        |        |               |                                   |  |        |      |                    |     |  |  |           |      |       |     |           |  |        |     |            |     |  |  |       |      |       |     |  |  |        |    |       |     |  |  |        |     |       |     |  |  |       |      |       |     |  |  |        |     |       |     |  |  |        |     |       |     |  |  |        |     |       |      |  |  |       |      |         |        |  |  |        |     |       |     |  |  |       |      |         |        |  |  |        |    |       |         |  |  |         |    |       |          |  |  |        |     |       |        |  |  |        |     |       |         |  |  |                                                                                                                                                                                                                                                                                                                                                                                                                                                                                                                                    |           |           |        |           |            |            |           |              |             |            |                                                  |   |                 |                                               |                           |
| ndrows= 14                                                                                                                                                                                                                                                                                                                                                                                                                                                                                                                                                                                                                                                                                                                                                                                                                                                                                                                                                                                                                                                                                                                                                                                                                                                                                                                                                                                                                                                                                                                                                                                                                                                                                                   |                      |         |               |         |                          |            |        |        |                        |        |         |       |                                                   |        |        |               |                                   |  |        |      |                    |     |  |  |           |      |       |     |           |  |        |     |            |     |  |  |       |      |       |     |  |  |        |    |       |     |  |  |        |     |       |     |  |  |       |      |       |     |  |  |        |     |       |     |  |  |        |     |       |     |  |  |        |     |       |      |  |  |       |      |         |        |  |  |        |     |       |     |  |  |       |      |         |        |  |  |        |    |       |         |  |  |         |    |       |          |  |  |        |     |       |        |  |  |        |     |       |         |  |  |                                                                                                                                                                                                                                                                                                                                                                                                                                                                                                                                    |           |           |        |           |            |            |           |              |             |            |                                                  |   |                 |                                               |                           |
| ndslic= 1                                                                                                                                                                                                                                                                                                                                                                                                                                                                                                                                                                                                                                                                                                                                                                                                                                                                                                                                                                                                                                                                                                                                                                                                                                                                                                                                                                                                                                                                                                                                                                                                                                                                                                    |                      |         |               |         |                          |            |        |        |                        |        |         |       |                                                   |        |        |               |                                   |  |        |      |                    |     |  |  |           |      |       |     |           |  |        |     |            |     |  |  |       |      |       |     |  |  |        |    |       |     |  |  |        |     |       |     |  |  |       |      |       |     |  |  |        |     |       |     |  |  |        |     |       |     |  |  |        |     |       |      |  |  |       |      |         |        |  |  |        |     |       |     |  |  |       |      |         |        |  |  |        |    |       |         |  |  |         |    |       |          |  |  |        |     |       |        |  |  |        |     |       |         |  |  |                                                                                                                                                                                                                                                                                                                                                                                                                                                                                                                                    |           |           |        |           |            |            |           |              |             |            |                                                  |   |                 |                                               |                           |
| nunfil= 1024                                                                                                                                                                                                                                                                                                                                                                                                                                                                                                                                                                                                                                                                                                                                                                                                                                                                                                                                                                                                                                                                                                                                                                                                                                                                                                                                                                                                                                                                                                                                                                                                                                                                                                 |                      |         |               |         |                          |            |        |        |                        |        |         |       |                                                   |        |        |               |                                   |  |        |      |                    |     |  |  |           |      |       |     |           |  |        |     |            |     |  |  |       |      |       |     |  |  |        |    |       |     |  |  |        |     |       |     |  |  |       |      |       |     |  |  |        |     |       |     |  |  |        |     |       |     |  |  |        |     |       |      |  |  |       |      |         |        |  |  |        |     |       |     |  |  |       |      |         |        |  |  |        |    |       |         |  |  |         |    |       |          |  |  |        |     |       |        |  |  |        |     |       |         |  |  |                                                                                                                                                                                                                                                                                                                                                                                                                                                                                                                                    |           |           |        |           |            |            |           |              |             |            |                                                  |   |                 |                                               |                           |
| ppmend= 1.0                                                                                                                                                                                                                                                                                                                                                                                                                                                                                                                                                                                                                                                                                                                                                                                                                                                                                                                                                                                                                                                                                                                                                                                                                                                                                                                                                                                                                                                                                                                                                                                                                                                                                                  |                      |         |               |         |                          |            |        |        |                        |        |         |       |                                                   |        |        |               |                                   |  |        |      |                    |     |  |  |           |      |       |     |           |  |        |     |            |     |  |  |       |      |       |     |  |  |        |    |       |     |  |  |        |     |       |     |  |  |       |      |       |     |  |  |        |     |       |     |  |  |        |     |       |     |  |  |        |     |       |      |  |  |       |      |         |        |  |  |        |     |       |     |  |  |       |      |         |        |  |  |        |    |       |         |  |  |         |    |       |          |  |  |        |     |       |        |  |  |        |     |       |         |  |  |                                                                                                                                                                                                                                                                                                                                                                                                                                                                                                                                    |           |           |        |           |            |            |           |              |             |            |                                                  |   |                 |                                               |                           |
| ppmst= 4.0                                                                                                                                                                                                                                                                                                                                                                                                                                                                                                                                                                                                                                                                                                                                                                                                                                                                                                                                                                                                                                                                                                                                                                                                                                                                                                                                                                                                                                                                                                                                                                                                                                                                                                   |                      |         |               |         |                          |            |        |        |                        |        |         |       |                                                   |        |        |               |                                   |  |        |      |                    |     |  |  |           |      |       |     |           |  |        |     |            |     |  |  |       |      |       |     |  |  |        |    |       |     |  |  |        |     |       |     |  |  |       |      |       |     |  |  |        |     |       |     |  |  |        |     |       |     |  |  |        |     |       |      |  |  |       |      |         |        |  |  |        |     |       |     |  |  |       |      |         |        |  |  |        |    |       |         |  |  |         |    |       |          |  |  |        |     |       |        |  |  |        |     |       |         |  |  |                                                                                                                                                                                                                                                                                                                                                                                                                                                                                                                                    |           |           |        |           |            |            |           |              |             |            |                                                  |   |                 |                                               |                           |
| savdir= '/home/data/Studies/GBM_Spektro/results/                                                                                                                                                                                                                                                                                                                                                                                                                                                                                                                                                                                                                                                                                                                                                                                                                                                                                                                                                                                                                                                                                                                                                                                                                                                                                                                                                                                                                                                                                                                                                                                                                                                             |                      |         |               |         |                          |            |        |        |                        |        |         |       |                                                   |        |        |               |                                   |  |        |      |                    |     |  |  |           |      |       |     |           |  |        |     |            |     |  |  |       |      |       |     |  |  |        |    |       |     |  |  |        |     |       |     |  |  |       |      |       |     |  |  |        |     |       |     |  |  |        |     |       |     |  |  |        |     |       |      |  |  |       |      |         |        |  |  |        |     |       |     |  |  |       |      |         |        |  |  |        |    |       |         |  |  |         |    |       |          |  |  |        |     |       |        |  |  |        |     |       |         |  |  |                                                                                                                                                                                                                                                                                                                                                                                                                                                                                                                                    |           |           |        |           |            |            |           |              |             |            |                                                  |   |                 |                                               |                           |
| ,                                                                                                                                                                                                                                                                                                                                                                                                                                                                                                                                                                                                                                                                                                                                                                                                                                                                                                                                                                                                                                                                                                                                                                                                                                                                                                                                                                                                                                                                                                                                                                                                                                                                                                            |                      |         |               |         |                          |            |        |        |                        |        |         |       |                                                   |        |        |               |                                   |  |        |      |                    |     |  |  |           |      |       |     |           |  |        |     |            |     |  |  |       |      |       |     |  |  |        |    |       |     |  |  |        |     |       |     |  |  |       |      |       |     |  |  |        |     |       |     |  |  |        |     |       |     |  |  |        |     |       |      |  |  |       |      |         |        |  |  |        |     |       |     |  |  |       |      |         |        |  |  |        |    |       |         |  |  |         |    |       |          |  |  |        |     |       |        |  |  |        |     |       |         |  |  |                                                                                                                                                                                                                                                                                                                                                                                                                                                                                                                                    |           |           |        |           |            |            |           |              |             |            |                                                  |   |                 |                                               |                           |
| sptype= 'tumor'                                                                                                                                                                                                                                                                                                                                                                                                                                                                                                                                                                                                                                                                                                                                                                                                                                                                                                                                                                                                                                                                                                                                                                                                                                                                                                                                                                                                                                                                                                                                                                                                                                                                                              |                      |         |               |         |                          |            |        |        |                        |        |         |       |                                                   |        |        |               |                                   |  |        |      |                    |     |  |  |           |      |       |     |           |  |        |     |            |     |  |  |       |      |       |     |  |  |        |    |       |     |  |  |        |     |       |     |  |  |       |      |       |     |  |  |        |     |       |     |  |  |        |     |       |     |  |  |        |     |       |      |  |  |       |      |         |        |  |  |        |     |       |     |  |  |       |      |         |        |  |  |        |    |       |         |  |  |         |    |       |          |  |  |        |     |       |        |  |  |        |     |       |         |  |  |                                                                                                                                                                                                                                                                                                                                                                                                                                                                                                                                    |           |           |        |           |            |            |           |              |             |            |                                                  |   |                 |                                               |                           |
| srcraw= '/home/data/Studies/GBM_Spektro/data/                                                                                                                                                                                                                                                                                                                                                                                                                                                                                                                                                                                                                                                                                                                                                                                                                                                                                                                                                                                                                                                                                                                                                                                                                                                                                                                                                                                                                                                                                                                                                                                                                                                                |                      |         |               |         |                          |            |        |        |                        |        |         |       |                                                   |        |        |               |                                   |  |        |      |                    |     |  |  |           |      |       |     |           |  |        |     |            |     |  |  |       |      |       |     |  |  |        |    |       |     |  |  |        |     |       |     |  |  |       |      |       |     |  |  |        |     |       |     |  |  |        |     |       |     |  |  |        |     |       |      |  |  |       |      |         |        |  |  |        |     |       |     |  |  |       |      |         |        |  |  |        |    |       |         |  |  |         |    |       |          |  |  |        |     |       |        |  |  |        |     |       |         |  |  |                                                                                                                                                                                                                                                                                                                                                                                                                                                                                                                                    |           |           |        |           |            |            |           |              |             |            |                                                  |   |                 |                                               |                           |
| \$DBIEX_7_1_raw_act.SDAT'                                                                                                                                                                                                                                                                                                                                                                                                                                                                                                                                                                                                                                                                                                                                                                                                                                                                                                                                                                                                                                                                                                                                                                                                                                                                                                                                                                                                                                                                                                                                                                                                                                                                                    |                      |         |               |         |                          |            |        |        |                        |        |         |       |                                                   |        |        |               |                                   |  |        |      |                    |     |  |  |           |      |       |     |           |  |        |     |            |     |  |  |       |      |       |     |  |  |        |    |       |     |  |  |        |     |       |     |  |  |       |      |       |     |  |  |        |     |       |     |  |  |        |     |       |     |  |  |        |     |       |      |  |  |       |      |         |        |  |  |        |     |       |     |  |  |       |      |         |        |  |  |        |    |       |         |  |  |         |    |       |          |  |  |        |     |       |        |  |  |        |     |       |         |  |  |                                                                                                                                                                                                                                                                                                                                                                                                                                                                                                                                    |           |           |        |           |            |            |           |              |             |            |                                                  |   |                 |                                               |                           |
| <table><tr><td>12.125</td><td>712%</td><td>0.261</td><td>Lip13a</td></tr><tr><td>0.000</td><td>999%</td><td>0.000</td><td>Lip13b</td></tr><tr><td>0.246</td><td>999%</td><td>5.3E-03</td><td>Lip20</td></tr><tr><td>12.125</td><td>712%</td><td>0.261</td><td>Lip13a+Lip13b</td></tr></table>                                                                                                                                                                                                                                                                                                                                                                                                                                                                                                                                                                                                                                                                                                                                                                                                                                                                                                                                                                                                                                                                                                                                                                                                                                                                                                                                                                                                                | 12.125               | 712%    | 0.261         | Lip13a  | 0.000                    | 999%       | 0.000  | Lip13b | 0.246                  | 999%   | 5.3E-03 | Lip20 | 12.125                                            | 712%   | 0.261  | Lip13a+Lip13b |                                   |  |        |      |                    |     |  |  |           |      |       |     |           |  |        |     |            |     |  |  |       |      |       |     |  |  |        |    |       |     |  |  |        |     |       |     |  |  |       |      |       |     |  |  |        |     |       |     |  |  |        |     |       |     |  |  |        |     |       |      |  |  |       |      |         |        |  |  |        |     |       |     |  |  |       |      |         |        |  |  |        |    |       |         |  |  |         |    |       |          |  |  |        |     |       |        |  |  |        |     |       |         |  |  |                                                                                                                                                                                                                                                                                                                                                                                                                                                                                                                                    |           |           |        |           |            |            |           |              |             |            |                                                  |   |                 |                                               |                           |
| 12.125                                                                                                                                                                                                                                                                                                                                                                                                                                                                                                                                                                                                                                                                                                                                                                                                                                                                                                                                                                                                                                                                                                                                                                                                                                                                                                                                                                                                                                                                                                                                                                                                                                                                                                       | 712%                 | 0.261   | Lip13a        |         |                          |            |        |        |                        |        |         |       |                                                   |        |        |               |                                   |  |        |      |                    |     |  |  |           |      |       |     |           |  |        |     |            |     |  |  |       |      |       |     |  |  |        |    |       |     |  |  |        |     |       |     |  |  |       |      |       |     |  |  |        |     |       |     |  |  |        |     |       |     |  |  |        |     |       |      |  |  |       |      |         |        |  |  |        |     |       |     |  |  |       |      |         |        |  |  |        |    |       |         |  |  |         |    |       |          |  |  |        |     |       |        |  |  |        |     |       |         |  |  |                                                                                                                                                                                                                                                                                                                                                                                                                                                                                                                                    |           |           |        |           |            |            |           |              |             |            |                                                  |   |                 |                                               |                           |
| 0.000                                                                                                                                                                                                                                                                                                                                                                                                                                                                                                                                                                                                                                                                                                                                                                                                                                                                                                                                                                                                                                                                                                                                                                                                                                                                                                                                                                                                                                                                                                                                                                                                                                                                                                        | 999%                 | 0.000   | Lip13b        |         |                          |            |        |        |                        |        |         |       |                                                   |        |        |               |                                   |  |        |      |                    |     |  |  |           |      |       |     |           |  |        |     |            |     |  |  |       |      |       |     |  |  |        |    |       |     |  |  |        |     |       |     |  |  |       |      |       |     |  |  |        |     |       |     |  |  |        |     |       |     |  |  |        |     |       |      |  |  |       |      |         |        |  |  |        |     |       |     |  |  |       |      |         |        |  |  |        |    |       |         |  |  |         |    |       |          |  |  |        |     |       |        |  |  |        |     |       |         |  |  |                                                                                                                                                                                                                                                                                                                                                                                                                                                                                                                                    |           |           |        |           |            |            |           |              |             |            |                                                  |   |                 |                                               |                           |
| 0.246                                                                                                                                                                                                                                                                                                                                                                                                                                                                                                                                                                                                                                                                                                                                                                                                                                                                                                                                                                                                                                                                                                                                                                                                                                                                                                                                                                                                                                                                                                                                                                                                                                                                                                        | 999%                 | 5.3E-03 | Lip20         |         |                          |            |        |        |                        |        |         |       |                                                   |        |        |               |                                   |  |        |      |                    |     |  |  |           |      |       |     |           |  |        |     |            |     |  |  |       |      |       |     |  |  |        |    |       |     |  |  |        |     |       |     |  |  |       |      |       |     |  |  |        |     |       |     |  |  |        |     |       |     |  |  |        |     |       |      |  |  |       |      |         |        |  |  |        |     |       |     |  |  |       |      |         |        |  |  |        |    |       |         |  |  |         |    |       |          |  |  |        |     |       |        |  |  |        |     |       |         |  |  |                                                                                                                                                                                                                                                                                                                                                                                                                                                                                                                                    |           |           |        |           |            |            |           |              |             |            |                                                  |   |                 |                                               |                           |
| 12.125                                                                                                                                                                                                                                                                                                                                                                                                                                                                                                                                                                                                                                                                                                                                                                                                                                                                                                                                                                                                                                                                                                                                                                                                                                                                                                                                                                                                                                                                                                                                                                                                                                                                                                       | 712%                 | 0.261   | Lip13a+Lip13b |         |                          |            |        |        |                        |        |         |       |                                                   |        |        |               |                                   |  |        |      |                    |     |  |  |           |      |       |     |           |  |        |     |            |     |  |  |       |      |       |     |  |  |        |    |       |     |  |  |        |     |       |     |  |  |       |      |       |     |  |  |        |     |       |     |  |  |        |     |       |     |  |  |        |     |       |      |  |  |       |      |         |        |  |  |        |     |       |     |  |  |       |      |         |        |  |  |        |    |       |         |  |  |         |    |       |          |  |  |        |     |       |        |  |  |        |     |       |         |  |  |                                                                                                                                                                                                                                                                                                                                                                                                                                                                                                                                    |           |           |        |           |            |            |           |              |             |            |                                                  |   |                 |                                               |                           |
| <table><tr><td colspan="4">DIAGNOSTICS</td></tr><tr><td>9</td><td>info's</td><td>RFALSI</td><td>11</td></tr><tr><td>4</td><td>info's</td><td>RFALSI</td><td>4</td></tr><tr><td>2</td><td>info's</td><td>TWOREG</td><td>8</td></tr></table>                                                                                                                                                                                                                                                                                                                                                                                                                                                                                                                                                                                                                                                                                                                                                                                                                                                                                                                                                                                                                                                                                                                                                                                                                                                                                                                                                                                                                                                                   | DIAGNOSTICS          |         |               |         | 9                        | info's     | RFALSI | 11     | 4                      | info's | RFALSI  | 4     | 2                                                 | info's | TWOREG | 8             |                                   |  |        |      |                    |     |  |  |           |      |       |     |           |  |        |     |            |     |  |  |       |      |       |     |  |  |        |    |       |     |  |  |        |     |       |     |  |  |       |      |       |     |  |  |        |     |       |     |  |  |        |     |       |     |  |  |        |     |       |      |  |  |       |      |         |        |  |  |        |     |       |     |  |  |       |      |         |        |  |  |        |    |       |         |  |  |         |    |       |          |  |  |        |     |       |        |  |  |        |     |       |         |  |  |                                                                                                                                                                                                                                                                                                                                                                                                                                                                                                                                    |           |           |        |           |            |            |           |              |             |            |                                                  |   |                 |                                               |                           |
| DIAGNOSTICS                                                                                                                                                                                                                                                                                                                                                                                                                                                                                                                                                                                                                                                                                                                                                                                                                                                                                                                                                                                                                                                                                                                                                                                                                                                                                                                                                                                                                                                                                                                                                                                                                                                                                                  |                      |         |               |         |                          |            |        |        |                        |        |         |       |                                                   |        |        |               |                                   |  |        |      |                    |     |  |  |           |      |       |     |           |  |        |     |            |     |  |  |       |      |       |     |  |  |        |    |       |     |  |  |        |     |       |     |  |  |       |      |       |     |  |  |        |     |       |     |  |  |        |     |       |     |  |  |        |     |       |      |  |  |       |      |         |        |  |  |        |     |       |     |  |  |       |      |         |        |  |  |        |    |       |         |  |  |         |    |       |          |  |  |        |     |       |        |  |  |        |     |       |         |  |  |                                                                                                                                                                                                                                                                                                                                                                                                                                                                                                                                    |           |           |        |           |            |            |           |              |             |            |                                                  |   |                 |                                               |                           |
| 9                                                                                                                                                                                                                                                                                                                                                                                                                                                                                                                                                                                                                                                                                                                                                                                                                                                                                                                                                                                                                                                                                                                                                                                                                                                                                                                                                                                                                                                                                                                                                                                                                                                                                                            | info's               | RFALSI  | 11            |         |                          |            |        |        |                        |        |         |       |                                                   |        |        |               |                                   |  |        |      |                    |     |  |  |           |      |       |     |           |  |        |     |            |     |  |  |       |      |       |     |  |  |        |    |       |     |  |  |        |     |       |     |  |  |       |      |       |     |  |  |        |     |       |     |  |  |        |     |       |     |  |  |        |     |       |      |  |  |       |      |         |        |  |  |        |     |       |     |  |  |       |      |         |        |  |  |        |    |       |         |  |  |         |    |       |          |  |  |        |     |       |        |  |  |        |     |       |         |  |  |                                                                                                                                                                                                                                                                                                                                                                                                                                                                                                                                    |           |           |        |           |            |            |           |              |             |            |                                                  |   |                 |                                               |                           |
| 4                                                                                                                                                                                                                                                                                                                                                                                                                                                                                                                                                                                                                                                                                                                                                                                                                                                                                                                                                                                                                                                                                                                                                                                                                                                                                                                                                                                                                                                                                                                                                                                                                                                                                                            | info's               | RFALSI  | 4             |         |                          |            |        |        |                        |        |         |       |                                                   |        |        |               |                                   |  |        |      |                    |     |  |  |           |      |       |     |           |  |        |     |            |     |  |  |       |      |       |     |  |  |        |    |       |     |  |  |        |     |       |     |  |  |       |      |       |     |  |  |        |     |       |     |  |  |        |     |       |     |  |  |        |     |       |      |  |  |       |      |         |        |  |  |        |     |       |     |  |  |       |      |         |        |  |  |        |    |       |         |  |  |         |    |       |          |  |  |        |     |       |        |  |  |        |     |       |         |  |  |                                                                                                                                                                                                                                                                                                                                                                                                                                                                                                                                    |           |           |        |           |            |            |           |              |             |            |                                                  |   |                 |                                               |                           |
| 2                                                                                                                                                                                                                                                                                                                                                                                                                                                                                                                                                                                                                                                                                                                                                                                                                                                                                                                                                                                                                                                                                                                                                                                                                                                                                                                                                                                                                                                                                                                                                                                                                                                                                                            | info's               | TWOREG  | 8             |         |                          |            |        |        |                        |        |         |       |                                                   |        |        |               |                                   |  |        |      |                    |     |  |  |           |      |       |     |           |  |        |     |            |     |  |  |       |      |       |     |  |  |        |    |       |     |  |  |        |     |       |     |  |  |       |      |       |     |  |  |        |     |       |     |  |  |        |     |       |     |  |  |        |     |       |      |  |  |       |      |         |        |  |  |        |     |       |     |  |  |       |      |         |        |  |  |        |    |       |         |  |  |         |    |       |          |  |  |        |     |       |        |  |  |        |     |       |         |  |  |                                                                                                                                                                                                                                                                                                                                                                                                                                                                                                                                    |           |           |        |           |            |            |           |              |             |            |                                                  |   |                 |                                               |                           |
| <table><tr><td colspan="4">MISCELLANEOUS OUTPUT</td></tr><tr><td colspan="4">FWHM = 0.092 ppm S/N = 3</td></tr><tr><td colspan="4">Data shift = 0.046 ppm</td></tr><tr><td colspan="4">Ph: 22 deg -2.3 deg/ppm</td></tr></table>                                                                                                                                                                                                                                                                                                                                                                                                                                                                                                                                                                                                                                                                                                                                                                                                                                                                                                                                                                                                                                                                                                                                                                                                                                                                                                                                                                                                                                                                             | MISCELLANEOUS OUTPUT |         |               |         | FWHM = 0.092 ppm S/N = 3 |            |        |        | Data shift = 0.046 ppm |        |         |       | Ph: 22 deg -2.3 deg/ppm                           |        |        |               |                                   |  |        |      |                    |     |  |  |           |      |       |     |           |  |        |     |            |     |  |  |       |      |       |     |  |  |        |    |       |     |  |  |        |     |       |     |  |  |       |      |       |     |  |  |        |     |       |     |  |  |        |     |       |     |  |  |        |     |       |      |  |  |       |      |         |        |  |  |        |     |       |     |  |  |       |      |         |        |  |  |        |    |       |         |  |  |         |    |       |          |  |  |        |     |       |        |  |  |        |     |       |         |  |  |                                                                                                                                                                                                                                                                                                                                                                                                                                                                                                                                    |           |           |        |           |            |            |           |              |             |            |                                                  |   |                 |                                               |                           |
| MISCELLANEOUS OUTPUT                                                                                                                                                                                                                                                                                                                                                                                                                                                                                                                                                                                                                                                                                                                                                                                                                                                                                                                                                                                                                                                                                                                                                                                                                                                                                                                                                                                                                                                                                                                                                                                                                                                                                         |                      |         |               |         |                          |            |        |        |                        |        |         |       |                                                   |        |        |               |                                   |  |        |      |                    |     |  |  |           |      |       |     |           |  |        |     |            |     |  |  |       |      |       |     |  |  |        |    |       |     |  |  |        |     |       |     |  |  |       |      |       |     |  |  |        |     |       |     |  |  |        |     |       |     |  |  |        |     |       |      |  |  |       |      |         |        |  |  |        |     |       |     |  |  |       |      |         |        |  |  |        |    |       |         |  |  |         |    |       |          |  |  |        |     |       |        |  |  |        |     |       |         |  |  |                                                                                                                                                                                                                                                                                                                                                                                                                                                                                                                                    |           |           |        |           |            |            |           |              |             |            |                                                  |   |                 |                                               |                           |
| FWHM = 0.092 ppm S/N = 3                                                                                                                                                                                                                                                                                                                                                                                                                                                                                                                                                                                                                                                                                                                                                                                                                                                                                                                                                                                                                                                                                                                                                                                                                                                                                                                                                                                                                                                                                                                                                                                                                                                                                     |                      |         |               |         |                          |            |        |        |                        |        |         |       |                                                   |        |        |               |                                   |  |        |      |                    |     |  |  |           |      |       |     |           |  |        |     |            |     |  |  |       |      |       |     |  |  |        |    |       |     |  |  |        |     |       |     |  |  |       |      |       |     |  |  |        |     |       |     |  |  |        |     |       |     |  |  |        |     |       |      |  |  |       |      |         |        |  |  |        |     |       |     |  |  |       |      |         |        |  |  |        |    |       |         |  |  |         |    |       |          |  |  |        |     |       |        |  |  |        |     |       |         |  |  |                                                                                                                                                                                                                                                                                                                                                                                                                                                                                                                                    |           |           |        |           |            |            |           |              |             |            |                                                  |   |                 |                                               |                           |
| Data shift = 0.046 ppm                                                                                                                                                                                                                                                                                                                                                                                                                                                                                                                                                                                                                                                                                                                                                                                                                                                                                                                                                                                                                                                                                                                                                                                                                                                                                                                                                                                                                                                                                                                                                                                                                                                                                       |                      |         |               |         |                          |            |        |        |                        |        |         |       |                                                   |        |        |               |                                   |  |        |      |                    |     |  |  |           |      |       |     |           |  |        |     |            |     |  |  |       |      |       |     |  |  |        |    |       |     |  |  |        |     |       |     |  |  |       |      |       |     |  |  |        |     |       |     |  |  |        |     |       |     |  |  |        |     |       |      |  |  |       |      |         |        |  |  |        |     |       |     |  |  |       |      |         |        |  |  |        |    |       |         |  |  |         |    |       |          |  |  |        |     |       |        |  |  |        |     |       |         |  |  |                                                                                                                                                                                                                                                                                                                                                                                                                                                                                                                                    |           |           |        |           |            |            |           |              |             |            |                                                  |   |                 |                                               |                           |
| Ph: 22 deg -2.3 deg/ppm                                                                                                                                                                                                                                                                                                                                                                                                                                                                                                                                                                                                                                                                                                                                                                                                                                                                                                                                                                                                                                                                                                                                                                                                                                                                                                                                                                                                                                                                                                                                                                                                                                                                                      |                      |         |               |         |                          |            |        |        |                        |        |         |       |                                                   |        |        |               |                                   |  |        |      |                    |     |  |  |           |      |       |     |           |  |        |     |            |     |  |  |       |      |       |     |  |  |        |    |       |     |  |  |        |     |       |     |  |  |       |      |       |     |  |  |        |     |       |     |  |  |        |     |       |     |  |  |        |     |       |      |  |  |       |      |         |        |  |  |        |     |       |     |  |  |       |      |         |        |  |  |        |    |       |         |  |  |         |    |       |          |  |  |        |     |       |        |  |  |        |     |       |         |  |  |                                                                                                                                                                                                                                                                                                                                                                                                                                                                                                                                    |           |           |        |           |            |            |           |              |             |            |                                                  |   |                 |                                               |                           |
| <table><tr><td colspan="4">INPUT CHANGES</td></tr><tr><td colspan="4">deltat= 5.000e-04</td></tr><tr><td colspan="4">echot= 288.00</td></tr><tr><td colspan="4">filbas= '/home/stu111733/.lcmmodel/basis-sets/gam</td></tr><tr><td colspan="4">ma_press_te288_128mhz_662d.basis'</td></tr><tr><td colspan="4">hzpppm= 1.2776e+02</td></tr><tr><td colspan="4">icolen= 7</td></tr><tr><td colspan="4">icolst= 2</td></tr><tr><td colspan="4">irowen= 11</td></tr></table>                                                                                                                                                                                                                                                                                                                                                                                                                                                                                                                                                                                                                                                                                                                                                                                                                                                                                                                                                                                                                                                                                                                                                                                                                                     | INPUT CHANGES        |         |               |         | deltat= 5.000e-04        |            |        |        | echot= 288.00          |        |         |       | filbas= '/home/stu111733/.lcmmodel/basis-sets/gam |        |        |               | ma_press_te288_128mhz_662d.basis' |  |        |      | hzpppm= 1.2776e+02 |     |  |  | icolen= 7 |      |       |     | icolst= 2 |  |        |     | irowen= 11 |     |  |  |       |      |       |     |  |  |        |    |       |     |  |  |        |     |       |     |  |  |       |      |       |     |  |  |        |     |       |     |  |  |        |     |       |     |  |  |        |     |       |      |  |  |       |      |         |        |  |  |        |     |       |     |  |  |       |      |         |        |  |  |        |    |       |         |  |  |         |    |       |          |  |  |        |     |       |        |  |  |        |     |       |         |  |  |                                                                                                                                                                                                                                                                                                                                                                                                                                                                                                                                    |           |           |        |           |            |            |           |              |             |            |                                                  |   |                 |                                               |                           |
| INPUT CHANGES                                                                                                                                                                                                                                                                                                                                                                                                                                                                                                                                                                                                                                                                                                                                                                                                                                                                                                                                                                                                                                                                                                                                                                                                                                                                                                                                                                                                                                                                                                                                                                                                                                                                                                |                      |         |               |         |                          |            |        |        |                        |        |         |       |                                                   |        |        |               |                                   |  |        |      |                    |     |  |  |           |      |       |     |           |  |        |     |            |     |  |  |       |      |       |     |  |  |        |    |       |     |  |  |        |     |       |     |  |  |       |      |       |     |  |  |        |     |       |     |  |  |        |     |       |     |  |  |        |     |       |      |  |  |       |      |         |        |  |  |        |     |       |     |  |  |       |      |         |        |  |  |        |    |       |         |  |  |         |    |       |          |  |  |        |     |       |        |  |  |        |     |       |         |  |  |                                                                                                                                                                                                                                                                                                                                                                                                                                                                                                                                    |           |           |        |           |            |            |           |              |             |            |                                                  |   |                 |                                               |                           |
| deltat= 5.000e-04                                                                                                                                                                                                                                                                                                                                                                                                                                                                                                                                                                                                                                                                                                                                                                                                                                                                                                                                                                                                                                                                                                                                                                                                                                                                                                                                                                                                                                                                                                                                                                                                                                                                                            |                      |         |               |         |                          |            |        |        |                        |        |         |       |                                                   |        |        |               |                                   |  |        |      |                    |     |  |  |           |      |       |     |           |  |        |     |            |     |  |  |       |      |       |     |  |  |        |    |       |     |  |  |        |     |       |     |  |  |       |      |       |     |  |  |        |     |       |     |  |  |        |     |       |     |  |  |        |     |       |      |  |  |       |      |         |        |  |  |        |     |       |     |  |  |       |      |         |        |  |  |        |    |       |         |  |  |         |    |       |          |  |  |        |     |       |        |  |  |        |     |       |         |  |  |                                                                                                                                                                                                                                                                                                                                                                                                                                                                                                                                    |           |           |        |           |            |            |           |              |             |            |                                                  |   |                 |                                               |                           |
| echot= 288.00                                                                                                                                                                                                                                                                                                                                                                                                                                                                                                                                                                                                                                                                                                                                                                                                                                                                                                                                                                                                                                                                                                                                                                                                                                                                                                                                                                                                                                                                                                                                                                                                                                                                                                |                      |         |               |         |                          |            |        |        |                        |        |         |       |                                                   |        |        |               |                                   |  |        |      |                    |     |  |  |           |      |       |     |           |  |        |     |            |     |  |  |       |      |       |     |  |  |        |    |       |     |  |  |        |     |       |     |  |  |       |      |       |     |  |  |        |     |       |     |  |  |        |     |       |     |  |  |        |     |       |      |  |  |       |      |         |        |  |  |        |     |       |     |  |  |       |      |         |        |  |  |        |    |       |         |  |  |         |    |       |          |  |  |        |     |       |        |  |  |        |     |       |         |  |  |                                                                                                                                                                                                                                                                                                                                                                                                                                                                                                                                    |           |           |        |           |            |            |           |              |             |            |                                                  |   |                 |                                               |                           |
| filbas= '/home/stu111733/.lcmmodel/basis-sets/gam                                                                                                                                                                                                                                                                                                                                                                                                                                                                                                                                                                                                                                                                                                                                                                                                                                                                                                                                                                                                                                                                                                                                                                                                                                                                                                                                                                                                                                                                                                                                                                                                                                                            |                      |         |               |         |                          |            |        |        |                        |        |         |       |                                                   |        |        |               |                                   |  |        |      |                    |     |  |  |           |      |       |     |           |  |        |     |            |     |  |  |       |      |       |     |  |  |        |    |       |     |  |  |        |     |       |     |  |  |       |      |       |     |  |  |        |     |       |     |  |  |        |     |       |     |  |  |        |     |       |      |  |  |       |      |         |        |  |  |        |     |       |     |  |  |       |      |         |        |  |  |        |    |       |         |  |  |         |    |       |          |  |  |        |     |       |        |  |  |        |     |       |         |  |  |                                                                                                                                                                                                                                                                                                                                                                                                                                                                                                                                    |           |           |        |           |            |            |           |              |             |            |                                                  |   |                 |                                               |                           |
| ma_press_te288_128mhz_662d.basis'                                                                                                                                                                                                                                                                                                                                                                                                                                                                                                                                                                                                                                                                                                                                                                                                                                                                                                                                                                                                                                                                                                                                                                                                                                                                                                                                                                                                                                                                                                                                                                                                                                                                            |                      |         |               |         |                          |            |        |        |                        |        |         |       |                                                   |        |        |               |                                   |  |        |      |                    |     |  |  |           |      |       |     |           |  |        |     |            |     |  |  |       |      |       |     |  |  |        |    |       |     |  |  |        |     |       |     |  |  |       |      |       |     |  |  |        |     |       |     |  |  |        |     |       |     |  |  |        |     |       |      |  |  |       |      |         |        |  |  |        |     |       |     |  |  |       |      |         |        |  |  |        |    |       |         |  |  |         |    |       |          |  |  |        |     |       |        |  |  |        |     |       |         |  |  |                                                                                                                                                                                                                                                                                                                                                                                                                                                                                                                                    |           |           |        |           |            |            |           |              |             |            |                                                  |   |                 |                                               |                           |
| hzpppm= 1.2776e+02                                                                                                                                                                                                                                                                                                                                                                                                                                                                                                                                                                                                                                                                                                                                                                                                                                                                                                                                                                                                                                                                                                                                                                                                                                                                                                                                                                                                                                                                                                                                                                                                                                                                                           |                      |         |               |         |                          |            |        |        |                        |        |         |       |                                                   |        |        |               |                                   |  |        |      |                    |     |  |  |           |      |       |     |           |  |        |     |            |     |  |  |       |      |       |     |  |  |        |    |       |     |  |  |        |     |       |     |  |  |       |      |       |     |  |  |        |     |       |     |  |  |        |     |       |     |  |  |        |     |       |      |  |  |       |      |         |        |  |  |        |     |       |     |  |  |       |      |         |        |  |  |        |    |       |         |  |  |         |    |       |          |  |  |        |     |       |        |  |  |        |     |       |         |  |  |                                                                                                                                                                                                                                                                                                                                                                                                                                                                                                                                    |           |           |        |           |            |            |           |              |             |            |                                                  |   |                 |                                               |                           |
| icolen= 7                                                                                                                                                                                                                                                                                                                                                                                                                                                                                                                                                                                                                                                                                                                                                                                                                                                                                                                                                                                                                                                                                                                                                                                                                                                                                                                                                                                                                                                                                                                                                                                                                                                                                                    |                      |         |               |         |                          |            |        |        |                        |        |         |       |                                                   |        |        |               |                                   |  |        |      |                    |     |  |  |           |      |       |     |           |  |        |     |            |     |  |  |       |      |       |     |  |  |        |    |       |     |  |  |        |     |       |     |  |  |       |      |       |     |  |  |        |     |       |     |  |  |        |     |       |     |  |  |        |     |       |      |  |  |       |      |         |        |  |  |        |     |       |     |  |  |       |      |         |        |  |  |        |    |       |         |  |  |         |    |       |          |  |  |        |     |       |        |  |  |        |     |       |         |  |  |                                                                                                                                                                                                                                                                                                                                                                                                                                                                                                                                    |           |           |        |           |            |            |           |              |             |            |                                                  |   |                 |                                               |                           |
| icolst= 2                                                                                                                                                                                                                                                                                                                                                                                                                                                                                                                                                                                                                                                                                                                                                                                                                                                                                                                                                                                                                                                                                                                                                                                                                                                                                                                                                                                                                                                                                                                                                                                                                                                                                                    |                      |         |               |         |                          |            |        |        |                        |        |         |       |                                                   |        |        |               |                                   |  |        |      |                    |     |  |  |           |      |       |     |           |  |        |     |            |     |  |  |       |      |       |     |  |  |        |    |       |     |  |  |        |     |       |     |  |  |       |      |       |     |  |  |        |     |       |     |  |  |        |     |       |     |  |  |        |     |       |      |  |  |       |      |         |        |  |  |        |     |       |     |  |  |       |      |         |        |  |  |        |    |       |         |  |  |         |    |       |          |  |  |        |     |       |        |  |  |        |     |       |         |  |  |                                                                                                                                                                                                                                                                                                                                                                                                                                                                                                                                    |           |           |        |           |            |            |           |              |             |            |                                                  |   |                 |                                               |                           |
| irowen= 11                                                                                                                                                                                                                                                                                                                                                                                                                                                                                                                                                                                                                                                                                                                                                                                                                                                                                                                                                                                                                                                                                                                                                                                                                                                                                                                                                                                                                                                                                                                                                                                                                                                                                                   |                      |         |               |         |                          |            |        |        |                        |        |         |       |                                                   |        |        |               |                                   |  |        |      |                    |     |  |  |           |      |       |     |           |  |        |     |            |     |  |  |       |      |       |     |  |  |        |    |       |     |  |  |        |     |       |     |  |  |       |      |       |     |  |  |        |     |       |     |  |  |        |     |       |     |  |  |        |     |       |      |  |  |       |      |         |        |  |  |        |     |       |     |  |  |       |      |         |        |  |  |        |    |       |         |  |  |         |    |       |          |  |  |        |     |       |        |  |  |        |     |       |         |  |  |                                                                                                                                                                                                                                                                                                                                                                                                                                                                                                                                    |           |           |        |           |            |            |           |              |             |            |                                                  |   |                 |                                               |                           |

P19 - tumor  
voxel 12;7

Row#12 Col#7 MR Hirn (2019.01.09 17:36:15) Subject 10 7.86e-01 mL, TE/TR/NS=288/1500/3 (s2DSI\_TE288 TR1500)

Data of: Sektion Biomedizinische Bildgebung, Christian-Albrechts-Universitaet zu Kiel

LCModel (Version 6.3-1J) Copyright: S.W. Provencher.

Ref.: Magn. Reson. Med. 30:672-679 (1993).

14-June-2019 17:23

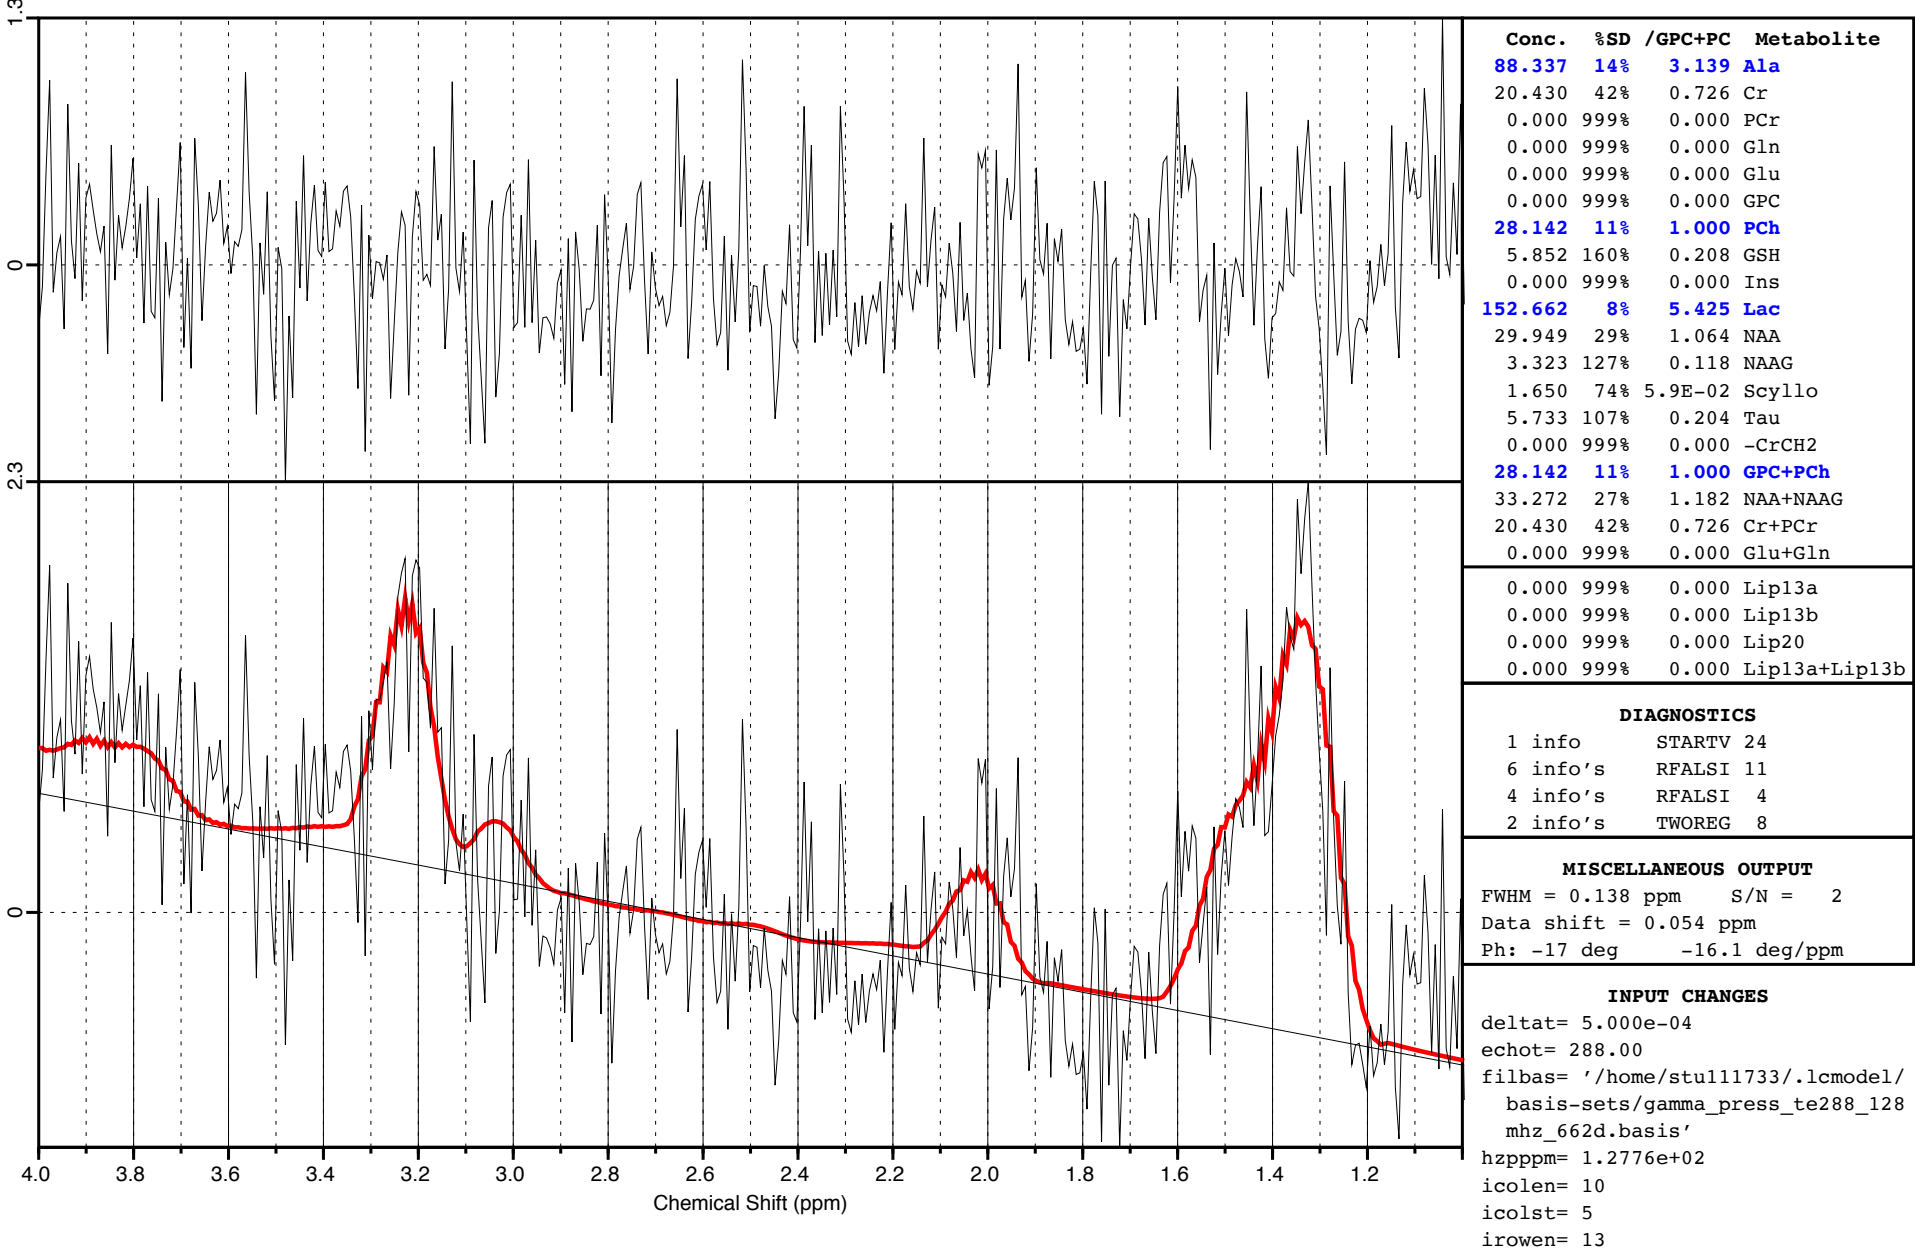

Row#12 Col#7 MR Hirn (2019.01.09 17:36:15) Subject 10 7.86e-01 mL, TE/TR/NS=288/1500/3 (s2DSI\_TE288 TR1500)

Data of: *Sektion Biomedizinische Bildgebung, Christian-Albrechts-Universitaet zu Kiel*

LCModel (Version 6.3-1J) Copyright: S.W. Provencher.

Ref.: *Magn. Reson. Med. 30:672-679 (1993).*

14-June-2019 17:23

|                                                                                                                                                                                                                                                                                                                                                                                                                                                                                                                                                                                                                                                                                                                                                                                                                                                                                                                                                                                                                                                                                                                                                                                                                                                                                                                                                                                                                                                                                                                                                                                                                                                                                                                                                                                                                                                                                                                                                                                                                                                                                                                                                                                                                                                                                                                                                                                                                                                                                                                                                                                                                                                                                                                            |                                                                                                                                                                                                                                                                                                                       |                                                                                                                                                                                   |                                                                                                                                                                                                                                                                           |
|----------------------------------------------------------------------------------------------------------------------------------------------------------------------------------------------------------------------------------------------------------------------------------------------------------------------------------------------------------------------------------------------------------------------------------------------------------------------------------------------------------------------------------------------------------------------------------------------------------------------------------------------------------------------------------------------------------------------------------------------------------------------------------------------------------------------------------------------------------------------------------------------------------------------------------------------------------------------------------------------------------------------------------------------------------------------------------------------------------------------------------------------------------------------------------------------------------------------------------------------------------------------------------------------------------------------------------------------------------------------------------------------------------------------------------------------------------------------------------------------------------------------------------------------------------------------------------------------------------------------------------------------------------------------------------------------------------------------------------------------------------------------------------------------------------------------------------------------------------------------------------------------------------------------------------------------------------------------------------------------------------------------------------------------------------------------------------------------------------------------------------------------------------------------------------------------------------------------------------------------------------------------------------------------------------------------------------------------------------------------------------------------------------------------------------------------------------------------------------------------------------------------------------------------------------------------------------------------------------------------------------------------------------------------------------------------------------------------------|-----------------------------------------------------------------------------------------------------------------------------------------------------------------------------------------------------------------------------------------------------------------------------------------------------------------------|-----------------------------------------------------------------------------------------------------------------------------------------------------------------------------------|---------------------------------------------------------------------------------------------------------------------------------------------------------------------------------------------------------------------------------------------------------------------------|
| <div><div><div><div><div>Conc.</div><div>%SD</div><div>/GPC+PC</div><div>Metabolite</div></div><div><div>88.337</div><div>14%</div><div>3.139</div><div>Ala</div></div></div><div><div>20.430</div><div>42%</div><div>0.726</div><div>Cr</div></div><div><div>0.000</div><div>999%</div><div>0.000</div><div>PCr</div></div><div><div>0.000</div><div>999%</div><div>0.000</div><div>Gln</div></div><div><div>0.000</div><div>999%</div><div>0.000</div><div>Glu</div></div><div><div>0.000</div><div>999%</div><div>0.000</div><div>GPC</div></div><div><div>28.142</div><div>11%</div><div>1.000</div><div>PCh</div></div><div><div>5.852</div><div>160%</div><div>0.208</div><div>GSH</div></div><div><div>0.000</div><div>999%</div><div>0.000</div><div>Ins</div></div><div><div>152.662</div><div>8%</div><div>5.425</div><div>Lac</div></div><div><div>29.949</div><div>29%</div><div>1.064</div><div>NAA</div></div><div><div>3.323</div><div>127%</div><div>0.118</div><div>NAAG</div></div><div><div>1.650</div><div>74%</div><div>5.9E-02</div><div>Scyllo</div></div><div><div>5.733</div><div>107%</div><div>0.204</div><div>Tau</div></div><div><div>0.000</div><div>999%</div><div>0.000</div><div>-CrCH2</div></div><div><div>28.142</div><div>11%</div><div>1.000</div><div>GPC+PCh</div></div><div><div>33.272</div><div>27%</div><div>1.182</div><div>NAA+NAAG</div></div><div><div>20.430</div><div>42%</div><div>0.726</div><div>Cr+PCr</div></div><div><div>0.000</div><div>999%</div><div>0.000</div><div>Glu+Gln</div></div></div><div><div>0.000</div><div>999%</div><div>0.000</div><div>Lip13a</div></div><div><div>0.000</div><div>999%</div><div>0.000</div><div>Lip13b</div></div><div><div>0.000</div><div>999%</div><div>0.000</div><div>Lip20</div></div><div><div>0.000</div><div>999%</div><div>0.000</div><div>Lip13a+Lip13b</div></div></div> <tr><td><div><div>DIAGNOSTICS</div><div><div>1</div><div>info</div><div>STARTV</div><div>24</div></div><div><div>6</div><div>info's</div><div>RFALSI</div><div>11</div></div><div><div>4</div><div>info's</div><div>RFALSI</div><div>4</div></div><div><div>2</div><div>info's</div><div>TWOREG</div><div>8</div></div></div></td></tr> <tr><td><div><div>MISCELLANEOUS OUTPUT</div><div><div>FWHM = 0.138 ppm</div><div>S/N = 2</div><div>Data shift = 0.054 ppm</div><div>Ph: -17 deg</div><div>-16.1 deg/ppm</div></div></div></td></tr> <tr><td><div><div>INPUT CHANGES</div><div><div>deltat= 5.000e-04</div><div>echot= 288.00</div><div>filbas= '/home/stu111733/.lcmodel/basis-sets/gam<br/>ma_press_te288_128mhz_662d.basis'</div><div>hzpppm= 1.2776e+02</div><div>icolen= 10</div><div>icolst= 5</div></div></div></td></tr> | <div><div>DIAGNOSTICS</div><div><div>1</div><div>info</div><div>STARTV</div><div>24</div></div><div><div>6</div><div>info's</div><div>RFALSI</div><div>11</div></div><div><div>4</div><div>info's</div><div>RFALSI</div><div>4</div></div><div><div>2</div><div>info's</div><div>TWOREG</div><div>8</div></div></div> | <div><div>MISCELLANEOUS OUTPUT</div><div><div>FWHM = 0.138 ppm</div><div>S/N = 2</div><div>Data shift = 0.054 ppm</div><div>Ph: -17 deg</div><div>-16.1 deg/ppm</div></div></div> | <div><div>INPUT CHANGES</div><div><div>deltat= 5.000e-04</div><div>echot= 288.00</div><div>filbas= '/home/stu111733/.lcmodel/basis-sets/gam<br/>ma_press_te288_128mhz_662d.basis'</div><div>hzpppm= 1.2776e+02</div><div>icolen= 10</div><div>icolst= 5</div></div></div> |
| <div><div>DIAGNOSTICS</div><div><div>1</div><div>info</div><div>STARTV</div><div>24</div></div><div><div>6</div><div>info's</div><div>RFALSI</div><div>11</div></div><div><div>4</div><div>info's</div><div>RFALSI</div><div>4</div></div><div><div>2</div><div>info's</div><div>TWOREG</div><div>8</div></div></div>                                                                                                                                                                                                                                                                                                                                                                                                                                                                                                                                                                                                                                                                                                                                                                                                                                                                                                                                                                                                                                                                                                                                                                                                                                                                                                                                                                                                                                                                                                                                                                                                                                                                                                                                                                                                                                                                                                                                                                                                                                                                                                                                                                                                                                                                                                                                                                                                      |                                                                                                                                                                                                                                                                                                                       |                                                                                                                                                                                   |                                                                                                                                                                                                                                                                           |
| <div><div>MISCELLANEOUS OUTPUT</div><div><div>FWHM = 0.138 ppm</div><div>S/N = 2</div><div>Data shift = 0.054 ppm</div><div>Ph: -17 deg</div><div>-16.1 deg/ppm</div></div></div>                                                                                                                                                                                                                                                                                                                                                                                                                                                                                                                                                                                                                                                                                                                                                                                                                                                                                                                                                                                                                                                                                                                                                                                                                                                                                                                                                                                                                                                                                                                                                                                                                                                                                                                                                                                                                                                                                                                                                                                                                                                                                                                                                                                                                                                                                                                                                                                                                                                                                                                                          |                                                                                                                                                                                                                                                                                                                       |                                                                                                                                                                                   |                                                                                                                                                                                                                                                                           |
| <div><div>INPUT CHANGES</div><div><div>deltat= 5.000e-04</div><div>echot= 288.00</div><div>filbas= '/home/stu111733/.lcmodel/basis-sets/gam<br/>ma_press_te288_128mhz_662d.basis'</div><div>hzpppm= 1.2776e+02</div><div>icolen= 10</div><div>icolst= 5</div></div></div>                                                                                                                                                                                                                                                                                                                                                                                                                                                                                                                                                                                                                                                                                                                                                                                                                                                                                                                                                                                                                                                                                                                                                                                                                                                                                                                                                                                                                                                                                                                                                                                                                                                                                                                                                                                                                                                                                                                                                                                                                                                                                                                                                                                                                                                                                                                                                                                                                                                  |                                                                                                                                                                                                                                                                                                                       |                                                                                                                                                                                   |                                                                                                                                                                                                                                                                           |

irowen= 13

irowst= 9

islice= 1

lps= 8

ltable= 7

ndcols= 11

ndrows= 14

ndslic= 1

nunfil= 1024

ppmend= 1.0

ppmst= 4.0

savdir= '/home/data/Studies/GBM\_Spektro/results/  
'

sptype= 'tumor'

srcraw= '/home/data/Studies/GBM\_Spektro/data/  
s10288\_5\_1\_raw\_act.SDAT'

# P19 - edema voxel 10;10

Row#10 Col#10 MR Hirn (2019.01.09 17:36:15) Subject 10 7.86e-01 mL, TE/TR/NS=288/1500/3 (s2DSI\_TE288 TR1500)

Data of: Sektion Biomedizinische Bildgebung, Christian-Albrechts-Universitaet zu Kiel

LCModel (Version 6.3-1J) Copyright: S.W. Provencher.

Ref.: Magn. Reson. Med. 30:672-679 (1993).

14-June-2019 17:24

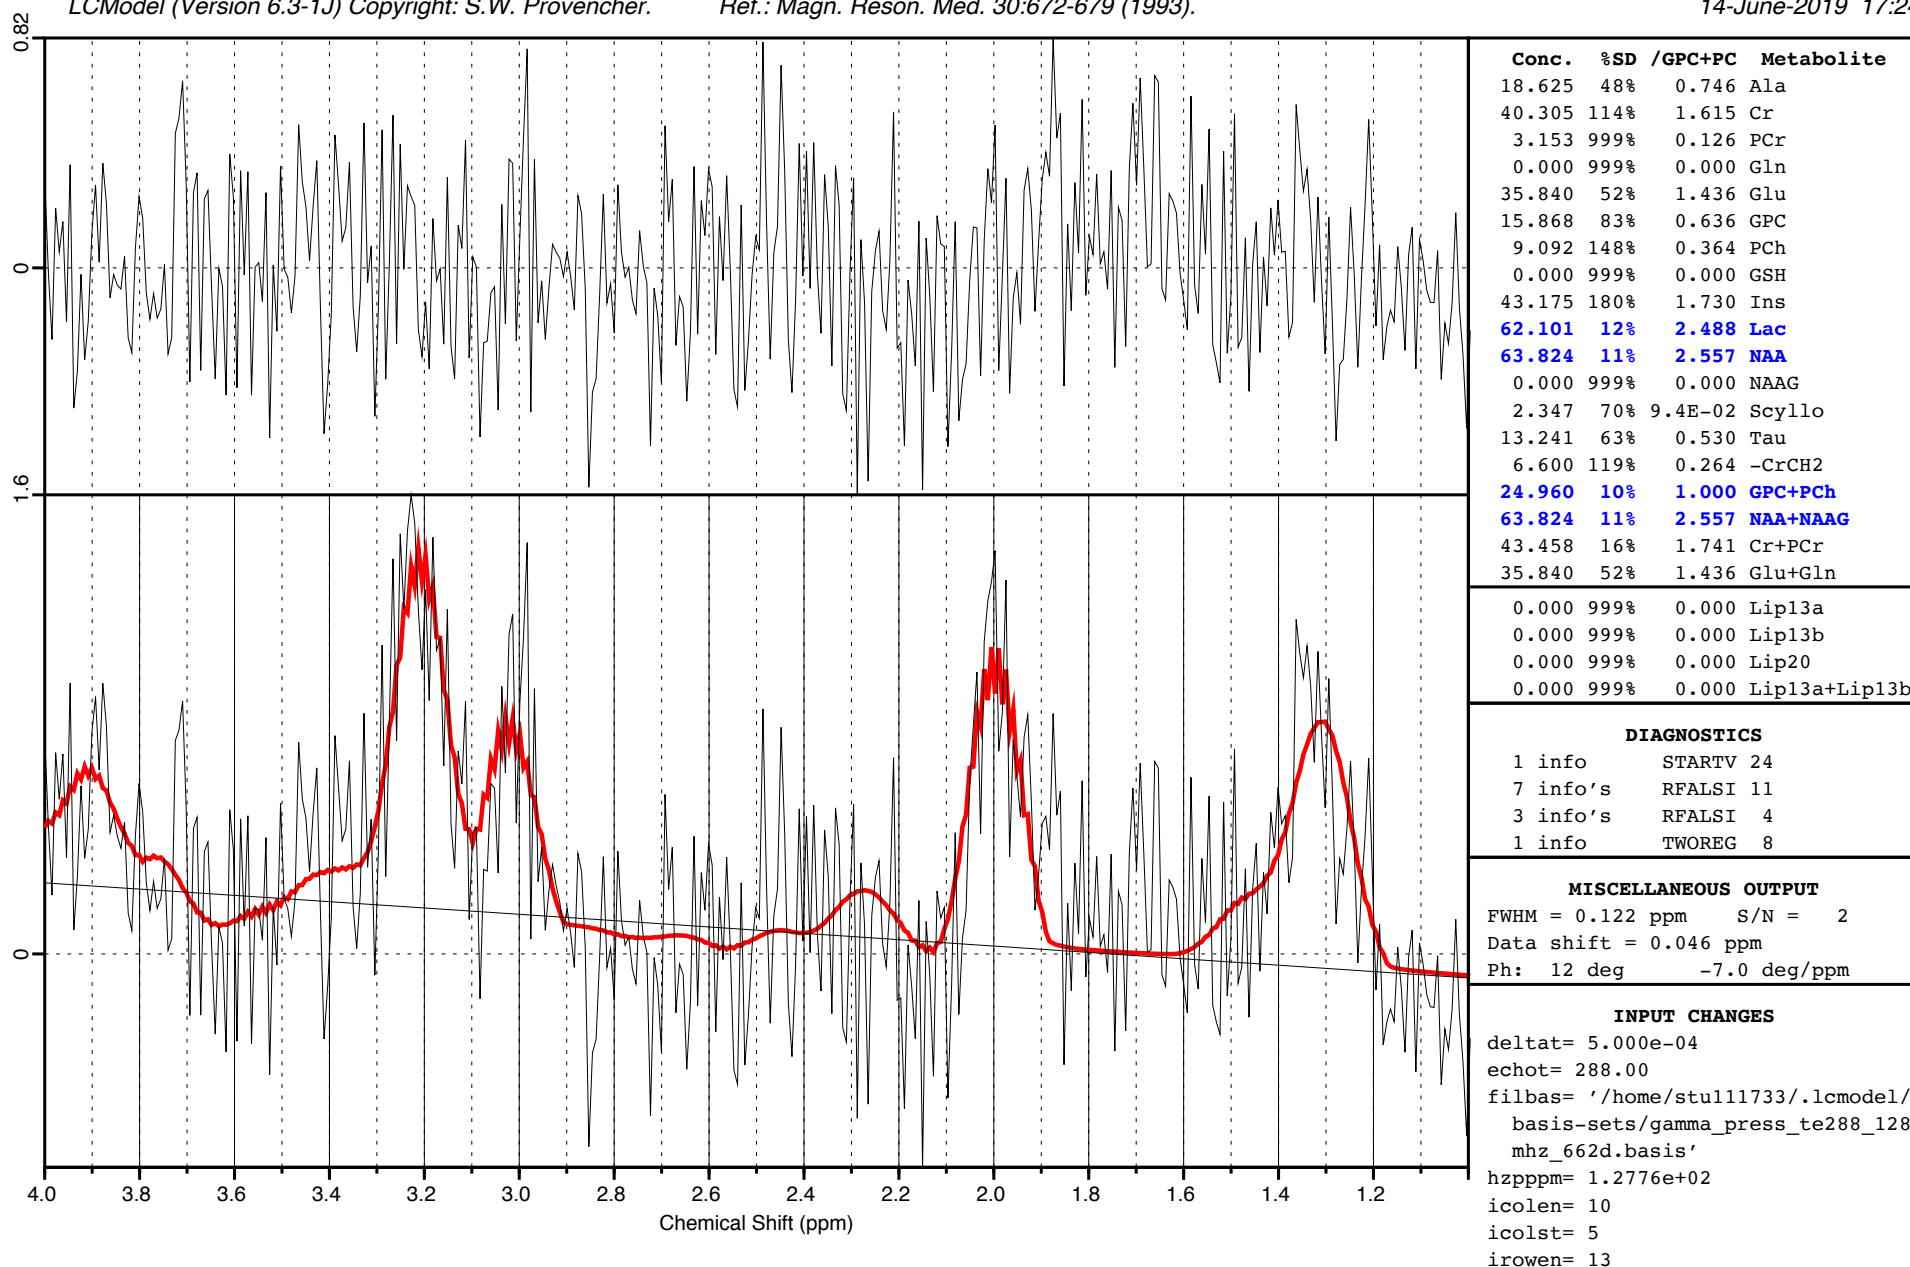

| <table><tr><th>Conc.</th><th>%SD</th><th>/GPC+PC</th><th>Metabolite</th></tr><tr><td>18.625</td><td>48%</td><td>0.746</td><td>Ala</td></tr><tr><td>40.305</td><td>114%</td><td>1.615</td><td>Cr</td></tr><tr><td>3.153</td><td>999%</td><td>0.126</td><td>PCr</td></tr><tr><td>0.000</td><td>999%</td><td>0.000</td><td>Gln</td></tr><tr><td>35.840</td><td>52%</td><td>1.436</td><td>Glu</td></tr><tr><td>15.868</td><td>83%</td><td>0.636</td><td>GPC</td></tr><tr><td>9.092</td><td>148%</td><td>0.364</td><td>PCh</td></tr><tr><td>0.000</td><td>999%</td><td>0.000</td><td>GSH</td></tr><tr><td>43.175</td><td>180%</td><td>1.730</td><td>Ins</td></tr><tr><td>62.101</td><td>12%</td><td>2.488</td><td>Lac</td></tr><tr><td>63.824</td><td>11%</td><td>2.557</td><td>NAA</td></tr><tr><td>0.000</td><td>999%</td><td>0.000</td><td>NAAG</td></tr><tr><td>2.347</td><td>70%</td><td>9.4E-02</td><td>Scyllo</td></tr><tr><td>13.241</td><td>63%</td><td>0.530</td><td>Tau</td></tr><tr><td>6.600</td><td>119%</td><td>0.264</td><td>-CrCH2</td></tr><tr><td>24.960</td><td>10%</td><td>1.000</td><td>GPC+PCh</td></tr><tr><td>63.824</td><td>11%</td><td>2.557</td><td>NAA+NAAG</td></tr><tr><td>43.458</td><td>16%</td><td>1.741</td><td>Cr+PCr</td></tr><tr><td>35.840</td><td>52%</td><td>1.436</td><td>Glu+Gln</td></tr></table> | Conc.                | %SD     | /GPC+PC                  | Metabolite | 18.625                 | 48%       | 0.746                                            | Ala          | 40.305                            | 114%     | 1.615              | Cr    | 3.153      | 999% | 0.126     | PCr           | 0.000 | 999% | 0.000 | Gln | 35.840 | 52% | 1.436 | Glu | 15.868 | 83% | 0.636 | GPC | 9.092 | 148% | 0.364 | PCh | 0.000 | 999% | 0.000 | GSH | 43.175 | 180% | 1.730 | Ins | 62.101 | 12% | 2.488 | Lac | 63.824 | 11% | 2.557 | NAA | 0.000 | 999% | 0.000 | NAAG | 2.347 | 70% | 9.4E-02 | Scyllo | 13.241 | 63% | 0.530 | Tau | 6.600 | 119% | 0.264 | -CrCH2 | 24.960 | 10% | 1.000 | GPC+PCh | 63.824 | 11% | 2.557 | NAA+NAAG | 43.458 | 16% | 1.741 | Cr+PCr | 35.840 | 52% | 1.436 | Glu+Gln | <table><tr><td>irowen= 13</td></tr><tr><td>irowst= 9</td></tr><tr><td>islice= 1</td></tr><tr><td>lps= 8</td></tr><tr><td>ltable= 7</td></tr><tr><td>ndcols= 11</td></tr><tr><td>ndrows= 14</td></tr><tr><td>ndslic= 1</td></tr><tr><td>nunfil= 1024</td></tr><tr><td>ppmend= 1.0</td></tr><tr><td>ppmst= 4.0</td></tr><tr><td>savdir= '/home/data/Studies/GBM_Spektro/results/</td></tr><tr><td>,</td></tr><tr><td>sptype= 'tumor'</td></tr><tr><td>srcraw= '/home/data/Studies/GBM_Spektro/data/</td></tr><tr><td>st0288_5_1_raw_act.SDAT'</td></tr></table> | irowen= 13 | irowst= 9 | islice= 1 | lps= 8 | ltable= 7 | ndcols= 11 | ndrows= 14 | ndslic= 1 | nunfil= 1024 | ppmend= 1.0 | ppmst= 4.0 | savdir= '/home/data/Studies/GBM_Spektro/results/ | , | sptype= 'tumor' | srcraw= '/home/data/Studies/GBM_Spektro/data/ | st0288_5_1_raw_act.SDAT' |
|------------------------------------------------------------------------------------------------------------------------------------------------------------------------------------------------------------------------------------------------------------------------------------------------------------------------------------------------------------------------------------------------------------------------------------------------------------------------------------------------------------------------------------------------------------------------------------------------------------------------------------------------------------------------------------------------------------------------------------------------------------------------------------------------------------------------------------------------------------------------------------------------------------------------------------------------------------------------------------------------------------------------------------------------------------------------------------------------------------------------------------------------------------------------------------------------------------------------------------------------------------------------------------------------------------------------------------------|----------------------|---------|--------------------------|------------|------------------------|-----------|--------------------------------------------------|--------------|-----------------------------------|----------|--------------------|-------|------------|------|-----------|---------------|-------|------|-------|-----|--------|-----|-------|-----|--------|-----|-------|-----|-------|------|-------|-----|-------|------|-------|-----|--------|------|-------|-----|--------|-----|-------|-----|--------|-----|-------|-----|-------|------|-------|------|-------|-----|---------|--------|--------|-----|-------|-----|-------|------|-------|--------|--------|-----|-------|---------|--------|-----|-------|----------|--------|-----|-------|--------|--------|-----|-------|---------|---------------------------------------------------------------------------------------------------------------------------------------------------------------------------------------------------------------------------------------------------------------------------------------------------------------------------------------------------------------------------------------------------------------------------------------------------------------------------------------------------------------------------------------------------------------|------------|-----------|-----------|--------|-----------|------------|------------|-----------|--------------|-------------|------------|--------------------------------------------------|---|-----------------|-----------------------------------------------|--------------------------|
| Conc.                                                                                                                                                                                                                                                                                                                                                                                                                                                                                                                                                                                                                                                                                                                                                                                                                                                                                                                                                                                                                                                                                                                                                                                                                                                                                                                                    | %SD                  | /GPC+PC | Metabolite               |            |                        |           |                                                  |              |                                   |          |                    |       |            |      |           |               |       |      |       |     |        |     |       |     |        |     |       |     |       |      |       |     |       |      |       |     |        |      |       |     |        |     |       |     |        |     |       |     |       |      |       |      |       |     |         |        |        |     |       |     |       |      |       |        |        |     |       |         |        |     |       |          |        |     |       |        |        |     |       |         |                                                                                                                                                                                                                                                                                                                                                                                                                                                                                                                                                               |            |           |           |        |           |            |            |           |              |             |            |                                                  |   |                 |                                               |                          |
| 18.625                                                                                                                                                                                                                                                                                                                                                                                                                                                                                                                                                                                                                                                                                                                                                                                                                                                                                                                                                                                                                                                                                                                                                                                                                                                                                                                                   | 48%                  | 0.746   | Ala                      |            |                        |           |                                                  |              |                                   |          |                    |       |            |      |           |               |       |      |       |     |        |     |       |     |        |     |       |     |       |      |       |     |       |      |       |     |        |      |       |     |        |     |       |     |        |     |       |     |       |      |       |      |       |     |         |        |        |     |       |     |       |      |       |        |        |     |       |         |        |     |       |          |        |     |       |        |        |     |       |         |                                                                                                                                                                                                                                                                                                                                                                                                                                                                                                                                                               |            |           |           |        |           |            |            |           |              |             |            |                                                  |   |                 |                                               |                          |
| 40.305                                                                                                                                                                                                                                                                                                                                                                                                                                                                                                                                                                                                                                                                                                                                                                                                                                                                                                                                                                                                                                                                                                                                                                                                                                                                                                                                   | 114%                 | 1.615   | Cr                       |            |                        |           |                                                  |              |                                   |          |                    |       |            |      |           |               |       |      |       |     |        |     |       |     |        |     |       |     |       |      |       |     |       |      |       |     |        |      |       |     |        |     |       |     |        |     |       |     |       |      |       |      |       |     |         |        |        |     |       |     |       |      |       |        |        |     |       |         |        |     |       |          |        |     |       |        |        |     |       |         |                                                                                                                                                                                                                                                                                                                                                                                                                                                                                                                                                               |            |           |           |        |           |            |            |           |              |             |            |                                                  |   |                 |                                               |                          |
| 3.153                                                                                                                                                                                                                                                                                                                                                                                                                                                                                                                                                                                                                                                                                                                                                                                                                                                                                                                                                                                                                                                                                                                                                                                                                                                                                                                                    | 999%                 | 0.126   | PCr                      |            |                        |           |                                                  |              |                                   |          |                    |       |            |      |           |               |       |      |       |     |        |     |       |     |        |     |       |     |       |      |       |     |       |      |       |     |        |      |       |     |        |     |       |     |        |     |       |     |       |      |       |      |       |     |         |        |        |     |       |     |       |      |       |        |        |     |       |         |        |     |       |          |        |     |       |        |        |     |       |         |                                                                                                                                                                                                                                                                                                                                                                                                                                                                                                                                                               |            |           |           |        |           |            |            |           |              |             |            |                                                  |   |                 |                                               |                          |
| 0.000                                                                                                                                                                                                                                                                                                                                                                                                                                                                                                                                                                                                                                                                                                                                                                                                                                                                                                                                                                                                                                                                                                                                                                                                                                                                                                                                    | 999%                 | 0.000   | Gln                      |            |                        |           |                                                  |              |                                   |          |                    |       |            |      |           |               |       |      |       |     |        |     |       |     |        |     |       |     |       |      |       |     |       |      |       |     |        |      |       |     |        |     |       |     |        |     |       |     |       |      |       |      |       |     |         |        |        |     |       |     |       |      |       |        |        |     |       |         |        |     |       |          |        |     |       |        |        |     |       |         |                                                                                                                                                                                                                                                                                                                                                                                                                                                                                                                                                               |            |           |           |        |           |            |            |           |              |             |            |                                                  |   |                 |                                               |                          |
| 35.840                                                                                                                                                                                                                                                                                                                                                                                                                                                                                                                                                                                                                                                                                                                                                                                                                                                                                                                                                                                                                                                                                                                                                                                                                                                                                                                                   | 52%                  | 1.436   | Glu                      |            |                        |           |                                                  |              |                                   |          |                    |       |            |      |           |               |       |      |       |     |        |     |       |     |        |     |       |     |       |      |       |     |       |      |       |     |        |      |       |     |        |     |       |     |        |     |       |     |       |      |       |      |       |     |         |        |        |     |       |     |       |      |       |        |        |     |       |         |        |     |       |          |        |     |       |        |        |     |       |         |                                                                                                                                                                                                                                                                                                                                                                                                                                                                                                                                                               |            |           |           |        |           |            |            |           |              |             |            |                                                  |   |                 |                                               |                          |
| 15.868                                                                                                                                                                                                                                                                                                                                                                                                                                                                                                                                                                                                                                                                                                                                                                                                                                                                                                                                                                                                                                                                                                                                                                                                                                                                                                                                   | 83%                  | 0.636   | GPC                      |            |                        |           |                                                  |              |                                   |          |                    |       |            |      |           |               |       |      |       |     |        |     |       |     |        |     |       |     |       |      |       |     |       |      |       |     |        |      |       |     |        |     |       |     |        |     |       |     |       |      |       |      |       |     |         |        |        |     |       |     |       |      |       |        |        |     |       |         |        |     |       |          |        |     |       |        |        |     |       |         |                                                                                                                                                                                                                                                                                                                                                                                                                                                                                                                                                               |            |           |           |        |           |            |            |           |              |             |            |                                                  |   |                 |                                               |                          |
| 9.092                                                                                                                                                                                                                                                                                                                                                                                                                                                                                                                                                                                                                                                                                                                                                                                                                                                                                                                                                                                                                                                                                                                                                                                                                                                                                                                                    | 148%                 | 0.364   | PCh                      |            |                        |           |                                                  |              |                                   |          |                    |       |            |      |           |               |       |      |       |     |        |     |       |     |        |     |       |     |       |      |       |     |       |      |       |     |        |      |       |     |        |     |       |     |        |     |       |     |       |      |       |      |       |     |         |        |        |     |       |     |       |      |       |        |        |     |       |         |        |     |       |          |        |     |       |        |        |     |       |         |                                                                                                                                                                                                                                                                                                                                                                                                                                                                                                                                                               |            |           |           |        |           |            |            |           |              |             |            |                                                  |   |                 |                                               |                          |
| 0.000                                                                                                                                                                                                                                                                                                                                                                                                                                                                                                                                                                                                                                                                                                                                                                                                                                                                                                                                                                                                                                                                                                                                                                                                                                                                                                                                    | 999%                 | 0.000   | GSH                      |            |                        |           |                                                  |              |                                   |          |                    |       |            |      |           |               |       |      |       |     |        |     |       |     |        |     |       |     |       |      |       |     |       |      |       |     |        |      |       |     |        |     |       |     |        |     |       |     |       |      |       |      |       |     |         |        |        |     |       |     |       |      |       |        |        |     |       |         |        |     |       |          |        |     |       |        |        |     |       |         |                                                                                                                                                                                                                                                                                                                                                                                                                                                                                                                                                               |            |           |           |        |           |            |            |           |              |             |            |                                                  |   |                 |                                               |                          |
| 43.175                                                                                                                                                                                                                                                                                                                                                                                                                                                                                                                                                                                                                                                                                                                                                                                                                                                                                                                                                                                                                                                                                                                                                                                                                                                                                                                                   | 180%                 | 1.730   | Ins                      |            |                        |           |                                                  |              |                                   |          |                    |       |            |      |           |               |       |      |       |     |        |     |       |     |        |     |       |     |       |      |       |     |       |      |       |     |        |      |       |     |        |     |       |     |        |     |       |     |       |      |       |      |       |     |         |        |        |     |       |     |       |      |       |        |        |     |       |         |        |     |       |          |        |     |       |        |        |     |       |         |                                                                                                                                                                                                                                                                                                                                                                                                                                                                                                                                                               |            |           |           |        |           |            |            |           |              |             |            |                                                  |   |                 |                                               |                          |
| 62.101                                                                                                                                                                                                                                                                                                                                                                                                                                                                                                                                                                                                                                                                                                                                                                                                                                                                                                                                                                                                                                                                                                                                                                                                                                                                                                                                   | 12%                  | 2.488   | Lac                      |            |                        |           |                                                  |              |                                   |          |                    |       |            |      |           |               |       |      |       |     |        |     |       |     |        |     |       |     |       |      |       |     |       |      |       |     |        |      |       |     |        |     |       |     |        |     |       |     |       |      |       |      |       |     |         |        |        |     |       |     |       |      |       |        |        |     |       |         |        |     |       |          |        |     |       |        |        |     |       |         |                                                                                                                                                                                                                                                                                                                                                                                                                                                                                                                                                               |            |           |           |        |           |            |            |           |              |             |            |                                                  |   |                 |                                               |                          |
| 63.824                                                                                                                                                                                                                                                                                                                                                                                                                                                                                                                                                                                                                                                                                                                                                                                                                                                                                                                                                                                                                                                                                                                                                                                                                                                                                                                                   | 11%                  | 2.557   | NAA                      |            |                        |           |                                                  |              |                                   |          |                    |       |            |      |           |               |       |      |       |     |        |     |       |     |        |     |       |     |       |      |       |     |       |      |       |     |        |      |       |     |        |     |       |     |        |     |       |     |       |      |       |      |       |     |         |        |        |     |       |     |       |      |       |        |        |     |       |         |        |     |       |          |        |     |       |        |        |     |       |         |                                                                                                                                                                                                                                                                                                                                                                                                                                                                                                                                                               |            |           |           |        |           |            |            |           |              |             |            |                                                  |   |                 |                                               |                          |
| 0.000                                                                                                                                                                                                                                                                                                                                                                                                                                                                                                                                                                                                                                                                                                                                                                                                                                                                                                                                                                                                                                                                                                                                                                                                                                                                                                                                    | 999%                 | 0.000   | NAAG                     |            |                        |           |                                                  |              |                                   |          |                    |       |            |      |           |               |       |      |       |     |        |     |       |     |        |     |       |     |       |      |       |     |       |      |       |     |        |      |       |     |        |     |       |     |        |     |       |     |       |      |       |      |       |     |         |        |        |     |       |     |       |      |       |        |        |     |       |         |        |     |       |          |        |     |       |        |        |     |       |         |                                                                                                                                                                                                                                                                                                                                                                                                                                                                                                                                                               |            |           |           |        |           |            |            |           |              |             |            |                                                  |   |                 |                                               |                          |
| 2.347                                                                                                                                                                                                                                                                                                                                                                                                                                                                                                                                                                                                                                                                                                                                                                                                                                                                                                                                                                                                                                                                                                                                                                                                                                                                                                                                    | 70%                  | 9.4E-02 | Scyllo                   |            |                        |           |                                                  |              |                                   |          |                    |       |            |      |           |               |       |      |       |     |        |     |       |     |        |     |       |     |       |      |       |     |       |      |       |     |        |      |       |     |        |     |       |     |        |     |       |     |       |      |       |      |       |     |         |        |        |     |       |     |       |      |       |        |        |     |       |         |        |     |       |          |        |     |       |        |        |     |       |         |                                                                                                                                                                                                                                                                                                                                                                                                                                                                                                                                                               |            |           |           |        |           |            |            |           |              |             |            |                                                  |   |                 |                                               |                          |
| 13.241                                                                                                                                                                                                                                                                                                                                                                                                                                                                                                                                                                                                                                                                                                                                                                                                                                                                                                                                                                                                                                                                                                                                                                                                                                                                                                                                   | 63%                  | 0.530   | Tau                      |            |                        |           |                                                  |              |                                   |          |                    |       |            |      |           |               |       |      |       |     |        |     |       |     |        |     |       |     |       |      |       |     |       |      |       |     |        |      |       |     |        |     |       |     |        |     |       |     |       |      |       |      |       |     |         |        |        |     |       |     |       |      |       |        |        |     |       |         |        |     |       |          |        |     |       |        |        |     |       |         |                                                                                                                                                                                                                                                                                                                                                                                                                                                                                                                                                               |            |           |           |        |           |            |            |           |              |             |            |                                                  |   |                 |                                               |                          |
| 6.600                                                                                                                                                                                                                                                                                                                                                                                                                                                                                                                                                                                                                                                                                                                                                                                                                                                                                                                                                                                                                                                                                                                                                                                                                                                                                                                                    | 119%                 | 0.264   | -CrCH2                   |            |                        |           |                                                  |              |                                   |          |                    |       |            |      |           |               |       |      |       |     |        |     |       |     |        |     |       |     |       |      |       |     |       |      |       |     |        |      |       |     |        |     |       |     |        |     |       |     |       |      |       |      |       |     |         |        |        |     |       |     |       |      |       |        |        |     |       |         |        |     |       |          |        |     |       |        |        |     |       |         |                                                                                                                                                                                                                                                                                                                                                                                                                                                                                                                                                               |            |           |           |        |           |            |            |           |              |             |            |                                                  |   |                 |                                               |                          |
| 24.960                                                                                                                                                                                                                                                                                                                                                                                                                                                                                                                                                                                                                                                                                                                                                                                                                                                                                                                                                                                                                                                                                                                                                                                                                                                                                                                                   | 10%                  | 1.000   | GPC+PCh                  |            |                        |           |                                                  |              |                                   |          |                    |       |            |      |           |               |       |      |       |     |        |     |       |     |        |     |       |     |       |      |       |     |       |      |       |     |        |      |       |     |        |     |       |     |        |     |       |     |       |      |       |      |       |     |         |        |        |     |       |     |       |      |       |        |        |     |       |         |        |     |       |          |        |     |       |        |        |     |       |         |                                                                                                                                                                                                                                                                                                                                                                                                                                                                                                                                                               |            |           |           |        |           |            |            |           |              |             |            |                                                  |   |                 |                                               |                          |
| 63.824                                                                                                                                                                                                                                                                                                                                                                                                                                                                                                                                                                                                                                                                                                                                                                                                                                                                                                                                                                                                                                                                                                                                                                                                                                                                                                                                   | 11%                  | 2.557   | NAA+NAAG                 |            |                        |           |                                                  |              |                                   |          |                    |       |            |      |           |               |       |      |       |     |        |     |       |     |        |     |       |     |       |      |       |     |       |      |       |     |        |      |       |     |        |     |       |     |        |     |       |     |       |      |       |      |       |     |         |        |        |     |       |     |       |      |       |        |        |     |       |         |        |     |       |          |        |     |       |        |        |     |       |         |                                                                                                                                                                                                                                                                                                                                                                                                                                                                                                                                                               |            |           |           |        |           |            |            |           |              |             |            |                                                  |   |                 |                                               |                          |
| 43.458                                                                                                                                                                                                                                                                                                                                                                                                                                                                                                                                                                                                                                                                                                                                                                                                                                                                                                                                                                                                                                                                                                                                                                                                                                                                                                                                   | 16%                  | 1.741   | Cr+PCr                   |            |                        |           |                                                  |              |                                   |          |                    |       |            |      |           |               |       |      |       |     |        |     |       |     |        |     |       |     |       |      |       |     |       |      |       |     |        |      |       |     |        |     |       |     |        |     |       |     |       |      |       |      |       |     |         |        |        |     |       |     |       |      |       |        |        |     |       |         |        |     |       |          |        |     |       |        |        |     |       |         |                                                                                                                                                                                                                                                                                                                                                                                                                                                                                                                                                               |            |           |           |        |           |            |            |           |              |             |            |                                                  |   |                 |                                               |                          |
| 35.840                                                                                                                                                                                                                                                                                                                                                                                                                                                                                                                                                                                                                                                                                                                                                                                                                                                                                                                                                                                                                                                                                                                                                                                                                                                                                                                                   | 52%                  | 1.436   | Glu+Gln                  |            |                        |           |                                                  |              |                                   |          |                    |       |            |      |           |               |       |      |       |     |        |     |       |     |        |     |       |     |       |      |       |     |       |      |       |     |        |      |       |     |        |     |       |     |        |     |       |     |       |      |       |      |       |     |         |        |        |     |       |     |       |      |       |        |        |     |       |         |        |     |       |          |        |     |       |        |        |     |       |         |                                                                                                                                                                                                                                                                                                                                                                                                                                                                                                                                                               |            |           |           |        |           |            |            |           |              |             |            |                                                  |   |                 |                                               |                          |
| irowen= 13                                                                                                                                                                                                                                                                                                                                                                                                                                                                                                                                                                                                                                                                                                                                                                                                                                                                                                                                                                                                                                                                                                                                                                                                                                                                                                                               |                      |         |                          |            |                        |           |                                                  |              |                                   |          |                    |       |            |      |           |               |       |      |       |     |        |     |       |     |        |     |       |     |       |      |       |     |       |      |       |     |        |      |       |     |        |     |       |     |        |     |       |     |       |      |       |      |       |     |         |        |        |     |       |     |       |      |       |        |        |     |       |         |        |     |       |          |        |     |       |        |        |     |       |         |                                                                                                                                                                                                                                                                                                                                                                                                                                                                                                                                                               |            |           |           |        |           |            |            |           |              |             |            |                                                  |   |                 |                                               |                          |
| irowst= 9                                                                                                                                                                                                                                                                                                                                                                                                                                                                                                                                                                                                                                                                                                                                                                                                                                                                                                                                                                                                                                                                                                                                                                                                                                                                                                                                |                      |         |                          |            |                        |           |                                                  |              |                                   |          |                    |       |            |      |           |               |       |      |       |     |        |     |       |     |        |     |       |     |       |      |       |     |       |      |       |     |        |      |       |     |        |     |       |     |        |     |       |     |       |      |       |      |       |     |         |        |        |     |       |     |       |      |       |        |        |     |       |         |        |     |       |          |        |     |       |        |        |     |       |         |                                                                                                                                                                                                                                                                                                                                                                                                                                                                                                                                                               |            |           |           |        |           |            |            |           |              |             |            |                                                  |   |                 |                                               |                          |
| islice= 1                                                                                                                                                                                                                                                                                                                                                                                                                                                                                                                                                                                                                                                                                                                                                                                                                                                                                                                                                                                                                                                                                                                                                                                                                                                                                                                                |                      |         |                          |            |                        |           |                                                  |              |                                   |          |                    |       |            |      |           |               |       |      |       |     |        |     |       |     |        |     |       |     |       |      |       |     |       |      |       |     |        |      |       |     |        |     |       |     |        |     |       |     |       |      |       |      |       |     |         |        |        |     |       |     |       |      |       |        |        |     |       |         |        |     |       |          |        |     |       |        |        |     |       |         |                                                                                                                                                                                                                                                                                                                                                                                                                                                                                                                                                               |            |           |           |        |           |            |            |           |              |             |            |                                                  |   |                 |                                               |                          |
| lps= 8                                                                                                                                                                                                                                                                                                                                                                                                                                                                                                                                                                                                                                                                                                                                                                                                                                                                                                                                                                                                                                                                                                                                                                                                                                                                                                                                   |                      |         |                          |            |                        |           |                                                  |              |                                   |          |                    |       |            |      |           |               |       |      |       |     |        |     |       |     |        |     |       |     |       |      |       |     |       |      |       |     |        |      |       |     |        |     |       |     |        |     |       |     |       |      |       |      |       |     |         |        |        |     |       |     |       |      |       |        |        |     |       |         |        |     |       |          |        |     |       |        |        |     |       |         |                                                                                                                                                                                                                                                                                                                                                                                                                                                                                                                                                               |            |           |           |        |           |            |            |           |              |             |            |                                                  |   |                 |                                               |                          |
| ltable= 7                                                                                                                                                                                                                                                                                                                                                                                                                                                                                                                                                                                                                                                                                                                                                                                                                                                                                                                                                                                                                                                                                                                                                                                                                                                                                                                                |                      |         |                          |            |                        |           |                                                  |              |                                   |          |                    |       |            |      |           |               |       |      |       |     |        |     |       |     |        |     |       |     |       |      |       |     |       |      |       |     |        |      |       |     |        |     |       |     |        |     |       |     |       |      |       |      |       |     |         |        |        |     |       |     |       |      |       |        |        |     |       |         |        |     |       |          |        |     |       |        |        |     |       |         |                                                                                                                                                                                                                                                                                                                                                                                                                                                                                                                                                               |            |           |           |        |           |            |            |           |              |             |            |                                                  |   |                 |                                               |                          |
| ndcols= 11                                                                                                                                                                                                                                                                                                                                                                                                                                                                                                                                                                                                                                                                                                                                                                                                                                                                                                                                                                                                                                                                                                                                                                                                                                                                                                                               |                      |         |                          |            |                        |           |                                                  |              |                                   |          |                    |       |            |      |           |               |       |      |       |     |        |     |       |     |        |     |       |     |       |      |       |     |       |      |       |     |        |      |       |     |        |     |       |     |        |     |       |     |       |      |       |      |       |     |         |        |        |     |       |     |       |      |       |        |        |     |       |         |        |     |       |          |        |     |       |        |        |     |       |         |                                                                                                                                                                                                                                                                                                                                                                                                                                                                                                                                                               |            |           |           |        |           |            |            |           |              |             |            |                                                  |   |                 |                                               |                          |
| ndrows= 14                                                                                                                                                                                                                                                                                                                                                                                                                                                                                                                                                                                                                                                                                                                                                                                                                                                                                                                                                                                                                                                                                                                                                                                                                                                                                                                               |                      |         |                          |            |                        |           |                                                  |              |                                   |          |                    |       |            |      |           |               |       |      |       |     |        |     |       |     |        |     |       |     |       |      |       |     |       |      |       |     |        |      |       |     |        |     |       |     |        |     |       |     |       |      |       |      |       |     |         |        |        |     |       |     |       |      |       |        |        |     |       |         |        |     |       |          |        |     |       |        |        |     |       |         |                                                                                                                                                                                                                                                                                                                                                                                                                                                                                                                                                               |            |           |           |        |           |            |            |           |              |             |            |                                                  |   |                 |                                               |                          |
| ndslic= 1                                                                                                                                                                                                                                                                                                                                                                                                                                                                                                                                                                                                                                                                                                                                                                                                                                                                                                                                                                                                                                                                                                                                                                                                                                                                                                                                |                      |         |                          |            |                        |           |                                                  |              |                                   |          |                    |       |            |      |           |               |       |      |       |     |        |     |       |     |        |     |       |     |       |      |       |     |       |      |       |     |        |      |       |     |        |     |       |     |        |     |       |     |       |      |       |      |       |     |         |        |        |     |       |     |       |      |       |        |        |     |       |         |        |     |       |          |        |     |       |        |        |     |       |         |                                                                                                                                                                                                                                                                                                                                                                                                                                                                                                                                                               |            |           |           |        |           |            |            |           |              |             |            |                                                  |   |                 |                                               |                          |
| nunfil= 1024                                                                                                                                                                                                                                                                                                                                                                                                                                                                                                                                                                                                                                                                                                                                                                                                                                                                                                                                                                                                                                                                                                                                                                                                                                                                                                                             |                      |         |                          |            |                        |           |                                                  |              |                                   |          |                    |       |            |      |           |               |       |      |       |     |        |     |       |     |        |     |       |     |       |      |       |     |       |      |       |     |        |      |       |     |        |     |       |     |        |     |       |     |       |      |       |      |       |     |         |        |        |     |       |     |       |      |       |        |        |     |       |         |        |     |       |          |        |     |       |        |        |     |       |         |                                                                                                                                                                                                                                                                                                                                                                                                                                                                                                                                                               |            |           |           |        |           |            |            |           |              |             |            |                                                  |   |                 |                                               |                          |
| ppmend= 1.0                                                                                                                                                                                                                                                                                                                                                                                                                                                                                                                                                                                                                                                                                                                                                                                                                                                                                                                                                                                                                                                                                                                                                                                                                                                                                                                              |                      |         |                          |            |                        |           |                                                  |              |                                   |          |                    |       |            |      |           |               |       |      |       |     |        |     |       |     |        |     |       |     |       |      |       |     |       |      |       |     |        |      |       |     |        |     |       |     |        |     |       |     |       |      |       |      |       |     |         |        |        |     |       |     |       |      |       |        |        |     |       |         |        |     |       |          |        |     |       |        |        |     |       |         |                                                                                                                                                                                                                                                                                                                                                                                                                                                                                                                                                               |            |           |           |        |           |            |            |           |              |             |            |                                                  |   |                 |                                               |                          |
| ppmst= 4.0                                                                                                                                                                                                                                                                                                                                                                                                                                                                                                                                                                                                                                                                                                                                                                                                                                                                                                                                                                                                                                                                                                                                                                                                                                                                                                                               |                      |         |                          |            |                        |           |                                                  |              |                                   |          |                    |       |            |      |           |               |       |      |       |     |        |     |       |     |        |     |       |     |       |      |       |     |       |      |       |     |        |      |       |     |        |     |       |     |        |     |       |     |       |      |       |      |       |     |         |        |        |     |       |     |       |      |       |        |        |     |       |         |        |     |       |          |        |     |       |        |        |     |       |         |                                                                                                                                                                                                                                                                                                                                                                                                                                                                                                                                                               |            |           |           |        |           |            |            |           |              |             |            |                                                  |   |                 |                                               |                          |
| savdir= '/home/data/Studies/GBM_Spektro/results/                                                                                                                                                                                                                                                                                                                                                                                                                                                                                                                                                                                                                                                                                                                                                                                                                                                                                                                                                                                                                                                                                                                                                                                                                                                                                         |                      |         |                          |            |                        |           |                                                  |              |                                   |          |                    |       |            |      |           |               |       |      |       |     |        |     |       |     |        |     |       |     |       |      |       |     |       |      |       |     |        |      |       |     |        |     |       |     |        |     |       |     |       |      |       |      |       |     |         |        |        |     |       |     |       |      |       |        |        |     |       |         |        |     |       |          |        |     |       |        |        |     |       |         |                                                                                                                                                                                                                                                                                                                                                                                                                                                                                                                                                               |            |           |           |        |           |            |            |           |              |             |            |                                                  |   |                 |                                               |                          |
| ,                                                                                                                                                                                                                                                                                                                                                                                                                                                                                                                                                                                                                                                                                                                                                                                                                                                                                                                                                                                                                                                                                                                                                                                                                                                                                                                                        |                      |         |                          |            |                        |           |                                                  |              |                                   |          |                    |       |            |      |           |               |       |      |       |     |        |     |       |     |        |     |       |     |       |      |       |     |       |      |       |     |        |      |       |     |        |     |       |     |        |     |       |     |       |      |       |      |       |     |         |        |        |     |       |     |       |      |       |        |        |     |       |         |        |     |       |          |        |     |       |        |        |     |       |         |                                                                                                                                                                                                                                                                                                                                                                                                                                                                                                                                                               |            |           |           |        |           |            |            |           |              |             |            |                                                  |   |                 |                                               |                          |
| sptype= 'tumor'                                                                                                                                                                                                                                                                                                                                                                                                                                                                                                                                                                                                                                                                                                                                                                                                                                                                                                                                                                                                                                                                                                                                                                                                                                                                                                                          |                      |         |                          |            |                        |           |                                                  |              |                                   |          |                    |       |            |      |           |               |       |      |       |     |        |     |       |     |        |     |       |     |       |      |       |     |       |      |       |     |        |      |       |     |        |     |       |     |        |     |       |     |       |      |       |      |       |     |         |        |        |     |       |     |       |      |       |        |        |     |       |         |        |     |       |          |        |     |       |        |        |     |       |         |                                                                                                                                                                                                                                                                                                                                                                                                                                                                                                                                                               |            |           |           |        |           |            |            |           |              |             |            |                                                  |   |                 |                                               |                          |
| srcraw= '/home/data/Studies/GBM_Spektro/data/                                                                                                                                                                                                                                                                                                                                                                                                                                                                                                                                                                                                                                                                                                                                                                                                                                                                                                                                                                                                                                                                                                                                                                                                                                                                                            |                      |         |                          |            |                        |           |                                                  |              |                                   |          |                    |       |            |      |           |               |       |      |       |     |        |     |       |     |        |     |       |     |       |      |       |     |       |      |       |     |        |      |       |     |        |     |       |     |        |     |       |     |       |      |       |      |       |     |         |        |        |     |       |     |       |      |       |        |        |     |       |         |        |     |       |          |        |     |       |        |        |     |       |         |                                                                                                                                                                                                                                                                                                                                                                                                                                                                                                                                                               |            |           |           |        |           |            |            |           |              |             |            |                                                  |   |                 |                                               |                          |
| st0288_5_1_raw_act.SDAT'                                                                                                                                                                                                                                                                                                                                                                                                                                                                                                                                                                                                                                                                                                                                                                                                                                                                                                                                                                                                                                                                                                                                                                                                                                                                                                                 |                      |         |                          |            |                        |           |                                                  |              |                                   |          |                    |       |            |      |           |               |       |      |       |     |        |     |       |     |        |     |       |     |       |      |       |     |       |      |       |     |        |      |       |     |        |     |       |     |        |     |       |     |       |      |       |      |       |     |         |        |        |     |       |     |       |      |       |        |        |     |       |         |        |     |       |          |        |     |       |        |        |     |       |         |                                                                                                                                                                                                                                                                                                                                                                                                                                                                                                                                                               |            |           |           |        |           |            |            |           |              |             |            |                                                  |   |                 |                                               |                          |
| <table><tr><td>0.000</td><td>999%</td><td>0.000</td><td>Lip13a</td></tr><tr><td>0.000</td><td>999%</td><td>0.000</td><td>Lip13b</td></tr><tr><td>0.000</td><td>999%</td><td>0.000</td><td>Lip20</td></tr><tr><td>0.000</td><td>999%</td><td>0.000</td><td>Lip13a+Lip13b</td></tr></table>                                                                                                                                                                                                                                                                                                                                                                                                                                                                                                                                                                                                                                                                                                                                                                                                                                                                                                                                                                                                                                                | 0.000                | 999%    | 0.000                    | Lip13a     | 0.000                  | 999%      | 0.000                                            | Lip13b       | 0.000                             | 999%     | 0.000              | Lip20 | 0.000      | 999% | 0.000     | Lip13a+Lip13b |       |      |       |     |        |     |       |     |        |     |       |     |       |      |       |     |       |      |       |     |        |      |       |     |        |     |       |     |        |     |       |     |       |      |       |      |       |     |         |        |        |     |       |     |       |      |       |        |        |     |       |         |        |     |       |          |        |     |       |        |        |     |       |         |                                                                                                                                                                                                                                                                                                                                                                                                                                                                                                                                                               |            |           |           |        |           |            |            |           |              |             |            |                                                  |   |                 |                                               |                          |
| 0.000                                                                                                                                                                                                                                                                                                                                                                                                                                                                                                                                                                                                                                                                                                                                                                                                                                                                                                                                                                                                                                                                                                                                                                                                                                                                                                                                    | 999%                 | 0.000   | Lip13a                   |            |                        |           |                                                  |              |                                   |          |                    |       |            |      |           |               |       |      |       |     |        |     |       |     |        |     |       |     |       |      |       |     |       |      |       |     |        |      |       |     |        |     |       |     |        |     |       |     |       |      |       |      |       |     |         |        |        |     |       |     |       |      |       |        |        |     |       |         |        |     |       |          |        |     |       |        |        |     |       |         |                                                                                                                                                                                                                                                                                                                                                                                                                                                                                                                                                               |            |           |           |        |           |            |            |           |              |             |            |                                                  |   |                 |                                               |                          |
| 0.000                                                                                                                                                                                                                                                                                                                                                                                                                                                                                                                                                                                                                                                                                                                                                                                                                                                                                                                                                                                                                                                                                                                                                                                                                                                                                                                                    | 999%                 | 0.000   | Lip13b                   |            |                        |           |                                                  |              |                                   |          |                    |       |            |      |           |               |       |      |       |     |        |     |       |     |        |     |       |     |       |      |       |     |       |      |       |     |        |      |       |     |        |     |       |     |        |     |       |     |       |      |       |      |       |     |         |        |        |     |       |     |       |      |       |        |        |     |       |         |        |     |       |          |        |     |       |        |        |     |       |         |                                                                                                                                                                                                                                                                                                                                                                                                                                                                                                                                                               |            |           |           |        |           |            |            |           |              |             |            |                                                  |   |                 |                                               |                          |
| 0.000                                                                                                                                                                                                                                                                                                                                                                                                                                                                                                                                                                                                                                                                                                                                                                                                                                                                                                                                                                                                                                                                                                                                                                                                                                                                                                                                    | 999%                 | 0.000   | Lip20                    |            |                        |           |                                                  |              |                                   |          |                    |       |            |      |           |               |       |      |       |     |        |     |       |     |        |     |       |     |       |      |       |     |       |      |       |     |        |      |       |     |        |     |       |     |        |     |       |     |       |      |       |      |       |     |         |        |        |     |       |     |       |      |       |        |        |     |       |         |        |     |       |          |        |     |       |        |        |     |       |         |                                                                                                                                                                                                                                                                                                                                                                                                                                                                                                                                                               |            |           |           |        |           |            |            |           |              |             |            |                                                  |   |                 |                                               |                          |
| 0.000                                                                                                                                                                                                                                                                                                                                                                                                                                                                                                                                                                                                                                                                                                                                                                                                                                                                                                                                                                                                                                                                                                                                                                                                                                                                                                                                    | 999%                 | 0.000   | Lip13a+Lip13b            |            |                        |           |                                                  |              |                                   |          |                    |       |            |      |           |               |       |      |       |     |        |     |       |     |        |     |       |     |       |      |       |     |       |      |       |     |        |      |       |     |        |     |       |     |        |     |       |     |       |      |       |      |       |     |         |        |        |     |       |     |       |      |       |        |        |     |       |         |        |     |       |          |        |     |       |        |        |     |       |         |                                                                                                                                                                                                                                                                                                                                                                                                                                                                                                                                                               |            |           |           |        |           |            |            |           |              |             |            |                                                  |   |                 |                                               |                          |
| <table><tr><th colspan="2">DIAGNOSTICS</th></tr><tr><td>1 info</td><td>STARTV 24</td></tr><tr><td>7 info's</td><td>RFALSI 11</td></tr><tr><td>3 info's</td><td>RFALSI 4</td></tr><tr><td>1 info</td><td>TWOREG 8</td></tr></table>                                                                                                                                                                                                                                                                                                                                                                                                                                                                                                                                                                                                                                                                                                                                                                                                                                                                                                                                                                                                                                                                                                       | DIAGNOSTICS          |         | 1 info                   | STARTV 24  | 7 info's               | RFALSI 11 | 3 info's                                         | RFALSI 4     | 1 info                            | TWOREG 8 |                    |       |            |      |           |               |       |      |       |     |        |     |       |     |        |     |       |     |       |      |       |     |       |      |       |     |        |      |       |     |        |     |       |     |        |     |       |     |       |      |       |      |       |     |         |        |        |     |       |     |       |      |       |        |        |     |       |         |        |     |       |          |        |     |       |        |        |     |       |         |                                                                                                                                                                                                                                                                                                                                                                                                                                                                                                                                                               |            |           |           |        |           |            |            |           |              |             |            |                                                  |   |                 |                                               |                          |
| DIAGNOSTICS                                                                                                                                                                                                                                                                                                                                                                                                                                                                                                                                                                                                                                                                                                                                                                                                                                                                                                                                                                                                                                                                                                                                                                                                                                                                                                                              |                      |         |                          |            |                        |           |                                                  |              |                                   |          |                    |       |            |      |           |               |       |      |       |     |        |     |       |     |        |     |       |     |       |      |       |     |       |      |       |     |        |      |       |     |        |     |       |     |        |     |       |     |       |      |       |      |       |     |         |        |        |     |       |     |       |      |       |        |        |     |       |         |        |     |       |          |        |     |       |        |        |     |       |         |                                                                                                                                                                                                                                                                                                                                                                                                                                                                                                                                                               |            |           |           |        |           |            |            |           |              |             |            |                                                  |   |                 |                                               |                          |
| 1 info                                                                                                                                                                                                                                                                                                                                                                                                                                                                                                                                                                                                                                                                                                                                                                                                                                                                                                                                                                                                                                                                                                                                                                                                                                                                                                                                   | STARTV 24            |         |                          |            |                        |           |                                                  |              |                                   |          |                    |       |            |      |           |               |       |      |       |     |        |     |       |     |        |     |       |     |       |      |       |     |       |      |       |     |        |      |       |     |        |     |       |     |        |     |       |     |       |      |       |      |       |     |         |        |        |     |       |     |       |      |       |        |        |     |       |         |        |     |       |          |        |     |       |        |        |     |       |         |                                                                                                                                                                                                                                                                                                                                                                                                                                                                                                                                                               |            |           |           |        |           |            |            |           |              |             |            |                                                  |   |                 |                                               |                          |
| 7 info's                                                                                                                                                                                                                                                                                                                                                                                                                                                                                                                                                                                                                                                                                                                                                                                                                                                                                                                                                                                                                                                                                                                                                                                                                                                                                                                                 | RFALSI 11            |         |                          |            |                        |           |                                                  |              |                                   |          |                    |       |            |      |           |               |       |      |       |     |        |     |       |     |        |     |       |     |       |      |       |     |       |      |       |     |        |      |       |     |        |     |       |     |        |     |       |     |       |      |       |      |       |     |         |        |        |     |       |     |       |      |       |        |        |     |       |         |        |     |       |          |        |     |       |        |        |     |       |         |                                                                                                                                                                                                                                                                                                                                                                                                                                                                                                                                                               |            |           |           |        |           |            |            |           |              |             |            |                                                  |   |                 |                                               |                          |
| 3 info's                                                                                                                                                                                                                                                                                                                                                                                                                                                                                                                                                                                                                                                                                                                                                                                                                                                                                                                                                                                                                                                                                                                                                                                                                                                                                                                                 | RFALSI 4             |         |                          |            |                        |           |                                                  |              |                                   |          |                    |       |            |      |           |               |       |      |       |     |        |     |       |     |        |     |       |     |       |      |       |     |       |      |       |     |        |      |       |     |        |     |       |     |        |     |       |     |       |      |       |      |       |     |         |        |        |     |       |     |       |      |       |        |        |     |       |         |        |     |       |          |        |     |       |        |        |     |       |         |                                                                                                                                                                                                                                                                                                                                                                                                                                                                                                                                                               |            |           |           |        |           |            |            |           |              |             |            |                                                  |   |                 |                                               |                          |
| 1 info                                                                                                                                                                                                                                                                                                                                                                                                                                                                                                                                                                                                                                                                                                                                                                                                                                                                                                                                                                                                                                                                                                                                                                                                                                                                                                                                   | TWOREG 8             |         |                          |            |                        |           |                                                  |              |                                   |          |                    |       |            |      |           |               |       |      |       |     |        |     |       |     |        |     |       |     |       |      |       |     |       |      |       |     |        |      |       |     |        |     |       |     |        |     |       |     |       |      |       |      |       |     |         |        |        |     |       |     |       |      |       |        |        |     |       |         |        |     |       |          |        |     |       |        |        |     |       |         |                                                                                                                                                                                                                                                                                                                                                                                                                                                                                                                                                               |            |           |           |        |           |            |            |           |              |             |            |                                                  |   |                 |                                               |                          |
| <table><tr><th colspan="2">MISCELLANEOUS OUTPUT</th></tr><tr><td colspan="2">FWHM = 0.122 ppm S/N = 2</td></tr><tr><td colspan="2">Data shift = 0.046 ppm</td></tr><tr><td>Ph: 12 deg</td><td>-7.0 deg/ppm</td></tr></table>                                                                                                                                                                                                                                                                                                                                                                                                                                                                                                                                                                                                                                                                                                                                                                                                                                                                                                                                                                                                                                                                                                             | MISCELLANEOUS OUTPUT |         | FWHM = 0.122 ppm S/N = 2 |            | Data shift = 0.046 ppm |           | Ph: 12 deg                                       | -7.0 deg/ppm |                                   |          |                    |       |            |      |           |               |       |      |       |     |        |     |       |     |        |     |       |     |       |      |       |     |       |      |       |     |        |      |       |     |        |     |       |     |        |     |       |     |       |      |       |      |       |     |         |        |        |     |       |     |       |      |       |        |        |     |       |         |        |     |       |          |        |     |       |        |        |     |       |         |                                                                                                                                                                                                                                                                                                                                                                                                                                                                                                                                                               |            |           |           |        |           |            |            |           |              |             |            |                                                  |   |                 |                                               |                          |
| MISCELLANEOUS OUTPUT                                                                                                                                                                                                                                                                                                                                                                                                                                                                                                                                                                                                                                                                                                                                                                                                                                                                                                                                                                                                                                                                                                                                                                                                                                                                                                                     |                      |         |                          |            |                        |           |                                                  |              |                                   |          |                    |       |            |      |           |               |       |      |       |     |        |     |       |     |        |     |       |     |       |      |       |     |       |      |       |     |        |      |       |     |        |     |       |     |        |     |       |     |       |      |       |      |       |     |         |        |        |     |       |     |       |      |       |        |        |     |       |         |        |     |       |          |        |     |       |        |        |     |       |         |                                                                                                                                                                                                                                                                                                                                                                                                                                                                                                                                                               |            |           |           |        |           |            |            |           |              |             |            |                                                  |   |                 |                                               |                          |
| FWHM = 0.122 ppm S/N = 2                                                                                                                                                                                                                                                                                                                                                                                                                                                                                                                                                                                                                                                                                                                                                                                                                                                                                                                                                                                                                                                                                                                                                                                                                                                                                                                 |                      |         |                          |            |                        |           |                                                  |              |                                   |          |                    |       |            |      |           |               |       |      |       |     |        |     |       |     |        |     |       |     |       |      |       |     |       |      |       |     |        |      |       |     |        |     |       |     |        |     |       |     |       |      |       |      |       |     |         |        |        |     |       |     |       |      |       |        |        |     |       |         |        |     |       |          |        |     |       |        |        |     |       |         |                                                                                                                                                                                                                                                                                                                                                                                                                                                                                                                                                               |            |           |           |        |           |            |            |           |              |             |            |                                                  |   |                 |                                               |                          |
| Data shift = 0.046 ppm                                                                                                                                                                                                                                                                                                                                                                                                                                                                                                                                                                                                                                                                                                                                                                                                                                                                                                                                                                                                                                                                                                                                                                                                                                                                                                                   |                      |         |                          |            |                        |           |                                                  |              |                                   |          |                    |       |            |      |           |               |       |      |       |     |        |     |       |     |        |     |       |     |       |      |       |     |       |      |       |     |        |      |       |     |        |     |       |     |        |     |       |     |       |      |       |      |       |     |         |        |        |     |       |     |       |      |       |        |        |     |       |         |        |     |       |          |        |     |       |        |        |     |       |         |                                                                                                                                                                                                                                                                                                                                                                                                                                                                                                                                                               |            |           |           |        |           |            |            |           |              |             |            |                                                  |   |                 |                                               |                          |
| Ph: 12 deg                                                                                                                                                                                                                                                                                                                                                                                                                                                                                                                                                                                                                                                                                                                                                                                                                                                                                                                                                                                                                                                                                                                                                                                                                                                                                                                               | -7.0 deg/ppm         |         |                          |            |                        |           |                                                  |              |                                   |          |                    |       |            |      |           |               |       |      |       |     |        |     |       |     |        |     |       |     |       |      |       |     |       |      |       |     |        |      |       |     |        |     |       |     |        |     |       |     |       |      |       |      |       |     |         |        |        |     |       |     |       |      |       |        |        |     |       |         |        |     |       |          |        |     |       |        |        |     |       |         |                                                                                                                                                                                                                                                                                                                                                                                                                                                                                                                                                               |            |           |           |        |           |            |            |           |              |             |            |                                                  |   |                 |                                               |                          |
| <table><tr><th colspan="2">INPUT CHANGES</th></tr><tr><td colspan="2">deltat= 5.000e-04</td></tr><tr><td colspan="2">echot= 288.00</td></tr><tr><td colspan="2">filbas= '/home/stu11733/.lcmmodel/basis-sets/gam</td></tr><tr><td colspan="2">ma_press_te288_128mhz_662d.basis'</td></tr><tr><td colspan="2">hzpppm= 1.2776e+02</td></tr><tr><td colspan="2">icolen= 10</td></tr><tr><td colspan="2">icolst= 5</td></tr></table>                                                                                                                                                                                                                                                                                                                                                                                                                                                                                                                                                                                                                                                                                                                                                                                                                                                                                                         | INPUT CHANGES        |         | deltat= 5.000e-04        |            | echot= 288.00          |           | filbas= '/home/stu11733/.lcmmodel/basis-sets/gam |              | ma_press_te288_128mhz_662d.basis' |          | hzpppm= 1.2776e+02 |       | icolen= 10 |      | icolst= 5 |               |       |      |       |     |        |     |       |     |        |     |       |     |       |      |       |     |       |      |       |     |        |      |       |     |        |     |       |     |        |     |       |     |       |      |       |      |       |     |         |        |        |     |       |     |       |      |       |        |        |     |       |         |        |     |       |          |        |     |       |        |        |     |       |         |                                                                                                                                                                                                                                                                                                                                                                                                                                                                                                                                                               |            |           |           |        |           |            |            |           |              |             |            |                                                  |   |                 |                                               |                          |
| INPUT CHANGES                                                                                                                                                                                                                                                                                                                                                                                                                                                                                                                                                                                                                                                                                                                                                                                                                                                                                                                                                                                                                                                                                                                                                                                                                                                                                                                            |                      |         |                          |            |                        |           |                                                  |              |                                   |          |                    |       |            |      |           |               |       |      |       |     |        |     |       |     |        |     |       |     |       |      |       |     |       |      |       |     |        |      |       |     |        |     |       |     |        |     |       |     |       |      |       |      |       |     |         |        |        |     |       |     |       |      |       |        |        |     |       |         |        |     |       |          |        |     |       |        |        |     |       |         |                                                                                                                                                                                                                                                                                                                                                                                                                                                                                                                                                               |            |           |           |        |           |            |            |           |              |             |            |                                                  |   |                 |                                               |                          |
| deltat= 5.000e-04                                                                                                                                                                                                                                                                                                                                                                                                                                                                                                                                                                                                                                                                                                                                                                                                                                                                                                                                                                                                                                                                                                                                                                                                                                                                                                                        |                      |         |                          |            |                        |           |                                                  |              |                                   |          |                    |       |            |      |           |               |       |      |       |     |        |     |       |     |        |     |       |     |       |      |       |     |       |      |       |     |        |      |       |     |        |     |       |     |        |     |       |     |       |      |       |      |       |     |         |        |        |     |       |     |       |      |       |        |        |     |       |         |        |     |       |          |        |     |       |        |        |     |       |         |                                                                                                                                                                                                                                                                                                                                                                                                                                                                                                                                                               |            |           |           |        |           |            |            |           |              |             |            |                                                  |   |                 |                                               |                          |
| echot= 288.00                                                                                                                                                                                                                                                                                                                                                                                                                                                                                                                                                                                                                                                                                                                                                                                                                                                                                                                                                                                                                                                                                                                                                                                                                                                                                                                            |                      |         |                          |            |                        |           |                                                  |              |                                   |          |                    |       |            |      |           |               |       |      |       |     |        |     |       |     |        |     |       |     |       |      |       |     |       |      |       |     |        |      |       |     |        |     |       |     |        |     |       |     |       |      |       |      |       |     |         |        |        |     |       |     |       |      |       |        |        |     |       |         |        |     |       |          |        |     |       |        |        |     |       |         |                                                                                                                                                                                                                                                                                                                                                                                                                                                                                                                                                               |            |           |           |        |           |            |            |           |              |             |            |                                                  |   |                 |                                               |                          |
| filbas= '/home/stu11733/.lcmmodel/basis-sets/gam                                                                                                                                                                                                                                                                                                                                                                                                                                                                                                                                                                                                                                                                                                                                                                                                                                                                                                                                                                                                                                                                                                                                                                                                                                                                                         |                      |         |                          |            |                        |           |                                                  |              |                                   |          |                    |       |            |      |           |               |       |      |       |     |        |     |       |     |        |     |       |     |       |      |       |     |       |      |       |     |        |      |       |     |        |     |       |     |        |     |       |     |       |      |       |      |       |     |         |        |        |     |       |     |       |      |       |        |        |     |       |         |        |     |       |          |        |     |       |        |        |     |       |         |                                                                                                                                                                                                                                                                                                                                                                                                                                                                                                                                                               |            |           |           |        |           |            |            |           |              |             |            |                                                  |   |                 |                                               |                          |
| ma_press_te288_128mhz_662d.basis'                                                                                                                                                                                                                                                                                                                                                                                                                                                                                                                                                                                                                                                                                                                                                                                                                                                                                                                                                                                                                                                                                                                                                                                                                                                                                                        |                      |         |                          |            |                        |           |                                                  |              |                                   |          |                    |       |            |      |           |               |       |      |       |     |        |     |       |     |        |     |       |     |       |      |       |     |       |      |       |     |        |      |       |     |        |     |       |     |        |     |       |     |       |      |       |      |       |     |         |        |        |     |       |     |       |      |       |        |        |     |       |         |        |     |       |          |        |     |       |        |        |     |       |         |                                                                                                                                                                                                                                                                                                                                                                                                                                                                                                                                                               |            |           |           |        |           |            |            |           |              |             |            |                                                  |   |                 |                                               |                          |
| hzpppm= 1.2776e+02                                                                                                                                                                                                                                                                                                                                                                                                                                                                                                                                                                                                                                                                                                                                                                                                                                                                                                                                                                                                                                                                                                                                                                                                                                                                                                                       |                      |         |                          |            |                        |           |                                                  |              |                                   |          |                    |       |            |      |           |               |       |      |       |     |        |     |       |     |        |     |       |     |       |      |       |     |       |      |       |     |        |      |       |     |        |     |       |     |        |     |       |     |       |      |       |      |       |     |         |        |        |     |       |     |       |      |       |        |        |     |       |         |        |     |       |          |        |     |       |        |        |     |       |         |                                                                                                                                                                                                                                                                                                                                                                                                                                                                                                                                                               |            |           |           |        |           |            |            |           |              |             |            |                                                  |   |                 |                                               |                          |
| icolen= 10                                                                                                                                                                                                                                                                                                                                                                                                                                                                                                                                                                                                                                                                                                                                                                                                                                                                                                                                                                                                                                                                                                                                                                                                                                                                                                                               |                      |         |                          |            |                        |           |                                                  |              |                                   |          |                    |       |            |      |           |               |       |      |       |     |        |     |       |     |        |     |       |     |       |      |       |     |       |      |       |     |        |      |       |     |        |     |       |     |        |     |       |     |       |      |       |      |       |     |         |        |        |     |       |     |       |      |       |        |        |     |       |         |        |     |       |          |        |     |       |        |        |     |       |         |                                                                                                                                                                                                                                                                                                                                                                                                                                                                                                                                                               |            |           |           |        |           |            |            |           |              |             |            |                                                  |   |                 |                                               |                          |
| icolst= 5                                                                                                                                                                                                                                                                                                                                                                                                                                                                                                                                                                                                                                                                                                                                                                                                                                                                                                                                                                                                                                                                                                                                                                                                                                                                                                                                |                      |         |                          |            |                        |           |                                                  |              |                                   |          |                    |       |            |      |           |               |       |      |       |     |        |     |       |     |        |     |       |     |       |      |       |     |       |      |       |     |        |      |       |     |        |     |       |     |        |     |       |     |       |      |       |      |       |     |         |        |        |     |       |     |       |      |       |        |        |     |       |         |        |     |       |          |        |     |       |        |        |     |       |         |                                                                                                                                                                                                                                                                                                                                                                                                                                                                                                                                                               |            |           |           |        |           |            |            |           |              |             |            |                                                  |   |                 |                                               |                          |



P30 - tumor  
voxel 11;4

Row#11 Col#4 MR Spektroskopie (2019.08.27 10:25:40) Subject 04 8.00e-01 mL, TE/TR/NS=288/1500/2 (s2DSI\_TE288 TR1500)

Data of: Sektion Biomedizinische Bildgebung, Christian-Albrechts-Universitaet zu Kiel

LCModel (Version 6.3-1J) Copyright: S.W. Provencher.

Ref.: Magn. Reson. Med. 30:672-679 (1993).

28-November-2019 17:11

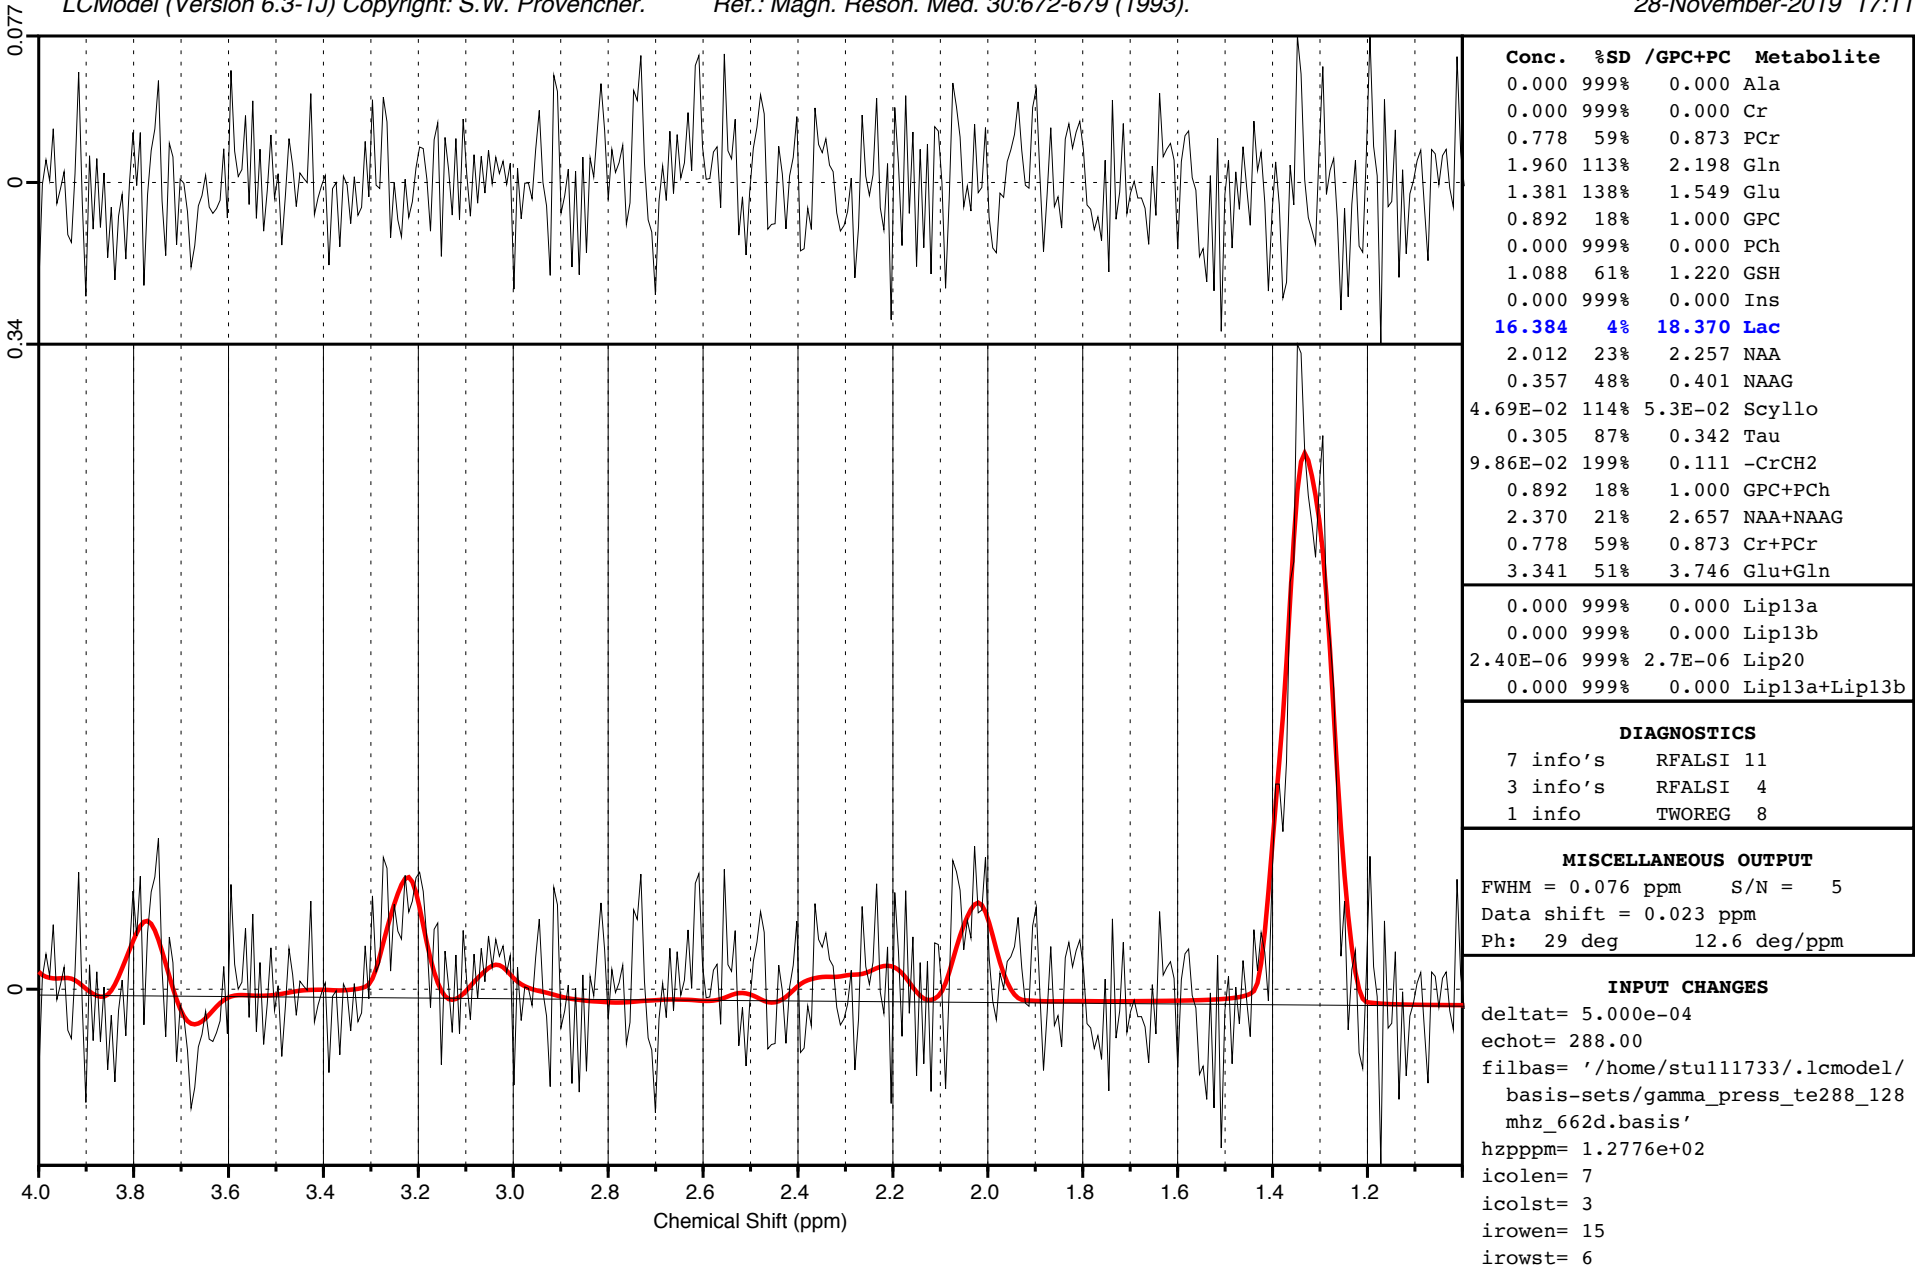

## P30 - tumor voxel 11;4

Row#11 Col#4 MR Spektroskopie (2019.08.27 10:25:40) Subject 04 8.00e-01 mL, TE/TR/NS=288/1500/2 (s2DSI\_TE288 TR1500)

Data of: Sektion Biomedizinische Bildgebung, Christian-Albrechts-Universitaet zu Kiel

LCModel (Version 6.3-1J) Copyright: S.W. Provencher.

*Ref.: Magn. Reson. Med. 30:672-679 (1993).*

28-November-2019 17:11

| <table><tr><th>Conc.</th><th>%SD</th><th>/GPC+PC</th><th>Metabolite</th></tr><tr><td>0.000</td><td>999%</td><td>0.000</td><td>Ala</td></tr><tr><td>0.000</td><td>999%</td><td>0.000</td><td>Cr</td></tr><tr><td>0.778</td><td>59%</td><td>0.873</td><td>PCr</td></tr><tr><td>1.960</td><td>113%</td><td>2.198</td><td>Gln</td></tr><tr><td>1.381</td><td>138%</td><td>1.549</td><td>Glu</td></tr><tr><td>0.892</td><td>18%</td><td>1.000</td><td>GPC</td></tr><tr><td>0.000</td><td>999%</td><td>0.000</td><td>PCh</td></tr><tr><td>1.088</td><td>61%</td><td>1.220</td><td>GSH</td></tr><tr><td>0.000</td><td>999%</td><td>0.000</td><td>Ins</td></tr><tr><td>16.384</td><td>4%</td><td>18.370</td><td>Lac</td></tr><tr><td>2.012</td><td>23%</td><td>2.257</td><td>NAA</td></tr><tr><td>0.357</td><td>48%</td><td>0.401</td><td>NAAG</td></tr><tr><td>4.69E-02</td><td>114%</td><td>5.3E-02</td><td>Scyllo</td></tr><tr><td>0.305</td><td>87%</td><td>0.342</td><td>Tau</td></tr><tr><td>9.86E-02</td><td>199%</td><td>0.111</td><td>-CrCH2</td></tr><tr><td>0.892</td><td>18%</td><td>1.000</td><td>GPC+PCh</td></tr><tr><td>2.370</td><td>21%</td><td>2.657</td><td>NAA+NAAG</td></tr><tr><td>0.778</td><td>59%</td><td>0.873</td><td>Cr+PCr</td></tr><tr><td>3.341</td><td>51%</td><td>3.746</td><td>Glu+Gln</td></tr><tr><td>0.000</td><td>999%</td><td>0.000</td><td>Lip13a</td></tr><tr><td>0.000</td><td>999%</td><td>0.000</td><td>Lip13b</td></tr><tr><td>2.40E-06</td><td>999%</td><td>2.7E-06</td><td>Lip20</td></tr><tr><td>0.000</td><td>999%</td><td>0.000</td><td>Lip13a+Lip13b</td></tr><tr><td colspan="4">DIAGNOSTICS</td></tr><tr><td>7</td><td>info's</td><td>RFALSI</td><td>11</td></tr><tr><td>3</td><td>info's</td><td>RFALSI</td><td>4</td></tr><tr><td>1</td><td>info</td><td>TWOREG</td><td>8</td></tr><tr><td colspan="4">MISCELLANEOUS OUTPUT</td></tr><tr><td colspan="4">FWHM = 0.076 ppm      S/N = 5</td></tr><tr><td colspan="4">Data shift = 0.023 ppm</td></tr><tr><td colspan="4">Ph: 29 deg              12.6 deg/ppm</td></tr><tr><td colspan="4">INPUT CHANGES</td></tr><tr><td colspan="4">deltat= 5.000e-04</td></tr><tr><td colspan="4">echot= 288.00</td></tr><tr><td colspan="4">filbas= '/home/stu11733/.lcmmodel/basis-sets/gam</td></tr><tr><td colspan="4">ma_press_te288_128mhz_662d.basis'</td></tr><tr><td colspan="4">hzpppm= 1.2776e+02</td></tr><tr><td colspan="4">icolen= 7</td></tr><tr><td colspan="4">icolst= 3</td></tr><tr><td colspan="4">irowen= 15</td></tr></table> | Conc.  | %SD     | /GPC+PC       | Metabolite | 0.000 | 999% | 0.000 | Ala | 0.000 | 999% | 0.000 | Cr | 0.778 | 59% | 0.873 | PCr | 1.960 | 113% | 2.198 | Gln | 1.381 | 138% | 1.549 | Glu | 0.892 | 18% | 1.000 | GPC | 0.000 | 999% | 0.000 | PCh | 1.088 | 61% | 1.220 | GSH | 0.000 | 999% | 0.000 | Ins | 16.384 | 4% | 18.370 | Lac | 2.012 | 23% | 2.257 | NAA | 0.357 | 48% | 0.401 | NAAG | 4.69E-02 | 114% | 5.3E-02 | Scyllo | 0.305 | 87% | 0.342 | Tau | 9.86E-02 | 199% | 0.111 | -CrCH2 | 0.892 | 18% | 1.000 | GPC+PCh | 2.370 | 21% | 2.657 | NAA+NAAG | 0.778 | 59% | 0.873 | Cr+PCr | 3.341 | 51% | 3.746 | Glu+Gln | 0.000 | 999% | 0.000 | Lip13a | 0.000 | 999% | 0.000 | Lip13b | 2.40E-06 | 999% | 2.7E-06 | Lip20 | 0.000 | 999% | 0.000 | Lip13a+Lip13b | DIAGNOSTICS |  |  |  | 7 | info's | RFALSI | 11 | 3 | info's | RFALSI | 4 | 1 | info | TWOREG | 8 | MISCELLANEOUS OUTPUT |  |  |  | FWHM = 0.076 ppm      S/N = 5 |  |  |  | Data shift = 0.023 ppm |  |  |  | Ph: 29 deg              12.6 deg/ppm |  |  |  | INPUT CHANGES |  |  |  | deltat= 5.000e-04 |  |  |  | echot= 288.00 |  |  |  | filbas= '/home/stu11733/.lcmmodel/basis-sets/gam |  |  |  | ma_press_te288_128mhz_662d.basis' |  |  |  | hzpppm= 1.2776e+02 |  |  |  | icolen= 7 |  |  |  | icolst= 3 |  |  |  | irowen= 15 |  |  |  | <table><tr><td>irowst= 6</td></tr><tr><td>islice= 1</td></tr><tr><td>lps= 8</td></tr><tr><td>ltable= 7</td></tr><tr><td>ndcols= 16</td></tr><tr><td>ndrows= 20</td></tr><tr><td>ndslic= 1</td></tr><tr><td>nunfil= 1024</td></tr><tr><td>ppmend= 1.0</td></tr><tr><td>ppmst= 4.0</td></tr><tr><td>savdir= '/home/stu11733/.lcmmodel/saved/MR_Spekt</td></tr><tr><td>roskopie/s04/2019.08.27_10:25:40      '/'</td></tr><tr><td>sptype= 'tumor'</td></tr><tr><td>srcraw= '/home/data/Studies/GBM_Spektro/data/s04</td></tr><tr><td>/DBIEX_5_1_raw_act.SDAT'</td></tr></table> | irowst= 6 | islice= 1 | lps= 8 | ltable= 7 | ndcols= 16 | ndrows= 20 | ndslic= 1 | nunfil= 1024 | ppmend= 1.0 | ppmst= 4.0 | savdir= '/home/stu11733/.lcmmodel/saved/MR_Spekt | roskopie/s04/2019.08.27_10:25:40      '/' | sptype= 'tumor' | srcraw= '/home/data/Studies/GBM_Spektro/data/s04 | /DBIEX_5_1_raw_act.SDAT' |
|----------------------------------------------------------------------------------------------------------------------------------------------------------------------------------------------------------------------------------------------------------------------------------------------------------------------------------------------------------------------------------------------------------------------------------------------------------------------------------------------------------------------------------------------------------------------------------------------------------------------------------------------------------------------------------------------------------------------------------------------------------------------------------------------------------------------------------------------------------------------------------------------------------------------------------------------------------------------------------------------------------------------------------------------------------------------------------------------------------------------------------------------------------------------------------------------------------------------------------------------------------------------------------------------------------------------------------------------------------------------------------------------------------------------------------------------------------------------------------------------------------------------------------------------------------------------------------------------------------------------------------------------------------------------------------------------------------------------------------------------------------------------------------------------------------------------------------------------------------------------------------------------------------------------------------------------------------------------------------------------------------------------------------------------------------------------------------------------------------------------------------------------------------------------------------------------------------------------------------------------------------------------------------------------------------------------------------------------------------------------------------------------------------------------------------------------------------------------------------------------------------------------------------------|--------|---------|---------------|------------|-------|------|-------|-----|-------|------|-------|----|-------|-----|-------|-----|-------|------|-------|-----|-------|------|-------|-----|-------|-----|-------|-----|-------|------|-------|-----|-------|-----|-------|-----|-------|------|-------|-----|--------|----|--------|-----|-------|-----|-------|-----|-------|-----|-------|------|----------|------|---------|--------|-------|-----|-------|-----|----------|------|-------|--------|-------|-----|-------|---------|-------|-----|-------|----------|-------|-----|-------|--------|-------|-----|-------|---------|-------|------|-------|--------|-------|------|-------|--------|----------|------|---------|-------|-------|------|-------|---------------|-------------|--|--|--|---|--------|--------|----|---|--------|--------|---|---|------|--------|---|----------------------|--|--|--|-------------------------------|--|--|--|------------------------|--|--|--|--------------------------------------|--|--|--|---------------|--|--|--|-------------------|--|--|--|---------------|--|--|--|--------------------------------------------------|--|--|--|-----------------------------------|--|--|--|--------------------|--|--|--|-----------|--|--|--|-----------|--|--|--|------------|--|--|--|------------------------------------------------------------------------------------------------------------------------------------------------------------------------------------------------------------------------------------------------------------------------------------------------------------------------------------------------------------------------------------------------------------------------------------------------------------------------------------------------------------------------------------------------------------------------------|-----------|-----------|--------|-----------|------------|------------|-----------|--------------|-------------|------------|--------------------------------------------------|-------------------------------------------|-----------------|--------------------------------------------------|--------------------------|
| Conc.                                                                                                                                                                                                                                                                                                                                                                                                                                                                                                                                                                                                                                                                                                                                                                                                                                                                                                                                                                                                                                                                                                                                                                                                                                                                                                                                                                                                                                                                                                                                                                                                                                                                                                                                                                                                                                                                                                                                                                                                                                                                                                                                                                                                                                                                                                                                                                                                                                                                                                                                  | %SD    | /GPC+PC | Metabolite    |            |       |      |       |     |       |      |       |    |       |     |       |     |       |      |       |     |       |      |       |     |       |     |       |     |       |      |       |     |       |     |       |     |       |      |       |     |        |    |        |     |       |     |       |     |       |     |       |      |          |      |         |        |       |     |       |     |          |      |       |        |       |     |       |         |       |     |       |          |       |     |       |        |       |     |       |         |       |      |       |        |       |      |       |        |          |      |         |       |       |      |       |               |             |  |  |  |   |        |        |    |   |        |        |   |   |      |        |   |                      |  |  |  |                               |  |  |  |                        |  |  |  |                                      |  |  |  |               |  |  |  |                   |  |  |  |               |  |  |  |                                                  |  |  |  |                                   |  |  |  |                    |  |  |  |           |  |  |  |           |  |  |  |            |  |  |  |                                                                                                                                                                                                                                                                                                                                                                                                                                                                                                                                                                              |           |           |        |           |            |            |           |              |             |            |                                                  |                                           |                 |                                                  |                          |
| 0.000                                                                                                                                                                                                                                                                                                                                                                                                                                                                                                                                                                                                                                                                                                                                                                                                                                                                                                                                                                                                                                                                                                                                                                                                                                                                                                                                                                                                                                                                                                                                                                                                                                                                                                                                                                                                                                                                                                                                                                                                                                                                                                                                                                                                                                                                                                                                                                                                                                                                                                                                  | 999%   | 0.000   | Ala           |            |       |      |       |     |       |      |       |    |       |     |       |     |       |      |       |     |       |      |       |     |       |     |       |     |       |      |       |     |       |     |       |     |       |      |       |     |        |    |        |     |       |     |       |     |       |     |       |      |          |      |         |        |       |     |       |     |          |      |       |        |       |     |       |         |       |     |       |          |       |     |       |        |       |     |       |         |       |      |       |        |       |      |       |        |          |      |         |       |       |      |       |               |             |  |  |  |   |        |        |    |   |        |        |   |   |      |        |   |                      |  |  |  |                               |  |  |  |                        |  |  |  |                                      |  |  |  |               |  |  |  |                   |  |  |  |               |  |  |  |                                                  |  |  |  |                                   |  |  |  |                    |  |  |  |           |  |  |  |           |  |  |  |            |  |  |  |                                                                                                                                                                                                                                                                                                                                                                                                                                                                                                                                                                              |           |           |        |           |            |            |           |              |             |            |                                                  |                                           |                 |                                                  |                          |
| 0.000                                                                                                                                                                                                                                                                                                                                                                                                                                                                                                                                                                                                                                                                                                                                                                                                                                                                                                                                                                                                                                                                                                                                                                                                                                                                                                                                                                                                                                                                                                                                                                                                                                                                                                                                                                                                                                                                                                                                                                                                                                                                                                                                                                                                                                                                                                                                                                                                                                                                                                                                  | 999%   | 0.000   | Cr            |            |       |      |       |     |       |      |       |    |       |     |       |     |       |      |       |     |       |      |       |     |       |     |       |     |       |      |       |     |       |     |       |     |       |      |       |     |        |    |        |     |       |     |       |     |       |     |       |      |          |      |         |        |       |     |       |     |          |      |       |        |       |     |       |         |       |     |       |          |       |     |       |        |       |     |       |         |       |      |       |        |       |      |       |        |          |      |         |       |       |      |       |               |             |  |  |  |   |        |        |    |   |        |        |   |   |      |        |   |                      |  |  |  |                               |  |  |  |                        |  |  |  |                                      |  |  |  |               |  |  |  |                   |  |  |  |               |  |  |  |                                                  |  |  |  |                                   |  |  |  |                    |  |  |  |           |  |  |  |           |  |  |  |            |  |  |  |                                                                                                                                                                                                                                                                                                                                                                                                                                                                                                                                                                              |           |           |        |           |            |            |           |              |             |            |                                                  |                                           |                 |                                                  |                          |
| 0.778                                                                                                                                                                                                                                                                                                                                                                                                                                                                                                                                                                                                                                                                                                                                                                                                                                                                                                                                                                                                                                                                                                                                                                                                                                                                                                                                                                                                                                                                                                                                                                                                                                                                                                                                                                                                                                                                                                                                                                                                                                                                                                                                                                                                                                                                                                                                                                                                                                                                                                                                  | 59%    | 0.873   | PCr           |            |       |      |       |     |       |      |       |    |       |     |       |     |       |      |       |     |       |      |       |     |       |     |       |     |       |      |       |     |       |     |       |     |       |      |       |     |        |    |        |     |       |     |       |     |       |     |       |      |          |      |         |        |       |     |       |     |          |      |       |        |       |     |       |         |       |     |       |          |       |     |       |        |       |     |       |         |       |      |       |        |       |      |       |        |          |      |         |       |       |      |       |               |             |  |  |  |   |        |        |    |   |        |        |   |   |      |        |   |                      |  |  |  |                               |  |  |  |                        |  |  |  |                                      |  |  |  |               |  |  |  |                   |  |  |  |               |  |  |  |                                                  |  |  |  |                                   |  |  |  |                    |  |  |  |           |  |  |  |           |  |  |  |            |  |  |  |                                                                                                                                                                                                                                                                                                                                                                                                                                                                                                                                                                              |           |           |        |           |            |            |           |              |             |            |                                                  |                                           |                 |                                                  |                          |
| 1.960                                                                                                                                                                                                                                                                                                                                                                                                                                                                                                                                                                                                                                                                                                                                                                                                                                                                                                                                                                                                                                                                                                                                                                                                                                                                                                                                                                                                                                                                                                                                                                                                                                                                                                                                                                                                                                                                                                                                                                                                                                                                                                                                                                                                                                                                                                                                                                                                                                                                                                                                  | 113%   | 2.198   | Gln           |            |       |      |       |     |       |      |       |    |       |     |       |     |       |      |       |     |       |      |       |     |       |     |       |     |       |      |       |     |       |     |       |     |       |      |       |     |        |    |        |     |       |     |       |     |       |     |       |      |          |      |         |        |       |     |       |     |          |      |       |        |       |     |       |         |       |     |       |          |       |     |       |        |       |     |       |         |       |      |       |        |       |      |       |        |          |      |         |       |       |      |       |               |             |  |  |  |   |        |        |    |   |        |        |   |   |      |        |   |                      |  |  |  |                               |  |  |  |                        |  |  |  |                                      |  |  |  |               |  |  |  |                   |  |  |  |               |  |  |  |                                                  |  |  |  |                                   |  |  |  |                    |  |  |  |           |  |  |  |           |  |  |  |            |  |  |  |                                                                                                                                                                                                                                                                                                                                                                                                                                                                                                                                                                              |           |           |        |           |            |            |           |              |             |            |                                                  |                                           |                 |                                                  |                          |
| 1.381                                                                                                                                                                                                                                                                                                                                                                                                                                                                                                                                                                                                                                                                                                                                                                                                                                                                                                                                                                                                                                                                                                                                                                                                                                                                                                                                                                                                                                                                                                                                                                                                                                                                                                                                                                                                                                                                                                                                                                                                                                                                                                                                                                                                                                                                                                                                                                                                                                                                                                                                  | 138%   | 1.549   | Glu           |            |       |      |       |     |       |      |       |    |       |     |       |     |       |      |       |     |       |      |       |     |       |     |       |     |       |      |       |     |       |     |       |     |       |      |       |     |        |    |        |     |       |     |       |     |       |     |       |      |          |      |         |        |       |     |       |     |          |      |       |        |       |     |       |         |       |     |       |          |       |     |       |        |       |     |       |         |       |      |       |        |       |      |       |        |          |      |         |       |       |      |       |               |             |  |  |  |   |        |        |    |   |        |        |   |   |      |        |   |                      |  |  |  |                               |  |  |  |                        |  |  |  |                                      |  |  |  |               |  |  |  |                   |  |  |  |               |  |  |  |                                                  |  |  |  |                                   |  |  |  |                    |  |  |  |           |  |  |  |           |  |  |  |            |  |  |  |                                                                                                                                                                                                                                                                                                                                                                                                                                                                                                                                                                              |           |           |        |           |            |            |           |              |             |            |                                                  |                                           |                 |                                                  |                          |
| 0.892                                                                                                                                                                                                                                                                                                                                                                                                                                                                                                                                                                                                                                                                                                                                                                                                                                                                                                                                                                                                                                                                                                                                                                                                                                                                                                                                                                                                                                                                                                                                                                                                                                                                                                                                                                                                                                                                                                                                                                                                                                                                                                                                                                                                                                                                                                                                                                                                                                                                                                                                  | 18%    | 1.000   | GPC           |            |       |      |       |     |       |      |       |    |       |     |       |     |       |      |       |     |       |      |       |     |       |     |       |     |       |      |       |     |       |     |       |     |       |      |       |     |        |    |        |     |       |     |       |     |       |     |       |      |          |      |         |        |       |     |       |     |          |      |       |        |       |     |       |         |       |     |       |          |       |     |       |        |       |     |       |         |       |      |       |        |       |      |       |        |          |      |         |       |       |      |       |               |             |  |  |  |   |        |        |    |   |        |        |   |   |      |        |   |                      |  |  |  |                               |  |  |  |                        |  |  |  |                                      |  |  |  |               |  |  |  |                   |  |  |  |               |  |  |  |                                                  |  |  |  |                                   |  |  |  |                    |  |  |  |           |  |  |  |           |  |  |  |            |  |  |  |                                                                                                                                                                                                                                                                                                                                                                                                                                                                                                                                                                              |           |           |        |           |            |            |           |              |             |            |                                                  |                                           |                 |                                                  |                          |
| 0.000                                                                                                                                                                                                                                                                                                                                                                                                                                                                                                                                                                                                                                                                                                                                                                                                                                                                                                                                                                                                                                                                                                                                                                                                                                                                                                                                                                                                                                                                                                                                                                                                                                                                                                                                                                                                                                                                                                                                                                                                                                                                                                                                                                                                                                                                                                                                                                                                                                                                                                                                  | 999%   | 0.000   | PCh           |            |       |      |       |     |       |      |       |    |       |     |       |     |       |      |       |     |       |      |       |     |       |     |       |     |       |      |       |     |       |     |       |     |       |      |       |     |        |    |        |     |       |     |       |     |       |     |       |      |          |      |         |        |       |     |       |     |          |      |       |        |       |     |       |         |       |     |       |          |       |     |       |        |       |     |       |         |       |      |       |        |       |      |       |        |          |      |         |       |       |      |       |               |             |  |  |  |   |        |        |    |   |        |        |   |   |      |        |   |                      |  |  |  |                               |  |  |  |                        |  |  |  |                                      |  |  |  |               |  |  |  |                   |  |  |  |               |  |  |  |                                                  |  |  |  |                                   |  |  |  |                    |  |  |  |           |  |  |  |           |  |  |  |            |  |  |  |                                                                                                                                                                                                                                                                                                                                                                                                                                                                                                                                                                              |           |           |        |           |            |            |           |              |             |            |                                                  |                                           |                 |                                                  |                          |
| 1.088                                                                                                                                                                                                                                                                                                                                                                                                                                                                                                                                                                                                                                                                                                                                                                                                                                                                                                                                                                                                                                                                                                                                                                                                                                                                                                                                                                                                                                                                                                                                                                                                                                                                                                                                                                                                                                                                                                                                                                                                                                                                                                                                                                                                                                                                                                                                                                                                                                                                                                                                  | 61%    | 1.220   | GSH           |            |       |      |       |     |       |      |       |    |       |     |       |     |       |      |       |     |       |      |       |     |       |     |       |     |       |      |       |     |       |     |       |     |       |      |       |     |        |    |        |     |       |     |       |     |       |     |       |      |          |      |         |        |       |     |       |     |          |      |       |        |       |     |       |         |       |     |       |          |       |     |       |        |       |     |       |         |       |      |       |        |       |      |       |        |          |      |         |       |       |      |       |               |             |  |  |  |   |        |        |    |   |        |        |   |   |      |        |   |                      |  |  |  |                               |  |  |  |                        |  |  |  |                                      |  |  |  |               |  |  |  |                   |  |  |  |               |  |  |  |                                                  |  |  |  |                                   |  |  |  |                    |  |  |  |           |  |  |  |           |  |  |  |            |  |  |  |                                                                                                                                                                                                                                                                                                                                                                                                                                                                                                                                                                              |           |           |        |           |            |            |           |              |             |            |                                                  |                                           |                 |                                                  |                          |
| 0.000                                                                                                                                                                                                                                                                                                                                                                                                                                                                                                                                                                                                                                                                                                                                                                                                                                                                                                                                                                                                                                                                                                                                                                                                                                                                                                                                                                                                                                                                                                                                                                                                                                                                                                                                                                                                                                                                                                                                                                                                                                                                                                                                                                                                                                                                                                                                                                                                                                                                                                                                  | 999%   | 0.000   | Ins           |            |       |      |       |     |       |      |       |    |       |     |       |     |       |      |       |     |       |      |       |     |       |     |       |     |       |      |       |     |       |     |       |     |       |      |       |     |        |    |        |     |       |     |       |     |       |     |       |      |          |      |         |        |       |     |       |     |          |      |       |        |       |     |       |         |       |     |       |          |       |     |       |        |       |     |       |         |       |      |       |        |       |      |       |        |          |      |         |       |       |      |       |               |             |  |  |  |   |        |        |    |   |        |        |   |   |      |        |   |                      |  |  |  |                               |  |  |  |                        |  |  |  |                                      |  |  |  |               |  |  |  |                   |  |  |  |               |  |  |  |                                                  |  |  |  |                                   |  |  |  |                    |  |  |  |           |  |  |  |           |  |  |  |            |  |  |  |                                                                                                                                                                                                                                                                                                                                                                                                                                                                                                                                                                              |           |           |        |           |            |            |           |              |             |            |                                                  |                                           |                 |                                                  |                          |
| 16.384                                                                                                                                                                                                                                                                                                                                                                                                                                                                                                                                                                                                                                                                                                                                                                                                                                                                                                                                                                                                                                                                                                                                                                                                                                                                                                                                                                                                                                                                                                                                                                                                                                                                                                                                                                                                                                                                                                                                                                                                                                                                                                                                                                                                                                                                                                                                                                                                                                                                                                                                 | 4%     | 18.370  | Lac           |            |       |      |       |     |       |      |       |    |       |     |       |     |       |      |       |     |       |      |       |     |       |     |       |     |       |      |       |     |       |     |       |     |       |      |       |     |        |    |        |     |       |     |       |     |       |     |       |      |          |      |         |        |       |     |       |     |          |      |       |        |       |     |       |         |       |     |       |          |       |     |       |        |       |     |       |         |       |      |       |        |       |      |       |        |          |      |         |       |       |      |       |               |             |  |  |  |   |        |        |    |   |        |        |   |   |      |        |   |                      |  |  |  |                               |  |  |  |                        |  |  |  |                                      |  |  |  |               |  |  |  |                   |  |  |  |               |  |  |  |                                                  |  |  |  |                                   |  |  |  |                    |  |  |  |           |  |  |  |           |  |  |  |            |  |  |  |                                                                                                                                                                                                                                                                                                                                                                                                                                                                                                                                                                              |           |           |        |           |            |            |           |              |             |            |                                                  |                                           |                 |                                                  |                          |
| 2.012                                                                                                                                                                                                                                                                                                                                                                                                                                                                                                                                                                                                                                                                                                                                                                                                                                                                                                                                                                                                                                                                                                                                                                                                                                                                                                                                                                                                                                                                                                                                                                                                                                                                                                                                                                                                                                                                                                                                                                                                                                                                                                                                                                                                                                                                                                                                                                                                                                                                                                                                  | 23%    | 2.257   | NAA           |            |       |      |       |     |       |      |       |    |       |     |       |     |       |      |       |     |       |      |       |     |       |     |       |     |       |      |       |     |       |     |       |     |       |      |       |     |        |    |        |     |       |     |       |     |       |     |       |      |          |      |         |        |       |     |       |     |          |      |       |        |       |     |       |         |       |     |       |          |       |     |       |        |       |     |       |         |       |      |       |        |       |      |       |        |          |      |         |       |       |      |       |               |             |  |  |  |   |        |        |    |   |        |        |   |   |      |        |   |                      |  |  |  |                               |  |  |  |                        |  |  |  |                                      |  |  |  |               |  |  |  |                   |  |  |  |               |  |  |  |                                                  |  |  |  |                                   |  |  |  |                    |  |  |  |           |  |  |  |           |  |  |  |            |  |  |  |                                                                                                                                                                                                                                                                                                                                                                                                                                                                                                                                                                              |           |           |        |           |            |            |           |              |             |            |                                                  |                                           |                 |                                                  |                          |
| 0.357                                                                                                                                                                                                                                                                                                                                                                                                                                                                                                                                                                                                                                                                                                                                                                                                                                                                                                                                                                                                                                                                                                                                                                                                                                                                                                                                                                                                                                                                                                                                                                                                                                                                                                                                                                                                                                                                                                                                                                                                                                                                                                                                                                                                                                                                                                                                                                                                                                                                                                                                  | 48%    | 0.401   | NAAG          |            |       |      |       |     |       |      |       |    |       |     |       |     |       |      |       |     |       |      |       |     |       |     |       |     |       |      |       |     |       |     |       |     |       |      |       |     |        |    |        |     |       |     |       |     |       |     |       |      |          |      |         |        |       |     |       |     |          |      |       |        |       |     |       |         |       |     |       |          |       |     |       |        |       |     |       |         |       |      |       |        |       |      |       |        |          |      |         |       |       |      |       |               |             |  |  |  |   |        |        |    |   |        |        |   |   |      |        |   |                      |  |  |  |                               |  |  |  |                        |  |  |  |                                      |  |  |  |               |  |  |  |                   |  |  |  |               |  |  |  |                                                  |  |  |  |                                   |  |  |  |                    |  |  |  |           |  |  |  |           |  |  |  |            |  |  |  |                                                                                                                                                                                                                                                                                                                                                                                                                                                                                                                                                                              |           |           |        |           |            |            |           |              |             |            |                                                  |                                           |                 |                                                  |                          |
| 4.69E-02                                                                                                                                                                                                                                                                                                                                                                                                                                                                                                                                                                                                                                                                                                                                                                                                                                                                                                                                                                                                                                                                                                                                                                                                                                                                                                                                                                                                                                                                                                                                                                                                                                                                                                                                                                                                                                                                                                                                                                                                                                                                                                                                                                                                                                                                                                                                                                                                                                                                                                                               | 114%   | 5.3E-02 | Scyllo        |            |       |      |       |     |       |      |       |    |       |     |       |     |       |      |       |     |       |      |       |     |       |     |       |     |       |      |       |     |       |     |       |     |       |      |       |     |        |    |        |     |       |     |       |     |       |     |       |      |          |      |         |        |       |     |       |     |          |      |       |        |       |     |       |         |       |     |       |          |       |     |       |        |       |     |       |         |       |      |       |        |       |      |       |        |          |      |         |       |       |      |       |               |             |  |  |  |   |        |        |    |   |        |        |   |   |      |        |   |                      |  |  |  |                               |  |  |  |                        |  |  |  |                                      |  |  |  |               |  |  |  |                   |  |  |  |               |  |  |  |                                                  |  |  |  |                                   |  |  |  |                    |  |  |  |           |  |  |  |           |  |  |  |            |  |  |  |                                                                                                                                                                                                                                                                                                                                                                                                                                                                                                                                                                              |           |           |        |           |            |            |           |              |             |            |                                                  |                                           |                 |                                                  |                          |
| 0.305                                                                                                                                                                                                                                                                                                                                                                                                                                                                                                                                                                                                                                                                                                                                                                                                                                                                                                                                                                                                                                                                                                                                                                                                                                                                                                                                                                                                                                                                                                                                                                                                                                                                                                                                                                                                                                                                                                                                                                                                                                                                                                                                                                                                                                                                                                                                                                                                                                                                                                                                  | 87%    | 0.342   | Tau           |            |       |      |       |     |       |      |       |    |       |     |       |     |       |      |       |     |       |      |       |     |       |     |       |     |       |      |       |     |       |     |       |     |       |      |       |     |        |    |        |     |       |     |       |     |       |     |       |      |          |      |         |        |       |     |       |     |          |      |       |        |       |     |       |         |       |     |       |          |       |     |       |        |       |     |       |         |       |      |       |        |       |      |       |        |          |      |         |       |       |      |       |               |             |  |  |  |   |        |        |    |   |        |        |   |   |      |        |   |                      |  |  |  |                               |  |  |  |                        |  |  |  |                                      |  |  |  |               |  |  |  |                   |  |  |  |               |  |  |  |                                                  |  |  |  |                                   |  |  |  |                    |  |  |  |           |  |  |  |           |  |  |  |            |  |  |  |                                                                                                                                                                                                                                                                                                                                                                                                                                                                                                                                                                              |           |           |        |           |            |            |           |              |             |            |                                                  |                                           |                 |                                                  |                          |
| 9.86E-02                                                                                                                                                                                                                                                                                                                                                                                                                                                                                                                                                                                                                                                                                                                                                                                                                                                                                                                                                                                                                                                                                                                                                                                                                                                                                                                                                                                                                                                                                                                                                                                                                                                                                                                                                                                                                                                                                                                                                                                                                                                                                                                                                                                                                                                                                                                                                                                                                                                                                                                               | 199%   | 0.111   | -CrCH2        |            |       |      |       |     |       |      |       |    |       |     |       |     |       |      |       |     |       |      |       |     |       |     |       |     |       |      |       |     |       |     |       |     |       |      |       |     |        |    |        |     |       |     |       |     |       |     |       |      |          |      |         |        |       |     |       |     |          |      |       |        |       |     |       |         |       |     |       |          |       |     |       |        |       |     |       |         |       |      |       |        |       |      |       |        |          |      |         |       |       |      |       |               |             |  |  |  |   |        |        |    |   |        |        |   |   |      |        |   |                      |  |  |  |                               |  |  |  |                        |  |  |  |                                      |  |  |  |               |  |  |  |                   |  |  |  |               |  |  |  |                                                  |  |  |  |                                   |  |  |  |                    |  |  |  |           |  |  |  |           |  |  |  |            |  |  |  |                                                                                                                                                                                                                                                                                                                                                                                                                                                                                                                                                                              |           |           |        |           |            |            |           |              |             |            |                                                  |                                           |                 |                                                  |                          |
| 0.892                                                                                                                                                                                                                                                                                                                                                                                                                                                                                                                                                                                                                                                                                                                                                                                                                                                                                                                                                                                                                                                                                                                                                                                                                                                                                                                                                                                                                                                                                                                                                                                                                                                                                                                                                                                                                                                                                                                                                                                                                                                                                                                                                                                                                                                                                                                                                                                                                                                                                                                                  | 18%    | 1.000   | GPC+PCh       |            |       |      |       |     |       |      |       |    |       |     |       |     |       |      |       |     |       |      |       |     |       |     |       |     |       |      |       |     |       |     |       |     |       |      |       |     |        |    |        |     |       |     |       |     |       |     |       |      |          |      |         |        |       |     |       |     |          |      |       |        |       |     |       |         |       |     |       |          |       |     |       |        |       |     |       |         |       |      |       |        |       |      |       |        |          |      |         |       |       |      |       |               |             |  |  |  |   |        |        |    |   |        |        |   |   |      |        |   |                      |  |  |  |                               |  |  |  |                        |  |  |  |                                      |  |  |  |               |  |  |  |                   |  |  |  |               |  |  |  |                                                  |  |  |  |                                   |  |  |  |                    |  |  |  |           |  |  |  |           |  |  |  |            |  |  |  |                                                                                                                                                                                                                                                                                                                                                                                                                                                                                                                                                                              |           |           |        |           |            |            |           |              |             |            |                                                  |                                           |                 |                                                  |                          |
| 2.370                                                                                                                                                                                                                                                                                                                                                                                                                                                                                                                                                                                                                                                                                                                                                                                                                                                                                                                                                                                                                                                                                                                                                                                                                                                                                                                                                                                                                                                                                                                                                                                                                                                                                                                                                                                                                                                                                                                                                                                                                                                                                                                                                                                                                                                                                                                                                                                                                                                                                                                                  | 21%    | 2.657   | NAA+NAAG      |            |       |      |       |     |       |      |       |    |       |     |       |     |       |      |       |     |       |      |       |     |       |     |       |     |       |      |       |     |       |     |       |     |       |      |       |     |        |    |        |     |       |     |       |     |       |     |       |      |          |      |         |        |       |     |       |     |          |      |       |        |       |     |       |         |       |     |       |          |       |     |       |        |       |     |       |         |       |      |       |        |       |      |       |        |          |      |         |       |       |      |       |               |             |  |  |  |   |        |        |    |   |        |        |   |   |      |        |   |                      |  |  |  |                               |  |  |  |                        |  |  |  |                                      |  |  |  |               |  |  |  |                   |  |  |  |               |  |  |  |                                                  |  |  |  |                                   |  |  |  |                    |  |  |  |           |  |  |  |           |  |  |  |            |  |  |  |                                                                                                                                                                                                                                                                                                                                                                                                                                                                                                                                                                              |           |           |        |           |            |            |           |              |             |            |                                                  |                                           |                 |                                                  |                          |
| 0.778                                                                                                                                                                                                                                                                                                                                                                                                                                                                                                                                                                                                                                                                                                                                                                                                                                                                                                                                                                                                                                                                                                                                                                                                                                                                                                                                                                                                                                                                                                                                                                                                                                                                                                                                                                                                                                                                                                                                                                                                                                                                                                                                                                                                                                                                                                                                                                                                                                                                                                                                  | 59%    | 0.873   | Cr+PCr        |            |       |      |       |     |       |      |       |    |       |     |       |     |       |      |       |     |       |      |       |     |       |     |       |     |       |      |       |     |       |     |       |     |       |      |       |     |        |    |        |     |       |     |       |     |       |     |       |      |          |      |         |        |       |     |       |     |          |      |       |        |       |     |       |         |       |     |       |          |       |     |       |        |       |     |       |         |       |      |       |        |       |      |       |        |          |      |         |       |       |      |       |               |             |  |  |  |   |        |        |    |   |        |        |   |   |      |        |   |                      |  |  |  |                               |  |  |  |                        |  |  |  |                                      |  |  |  |               |  |  |  |                   |  |  |  |               |  |  |  |                                                  |  |  |  |                                   |  |  |  |                    |  |  |  |           |  |  |  |           |  |  |  |            |  |  |  |                                                                                                                                                                                                                                                                                                                                                                                                                                                                                                                                                                              |           |           |        |           |            |            |           |              |             |            |                                                  |                                           |                 |                                                  |                          |
| 3.341                                                                                                                                                                                                                                                                                                                                                                                                                                                                                                                                                                                                                                                                                                                                                                                                                                                                                                                                                                                                                                                                                                                                                                                                                                                                                                                                                                                                                                                                                                                                                                                                                                                                                                                                                                                                                                                                                                                                                                                                                                                                                                                                                                                                                                                                                                                                                                                                                                                                                                                                  | 51%    | 3.746   | Glu+Gln       |            |       |      |       |     |       |      |       |    |       |     |       |     |       |      |       |     |       |      |       |     |       |     |       |     |       |      |       |     |       |     |       |     |       |      |       |     |        |    |        |     |       |     |       |     |       |     |       |      |          |      |         |        |       |     |       |     |          |      |       |        |       |     |       |         |       |     |       |          |       |     |       |        |       |     |       |         |       |      |       |        |       |      |       |        |          |      |         |       |       |      |       |               |             |  |  |  |   |        |        |    |   |        |        |   |   |      |        |   |                      |  |  |  |                               |  |  |  |                        |  |  |  |                                      |  |  |  |               |  |  |  |                   |  |  |  |               |  |  |  |                                                  |  |  |  |                                   |  |  |  |                    |  |  |  |           |  |  |  |           |  |  |  |            |  |  |  |                                                                                                                                                                                                                                                                                                                                                                                                                                                                                                                                                                              |           |           |        |           |            |            |           |              |             |            |                                                  |                                           |                 |                                                  |                          |
| 0.000                                                                                                                                                                                                                                                                                                                                                                                                                                                                                                                                                                                                                                                                                                                                                                                                                                                                                                                                                                                                                                                                                                                                                                                                                                                                                                                                                                                                                                                                                                                                                                                                                                                                                                                                                                                                                                                                                                                                                                                                                                                                                                                                                                                                                                                                                                                                                                                                                                                                                                                                  | 999%   | 0.000   | Lip13a        |            |       |      |       |     |       |      |       |    |       |     |       |     |       |      |       |     |       |      |       |     |       |     |       |     |       |      |       |     |       |     |       |     |       |      |       |     |        |    |        |     |       |     |       |     |       |     |       |      |          |      |         |        |       |     |       |     |          |      |       |        |       |     |       |         |       |     |       |          |       |     |       |        |       |     |       |         |       |      |       |        |       |      |       |        |          |      |         |       |       |      |       |               |             |  |  |  |   |        |        |    |   |        |        |   |   |      |        |   |                      |  |  |  |                               |  |  |  |                        |  |  |  |                                      |  |  |  |               |  |  |  |                   |  |  |  |               |  |  |  |                                                  |  |  |  |                                   |  |  |  |                    |  |  |  |           |  |  |  |           |  |  |  |            |  |  |  |                                                                                                                                                                                                                                                                                                                                                                                                                                                                                                                                                                              |           |           |        |           |            |            |           |              |             |            |                                                  |                                           |                 |                                                  |                          |
| 0.000                                                                                                                                                                                                                                                                                                                                                                                                                                                                                                                                                                                                                                                                                                                                                                                                                                                                                                                                                                                                                                                                                                                                                                                                                                                                                                                                                                                                                                                                                                                                                                                                                                                                                                                                                                                                                                                                                                                                                                                                                                                                                                                                                                                                                                                                                                                                                                                                                                                                                                                                  | 999%   | 0.000   | Lip13b        |            |       |      |       |     |       |      |       |    |       |     |       |     |       |      |       |     |       |      |       |     |       |     |       |     |       |      |       |     |       |     |       |     |       |      |       |     |        |    |        |     |       |     |       |     |       |     |       |      |          |      |         |        |       |     |       |     |          |      |       |        |       |     |       |         |       |     |       |          |       |     |       |        |       |     |       |         |       |      |       |        |       |      |       |        |          |      |         |       |       |      |       |               |             |  |  |  |   |        |        |    |   |        |        |   |   |      |        |   |                      |  |  |  |                               |  |  |  |                        |  |  |  |                                      |  |  |  |               |  |  |  |                   |  |  |  |               |  |  |  |                                                  |  |  |  |                                   |  |  |  |                    |  |  |  |           |  |  |  |           |  |  |  |            |  |  |  |                                                                                                                                                                                                                                                                                                                                                                                                                                                                                                                                                                              |           |           |        |           |            |            |           |              |             |            |                                                  |                                           |                 |                                                  |                          |
| 2.40E-06                                                                                                                                                                                                                                                                                                                                                                                                                                                                                                                                                                                                                                                                                                                                                                                                                                                                                                                                                                                                                                                                                                                                                                                                                                                                                                                                                                                                                                                                                                                                                                                                                                                                                                                                                                                                                                                                                                                                                                                                                                                                                                                                                                                                                                                                                                                                                                                                                                                                                                                               | 999%   | 2.7E-06 | Lip20         |            |       |      |       |     |       |      |       |    |       |     |       |     |       |      |       |     |       |      |       |     |       |     |       |     |       |      |       |     |       |     |       |     |       |      |       |     |        |    |        |     |       |     |       |     |       |     |       |      |          |      |         |        |       |     |       |     |          |      |       |        |       |     |       |         |       |     |       |          |       |     |       |        |       |     |       |         |       |      |       |        |       |      |       |        |          |      |         |       |       |      |       |               |             |  |  |  |   |        |        |    |   |        |        |   |   |      |        |   |                      |  |  |  |                               |  |  |  |                        |  |  |  |                                      |  |  |  |               |  |  |  |                   |  |  |  |               |  |  |  |                                                  |  |  |  |                                   |  |  |  |                    |  |  |  |           |  |  |  |           |  |  |  |            |  |  |  |                                                                                                                                                                                                                                                                                                                                                                                                                                                                                                                                                                              |           |           |        |           |            |            |           |              |             |            |                                                  |                                           |                 |                                                  |                          |
| 0.000                                                                                                                                                                                                                                                                                                                                                                                                                                                                                                                                                                                                                                                                                                                                                                                                                                                                                                                                                                                                                                                                                                                                                                                                                                                                                                                                                                                                                                                                                                                                                                                                                                                                                                                                                                                                                                                                                                                                                                                                                                                                                                                                                                                                                                                                                                                                                                                                                                                                                                                                  | 999%   | 0.000   | Lip13a+Lip13b |            |       |      |       |     |       |      |       |    |       |     |       |     |       |      |       |     |       |      |       |     |       |     |       |     |       |      |       |     |       |     |       |     |       |      |       |     |        |    |        |     |       |     |       |     |       |     |       |      |          |      |         |        |       |     |       |     |          |      |       |        |       |     |       |         |       |     |       |          |       |     |       |        |       |     |       |         |       |      |       |        |       |      |       |        |          |      |         |       |       |      |       |               |             |  |  |  |   |        |        |    |   |        |        |   |   |      |        |   |                      |  |  |  |                               |  |  |  |                        |  |  |  |                                      |  |  |  |               |  |  |  |                   |  |  |  |               |  |  |  |                                                  |  |  |  |                                   |  |  |  |                    |  |  |  |           |  |  |  |           |  |  |  |            |  |  |  |                                                                                                                                                                                                                                                                                                                                                                                                                                                                                                                                                                              |           |           |        |           |            |            |           |              |             |            |                                                  |                                           |                 |                                                  |                          |
| DIAGNOSTICS                                                                                                                                                                                                                                                                                                                                                                                                                                                                                                                                                                                                                                                                                                                                                                                                                                                                                                                                                                                                                                                                                                                                                                                                                                                                                                                                                                                                                                                                                                                                                                                                                                                                                                                                                                                                                                                                                                                                                                                                                                                                                                                                                                                                                                                                                                                                                                                                                                                                                                                            |        |         |               |            |       |      |       |     |       |      |       |    |       |     |       |     |       |      |       |     |       |      |       |     |       |     |       |     |       |      |       |     |       |     |       |     |       |      |       |     |        |    |        |     |       |     |       |     |       |     |       |      |          |      |         |        |       |     |       |     |          |      |       |        |       |     |       |         |       |     |       |          |       |     |       |        |       |     |       |         |       |      |       |        |       |      |       |        |          |      |         |       |       |      |       |               |             |  |  |  |   |        |        |    |   |        |        |   |   |      |        |   |                      |  |  |  |                               |  |  |  |                        |  |  |  |                                      |  |  |  |               |  |  |  |                   |  |  |  |               |  |  |  |                                                  |  |  |  |                                   |  |  |  |                    |  |  |  |           |  |  |  |           |  |  |  |            |  |  |  |                                                                                                                                                                                                                                                                                                                                                                                                                                                                                                                                                                              |           |           |        |           |            |            |           |              |             |            |                                                  |                                           |                 |                                                  |                          |
| 7                                                                                                                                                                                                                                                                                                                                                                                                                                                                                                                                                                                                                                                                                                                                                                                                                                                                                                                                                                                                                                                                                                                                                                                                                                                                                                                                                                                                                                                                                                                                                                                                                                                                                                                                                                                                                                                                                                                                                                                                                                                                                                                                                                                                                                                                                                                                                                                                                                                                                                                                      | info's | RFALSI  | 11            |            |       |      |       |     |       |      |       |    |       |     |       |     |       |      |       |     |       |      |       |     |       |     |       |     |       |      |       |     |       |     |       |     |       |      |       |     |        |    |        |     |       |     |       |     |       |     |       |      |          |      |         |        |       |     |       |     |          |      |       |        |       |     |       |         |       |     |       |          |       |     |       |        |       |     |       |         |       |      |       |        |       |      |       |        |          |      |         |       |       |      |       |               |             |  |  |  |   |        |        |    |   |        |        |   |   |      |        |   |                      |  |  |  |                               |  |  |  |                        |  |  |  |                                      |  |  |  |               |  |  |  |                   |  |  |  |               |  |  |  |                                                  |  |  |  |                                   |  |  |  |                    |  |  |  |           |  |  |  |           |  |  |  |            |  |  |  |                                                                                                                                                                                                                                                                                                                                                                                                                                                                                                                                                                              |           |           |        |           |            |            |           |              |             |            |                                                  |                                           |                 |                                                  |                          |
| 3                                                                                                                                                                                                                                                                                                                                                                                                                                                                                                                                                                                                                                                                                                                                                                                                                                                                                                                                                                                                                                                                                                                                                                                                                                                                                                                                                                                                                                                                                                                                                                                                                                                                                                                                                                                                                                                                                                                                                                                                                                                                                                                                                                                                                                                                                                                                                                                                                                                                                                                                      | info's | RFALSI  | 4             |            |       |      |       |     |       |      |       |    |       |     |       |     |       |      |       |     |       |      |       |     |       |     |       |     |       |      |       |     |       |     |       |     |       |      |       |     |        |    |        |     |       |     |       |     |       |     |       |      |          |      |         |        |       |     |       |     |          |      |       |        |       |     |       |         |       |     |       |          |       |     |       |        |       |     |       |         |       |      |       |        |       |      |       |        |          |      |         |       |       |      |       |               |             |  |  |  |   |        |        |    |   |        |        |   |   |      |        |   |                      |  |  |  |                               |  |  |  |                        |  |  |  |                                      |  |  |  |               |  |  |  |                   |  |  |  |               |  |  |  |                                                  |  |  |  |                                   |  |  |  |                    |  |  |  |           |  |  |  |           |  |  |  |            |  |  |  |                                                                                                                                                                                                                                                                                                                                                                                                                                                                                                                                                                              |           |           |        |           |            |            |           |              |             |            |                                                  |                                           |                 |                                                  |                          |
| 1                                                                                                                                                                                                                                                                                                                                                                                                                                                                                                                                                                                                                                                                                                                                                                                                                                                                                                                                                                                                                                                                                                                                                                                                                                                                                                                                                                                                                                                                                                                                                                                                                                                                                                                                                                                                                                                                                                                                                                                                                                                                                                                                                                                                                                                                                                                                                                                                                                                                                                                                      | info   | TWOREG  | 8             |            |       |      |       |     |       |      |       |    |       |     |       |     |       |      |       |     |       |      |       |     |       |     |       |     |       |      |       |     |       |     |       |     |       |      |       |     |        |    |        |     |       |     |       |     |       |     |       |      |          |      |         |        |       |     |       |     |          |      |       |        |       |     |       |         |       |     |       |          |       |     |       |        |       |     |       |         |       |      |       |        |       |      |       |        |          |      |         |       |       |      |       |               |             |  |  |  |   |        |        |    |   |        |        |   |   |      |        |   |                      |  |  |  |                               |  |  |  |                        |  |  |  |                                      |  |  |  |               |  |  |  |                   |  |  |  |               |  |  |  |                                                  |  |  |  |                                   |  |  |  |                    |  |  |  |           |  |  |  |           |  |  |  |            |  |  |  |                                                                                                                                                                                                                                                                                                                                                                                                                                                                                                                                                                              |           |           |        |           |            |            |           |              |             |            |                                                  |                                           |                 |                                                  |                          |
| MISCELLANEOUS OUTPUT                                                                                                                                                                                                                                                                                                                                                                                                                                                                                                                                                                                                                                                                                                                                                                                                                                                                                                                                                                                                                                                                                                                                                                                                                                                                                                                                                                                                                                                                                                                                                                                                                                                                                                                                                                                                                                                                                                                                                                                                                                                                                                                                                                                                                                                                                                                                                                                                                                                                                                                   |        |         |               |            |       |      |       |     |       |      |       |    |       |     |       |     |       |      |       |     |       |      |       |     |       |     |       |     |       |      |       |     |       |     |       |     |       |      |       |     |        |    |        |     |       |     |       |     |       |     |       |      |          |      |         |        |       |     |       |     |          |      |       |        |       |     |       |         |       |     |       |          |       |     |       |        |       |     |       |         |       |      |       |        |       |      |       |        |          |      |         |       |       |      |       |               |             |  |  |  |   |        |        |    |   |        |        |   |   |      |        |   |                      |  |  |  |                               |  |  |  |                        |  |  |  |                                      |  |  |  |               |  |  |  |                   |  |  |  |               |  |  |  |                                                  |  |  |  |                                   |  |  |  |                    |  |  |  |           |  |  |  |           |  |  |  |            |  |  |  |                                                                                                                                                                                                                                                                                                                                                                                                                                                                                                                                                                              |           |           |        |           |            |            |           |              |             |            |                                                  |                                           |                 |                                                  |                          |
| FWHM = 0.076 ppm      S/N = 5                                                                                                                                                                                                                                                                                                                                                                                                                                                                                                                                                                                                                                                                                                                                                                                                                                                                                                                                                                                                                                                                                                                                                                                                                                                                                                                                                                                                                                                                                                                                                                                                                                                                                                                                                                                                                                                                                                                                                                                                                                                                                                                                                                                                                                                                                                                                                                                                                                                                                                          |        |         |               |            |       |      |       |     |       |      |       |    |       |     |       |     |       |      |       |     |       |      |       |     |       |     |       |     |       |      |       |     |       |     |       |     |       |      |       |     |        |    |        |     |       |     |       |     |       |     |       |      |          |      |         |        |       |     |       |     |          |      |       |        |       |     |       |         |       |     |       |          |       |     |       |        |       |     |       |         |       |      |       |        |       |      |       |        |          |      |         |       |       |      |       |               |             |  |  |  |   |        |        |    |   |        |        |   |   |      |        |   |                      |  |  |  |                               |  |  |  |                        |  |  |  |                                      |  |  |  |               |  |  |  |                   |  |  |  |               |  |  |  |                                                  |  |  |  |                                   |  |  |  |                    |  |  |  |           |  |  |  |           |  |  |  |            |  |  |  |                                                                                                                                                                                                                                                                                                                                                                                                                                                                                                                                                                              |           |           |        |           |            |            |           |              |             |            |                                                  |                                           |                 |                                                  |                          |
| Data shift = 0.023 ppm                                                                                                                                                                                                                                                                                                                                                                                                                                                                                                                                                                                                                                                                                                                                                                                                                                                                                                                                                                                                                                                                                                                                                                                                                                                                                                                                                                                                                                                                                                                                                                                                                                                                                                                                                                                                                                                                                                                                                                                                                                                                                                                                                                                                                                                                                                                                                                                                                                                                                                                 |        |         |               |            |       |      |       |     |       |      |       |    |       |     |       |     |       |      |       |     |       |      |       |     |       |     |       |     |       |      |       |     |       |     |       |     |       |      |       |     |        |    |        |     |       |     |       |     |       |     |       |      |          |      |         |        |       |     |       |     |          |      |       |        |       |     |       |         |       |     |       |          |       |     |       |        |       |     |       |         |       |      |       |        |       |      |       |        |          |      |         |       |       |      |       |               |             |  |  |  |   |        |        |    |   |        |        |   |   |      |        |   |                      |  |  |  |                               |  |  |  |                        |  |  |  |                                      |  |  |  |               |  |  |  |                   |  |  |  |               |  |  |  |                                                  |  |  |  |                                   |  |  |  |                    |  |  |  |           |  |  |  |           |  |  |  |            |  |  |  |                                                                                                                                                                                                                                                                                                                                                                                                                                                                                                                                                                              |           |           |        |           |            |            |           |              |             |            |                                                  |                                           |                 |                                                  |                          |
| Ph: 29 deg              12.6 deg/ppm                                                                                                                                                                                                                                                                                                                                                                                                                                                                                                                                                                                                                                                                                                                                                                                                                                                                                                                                                                                                                                                                                                                                                                                                                                                                                                                                                                                                                                                                                                                                                                                                                                                                                                                                                                                                                                                                                                                                                                                                                                                                                                                                                                                                                                                                                                                                                                                                                                                                                                   |        |         |               |            |       |      |       |     |       |      |       |    |       |     |       |     |       |      |       |     |       |      |       |     |       |     |       |     |       |      |       |     |       |     |       |     |       |      |       |     |        |    |        |     |       |     |       |     |       |     |       |      |          |      |         |        |       |     |       |     |          |      |       |        |       |     |       |         |       |     |       |          |       |     |       |        |       |     |       |         |       |      |       |        |       |      |       |        |          |      |         |       |       |      |       |               |             |  |  |  |   |        |        |    |   |        |        |   |   |      |        |   |                      |  |  |  |                               |  |  |  |                        |  |  |  |                                      |  |  |  |               |  |  |  |                   |  |  |  |               |  |  |  |                                                  |  |  |  |                                   |  |  |  |                    |  |  |  |           |  |  |  |           |  |  |  |            |  |  |  |                                                                                                                                                                                                                                                                                                                                                                                                                                                                                                                                                                              |           |           |        |           |            |            |           |              |             |            |                                                  |                                           |                 |                                                  |                          |
| INPUT CHANGES                                                                                                                                                                                                                                                                                                                                                                                                                                                                                                                                                                                                                                                                                                                                                                                                                                                                                                                                                                                                                                                                                                                                                                                                                                                                                                                                                                                                                                                                                                                                                                                                                                                                                                                                                                                                                                                                                                                                                                                                                                                                                                                                                                                                                                                                                                                                                                                                                                                                                                                          |        |         |               |            |       |      |       |     |       |      |       |    |       |     |       |     |       |      |       |     |       |      |       |     |       |     |       |     |       |      |       |     |       |     |       |     |       |      |       |     |        |    |        |     |       |     |       |     |       |     |       |      |          |      |         |        |       |     |       |     |          |      |       |        |       |     |       |         |       |     |       |          |       |     |       |        |       |     |       |         |       |      |       |        |       |      |       |        |          |      |         |       |       |      |       |               |             |  |  |  |   |        |        |    |   |        |        |   |   |      |        |   |                      |  |  |  |                               |  |  |  |                        |  |  |  |                                      |  |  |  |               |  |  |  |                   |  |  |  |               |  |  |  |                                                  |  |  |  |                                   |  |  |  |                    |  |  |  |           |  |  |  |           |  |  |  |            |  |  |  |                                                                                                                                                                                                                                                                                                                                                                                                                                                                                                                                                                              |           |           |        |           |            |            |           |              |             |            |                                                  |                                           |                 |                                                  |                          |
| deltat= 5.000e-04                                                                                                                                                                                                                                                                                                                                                                                                                                                                                                                                                                                                                                                                                                                                                                                                                                                                                                                                                                                                                                                                                                                                                                                                                                                                                                                                                                                                                                                                                                                                                                                                                                                                                                                                                                                                                                                                                                                                                                                                                                                                                                                                                                                                                                                                                                                                                                                                                                                                                                                      |        |         |               |            |       |      |       |     |       |      |       |    |       |     |       |     |       |      |       |     |       |      |       |     |       |     |       |     |       |      |       |     |       |     |       |     |       |      |       |     |        |    |        |     |       |     |       |     |       |     |       |      |          |      |         |        |       |     |       |     |          |      |       |        |       |     |       |         |       |     |       |          |       |     |       |        |       |     |       |         |       |      |       |        |       |      |       |        |          |      |         |       |       |      |       |               |             |  |  |  |   |        |        |    |   |        |        |   |   |      |        |   |                      |  |  |  |                               |  |  |  |                        |  |  |  |                                      |  |  |  |               |  |  |  |                   |  |  |  |               |  |  |  |                                                  |  |  |  |                                   |  |  |  |                    |  |  |  |           |  |  |  |           |  |  |  |            |  |  |  |                                                                                                                                                                                                                                                                                                                                                                                                                                                                                                                                                                              |           |           |        |           |            |            |           |              |             |            |                                                  |                                           |                 |                                                  |                          |
| echot= 288.00                                                                                                                                                                                                                                                                                                                                                                                                                                                                                                                                                                                                                                                                                                                                                                                                                                                                                                                                                                                                                                                                                                                                                                                                                                                                                                                                                                                                                                                                                                                                                                                                                                                                                                                                                                                                                                                                                                                                                                                                                                                                                                                                                                                                                                                                                                                                                                                                                                                                                                                          |        |         |               |            |       |      |       |     |       |      |       |    |       |     |       |     |       |      |       |     |       |      |       |     |       |     |       |     |       |      |       |     |       |     |       |     |       |      |       |     |        |    |        |     |       |     |       |     |       |     |       |      |          |      |         |        |       |     |       |     |          |      |       |        |       |     |       |         |       |     |       |          |       |     |       |        |       |     |       |         |       |      |       |        |       |      |       |        |          |      |         |       |       |      |       |               |             |  |  |  |   |        |        |    |   |        |        |   |   |      |        |   |                      |  |  |  |                               |  |  |  |                        |  |  |  |                                      |  |  |  |               |  |  |  |                   |  |  |  |               |  |  |  |                                                  |  |  |  |                                   |  |  |  |                    |  |  |  |           |  |  |  |           |  |  |  |            |  |  |  |                                                                                                                                                                                                                                                                                                                                                                                                                                                                                                                                                                              |           |           |        |           |            |            |           |              |             |            |                                                  |                                           |                 |                                                  |                          |
| filbas= '/home/stu11733/.lcmmodel/basis-sets/gam                                                                                                                                                                                                                                                                                                                                                                                                                                                                                                                                                                                                                                                                                                                                                                                                                                                                                                                                                                                                                                                                                                                                                                                                                                                                                                                                                                                                                                                                                                                                                                                                                                                                                                                                                                                                                                                                                                                                                                                                                                                                                                                                                                                                                                                                                                                                                                                                                                                                                       |        |         |               |            |       |      |       |     |       |      |       |    |       |     |       |     |       |      |       |     |       |      |       |     |       |     |       |     |       |      |       |     |       |     |       |     |       |      |       |     |        |    |        |     |       |     |       |     |       |     |       |      |          |      |         |        |       |     |       |     |          |      |       |        |       |     |       |         |       |     |       |          |       |     |       |        |       |     |       |         |       |      |       |        |       |      |       |        |          |      |         |       |       |      |       |               |             |  |  |  |   |        |        |    |   |        |        |   |   |      |        |   |                      |  |  |  |                               |  |  |  |                        |  |  |  |                                      |  |  |  |               |  |  |  |                   |  |  |  |               |  |  |  |                                                  |  |  |  |                                   |  |  |  |                    |  |  |  |           |  |  |  |           |  |  |  |            |  |  |  |                                                                                                                                                                                                                                                                                                                                                                                                                                                                                                                                                                              |           |           |        |           |            |            |           |              |             |            |                                                  |                                           |                 |                                                  |                          |
| ma_press_te288_128mhz_662d.basis'                                                                                                                                                                                                                                                                                                                                                                                                                                                                                                                                                                                                                                                                                                                                                                                                                                                                                                                                                                                                                                                                                                                                                                                                                                                                                                                                                                                                                                                                                                                                                                                                                                                                                                                                                                                                                                                                                                                                                                                                                                                                                                                                                                                                                                                                                                                                                                                                                                                                                                      |        |         |               |            |       |      |       |     |       |      |       |    |       |     |       |     |       |      |       |     |       |      |       |     |       |     |       |     |       |      |       |     |       |     |       |     |       |      |       |     |        |    |        |     |       |     |       |     |       |     |       |      |          |      |         |        |       |     |       |     |          |      |       |        |       |     |       |         |       |     |       |          |       |     |       |        |       |     |       |         |       |      |       |        |       |      |       |        |          |      |         |       |       |      |       |               |             |  |  |  |   |        |        |    |   |        |        |   |   |      |        |   |                      |  |  |  |                               |  |  |  |                        |  |  |  |                                      |  |  |  |               |  |  |  |                   |  |  |  |               |  |  |  |                                                  |  |  |  |                                   |  |  |  |                    |  |  |  |           |  |  |  |           |  |  |  |            |  |  |  |                                                                                                                                                                                                                                                                                                                                                                                                                                                                                                                                                                              |           |           |        |           |            |            |           |              |             |            |                                                  |                                           |                 |                                                  |                          |
| hzpppm= 1.2776e+02                                                                                                                                                                                                                                                                                                                                                                                                                                                                                                                                                                                                                                                                                                                                                                                                                                                                                                                                                                                                                                                                                                                                                                                                                                                                                                                                                                                                                                                                                                                                                                                                                                                                                                                                                                                                                                                                                                                                                                                                                                                                                                                                                                                                                                                                                                                                                                                                                                                                                                                     |        |         |               |            |       |      |       |     |       |      |       |    |       |     |       |     |       |      |       |     |       |      |       |     |       |     |       |     |       |      |       |     |       |     |       |     |       |      |       |     |        |    |        |     |       |     |       |     |       |     |       |      |          |      |         |        |       |     |       |     |          |      |       |        |       |     |       |         |       |     |       |          |       |     |       |        |       |     |       |         |       |      |       |        |       |      |       |        |          |      |         |       |       |      |       |               |             |  |  |  |   |        |        |    |   |        |        |   |   |      |        |   |                      |  |  |  |                               |  |  |  |                        |  |  |  |                                      |  |  |  |               |  |  |  |                   |  |  |  |               |  |  |  |                                                  |  |  |  |                                   |  |  |  |                    |  |  |  |           |  |  |  |           |  |  |  |            |  |  |  |                                                                                                                                                                                                                                                                                                                                                                                                                                                                                                                                                                              |           |           |        |           |            |            |           |              |             |            |                                                  |                                           |                 |                                                  |                          |
| icolen= 7                                                                                                                                                                                                                                                                                                                                                                                                                                                                                                                                                                                                                                                                                                                                                                                                                                                                                                                                                                                                                                                                                                                                                                                                                                                                                                                                                                                                                                                                                                                                                                                                                                                                                                                                                                                                                                                                                                                                                                                                                                                                                                                                                                                                                                                                                                                                                                                                                                                                                                                              |        |         |               |            |       |      |       |     |       |      |       |    |       |     |       |     |       |      |       |     |       |      |       |     |       |     |       |     |       |      |       |     |       |     |       |     |       |      |       |     |        |    |        |     |       |     |       |     |       |     |       |      |          |      |         |        |       |     |       |     |          |      |       |        |       |     |       |         |       |     |       |          |       |     |       |        |       |     |       |         |       |      |       |        |       |      |       |        |          |      |         |       |       |      |       |               |             |  |  |  |   |        |        |    |   |        |        |   |   |      |        |   |                      |  |  |  |                               |  |  |  |                        |  |  |  |                                      |  |  |  |               |  |  |  |                   |  |  |  |               |  |  |  |                                                  |  |  |  |                                   |  |  |  |                    |  |  |  |           |  |  |  |           |  |  |  |            |  |  |  |                                                                                                                                                                                                                                                                                                                                                                                                                                                                                                                                                                              |           |           |        |           |            |            |           |              |             |            |                                                  |                                           |                 |                                                  |                          |
| icolst= 3                                                                                                                                                                                                                                                                                                                                                                                                                                                                                                                                                                                                                                                                                                                                                                                                                                                                                                                                                                                                                                                                                                                                                                                                                                                                                                                                                                                                                                                                                                                                                                                                                                                                                                                                                                                                                                                                                                                                                                                                                                                                                                                                                                                                                                                                                                                                                                                                                                                                                                                              |        |         |               |            |       |      |       |     |       |      |       |    |       |     |       |     |       |      |       |     |       |      |       |     |       |     |       |     |       |      |       |     |       |     |       |     |       |      |       |     |        |    |        |     |       |     |       |     |       |     |       |      |          |      |         |        |       |     |       |     |          |      |       |        |       |     |       |         |       |     |       |          |       |     |       |        |       |     |       |         |       |      |       |        |       |      |       |        |          |      |         |       |       |      |       |               |             |  |  |  |   |        |        |    |   |        |        |   |   |      |        |   |                      |  |  |  |                               |  |  |  |                        |  |  |  |                                      |  |  |  |               |  |  |  |                   |  |  |  |               |  |  |  |                                                  |  |  |  |                                   |  |  |  |                    |  |  |  |           |  |  |  |           |  |  |  |            |  |  |  |                                                                                                                                                                                                                                                                                                                                                                                                                                                                                                                                                                              |           |           |        |           |            |            |           |              |             |            |                                                  |                                           |                 |                                                  |                          |
| irowen= 15                                                                                                                                                                                                                                                                                                                                                                                                                                                                                                                                                                                                                                                                                                                                                                                                                                                                                                                                                                                                                                                                                                                                                                                                                                                                                                                                                                                                                                                                                                                                                                                                                                                                                                                                                                                                                                                                                                                                                                                                                                                                                                                                                                                                                                                                                                                                                                                                                                                                                                                             |        |         |               |            |       |      |       |     |       |      |       |    |       |     |       |     |       |      |       |     |       |      |       |     |       |     |       |     |       |      |       |     |       |     |       |     |       |      |       |     |        |    |        |     |       |     |       |     |       |     |       |      |          |      |         |        |       |     |       |     |          |      |       |        |       |     |       |         |       |     |       |          |       |     |       |        |       |     |       |         |       |      |       |        |       |      |       |        |          |      |         |       |       |      |       |               |             |  |  |  |   |        |        |    |   |        |        |   |   |      |        |   |                      |  |  |  |                               |  |  |  |                        |  |  |  |                                      |  |  |  |               |  |  |  |                   |  |  |  |               |  |  |  |                                                  |  |  |  |                                   |  |  |  |                    |  |  |  |           |  |  |  |           |  |  |  |            |  |  |  |                                                                                                                                                                                                                                                                                                                                                                                                                                                                                                                                                                              |           |           |        |           |            |            |           |              |             |            |                                                  |                                           |                 |                                                  |                          |
| irowst= 6                                                                                                                                                                                                                                                                                                                                                                                                                                                                                                                                                                                                                                                                                                                                                                                                                                                                                                                                                                                                                                                                                                                                                                                                                                                                                                                                                                                                                                                                                                                                                                                                                                                                                                                                                                                                                                                                                                                                                                                                                                                                                                                                                                                                                                                                                                                                                                                                                                                                                                                              |        |         |               |            |       |      |       |     |       |      |       |    |       |     |       |     |       |      |       |     |       |      |       |     |       |     |       |     |       |      |       |     |       |     |       |     |       |      |       |     |        |    |        |     |       |     |       |     |       |     |       |      |          |      |         |        |       |     |       |     |          |      |       |        |       |     |       |         |       |     |       |          |       |     |       |        |       |     |       |         |       |      |       |        |       |      |       |        |          |      |         |       |       |      |       |               |             |  |  |  |   |        |        |    |   |        |        |   |   |      |        |   |                      |  |  |  |                               |  |  |  |                        |  |  |  |                                      |  |  |  |               |  |  |  |                   |  |  |  |               |  |  |  |                                                  |  |  |  |                                   |  |  |  |                    |  |  |  |           |  |  |  |           |  |  |  |            |  |  |  |                                                                                                                                                                                                                                                                                                                                                                                                                                                                                                                                                                              |           |           |        |           |            |            |           |              |             |            |                                                  |                                           |                 |                                                  |                          |
| islice= 1                                                                                                                                                                                                                                                                                                                                                                                                                                                                                                                                                                                                                                                                                                                                                                                                                                                                                                                                                                                                                                                                                                                                                                                                                                                                                                                                                                                                                                                                                                                                                                                                                                                                                                                                                                                                                                                                                                                                                                                                                                                                                                                                                                                                                                                                                                                                                                                                                                                                                                                              |        |         |               |            |       |      |       |     |       |      |       |    |       |     |       |     |       |      |       |     |       |      |       |     |       |     |       |     |       |      |       |     |       |     |       |     |       |      |       |     |        |    |        |     |       |     |       |     |       |     |       |      |          |      |         |        |       |     |       |     |          |      |       |        |       |     |       |         |       |     |       |          |       |     |       |        |       |     |       |         |       |      |       |        |       |      |       |        |          |      |         |       |       |      |       |               |             |  |  |  |   |        |        |    |   |        |        |   |   |      |        |   |                      |  |  |  |                               |  |  |  |                        |  |  |  |                                      |  |  |  |               |  |  |  |                   |  |  |  |               |  |  |  |                                                  |  |  |  |                                   |  |  |  |                    |  |  |  |           |  |  |  |           |  |  |  |            |  |  |  |                                                                                                                                                                                                                                                                                                                                                                                                                                                                                                                                                                              |           |           |        |           |            |            |           |              |             |            |                                                  |                                           |                 |                                                  |                          |
| lps= 8                                                                                                                                                                                                                                                                                                                                                                                                                                                                                                                                                                                                                                                                                                                                                                                                                                                                                                                                                                                                                                                                                                                                                                                                                                                                                                                                                                                                                                                                                                                                                                                                                                                                                                                                                                                                                                                                                                                                                                                                                                                                                                                                                                                                                                                                                                                                                                                                                                                                                                                                 |        |         |               |            |       |      |       |     |       |      |       |    |       |     |       |     |       |      |       |     |       |      |       |     |       |     |       |     |       |      |       |     |       |     |       |     |       |      |       |     |        |    |        |     |       |     |       |     |       |     |       |      |          |      |         |        |       |     |       |     |          |      |       |        |       |     |       |         |       |     |       |          |       |     |       |        |       |     |       |         |       |      |       |        |       |      |       |        |          |      |         |       |       |      |       |               |             |  |  |  |   |        |        |    |   |        |        |   |   |      |        |   |                      |  |  |  |                               |  |  |  |                        |  |  |  |                                      |  |  |  |               |  |  |  |                   |  |  |  |               |  |  |  |                                                  |  |  |  |                                   |  |  |  |                    |  |  |  |           |  |  |  |           |  |  |  |            |  |  |  |                                                                                                                                                                                                                                                                                                                                                                                                                                                                                                                                                                              |           |           |        |           |            |            |           |              |             |            |                                                  |                                           |                 |                                                  |                          |
| ltable= 7                                                                                                                                                                                                                                                                                                                                                                                                                                                                                                                                                                                                                                                                                                                                                                                                                                                                                                                                                                                                                                                                                                                                                                                                                                                                                                                                                                                                                                                                                                                                                                                                                                                                                                                                                                                                                                                                                                                                                                                                                                                                                                                                                                                                                                                                                                                                                                                                                                                                                                                              |        |         |               |            |       |      |       |     |       |      |       |    |       |     |       |     |       |      |       |     |       |      |       |     |       |     |       |     |       |      |       |     |       |     |       |     |       |      |       |     |        |    |        |     |       |     |       |     |       |     |       |      |          |      |         |        |       |     |       |     |          |      |       |        |       |     |       |         |       |     |       |          |       |     |       |        |       |     |       |         |       |      |       |        |       |      |       |        |          |      |         |       |       |      |       |               |             |  |  |  |   |        |        |    |   |        |        |   |   |      |        |   |                      |  |  |  |                               |  |  |  |                        |  |  |  |                                      |  |  |  |               |  |  |  |                   |  |  |  |               |  |  |  |                                                  |  |  |  |                                   |  |  |  |                    |  |  |  |           |  |  |  |           |  |  |  |            |  |  |  |                                                                                                                                                                                                                                                                                                                                                                                                                                                                                                                                                                              |           |           |        |           |            |            |           |              |             |            |                                                  |                                           |                 |                                                  |                          |
| ndcols= 16                                                                                                                                                                                                                                                                                                                                                                                                                                                                                                                                                                                                                                                                                                                                                                                                                                                                                                                                                                                                                                                                                                                                                                                                                                                                                                                                                                                                                                                                                                                                                                                                                                                                                                                                                                                                                                                                                                                                                                                                                                                                                                                                                                                                                                                                                                                                                                                                                                                                                                                             |        |         |               |            |       |      |       |     |       |      |       |    |       |     |       |     |       |      |       |     |       |      |       |     |       |     |       |     |       |      |       |     |       |     |       |     |       |      |       |     |        |    |        |     |       |     |       |     |       |     |       |      |          |      |         |        |       |     |       |     |          |      |       |        |       |     |       |         |       |     |       |          |       |     |       |        |       |     |       |         |       |      |       |        |       |      |       |        |          |      |         |       |       |      |       |               |             |  |  |  |   |        |        |    |   |        |        |   |   |      |        |   |                      |  |  |  |                               |  |  |  |                        |  |  |  |                                      |  |  |  |               |  |  |  |                   |  |  |  |               |  |  |  |                                                  |  |  |  |                                   |  |  |  |                    |  |  |  |           |  |  |  |           |  |  |  |            |  |  |  |                                                                                                                                                                                                                                                                                                                                                                                                                                                                                                                                                                              |           |           |        |           |            |            |           |              |             |            |                                                  |                                           |                 |                                                  |                          |
| ndrows= 20                                                                                                                                                                                                                                                                                                                                                                                                                                                                                                                                                                                                                                                                                                                                                                                                                                                                                                                                                                                                                                                                                                                                                                                                                                                                                                                                                                                                                                                                                                                                                                                                                                                                                                                                                                                                                                                                                                                                                                                                                                                                                                                                                                                                                                                                                                                                                                                                                                                                                                                             |        |         |               |            |       |      |       |     |       |      |       |    |       |     |       |     |       |      |       |     |       |      |       |     |       |     |       |     |       |      |       |     |       |     |       |     |       |      |       |     |        |    |        |     |       |     |       |     |       |     |       |      |          |      |         |        |       |     |       |     |          |      |       |        |       |     |       |         |       |     |       |          |       |     |       |        |       |     |       |         |       |      |       |        |       |      |       |        |          |      |         |       |       |      |       |               |             |  |  |  |   |        |        |    |   |        |        |   |   |      |        |   |                      |  |  |  |                               |  |  |  |                        |  |  |  |                                      |  |  |  |               |  |  |  |                   |  |  |  |               |  |  |  |                                                  |  |  |  |                                   |  |  |  |                    |  |  |  |           |  |  |  |           |  |  |  |            |  |  |  |                                                                                                                                                                                                                                                                                                                                                                                                                                                                                                                                                                              |           |           |        |           |            |            |           |              |             |            |                                                  |                                           |                 |                                                  |                          |
| ndslic= 1                                                                                                                                                                                                                                                                                                                                                                                                                                                                                                                                                                                                                                                                                                                                                                                                                                                                                                                                                                                                                                                                                                                                                                                                                                                                                                                                                                                                                                                                                                                                                                                                                                                                                                                                                                                                                                                                                                                                                                                                                                                                                                                                                                                                                                                                                                                                                                                                                                                                                                                              |        |         |               |            |       |      |       |     |       |      |       |    |       |     |       |     |       |      |       |     |       |      |       |     |       |     |       |     |       |      |       |     |       |     |       |     |       |      |       |     |        |    |        |     |       |     |       |     |       |     |       |      |          |      |         |        |       |     |       |     |          |      |       |        |       |     |       |         |       |     |       |          |       |     |       |        |       |     |       |         |       |      |       |        |       |      |       |        |          |      |         |       |       |      |       |               |             |  |  |  |   |        |        |    |   |        |        |   |   |      |        |   |                      |  |  |  |                               |  |  |  |                        |  |  |  |                                      |  |  |  |               |  |  |  |                   |  |  |  |               |  |  |  |                                                  |  |  |  |                                   |  |  |  |                    |  |  |  |           |  |  |  |           |  |  |  |            |  |  |  |                                                                                                                                                                                                                                                                                                                                                                                                                                                                                                                                                                              |           |           |        |           |            |            |           |              |             |            |                                                  |                                           |                 |                                                  |                          |
| nunfil= 1024                                                                                                                                                                                                                                                                                                                                                                                                                                                                                                                                                                                                                                                                                                                                                                                                                                                                                                                                                                                                                                                                                                                                                                                                                                                                                                                                                                                                                                                                                                                                                                                                                                                                                                                                                                                                                                                                                                                                                                                                                                                                                                                                                                                                                                                                                                                                                                                                                                                                                                                           |        |         |               |            |       |      |       |     |       |      |       |    |       |     |       |     |       |      |       |     |       |      |       |     |       |     |       |     |       |      |       |     |       |     |       |     |       |      |       |     |        |    |        |     |       |     |       |     |       |     |       |      |          |      |         |        |       |     |       |     |          |      |       |        |       |     |       |         |       |     |       |          |       |     |       |        |       |     |       |         |       |      |       |        |       |      |       |        |          |      |         |       |       |      |       |               |             |  |  |  |   |        |        |    |   |        |        |   |   |      |        |   |                      |  |  |  |                               |  |  |  |                        |  |  |  |                                      |  |  |  |               |  |  |  |                   |  |  |  |               |  |  |  |                                                  |  |  |  |                                   |  |  |  |                    |  |  |  |           |  |  |  |           |  |  |  |            |  |  |  |                                                                                                                                                                                                                                                                                                                                                                                                                                                                                                                                                                              |           |           |        |           |            |            |           |              |             |            |                                                  |                                           |                 |                                                  |                          |
| ppmend= 1.0                                                                                                                                                                                                                                                                                                                                                                                                                                                                                                                                                                                                                                                                                                                                                                                                                                                                                                                                                                                                                                                                                                                                                                                                                                                                                                                                                                                                                                                                                                                                                                                                                                                                                                                                                                                                                                                                                                                                                                                                                                                                                                                                                                                                                                                                                                                                                                                                                                                                                                                            |        |         |               |            |       |      |       |     |       |      |       |    |       |     |       |     |       |      |       |     |       |      |       |     |       |     |       |     |       |      |       |     |       |     |       |     |       |      |       |     |        |    |        |     |       |     |       |     |       |     |       |      |          |      |         |        |       |     |       |     |          |      |       |        |       |     |       |         |       |     |       |          |       |     |       |        |       |     |       |         |       |      |       |        |       |      |       |        |          |      |         |       |       |      |       |               |             |  |  |  |   |        |        |    |   |        |        |   |   |      |        |   |                      |  |  |  |                               |  |  |  |                        |  |  |  |                                      |  |  |  |               |  |  |  |                   |  |  |  |               |  |  |  |                                                  |  |  |  |                                   |  |  |  |                    |  |  |  |           |  |  |  |           |  |  |  |            |  |  |  |                                                                                                                                                                                                                                                                                                                                                                                                                                                                                                                                                                              |           |           |        |           |            |            |           |              |             |            |                                                  |                                           |                 |                                                  |                          |
| ppmst= 4.0                                                                                                                                                                                                                                                                                                                                                                                                                                                                                                                                                                                                                                                                                                                                                                                                                                                                                                                                                                                                                                                                                                                                                                                                                                                                                                                                                                                                                                                                                                                                                                                                                                                                                                                                                                                                                                                                                                                                                                                                                                                                                                                                                                                                                                                                                                                                                                                                                                                                                                                             |        |         |               |            |       |      |       |     |       |      |       |    |       |     |       |     |       |      |       |     |       |      |       |     |       |     |       |     |       |      |       |     |       |     |       |     |       |      |       |     |        |    |        |     |       |     |       |     |       |     |       |      |          |      |         |        |       |     |       |     |          |      |       |        |       |     |       |         |       |     |       |          |       |     |       |        |       |     |       |         |       |      |       |        |       |      |       |        |          |      |         |       |       |      |       |               |             |  |  |  |   |        |        |    |   |        |        |   |   |      |        |   |                      |  |  |  |                               |  |  |  |                        |  |  |  |                                      |  |  |  |               |  |  |  |                   |  |  |  |               |  |  |  |                                                  |  |  |  |                                   |  |  |  |                    |  |  |  |           |  |  |  |           |  |  |  |            |  |  |  |                                                                                                                                                                                                                                                                                                                                                                                                                                                                                                                                                                              |           |           |        |           |            |            |           |              |             |            |                                                  |                                           |                 |                                                  |                          |
| savdir= '/home/stu11733/.lcmmodel/saved/MR_Spekt                                                                                                                                                                                                                                                                                                                                                                                                                                                                                                                                                                                                                                                                                                                                                                                                                                                                                                                                                                                                                                                                                                                                                                                                                                                                                                                                                                                                                                                                                                                                                                                                                                                                                                                                                                                                                                                                                                                                                                                                                                                                                                                                                                                                                                                                                                                                                                                                                                                                                       |        |         |               |            |       |      |       |     |       |      |       |    |       |     |       |     |       |      |       |     |       |      |       |     |       |     |       |     |       |      |       |     |       |     |       |     |       |      |       |     |        |    |        |     |       |     |       |     |       |     |       |      |          |      |         |        |       |     |       |     |          |      |       |        |       |     |       |         |       |     |       |          |       |     |       |        |       |     |       |         |       |      |       |        |       |      |       |        |          |      |         |       |       |      |       |               |             |  |  |  |   |        |        |    |   |        |        |   |   |      |        |   |                      |  |  |  |                               |  |  |  |                        |  |  |  |                                      |  |  |  |               |  |  |  |                   |  |  |  |               |  |  |  |                                                  |  |  |  |                                   |  |  |  |                    |  |  |  |           |  |  |  |           |  |  |  |            |  |  |  |                                                                                                                                                                                                                                                                                                                                                                                                                                                                                                                                                                              |           |           |        |           |            |            |           |              |             |            |                                                  |                                           |                 |                                                  |                          |
| roskopie/s04/2019.08.27_10:25:40      '/'                                                                                                                                                                                                                                                                                                                                                                                                                                                                                                                                                                                                                                                                                                                                                                                                                                                                                                                                                                                                                                                                                                                                                                                                                                                                                                                                                                                                                                                                                                                                                                                                                                                                                                                                                                                                                                                                                                                                                                                                                                                                                                                                                                                                                                                                                                                                                                                                                                                                                              |        |         |               |            |       |      |       |     |       |      |       |    |       |     |       |     |       |      |       |     |       |      |       |     |       |     |       |     |       |      |       |     |       |     |       |     |       |      |       |     |        |    |        |     |       |     |       |     |       |     |       |      |          |      |         |        |       |     |       |     |          |      |       |        |       |     |       |         |       |     |       |          |       |     |       |        |       |     |       |         |       |      |       |        |       |      |       |        |          |      |         |       |       |      |       |               |             |  |  |  |   |        |        |    |   |        |        |   |   |      |        |   |                      |  |  |  |                               |  |  |  |                        |  |  |  |                                      |  |  |  |               |  |  |  |                   |  |  |  |               |  |  |  |                                                  |  |  |  |                                   |  |  |  |                    |  |  |  |           |  |  |  |           |  |  |  |            |  |  |  |                                                                                                                                                                                                                                                                                                                                                                                                                                                                                                                                                                              |           |           |        |           |            |            |           |              |             |            |                                                  |                                           |                 |                                                  |                          |
| sptype= 'tumor'                                                                                                                                                                                                                                                                                                                                                                                                                                                                                                                                                                                                                                                                                                                                                                                                                                                                                                                                                                                                                                                                                                                                                                                                                                                                                                                                                                                                                                                                                                                                                                                                                                                                                                                                                                                                                                                                                                                                                                                                                                                                                                                                                                                                                                                                                                                                                                                                                                                                                                                        |        |         |               |            |       |      |       |     |       |      |       |    |       |     |       |     |       |      |       |     |       |      |       |     |       |     |       |     |       |      |       |     |       |     |       |     |       |      |       |     |        |    |        |     |       |     |       |     |       |     |       |      |          |      |         |        |       |     |       |     |          |      |       |        |       |     |       |         |       |     |       |          |       |     |       |        |       |     |       |         |       |      |       |        |       |      |       |        |          |      |         |       |       |      |       |               |             |  |  |  |   |        |        |    |   |        |        |   |   |      |        |   |                      |  |  |  |                               |  |  |  |                        |  |  |  |                                      |  |  |  |               |  |  |  |                   |  |  |  |               |  |  |  |                                                  |  |  |  |                                   |  |  |  |                    |  |  |  |           |  |  |  |           |  |  |  |            |  |  |  |                                                                                                                                                                                                                                                                                                                                                                                                                                                                                                                                                                              |           |           |        |           |            |            |           |              |             |            |                                                  |                                           |                 |                                                  |                          |
| srcraw= '/home/data/Studies/GBM_Spektro/data/s04                                                                                                                                                                                                                                                                                                                                                                                                                                                                                                                                                                                                                                                                                                                                                                                                                                                                                                                                                                                                                                                                                                                                                                                                                                                                                                                                                                                                                                                                                                                                                                                                                                                                                                                                                                                                                                                                                                                                                                                                                                                                                                                                                                                                                                                                                                                                                                                                                                                                                       |        |         |               |            |       |      |       |     |       |      |       |    |       |     |       |     |       |      |       |     |       |      |       |     |       |     |       |     |       |      |       |     |       |     |       |     |       |      |       |     |        |    |        |     |       |     |       |     |       |     |       |      |          |      |         |        |       |     |       |     |          |      |       |        |       |     |       |         |       |     |       |          |       |     |       |        |       |     |       |         |       |      |       |        |       |      |       |        |          |      |         |       |       |      |       |               |             |  |  |  |   |        |        |    |   |        |        |   |   |      |        |   |                      |  |  |  |                               |  |  |  |                        |  |  |  |                                      |  |  |  |               |  |  |  |                   |  |  |  |               |  |  |  |                                                  |  |  |  |                                   |  |  |  |                    |  |  |  |           |  |  |  |           |  |  |  |            |  |  |  |                                                                                                                                                                                                                                                                                                                                                                                                                                                                                                                                                                              |           |           |        |           |            |            |           |              |             |            |                                                  |                                           |                 |                                                  |                          |
| /DBIEX_5_1_raw_act.SDAT'                                                                                                                                                                                                                                                                                                                                                                                                                                                                                                                                                                                                                                                                                                                                                                                                                                                                                                                                                                                                                                                                                                                                                                                                                                                                                                                                                                                                                                                                                                                                                                                                                                                                                                                                                                                                                                                                                                                                                                                                                                                                                                                                                                                                                                                                                                                                                                                                                                                                                                               |        |         |               |            |       |      |       |     |       |      |       |    |       |     |       |     |       |      |       |     |       |      |       |     |       |     |       |     |       |      |       |     |       |     |       |     |       |      |       |     |        |    |        |     |       |     |       |     |       |     |       |      |          |      |         |        |       |     |       |     |          |      |       |        |       |     |       |         |       |     |       |          |       |     |       |        |       |     |       |         |       |      |       |        |       |      |       |        |          |      |         |       |       |      |       |               |             |  |  |  |   |        |        |    |   |        |        |   |   |      |        |   |                      |  |  |  |                               |  |  |  |                        |  |  |  |                                      |  |  |  |               |  |  |  |                   |  |  |  |               |  |  |  |                                                  |  |  |  |                                   |  |  |  |                    |  |  |  |           |  |  |  |           |  |  |  |            |  |  |  |                                                                                                                                                                                                                                                                                                                                                                                                                                                                                                                                                                              |           |           |        |           |            |            |           |              |             |            |                                                  |                                           |                 |                                                  |                          |

# P30 - edema voxel 14;4

Row#11 Col#4 MR Spektroskopie (2019.08.27 10:25:40) Subject 04 8.00e-01 mL, TE/TR/NS=288/1500/2 (s2DSI\_TE288 TR1500)

Data of: Sektion Biomedizinische Bildgebung, Christian-Albrechts-Universitaet zu Kiel

LCModel (Version 6.3-1J) Copyright: S.W. Provencher.

Ref.: Magn. Reson. Med. 30:672-679 (1993).

28-November-2019 17:11

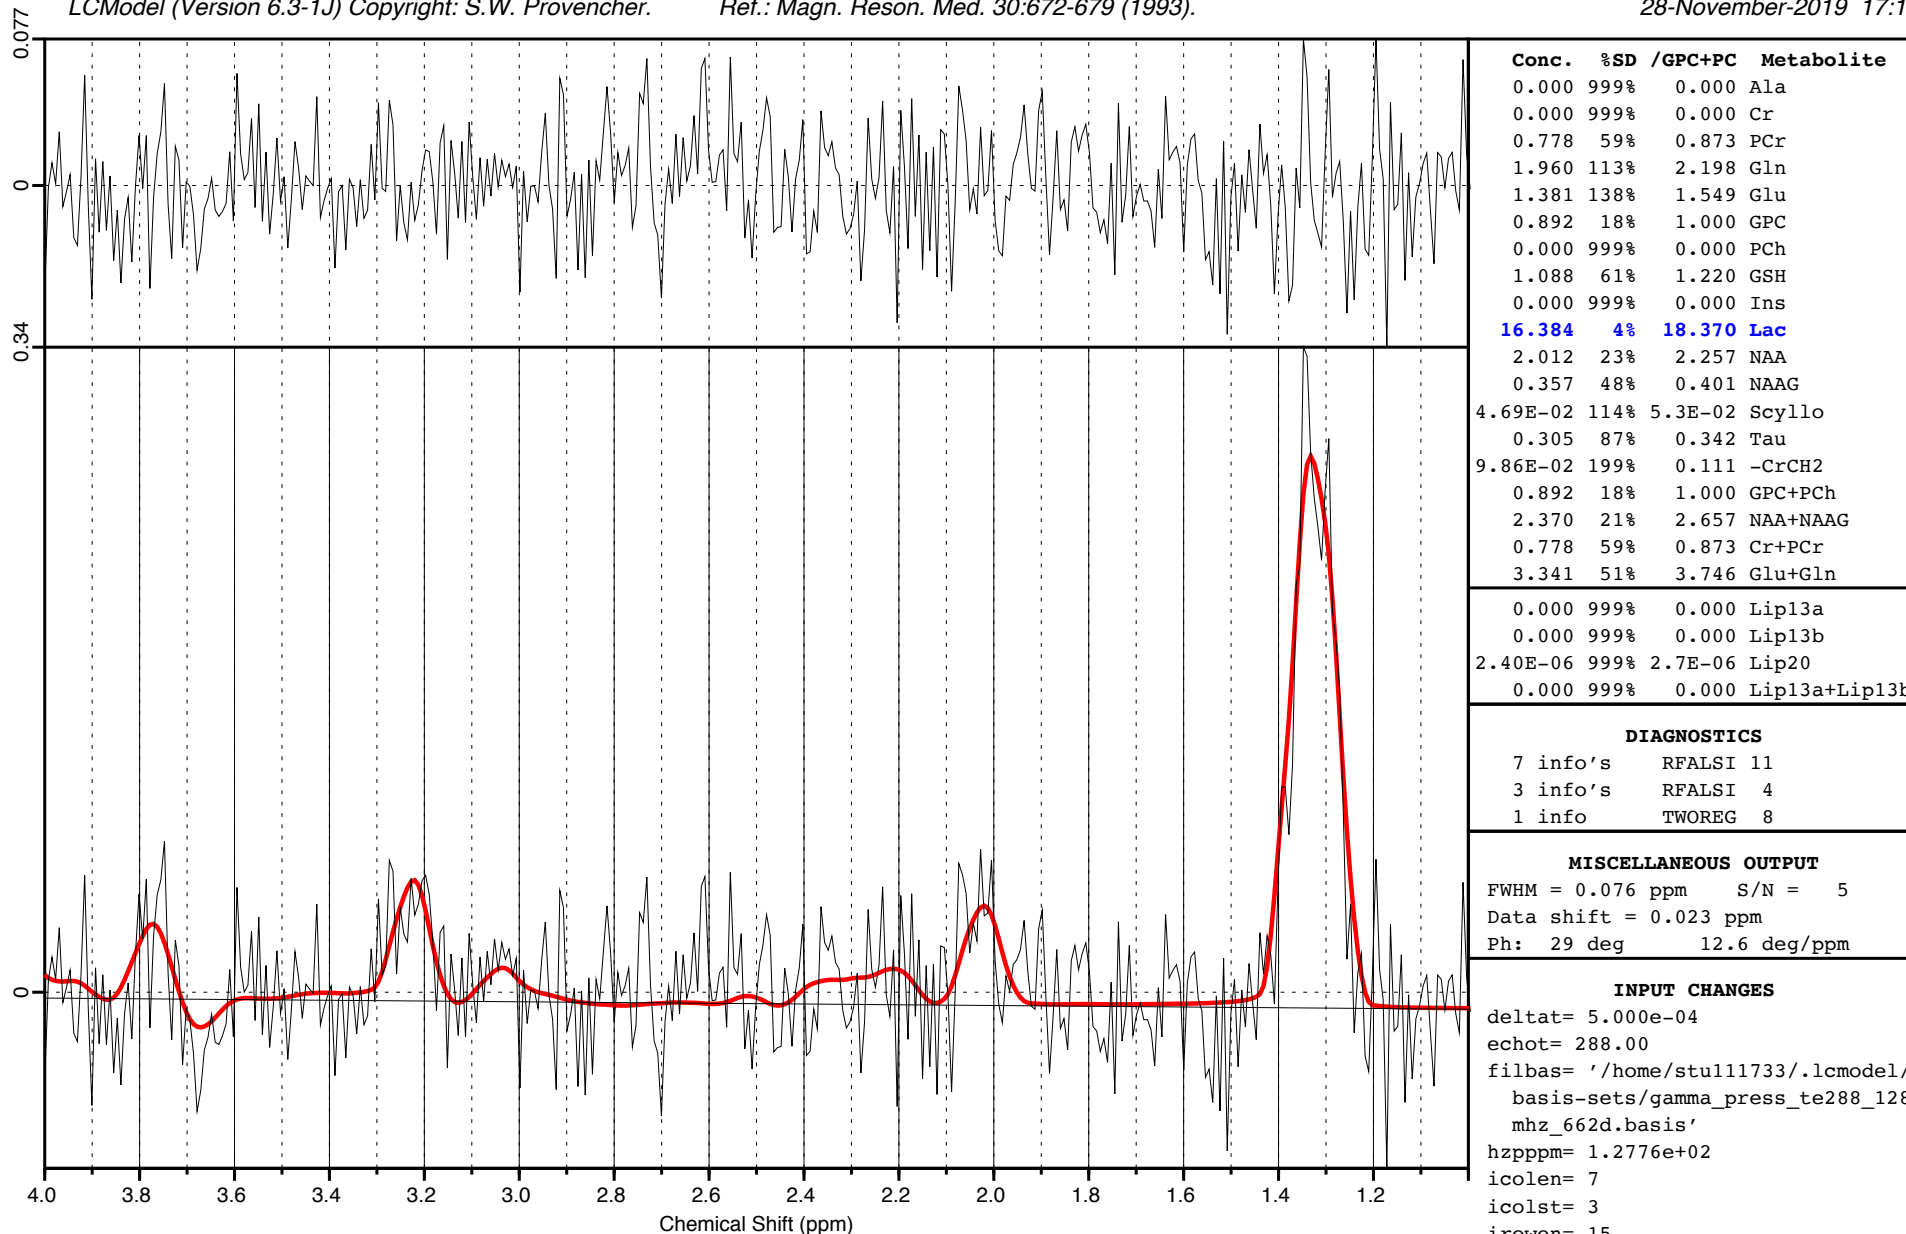

| Conc.    | %SD  | /GPC+PC | Metabolite    |
|----------|------|---------|---------------|
| 0.000    | 99%  | 0.000   | Ala           |
| 0.000    | 99%  | 0.000   | Cr            |
| 0.778    | 5%   | 0.873   | PCr           |
| 1.960    | 11%  | 2.198   | Gln           |
| 1.381    | 13%  | 1.549   | Glu           |
| 0.892    | 18%  | 1.000   | GPC           |
| 0.000    | 99%  | 0.000   | PCh           |
| 1.088    | 61%  | 1.220   | GSH           |
| 0.000    | 99%  | 0.000   | Ins           |
| 16.384   | 4%   | 18.370  | Lac           |
| 2.012    | 23%  | 2.257   | NAA           |
| 0.357    | 48%  | 0.401   | NAAG          |
| 4.69E-02 | 114% | 5.3E-02 | Scyllo        |
| 0.305    | 87%  | 0.342   | Tau           |
| 9.86E-02 | 19%  | 0.111   | -CrCH2        |
| 0.892    | 18%  | 1.000   | GPC+PCh       |
| 2.370    | 21%  | 2.657   | NAA+NAAG      |
| 0.778    | 5%   | 0.873   | Cr+PCr        |
| 3.341    | 51%  | 3.746   | Glu+Gln       |
| 0.000    | 99%  | 0.000   | Lip13a        |
| 0.000    | 99%  | 0.000   | Lip13b        |
| 2.40E-06 | 99%  | 2.7E-06 | Lip20         |
| 0.000    | 99%  | 0.000   | Lip13a+Lip13b |

## DIAGNOSTICS

|          |        |    |
|----------|--------|----|
| 7 info's | RFALSI | 11 |
| 3 info's | RFALSI | 4  |
| 1 info   | TWOREG | 8  |

## MISCELLANEOUS OUTPUT

FWHM = 0.076 ppm S/N = 5  
Data shift = 0.023 ppm  
Ph: 29 deg 12.6 deg/ppm

## INPUT CHANGES

deltat= 5.000e-04  
echot= 288.00  
filbas= '/home/stu11733/.lcmodel/  
basis-sets/gamma\_press\_te288\_128  
mhz\_662d.basis'  
hzpppm= 1.2776e+02  
icolen= 7  
icolst= 3  
irowen= 15  
irowst= 6

Row#11 Col#4 MR Spektroskopie (2019.08.27 10:25:40) Subject 04 8.00e-01 mL, TE/TR/NS=288/1500/2 (s2DSI\_TE288 TR1500)

Data of: *Sektion Biomedizinische Bildgebung, Christian-Albrechts-Universitaet zu Kiel*

LCModel (Version 6.3-1J) Copyright: S.W. Provencher.

Ref.: *Magn. Reson. Med. 30:672-679 (1993).*

28-November-2019 17:11

| <table><tr><th>Conc.</th><th>%SD</th><th>/GPC+PC</th><th>Metabolite</th></tr><tr><td>0.000</td><td>999%</td><td>0.000</td><td>Ala</td></tr><tr><td>0.000</td><td>999%</td><td>0.000</td><td>Cr</td></tr><tr><td>0.778</td><td>59%</td><td>0.873</td><td>PCr</td></tr><tr><td>1.960</td><td>113%</td><td>2.198</td><td>Gln</td></tr><tr><td>1.381</td><td>138%</td><td>1.549</td><td>Glu</td></tr><tr><td>0.892</td><td>18%</td><td>1.000</td><td>GPC</td></tr><tr><td>0.000</td><td>999%</td><td>0.000</td><td>PCh</td></tr><tr><td>1.088</td><td>61%</td><td>1.220</td><td>GSH</td></tr><tr><td>0.000</td><td>999%</td><td>0.000</td><td>Ins</td></tr><tr><td>16.384</td><td>4%</td><td>18.370</td><td>Lac</td></tr><tr><td>2.012</td><td>23%</td><td>2.257</td><td>NAA</td></tr><tr><td>0.357</td><td>48%</td><td>0.401</td><td>NAAG</td></tr><tr><td>4.69E-02</td><td>114%</td><td>5.3E-02</td><td>Scyllo</td></tr><tr><td>0.305</td><td>87%</td><td>0.342</td><td>Tau</td></tr><tr><td>9.86E-02</td><td>199%</td><td>0.111</td><td>-CrCH2</td></tr><tr><td>0.892</td><td>18%</td><td>1.000</td><td>GPC+PCh</td></tr><tr><td>2.370</td><td>21%</td><td>2.657</td><td>NAA+NAAG</td></tr><tr><td>0.778</td><td>59%</td><td>0.873</td><td>Cr+PCr</td></tr><tr><td>3.341</td><td>51%</td><td>3.746</td><td>Glu+Gln</td></tr><tr><td>0.000</td><td>999%</td><td>0.000</td><td>Lip13a</td></tr><tr><td>0.000</td><td>999%</td><td>0.000</td><td>Lip13b</td></tr><tr><td>2.40E-06</td><td>999%</td><td>2.7E-06</td><td>Lip20</td></tr><tr><td>0.000</td><td>999%</td><td>0.000</td><td>Lip13a+Lip13b</td></tr><tr><td colspan="4">DIAGNOSTICS</td></tr><tr><td>7 info's</td><td>RFALSI</td><td>11</td><td></td></tr><tr><td>3 info's</td><td>RFALSI</td><td>4</td><td></td></tr><tr><td>1 info</td><td>TWOREG</td><td>8</td><td></td></tr><tr><td colspan="4">MISCELLANEOUS OUTPUT</td></tr><tr><td colspan="4">FWHM = 0.076 ppm      S/N = 5</td></tr><tr><td colspan="4">Data shift = 0.023 ppm</td></tr><tr><td colspan="4">Ph: 29 deg              12.6 deg/ppm</td></tr><tr><td colspan="4">INPUT CHANGES</td></tr><tr><td colspan="4">deltat= 5.000e-04</td></tr><tr><td colspan="4">echot= 288.00</td></tr><tr><td colspan="4">filbas= '/home/stu111733/.lcmodel/basis-sets/gam</td></tr><tr><td colspan="4">ma_press_te288_128mhz_662d.basis'</td></tr><tr><td colspan="4">hzpppm= 1.2776e+02</td></tr><tr><td colspan="4">icolen= 7</td></tr><tr><td colspan="4">icolst= 3</td></tr><tr><td colspan="4">irowen= 15</td></tr></table> | Conc.  | %SD     | /GPC+PC       | Metabolite | 0.000 | 999% | 0.000 | Ala | 0.000 | 999% | 0.000 | Cr | 0.778 | 59% | 0.873 | PCr | 1.960 | 113% | 2.198 | Gln | 1.381 | 138% | 1.549 | Glu | 0.892 | 18% | 1.000 | GPC | 0.000 | 999% | 0.000 | PCh | 1.088 | 61% | 1.220 | GSH | 0.000 | 999% | 0.000 | Ins | 16.384 | 4% | 18.370 | Lac | 2.012 | 23% | 2.257 | NAA | 0.357 | 48% | 0.401 | NAAG | 4.69E-02 | 114% | 5.3E-02 | Scyllo | 0.305 | 87% | 0.342 | Tau | 9.86E-02 | 199% | 0.111 | -CrCH2 | 0.892 | 18% | 1.000 | GPC+PCh | 2.370 | 21% | 2.657 | NAA+NAAG | 0.778 | 59% | 0.873 | Cr+PCr | 3.341 | 51% | 3.746 | Glu+Gln | 0.000 | 999% | 0.000 | Lip13a | 0.000 | 999% | 0.000 | Lip13b | 2.40E-06 | 999% | 2.7E-06 | Lip20 | 0.000 | 999% | 0.000 | Lip13a+Lip13b | DIAGNOSTICS |  |  |  | 7 info's | RFALSI | 11 |  | 3 info's | RFALSI | 4 |  | 1 info | TWOREG | 8 |  | MISCELLANEOUS OUTPUT |  |  |  | FWHM = 0.076 ppm      S/N = 5 |  |  |  | Data shift = 0.023 ppm |  |  |  | Ph: 29 deg              12.6 deg/ppm |  |  |  | INPUT CHANGES |  |  |  | deltat= 5.000e-04 |  |  |  | echot= 288.00 |  |  |  | filbas= '/home/stu111733/.lcmodel/basis-sets/gam |  |  |  | ma_press_te288_128mhz_662d.basis' |  |  |  | hzpppm= 1.2776e+02 |  |  |  | icolen= 7 |  |  |  | icolst= 3 |  |  |  | irowen= 15 |  |  |  | <table><tr><td>irowst= 6</td></tr><tr><td>islice= 1</td></tr><tr><td>lps= 8</td></tr><tr><td>ltable= 7</td></tr><tr><td>ndcols= 16</td></tr><tr><td>ndrows= 20</td></tr><tr><td>ndslic= 1</td></tr><tr><td>nunfil= 1024</td></tr><tr><td>ppmend= 1.0</td></tr><tr><td>ppmst= 4.0</td></tr><tr><td>savdir= '/home/stu111733/.lcmodel/saved/MR_Spekt</td></tr><tr><td>roskopie/s04/2019.08.27_10:25:40      '/'</td></tr><tr><td>sptype= 'tumor'</td></tr><tr><td>srcraw= '/home/data/Studies/GBM_Spektro/data/s04</td></tr><tr><td>/DBIEX_5_1_raw_act.SDAT'</td></tr></table> | irowst= 6 | islice= 1 | lps= 8 | ltable= 7 | ndcols= 16 | ndrows= 20 | ndslic= 1 | nunfil= 1024 | ppmend= 1.0 | ppmst= 4.0 | savdir= '/home/stu111733/.lcmodel/saved/MR_Spekt | roskopie/s04/2019.08.27_10:25:40      '/' | sptype= 'tumor' | srcraw= '/home/data/Studies/GBM_Spektro/data/s04 | /DBIEX_5_1_raw_act.SDAT' |
|-------------------------------------------------------------------------------------------------------------------------------------------------------------------------------------------------------------------------------------------------------------------------------------------------------------------------------------------------------------------------------------------------------------------------------------------------------------------------------------------------------------------------------------------------------------------------------------------------------------------------------------------------------------------------------------------------------------------------------------------------------------------------------------------------------------------------------------------------------------------------------------------------------------------------------------------------------------------------------------------------------------------------------------------------------------------------------------------------------------------------------------------------------------------------------------------------------------------------------------------------------------------------------------------------------------------------------------------------------------------------------------------------------------------------------------------------------------------------------------------------------------------------------------------------------------------------------------------------------------------------------------------------------------------------------------------------------------------------------------------------------------------------------------------------------------------------------------------------------------------------------------------------------------------------------------------------------------------------------------------------------------------------------------------------------------------------------------------------------------------------------------------------------------------------------------------------------------------------------------------------------------------------------------------------------------------------------------------------------------------------------------------------------------------------------------------------------------------------------------------------------------------------------------------|--------|---------|---------------|------------|-------|------|-------|-----|-------|------|-------|----|-------|-----|-------|-----|-------|------|-------|-----|-------|------|-------|-----|-------|-----|-------|-----|-------|------|-------|-----|-------|-----|-------|-----|-------|------|-------|-----|--------|----|--------|-----|-------|-----|-------|-----|-------|-----|-------|------|----------|------|---------|--------|-------|-----|-------|-----|----------|------|-------|--------|-------|-----|-------|---------|-------|-----|-------|----------|-------|-----|-------|--------|-------|-----|-------|---------|-------|------|-------|--------|-------|------|-------|--------|----------|------|---------|-------|-------|------|-------|---------------|-------------|--|--|--|----------|--------|----|--|----------|--------|---|--|--------|--------|---|--|----------------------|--|--|--|-------------------------------|--|--|--|------------------------|--|--|--|--------------------------------------|--|--|--|---------------|--|--|--|-------------------|--|--|--|---------------|--|--|--|--------------------------------------------------|--|--|--|-----------------------------------|--|--|--|--------------------|--|--|--|-----------|--|--|--|-----------|--|--|--|------------|--|--|--|------------------------------------------------------------------------------------------------------------------------------------------------------------------------------------------------------------------------------------------------------------------------------------------------------------------------------------------------------------------------------------------------------------------------------------------------------------------------------------------------------------------------------------------------------------------------------|-----------|-----------|--------|-----------|------------|------------|-----------|--------------|-------------|------------|--------------------------------------------------|-------------------------------------------|-----------------|--------------------------------------------------|--------------------------|
| Conc.                                                                                                                                                                                                                                                                                                                                                                                                                                                                                                                                                                                                                                                                                                                                                                                                                                                                                                                                                                                                                                                                                                                                                                                                                                                                                                                                                                                                                                                                                                                                                                                                                                                                                                                                                                                                                                                                                                                                                                                                                                                                                                                                                                                                                                                                                                                                                                                                                                                                                                                                     | %SD    | /GPC+PC | Metabolite    |            |       |      |       |     |       |      |       |    |       |     |       |     |       |      |       |     |       |      |       |     |       |     |       |     |       |      |       |     |       |     |       |     |       |      |       |     |        |    |        |     |       |     |       |     |       |     |       |      |          |      |         |        |       |     |       |     |          |      |       |        |       |     |       |         |       |     |       |          |       |     |       |        |       |     |       |         |       |      |       |        |       |      |       |        |          |      |         |       |       |      |       |               |             |  |  |  |          |        |    |  |          |        |   |  |        |        |   |  |                      |  |  |  |                               |  |  |  |                        |  |  |  |                                      |  |  |  |               |  |  |  |                   |  |  |  |               |  |  |  |                                                  |  |  |  |                                   |  |  |  |                    |  |  |  |           |  |  |  |           |  |  |  |            |  |  |  |                                                                                                                                                                                                                                                                                                                                                                                                                                                                                                                                                                              |           |           |        |           |            |            |           |              |             |            |                                                  |                                           |                 |                                                  |                          |
| 0.000                                                                                                                                                                                                                                                                                                                                                                                                                                                                                                                                                                                                                                                                                                                                                                                                                                                                                                                                                                                                                                                                                                                                                                                                                                                                                                                                                                                                                                                                                                                                                                                                                                                                                                                                                                                                                                                                                                                                                                                                                                                                                                                                                                                                                                                                                                                                                                                                                                                                                                                                     | 999%   | 0.000   | Ala           |            |       |      |       |     |       |      |       |    |       |     |       |     |       |      |       |     |       |      |       |     |       |     |       |     |       |      |       |     |       |     |       |     |       |      |       |     |        |    |        |     |       |     |       |     |       |     |       |      |          |      |         |        |       |     |       |     |          |      |       |        |       |     |       |         |       |     |       |          |       |     |       |        |       |     |       |         |       |      |       |        |       |      |       |        |          |      |         |       |       |      |       |               |             |  |  |  |          |        |    |  |          |        |   |  |        |        |   |  |                      |  |  |  |                               |  |  |  |                        |  |  |  |                                      |  |  |  |               |  |  |  |                   |  |  |  |               |  |  |  |                                                  |  |  |  |                                   |  |  |  |                    |  |  |  |           |  |  |  |           |  |  |  |            |  |  |  |                                                                                                                                                                                                                                                                                                                                                                                                                                                                                                                                                                              |           |           |        |           |            |            |           |              |             |            |                                                  |                                           |                 |                                                  |                          |
| 0.000                                                                                                                                                                                                                                                                                                                                                                                                                                                                                                                                                                                                                                                                                                                                                                                                                                                                                                                                                                                                                                                                                                                                                                                                                                                                                                                                                                                                                                                                                                                                                                                                                                                                                                                                                                                                                                                                                                                                                                                                                                                                                                                                                                                                                                                                                                                                                                                                                                                                                                                                     | 999%   | 0.000   | Cr            |            |       |      |       |     |       |      |       |    |       |     |       |     |       |      |       |     |       |      |       |     |       |     |       |     |       |      |       |     |       |     |       |     |       |      |       |     |        |    |        |     |       |     |       |     |       |     |       |      |          |      |         |        |       |     |       |     |          |      |       |        |       |     |       |         |       |     |       |          |       |     |       |        |       |     |       |         |       |      |       |        |       |      |       |        |          |      |         |       |       |      |       |               |             |  |  |  |          |        |    |  |          |        |   |  |        |        |   |  |                      |  |  |  |                               |  |  |  |                        |  |  |  |                                      |  |  |  |               |  |  |  |                   |  |  |  |               |  |  |  |                                                  |  |  |  |                                   |  |  |  |                    |  |  |  |           |  |  |  |           |  |  |  |            |  |  |  |                                                                                                                                                                                                                                                                                                                                                                                                                                                                                                                                                                              |           |           |        |           |            |            |           |              |             |            |                                                  |                                           |                 |                                                  |                          |
| 0.778                                                                                                                                                                                                                                                                                                                                                                                                                                                                                                                                                                                                                                                                                                                                                                                                                                                                                                                                                                                                                                                                                                                                                                                                                                                                                                                                                                                                                                                                                                                                                                                                                                                                                                                                                                                                                                                                                                                                                                                                                                                                                                                                                                                                                                                                                                                                                                                                                                                                                                                                     | 59%    | 0.873   | PCr           |            |       |      |       |     |       |      |       |    |       |     |       |     |       |      |       |     |       |      |       |     |       |     |       |     |       |      |       |     |       |     |       |     |       |      |       |     |        |    |        |     |       |     |       |     |       |     |       |      |          |      |         |        |       |     |       |     |          |      |       |        |       |     |       |         |       |     |       |          |       |     |       |        |       |     |       |         |       |      |       |        |       |      |       |        |          |      |         |       |       |      |       |               |             |  |  |  |          |        |    |  |          |        |   |  |        |        |   |  |                      |  |  |  |                               |  |  |  |                        |  |  |  |                                      |  |  |  |               |  |  |  |                   |  |  |  |               |  |  |  |                                                  |  |  |  |                                   |  |  |  |                    |  |  |  |           |  |  |  |           |  |  |  |            |  |  |  |                                                                                                                                                                                                                                                                                                                                                                                                                                                                                                                                                                              |           |           |        |           |            |            |           |              |             |            |                                                  |                                           |                 |                                                  |                          |
| 1.960                                                                                                                                                                                                                                                                                                                                                                                                                                                                                                                                                                                                                                                                                                                                                                                                                                                                                                                                                                                                                                                                                                                                                                                                                                                                                                                                                                                                                                                                                                                                                                                                                                                                                                                                                                                                                                                                                                                                                                                                                                                                                                                                                                                                                                                                                                                                                                                                                                                                                                                                     | 113%   | 2.198   | Gln           |            |       |      |       |     |       |      |       |    |       |     |       |     |       |      |       |     |       |      |       |     |       |     |       |     |       |      |       |     |       |     |       |     |       |      |       |     |        |    |        |     |       |     |       |     |       |     |       |      |          |      |         |        |       |     |       |     |          |      |       |        |       |     |       |         |       |     |       |          |       |     |       |        |       |     |       |         |       |      |       |        |       |      |       |        |          |      |         |       |       |      |       |               |             |  |  |  |          |        |    |  |          |        |   |  |        |        |   |  |                      |  |  |  |                               |  |  |  |                        |  |  |  |                                      |  |  |  |               |  |  |  |                   |  |  |  |               |  |  |  |                                                  |  |  |  |                                   |  |  |  |                    |  |  |  |           |  |  |  |           |  |  |  |            |  |  |  |                                                                                                                                                                                                                                                                                                                                                                                                                                                                                                                                                                              |           |           |        |           |            |            |           |              |             |            |                                                  |                                           |                 |                                                  |                          |
| 1.381                                                                                                                                                                                                                                                                                                                                                                                                                                                                                                                                                                                                                                                                                                                                                                                                                                                                                                                                                                                                                                                                                                                                                                                                                                                                                                                                                                                                                                                                                                                                                                                                                                                                                                                                                                                                                                                                                                                                                                                                                                                                                                                                                                                                                                                                                                                                                                                                                                                                                                                                     | 138%   | 1.549   | Glu           |            |       |      |       |     |       |      |       |    |       |     |       |     |       |      |       |     |       |      |       |     |       |     |       |     |       |      |       |     |       |     |       |     |       |      |       |     |        |    |        |     |       |     |       |     |       |     |       |      |          |      |         |        |       |     |       |     |          |      |       |        |       |     |       |         |       |     |       |          |       |     |       |        |       |     |       |         |       |      |       |        |       |      |       |        |          |      |         |       |       |      |       |               |             |  |  |  |          |        |    |  |          |        |   |  |        |        |   |  |                      |  |  |  |                               |  |  |  |                        |  |  |  |                                      |  |  |  |               |  |  |  |                   |  |  |  |               |  |  |  |                                                  |  |  |  |                                   |  |  |  |                    |  |  |  |           |  |  |  |           |  |  |  |            |  |  |  |                                                                                                                                                                                                                                                                                                                                                                                                                                                                                                                                                                              |           |           |        |           |            |            |           |              |             |            |                                                  |                                           |                 |                                                  |                          |
| 0.892                                                                                                                                                                                                                                                                                                                                                                                                                                                                                                                                                                                                                                                                                                                                                                                                                                                                                                                                                                                                                                                                                                                                                                                                                                                                                                                                                                                                                                                                                                                                                                                                                                                                                                                                                                                                                                                                                                                                                                                                                                                                                                                                                                                                                                                                                                                                                                                                                                                                                                                                     | 18%    | 1.000   | GPC           |            |       |      |       |     |       |      |       |    |       |     |       |     |       |      |       |     |       |      |       |     |       |     |       |     |       |      |       |     |       |     |       |     |       |      |       |     |        |    |        |     |       |     |       |     |       |     |       |      |          |      |         |        |       |     |       |     |          |      |       |        |       |     |       |         |       |     |       |          |       |     |       |        |       |     |       |         |       |      |       |        |       |      |       |        |          |      |         |       |       |      |       |               |             |  |  |  |          |        |    |  |          |        |   |  |        |        |   |  |                      |  |  |  |                               |  |  |  |                        |  |  |  |                                      |  |  |  |               |  |  |  |                   |  |  |  |               |  |  |  |                                                  |  |  |  |                                   |  |  |  |                    |  |  |  |           |  |  |  |           |  |  |  |            |  |  |  |                                                                                                                                                                                                                                                                                                                                                                                                                                                                                                                                                                              |           |           |        |           |            |            |           |              |             |            |                                                  |                                           |                 |                                                  |                          |
| 0.000                                                                                                                                                                                                                                                                                                                                                                                                                                                                                                                                                                                                                                                                                                                                                                                                                                                                                                                                                                                                                                                                                                                                                                                                                                                                                                                                                                                                                                                                                                                                                                                                                                                                                                                                                                                                                                                                                                                                                                                                                                                                                                                                                                                                                                                                                                                                                                                                                                                                                                                                     | 999%   | 0.000   | PCh           |            |       |      |       |     |       |      |       |    |       |     |       |     |       |      |       |     |       |      |       |     |       |     |       |     |       |      |       |     |       |     |       |     |       |      |       |     |        |    |        |     |       |     |       |     |       |     |       |      |          |      |         |        |       |     |       |     |          |      |       |        |       |     |       |         |       |     |       |          |       |     |       |        |       |     |       |         |       |      |       |        |       |      |       |        |          |      |         |       |       |      |       |               |             |  |  |  |          |        |    |  |          |        |   |  |        |        |   |  |                      |  |  |  |                               |  |  |  |                        |  |  |  |                                      |  |  |  |               |  |  |  |                   |  |  |  |               |  |  |  |                                                  |  |  |  |                                   |  |  |  |                    |  |  |  |           |  |  |  |           |  |  |  |            |  |  |  |                                                                                                                                                                                                                                                                                                                                                                                                                                                                                                                                                                              |           |           |        |           |            |            |           |              |             |            |                                                  |                                           |                 |                                                  |                          |
| 1.088                                                                                                                                                                                                                                                                                                                                                                                                                                                                                                                                                                                                                                                                                                                                                                                                                                                                                                                                                                                                                                                                                                                                                                                                                                                                                                                                                                                                                                                                                                                                                                                                                                                                                                                                                                                                                                                                                                                                                                                                                                                                                                                                                                                                                                                                                                                                                                                                                                                                                                                                     | 61%    | 1.220   | GSH           |            |       |      |       |     |       |      |       |    |       |     |       |     |       |      |       |     |       |      |       |     |       |     |       |     |       |      |       |     |       |     |       |     |       |      |       |     |        |    |        |     |       |     |       |     |       |     |       |      |          |      |         |        |       |     |       |     |          |      |       |        |       |     |       |         |       |     |       |          |       |     |       |        |       |     |       |         |       |      |       |        |       |      |       |        |          |      |         |       |       |      |       |               |             |  |  |  |          |        |    |  |          |        |   |  |        |        |   |  |                      |  |  |  |                               |  |  |  |                        |  |  |  |                                      |  |  |  |               |  |  |  |                   |  |  |  |               |  |  |  |                                                  |  |  |  |                                   |  |  |  |                    |  |  |  |           |  |  |  |           |  |  |  |            |  |  |  |                                                                                                                                                                                                                                                                                                                                                                                                                                                                                                                                                                              |           |           |        |           |            |            |           |              |             |            |                                                  |                                           |                 |                                                  |                          |
| 0.000                                                                                                                                                                                                                                                                                                                                                                                                                                                                                                                                                                                                                                                                                                                                                                                                                                                                                                                                                                                                                                                                                                                                                                                                                                                                                                                                                                                                                                                                                                                                                                                                                                                                                                                                                                                                                                                                                                                                                                                                                                                                                                                                                                                                                                                                                                                                                                                                                                                                                                                                     | 999%   | 0.000   | Ins           |            |       |      |       |     |       |      |       |    |       |     |       |     |       |      |       |     |       |      |       |     |       |     |       |     |       |      |       |     |       |     |       |     |       |      |       |     |        |    |        |     |       |     |       |     |       |     |       |      |          |      |         |        |       |     |       |     |          |      |       |        |       |     |       |         |       |     |       |          |       |     |       |        |       |     |       |         |       |      |       |        |       |      |       |        |          |      |         |       |       |      |       |               |             |  |  |  |          |        |    |  |          |        |   |  |        |        |   |  |                      |  |  |  |                               |  |  |  |                        |  |  |  |                                      |  |  |  |               |  |  |  |                   |  |  |  |               |  |  |  |                                                  |  |  |  |                                   |  |  |  |                    |  |  |  |           |  |  |  |           |  |  |  |            |  |  |  |                                                                                                                                                                                                                                                                                                                                                                                                                                                                                                                                                                              |           |           |        |           |            |            |           |              |             |            |                                                  |                                           |                 |                                                  |                          |
| 16.384                                                                                                                                                                                                                                                                                                                                                                                                                                                                                                                                                                                                                                                                                                                                                                                                                                                                                                                                                                                                                                                                                                                                                                                                                                                                                                                                                                                                                                                                                                                                                                                                                                                                                                                                                                                                                                                                                                                                                                                                                                                                                                                                                                                                                                                                                                                                                                                                                                                                                                                                    | 4%     | 18.370  | Lac           |            |       |      |       |     |       |      |       |    |       |     |       |     |       |      |       |     |       |      |       |     |       |     |       |     |       |      |       |     |       |     |       |     |       |      |       |     |        |    |        |     |       |     |       |     |       |     |       |      |          |      |         |        |       |     |       |     |          |      |       |        |       |     |       |         |       |     |       |          |       |     |       |        |       |     |       |         |       |      |       |        |       |      |       |        |          |      |         |       |       |      |       |               |             |  |  |  |          |        |    |  |          |        |   |  |        |        |   |  |                      |  |  |  |                               |  |  |  |                        |  |  |  |                                      |  |  |  |               |  |  |  |                   |  |  |  |               |  |  |  |                                                  |  |  |  |                                   |  |  |  |                    |  |  |  |           |  |  |  |           |  |  |  |            |  |  |  |                                                                                                                                                                                                                                                                                                                                                                                                                                                                                                                                                                              |           |           |        |           |            |            |           |              |             |            |                                                  |                                           |                 |                                                  |                          |
| 2.012                                                                                                                                                                                                                                                                                                                                                                                                                                                                                                                                                                                                                                                                                                                                                                                                                                                                                                                                                                                                                                                                                                                                                                                                                                                                                                                                                                                                                                                                                                                                                                                                                                                                                                                                                                                                                                                                                                                                                                                                                                                                                                                                                                                                                                                                                                                                                                                                                                                                                                                                     | 23%    | 2.257   | NAA           |            |       |      |       |     |       |      |       |    |       |     |       |     |       |      |       |     |       |      |       |     |       |     |       |     |       |      |       |     |       |     |       |     |       |      |       |     |        |    |        |     |       |     |       |     |       |     |       |      |          |      |         |        |       |     |       |     |          |      |       |        |       |     |       |         |       |     |       |          |       |     |       |        |       |     |       |         |       |      |       |        |       |      |       |        |          |      |         |       |       |      |       |               |             |  |  |  |          |        |    |  |          |        |   |  |        |        |   |  |                      |  |  |  |                               |  |  |  |                        |  |  |  |                                      |  |  |  |               |  |  |  |                   |  |  |  |               |  |  |  |                                                  |  |  |  |                                   |  |  |  |                    |  |  |  |           |  |  |  |           |  |  |  |            |  |  |  |                                                                                                                                                                                                                                                                                                                                                                                                                                                                                                                                                                              |           |           |        |           |            |            |           |              |             |            |                                                  |                                           |                 |                                                  |                          |
| 0.357                                                                                                                                                                                                                                                                                                                                                                                                                                                                                                                                                                                                                                                                                                                                                                                                                                                                                                                                                                                                                                                                                                                                                                                                                                                                                                                                                                                                                                                                                                                                                                                                                                                                                                                                                                                                                                                                                                                                                                                                                                                                                                                                                                                                                                                                                                                                                                                                                                                                                                                                     | 48%    | 0.401   | NAAG          |            |       |      |       |     |       |      |       |    |       |     |       |     |       |      |       |     |       |      |       |     |       |     |       |     |       |      |       |     |       |     |       |     |       |      |       |     |        |    |        |     |       |     |       |     |       |     |       |      |          |      |         |        |       |     |       |     |          |      |       |        |       |     |       |         |       |     |       |          |       |     |       |        |       |     |       |         |       |      |       |        |       |      |       |        |          |      |         |       |       |      |       |               |             |  |  |  |          |        |    |  |          |        |   |  |        |        |   |  |                      |  |  |  |                               |  |  |  |                        |  |  |  |                                      |  |  |  |               |  |  |  |                   |  |  |  |               |  |  |  |                                                  |  |  |  |                                   |  |  |  |                    |  |  |  |           |  |  |  |           |  |  |  |            |  |  |  |                                                                                                                                                                                                                                                                                                                                                                                                                                                                                                                                                                              |           |           |        |           |            |            |           |              |             |            |                                                  |                                           |                 |                                                  |                          |
| 4.69E-02                                                                                                                                                                                                                                                                                                                                                                                                                                                                                                                                                                                                                                                                                                                                                                                                                                                                                                                                                                                                                                                                                                                                                                                                                                                                                                                                                                                                                                                                                                                                                                                                                                                                                                                                                                                                                                                                                                                                                                                                                                                                                                                                                                                                                                                                                                                                                                                                                                                                                                                                  | 114%   | 5.3E-02 | Scyllo        |            |       |      |       |     |       |      |       |    |       |     |       |     |       |      |       |     |       |      |       |     |       |     |       |     |       |      |       |     |       |     |       |     |       |      |       |     |        |    |        |     |       |     |       |     |       |     |       |      |          |      |         |        |       |     |       |     |          |      |       |        |       |     |       |         |       |     |       |          |       |     |       |        |       |     |       |         |       |      |       |        |       |      |       |        |          |      |         |       |       |      |       |               |             |  |  |  |          |        |    |  |          |        |   |  |        |        |   |  |                      |  |  |  |                               |  |  |  |                        |  |  |  |                                      |  |  |  |               |  |  |  |                   |  |  |  |               |  |  |  |                                                  |  |  |  |                                   |  |  |  |                    |  |  |  |           |  |  |  |           |  |  |  |            |  |  |  |                                                                                                                                                                                                                                                                                                                                                                                                                                                                                                                                                                              |           |           |        |           |            |            |           |              |             |            |                                                  |                                           |                 |                                                  |                          |
| 0.305                                                                                                                                                                                                                                                                                                                                                                                                                                                                                                                                                                                                                                                                                                                                                                                                                                                                                                                                                                                                                                                                                                                                                                                                                                                                                                                                                                                                                                                                                                                                                                                                                                                                                                                                                                                                                                                                                                                                                                                                                                                                                                                                                                                                                                                                                                                                                                                                                                                                                                                                     | 87%    | 0.342   | Tau           |            |       |      |       |     |       |      |       |    |       |     |       |     |       |      |       |     |       |      |       |     |       |     |       |     |       |      |       |     |       |     |       |     |       |      |       |     |        |    |        |     |       |     |       |     |       |     |       |      |          |      |         |        |       |     |       |     |          |      |       |        |       |     |       |         |       |     |       |          |       |     |       |        |       |     |       |         |       |      |       |        |       |      |       |        |          |      |         |       |       |      |       |               |             |  |  |  |          |        |    |  |          |        |   |  |        |        |   |  |                      |  |  |  |                               |  |  |  |                        |  |  |  |                                      |  |  |  |               |  |  |  |                   |  |  |  |               |  |  |  |                                                  |  |  |  |                                   |  |  |  |                    |  |  |  |           |  |  |  |           |  |  |  |            |  |  |  |                                                                                                                                                                                                                                                                                                                                                                                                                                                                                                                                                                              |           |           |        |           |            |            |           |              |             |            |                                                  |                                           |                 |                                                  |                          |
| 9.86E-02                                                                                                                                                                                                                                                                                                                                                                                                                                                                                                                                                                                                                                                                                                                                                                                                                                                                                                                                                                                                                                                                                                                                                                                                                                                                                                                                                                                                                                                                                                                                                                                                                                                                                                                                                                                                                                                                                                                                                                                                                                                                                                                                                                                                                                                                                                                                                                                                                                                                                                                                  | 199%   | 0.111   | -CrCH2        |            |       |      |       |     |       |      |       |    |       |     |       |     |       |      |       |     |       |      |       |     |       |     |       |     |       |      |       |     |       |     |       |     |       |      |       |     |        |    |        |     |       |     |       |     |       |     |       |      |          |      |         |        |       |     |       |     |          |      |       |        |       |     |       |         |       |     |       |          |       |     |       |        |       |     |       |         |       |      |       |        |       |      |       |        |          |      |         |       |       |      |       |               |             |  |  |  |          |        |    |  |          |        |   |  |        |        |   |  |                      |  |  |  |                               |  |  |  |                        |  |  |  |                                      |  |  |  |               |  |  |  |                   |  |  |  |               |  |  |  |                                                  |  |  |  |                                   |  |  |  |                    |  |  |  |           |  |  |  |           |  |  |  |            |  |  |  |                                                                                                                                                                                                                                                                                                                                                                                                                                                                                                                                                                              |           |           |        |           |            |            |           |              |             |            |                                                  |                                           |                 |                                                  |                          |
| 0.892                                                                                                                                                                                                                                                                                                                                                                                                                                                                                                                                                                                                                                                                                                                                                                                                                                                                                                                                                                                                                                                                                                                                                                                                                                                                                                                                                                                                                                                                                                                                                                                                                                                                                                                                                                                                                                                                                                                                                                                                                                                                                                                                                                                                                                                                                                                                                                                                                                                                                                                                     | 18%    | 1.000   | GPC+PCh       |            |       |      |       |     |       |      |       |    |       |     |       |     |       |      |       |     |       |      |       |     |       |     |       |     |       |      |       |     |       |     |       |     |       |      |       |     |        |    |        |     |       |     |       |     |       |     |       |      |          |      |         |        |       |     |       |     |          |      |       |        |       |     |       |         |       |     |       |          |       |     |       |        |       |     |       |         |       |      |       |        |       |      |       |        |          |      |         |       |       |      |       |               |             |  |  |  |          |        |    |  |          |        |   |  |        |        |   |  |                      |  |  |  |                               |  |  |  |                        |  |  |  |                                      |  |  |  |               |  |  |  |                   |  |  |  |               |  |  |  |                                                  |  |  |  |                                   |  |  |  |                    |  |  |  |           |  |  |  |           |  |  |  |            |  |  |  |                                                                                                                                                                                                                                                                                                                                                                                                                                                                                                                                                                              |           |           |        |           |            |            |           |              |             |            |                                                  |                                           |                 |                                                  |                          |
| 2.370                                                                                                                                                                                                                                                                                                                                                                                                                                                                                                                                                                                                                                                                                                                                                                                                                                                                                                                                                                                                                                                                                                                                                                                                                                                                                                                                                                                                                                                                                                                                                                                                                                                                                                                                                                                                                                                                                                                                                                                                                                                                                                                                                                                                                                                                                                                                                                                                                                                                                                                                     | 21%    | 2.657   | NAA+NAAG      |            |       |      |       |     |       |      |       |    |       |     |       |     |       |      |       |     |       |      |       |     |       |     |       |     |       |      |       |     |       |     |       |     |       |      |       |     |        |    |        |     |       |     |       |     |       |     |       |      |          |      |         |        |       |     |       |     |          |      |       |        |       |     |       |         |       |     |       |          |       |     |       |        |       |     |       |         |       |      |       |        |       |      |       |        |          |      |         |       |       |      |       |               |             |  |  |  |          |        |    |  |          |        |   |  |        |        |   |  |                      |  |  |  |                               |  |  |  |                        |  |  |  |                                      |  |  |  |               |  |  |  |                   |  |  |  |               |  |  |  |                                                  |  |  |  |                                   |  |  |  |                    |  |  |  |           |  |  |  |           |  |  |  |            |  |  |  |                                                                                                                                                                                                                                                                                                                                                                                                                                                                                                                                                                              |           |           |        |           |            |            |           |              |             |            |                                                  |                                           |                 |                                                  |                          |
| 0.778                                                                                                                                                                                                                                                                                                                                                                                                                                                                                                                                                                                                                                                                                                                                                                                                                                                                                                                                                                                                                                                                                                                                                                                                                                                                                                                                                                                                                                                                                                                                                                                                                                                                                                                                                                                                                                                                                                                                                                                                                                                                                                                                                                                                                                                                                                                                                                                                                                                                                                                                     | 59%    | 0.873   | Cr+PCr        |            |       |      |       |     |       |      |       |    |       |     |       |     |       |      |       |     |       |      |       |     |       |     |       |     |       |      |       |     |       |     |       |     |       |      |       |     |        |    |        |     |       |     |       |     |       |     |       |      |          |      |         |        |       |     |       |     |          |      |       |        |       |     |       |         |       |     |       |          |       |     |       |        |       |     |       |         |       |      |       |        |       |      |       |        |          |      |         |       |       |      |       |               |             |  |  |  |          |        |    |  |          |        |   |  |        |        |   |  |                      |  |  |  |                               |  |  |  |                        |  |  |  |                                      |  |  |  |               |  |  |  |                   |  |  |  |               |  |  |  |                                                  |  |  |  |                                   |  |  |  |                    |  |  |  |           |  |  |  |           |  |  |  |            |  |  |  |                                                                                                                                                                                                                                                                                                                                                                                                                                                                                                                                                                              |           |           |        |           |            |            |           |              |             |            |                                                  |                                           |                 |                                                  |                          |
| 3.341                                                                                                                                                                                                                                                                                                                                                                                                                                                                                                                                                                                                                                                                                                                                                                                                                                                                                                                                                                                                                                                                                                                                                                                                                                                                                                                                                                                                                                                                                                                                                                                                                                                                                                                                                                                                                                                                                                                                                                                                                                                                                                                                                                                                                                                                                                                                                                                                                                                                                                                                     | 51%    | 3.746   | Glu+Gln       |            |       |      |       |     |       |      |       |    |       |     |       |     |       |      |       |     |       |      |       |     |       |     |       |     |       |      |       |     |       |     |       |     |       |      |       |     |        |    |        |     |       |     |       |     |       |     |       |      |          |      |         |        |       |     |       |     |          |      |       |        |       |     |       |         |       |     |       |          |       |     |       |        |       |     |       |         |       |      |       |        |       |      |       |        |          |      |         |       |       |      |       |               |             |  |  |  |          |        |    |  |          |        |   |  |        |        |   |  |                      |  |  |  |                               |  |  |  |                        |  |  |  |                                      |  |  |  |               |  |  |  |                   |  |  |  |               |  |  |  |                                                  |  |  |  |                                   |  |  |  |                    |  |  |  |           |  |  |  |           |  |  |  |            |  |  |  |                                                                                                                                                                                                                                                                                                                                                                                                                                                                                                                                                                              |           |           |        |           |            |            |           |              |             |            |                                                  |                                           |                 |                                                  |                          |
| 0.000                                                                                                                                                                                                                                                                                                                                                                                                                                                                                                                                                                                                                                                                                                                                                                                                                                                                                                                                                                                                                                                                                                                                                                                                                                                                                                                                                                                                                                                                                                                                                                                                                                                                                                                                                                                                                                                                                                                                                                                                                                                                                                                                                                                                                                                                                                                                                                                                                                                                                                                                     | 999%   | 0.000   | Lip13a        |            |       |      |       |     |       |      |       |    |       |     |       |     |       |      |       |     |       |      |       |     |       |     |       |     |       |      |       |     |       |     |       |     |       |      |       |     |        |    |        |     |       |     |       |     |       |     |       |      |          |      |         |        |       |     |       |     |          |      |       |        |       |     |       |         |       |     |       |          |       |     |       |        |       |     |       |         |       |      |       |        |       |      |       |        |          |      |         |       |       |      |       |               |             |  |  |  |          |        |    |  |          |        |   |  |        |        |   |  |                      |  |  |  |                               |  |  |  |                        |  |  |  |                                      |  |  |  |               |  |  |  |                   |  |  |  |               |  |  |  |                                                  |  |  |  |                                   |  |  |  |                    |  |  |  |           |  |  |  |           |  |  |  |            |  |  |  |                                                                                                                                                                                                                                                                                                                                                                                                                                                                                                                                                                              |           |           |        |           |            |            |           |              |             |            |                                                  |                                           |                 |                                                  |                          |
| 0.000                                                                                                                                                                                                                                                                                                                                                                                                                                                                                                                                                                                                                                                                                                                                                                                                                                                                                                                                                                                                                                                                                                                                                                                                                                                                                                                                                                                                                                                                                                                                                                                                                                                                                                                                                                                                                                                                                                                                                                                                                                                                                                                                                                                                                                                                                                                                                                                                                                                                                                                                     | 999%   | 0.000   | Lip13b        |            |       |      |       |     |       |      |       |    |       |     |       |     |       |      |       |     |       |      |       |     |       |     |       |     |       |      |       |     |       |     |       |     |       |      |       |     |        |    |        |     |       |     |       |     |       |     |       |      |          |      |         |        |       |     |       |     |          |      |       |        |       |     |       |         |       |     |       |          |       |     |       |        |       |     |       |         |       |      |       |        |       |      |       |        |          |      |         |       |       |      |       |               |             |  |  |  |          |        |    |  |          |        |   |  |        |        |   |  |                      |  |  |  |                               |  |  |  |                        |  |  |  |                                      |  |  |  |               |  |  |  |                   |  |  |  |               |  |  |  |                                                  |  |  |  |                                   |  |  |  |                    |  |  |  |           |  |  |  |           |  |  |  |            |  |  |  |                                                                                                                                                                                                                                                                                                                                                                                                                                                                                                                                                                              |           |           |        |           |            |            |           |              |             |            |                                                  |                                           |                 |                                                  |                          |
| 2.40E-06                                                                                                                                                                                                                                                                                                                                                                                                                                                                                                                                                                                                                                                                                                                                                                                                                                                                                                                                                                                                                                                                                                                                                                                                                                                                                                                                                                                                                                                                                                                                                                                                                                                                                                                                                                                                                                                                                                                                                                                                                                                                                                                                                                                                                                                                                                                                                                                                                                                                                                                                  | 999%   | 2.7E-06 | Lip20         |            |       |      |       |     |       |      |       |    |       |     |       |     |       |      |       |     |       |      |       |     |       |     |       |     |       |      |       |     |       |     |       |     |       |      |       |     |        |    |        |     |       |     |       |     |       |     |       |      |          |      |         |        |       |     |       |     |          |      |       |        |       |     |       |         |       |     |       |          |       |     |       |        |       |     |       |         |       |      |       |        |       |      |       |        |          |      |         |       |       |      |       |               |             |  |  |  |          |        |    |  |          |        |   |  |        |        |   |  |                      |  |  |  |                               |  |  |  |                        |  |  |  |                                      |  |  |  |               |  |  |  |                   |  |  |  |               |  |  |  |                                                  |  |  |  |                                   |  |  |  |                    |  |  |  |           |  |  |  |           |  |  |  |            |  |  |  |                                                                                                                                                                                                                                                                                                                                                                                                                                                                                                                                                                              |           |           |        |           |            |            |           |              |             |            |                                                  |                                           |                 |                                                  |                          |
| 0.000                                                                                                                                                                                                                                                                                                                                                                                                                                                                                                                                                                                                                                                                                                                                                                                                                                                                                                                                                                                                                                                                                                                                                                                                                                                                                                                                                                                                                                                                                                                                                                                                                                                                                                                                                                                                                                                                                                                                                                                                                                                                                                                                                                                                                                                                                                                                                                                                                                                                                                                                     | 999%   | 0.000   | Lip13a+Lip13b |            |       |      |       |     |       |      |       |    |       |     |       |     |       |      |       |     |       |      |       |     |       |     |       |     |       |      |       |     |       |     |       |     |       |      |       |     |        |    |        |     |       |     |       |     |       |     |       |      |          |      |         |        |       |     |       |     |          |      |       |        |       |     |       |         |       |     |       |          |       |     |       |        |       |     |       |         |       |      |       |        |       |      |       |        |          |      |         |       |       |      |       |               |             |  |  |  |          |        |    |  |          |        |   |  |        |        |   |  |                      |  |  |  |                               |  |  |  |                        |  |  |  |                                      |  |  |  |               |  |  |  |                   |  |  |  |               |  |  |  |                                                  |  |  |  |                                   |  |  |  |                    |  |  |  |           |  |  |  |           |  |  |  |            |  |  |  |                                                                                                                                                                                                                                                                                                                                                                                                                                                                                                                                                                              |           |           |        |           |            |            |           |              |             |            |                                                  |                                           |                 |                                                  |                          |
| DIAGNOSTICS                                                                                                                                                                                                                                                                                                                                                                                                                                                                                                                                                                                                                                                                                                                                                                                                                                                                                                                                                                                                                                                                                                                                                                                                                                                                                                                                                                                                                                                                                                                                                                                                                                                                                                                                                                                                                                                                                                                                                                                                                                                                                                                                                                                                                                                                                                                                                                                                                                                                                                                               |        |         |               |            |       |      |       |     |       |      |       |    |       |     |       |     |       |      |       |     |       |      |       |     |       |     |       |     |       |      |       |     |       |     |       |     |       |      |       |     |        |    |        |     |       |     |       |     |       |     |       |      |          |      |         |        |       |     |       |     |          |      |       |        |       |     |       |         |       |     |       |          |       |     |       |        |       |     |       |         |       |      |       |        |       |      |       |        |          |      |         |       |       |      |       |               |             |  |  |  |          |        |    |  |          |        |   |  |        |        |   |  |                      |  |  |  |                               |  |  |  |                        |  |  |  |                                      |  |  |  |               |  |  |  |                   |  |  |  |               |  |  |  |                                                  |  |  |  |                                   |  |  |  |                    |  |  |  |           |  |  |  |           |  |  |  |            |  |  |  |                                                                                                                                                                                                                                                                                                                                                                                                                                                                                                                                                                              |           |           |        |           |            |            |           |              |             |            |                                                  |                                           |                 |                                                  |                          |
| 7 info's                                                                                                                                                                                                                                                                                                                                                                                                                                                                                                                                                                                                                                                                                                                                                                                                                                                                                                                                                                                                                                                                                                                                                                                                                                                                                                                                                                                                                                                                                                                                                                                                                                                                                                                                                                                                                                                                                                                                                                                                                                                                                                                                                                                                                                                                                                                                                                                                                                                                                                                                  | RFALSI | 11      |               |            |       |      |       |     |       |      |       |    |       |     |       |     |       |      |       |     |       |      |       |     |       |     |       |     |       |      |       |     |       |     |       |     |       |      |       |     |        |    |        |     |       |     |       |     |       |     |       |      |          |      |         |        |       |     |       |     |          |      |       |        |       |     |       |         |       |     |       |          |       |     |       |        |       |     |       |         |       |      |       |        |       |      |       |        |          |      |         |       |       |      |       |               |             |  |  |  |          |        |    |  |          |        |   |  |        |        |   |  |                      |  |  |  |                               |  |  |  |                        |  |  |  |                                      |  |  |  |               |  |  |  |                   |  |  |  |               |  |  |  |                                                  |  |  |  |                                   |  |  |  |                    |  |  |  |           |  |  |  |           |  |  |  |            |  |  |  |                                                                                                                                                                                                                                                                                                                                                                                                                                                                                                                                                                              |           |           |        |           |            |            |           |              |             |            |                                                  |                                           |                 |                                                  |                          |
| 3 info's                                                                                                                                                                                                                                                                                                                                                                                                                                                                                                                                                                                                                                                                                                                                                                                                                                                                                                                                                                                                                                                                                                                                                                                                                                                                                                                                                                                                                                                                                                                                                                                                                                                                                                                                                                                                                                                                                                                                                                                                                                                                                                                                                                                                                                                                                                                                                                                                                                                                                                                                  | RFALSI | 4       |               |            |       |      |       |     |       |      |       |    |       |     |       |     |       |      |       |     |       |      |       |     |       |     |       |     |       |      |       |     |       |     |       |     |       |      |       |     |        |    |        |     |       |     |       |     |       |     |       |      |          |      |         |        |       |     |       |     |          |      |       |        |       |     |       |         |       |     |       |          |       |     |       |        |       |     |       |         |       |      |       |        |       |      |       |        |          |      |         |       |       |      |       |               |             |  |  |  |          |        |    |  |          |        |   |  |        |        |   |  |                      |  |  |  |                               |  |  |  |                        |  |  |  |                                      |  |  |  |               |  |  |  |                   |  |  |  |               |  |  |  |                                                  |  |  |  |                                   |  |  |  |                    |  |  |  |           |  |  |  |           |  |  |  |            |  |  |  |                                                                                                                                                                                                                                                                                                                                                                                                                                                                                                                                                                              |           |           |        |           |            |            |           |              |             |            |                                                  |                                           |                 |                                                  |                          |
| 1 info                                                                                                                                                                                                                                                                                                                                                                                                                                                                                                                                                                                                                                                                                                                                                                                                                                                                                                                                                                                                                                                                                                                                                                                                                                                                                                                                                                                                                                                                                                                                                                                                                                                                                                                                                                                                                                                                                                                                                                                                                                                                                                                                                                                                                                                                                                                                                                                                                                                                                                                                    | TWOREG | 8       |               |            |       |      |       |     |       |      |       |    |       |     |       |     |       |      |       |     |       |      |       |     |       |     |       |     |       |      |       |     |       |     |       |     |       |      |       |     |        |    |        |     |       |     |       |     |       |     |       |      |          |      |         |        |       |     |       |     |          |      |       |        |       |     |       |         |       |     |       |          |       |     |       |        |       |     |       |         |       |      |       |        |       |      |       |        |          |      |         |       |       |      |       |               |             |  |  |  |          |        |    |  |          |        |   |  |        |        |   |  |                      |  |  |  |                               |  |  |  |                        |  |  |  |                                      |  |  |  |               |  |  |  |                   |  |  |  |               |  |  |  |                                                  |  |  |  |                                   |  |  |  |                    |  |  |  |           |  |  |  |           |  |  |  |            |  |  |  |                                                                                                                                                                                                                                                                                                                                                                                                                                                                                                                                                                              |           |           |        |           |            |            |           |              |             |            |                                                  |                                           |                 |                                                  |                          |
| MISCELLANEOUS OUTPUT                                                                                                                                                                                                                                                                                                                                                                                                                                                                                                                                                                                                                                                                                                                                                                                                                                                                                                                                                                                                                                                                                                                                                                                                                                                                                                                                                                                                                                                                                                                                                                                                                                                                                                                                                                                                                                                                                                                                                                                                                                                                                                                                                                                                                                                                                                                                                                                                                                                                                                                      |        |         |               |            |       |      |       |     |       |      |       |    |       |     |       |     |       |      |       |     |       |      |       |     |       |     |       |     |       |      |       |     |       |     |       |     |       |      |       |     |        |    |        |     |       |     |       |     |       |     |       |      |          |      |         |        |       |     |       |     |          |      |       |        |       |     |       |         |       |     |       |          |       |     |       |        |       |     |       |         |       |      |       |        |       |      |       |        |          |      |         |       |       |      |       |               |             |  |  |  |          |        |    |  |          |        |   |  |        |        |   |  |                      |  |  |  |                               |  |  |  |                        |  |  |  |                                      |  |  |  |               |  |  |  |                   |  |  |  |               |  |  |  |                                                  |  |  |  |                                   |  |  |  |                    |  |  |  |           |  |  |  |           |  |  |  |            |  |  |  |                                                                                                                                                                                                                                                                                                                                                                                                                                                                                                                                                                              |           |           |        |           |            |            |           |              |             |            |                                                  |                                           |                 |                                                  |                          |
| FWHM = 0.076 ppm      S/N = 5                                                                                                                                                                                                                                                                                                                                                                                                                                                                                                                                                                                                                                                                                                                                                                                                                                                                                                                                                                                                                                                                                                                                                                                                                                                                                                                                                                                                                                                                                                                                                                                                                                                                                                                                                                                                                                                                                                                                                                                                                                                                                                                                                                                                                                                                                                                                                                                                                                                                                                             |        |         |               |            |       |      |       |     |       |      |       |    |       |     |       |     |       |      |       |     |       |      |       |     |       |     |       |     |       |      |       |     |       |     |       |     |       |      |       |     |        |    |        |     |       |     |       |     |       |     |       |      |          |      |         |        |       |     |       |     |          |      |       |        |       |     |       |         |       |     |       |          |       |     |       |        |       |     |       |         |       |      |       |        |       |      |       |        |          |      |         |       |       |      |       |               |             |  |  |  |          |        |    |  |          |        |   |  |        |        |   |  |                      |  |  |  |                               |  |  |  |                        |  |  |  |                                      |  |  |  |               |  |  |  |                   |  |  |  |               |  |  |  |                                                  |  |  |  |                                   |  |  |  |                    |  |  |  |           |  |  |  |           |  |  |  |            |  |  |  |                                                                                                                                                                                                                                                                                                                                                                                                                                                                                                                                                                              |           |           |        |           |            |            |           |              |             |            |                                                  |                                           |                 |                                                  |                          |
| Data shift = 0.023 ppm                                                                                                                                                                                                                                                                                                                                                                                                                                                                                                                                                                                                                                                                                                                                                                                                                                                                                                                                                                                                                                                                                                                                                                                                                                                                                                                                                                                                                                                                                                                                                                                                                                                                                                                                                                                                                                                                                                                                                                                                                                                                                                                                                                                                                                                                                                                                                                                                                                                                                                                    |        |         |               |            |       |      |       |     |       |      |       |    |       |     |       |     |       |      |       |     |       |      |       |     |       |     |       |     |       |      |       |     |       |     |       |     |       |      |       |     |        |    |        |     |       |     |       |     |       |     |       |      |          |      |         |        |       |     |       |     |          |      |       |        |       |     |       |         |       |     |       |          |       |     |       |        |       |     |       |         |       |      |       |        |       |      |       |        |          |      |         |       |       |      |       |               |             |  |  |  |          |        |    |  |          |        |   |  |        |        |   |  |                      |  |  |  |                               |  |  |  |                        |  |  |  |                                      |  |  |  |               |  |  |  |                   |  |  |  |               |  |  |  |                                                  |  |  |  |                                   |  |  |  |                    |  |  |  |           |  |  |  |           |  |  |  |            |  |  |  |                                                                                                                                                                                                                                                                                                                                                                                                                                                                                                                                                                              |           |           |        |           |            |            |           |              |             |            |                                                  |                                           |                 |                                                  |                          |
| Ph: 29 deg              12.6 deg/ppm                                                                                                                                                                                                                                                                                                                                                                                                                                                                                                                                                                                                                                                                                                                                                                                                                                                                                                                                                                                                                                                                                                                                                                                                                                                                                                                                                                                                                                                                                                                                                                                                                                                                                                                                                                                                                                                                                                                                                                                                                                                                                                                                                                                                                                                                                                                                                                                                                                                                                                      |        |         |               |            |       |      |       |     |       |      |       |    |       |     |       |     |       |      |       |     |       |      |       |     |       |     |       |     |       |      |       |     |       |     |       |     |       |      |       |     |        |    |        |     |       |     |       |     |       |     |       |      |          |      |         |        |       |     |       |     |          |      |       |        |       |     |       |         |       |     |       |          |       |     |       |        |       |     |       |         |       |      |       |        |       |      |       |        |          |      |         |       |       |      |       |               |             |  |  |  |          |        |    |  |          |        |   |  |        |        |   |  |                      |  |  |  |                               |  |  |  |                        |  |  |  |                                      |  |  |  |               |  |  |  |                   |  |  |  |               |  |  |  |                                                  |  |  |  |                                   |  |  |  |                    |  |  |  |           |  |  |  |           |  |  |  |            |  |  |  |                                                                                                                                                                                                                                                                                                                                                                                                                                                                                                                                                                              |           |           |        |           |            |            |           |              |             |            |                                                  |                                           |                 |                                                  |                          |
| INPUT CHANGES                                                                                                                                                                                                                                                                                                                                                                                                                                                                                                                                                                                                                                                                                                                                                                                                                                                                                                                                                                                                                                                                                                                                                                                                                                                                                                                                                                                                                                                                                                                                                                                                                                                                                                                                                                                                                                                                                                                                                                                                                                                                                                                                                                                                                                                                                                                                                                                                                                                                                                                             |        |         |               |            |       |      |       |     |       |      |       |    |       |     |       |     |       |      |       |     |       |      |       |     |       |     |       |     |       |      |       |     |       |     |       |     |       |      |       |     |        |    |        |     |       |     |       |     |       |     |       |      |          |      |         |        |       |     |       |     |          |      |       |        |       |     |       |         |       |     |       |          |       |     |       |        |       |     |       |         |       |      |       |        |       |      |       |        |          |      |         |       |       |      |       |               |             |  |  |  |          |        |    |  |          |        |   |  |        |        |   |  |                      |  |  |  |                               |  |  |  |                        |  |  |  |                                      |  |  |  |               |  |  |  |                   |  |  |  |               |  |  |  |                                                  |  |  |  |                                   |  |  |  |                    |  |  |  |           |  |  |  |           |  |  |  |            |  |  |  |                                                                                                                                                                                                                                                                                                                                                                                                                                                                                                                                                                              |           |           |        |           |            |            |           |              |             |            |                                                  |                                           |                 |                                                  |                          |
| deltat= 5.000e-04                                                                                                                                                                                                                                                                                                                                                                                                                                                                                                                                                                                                                                                                                                                                                                                                                                                                                                                                                                                                                                                                                                                                                                                                                                                                                                                                                                                                                                                                                                                                                                                                                                                                                                                                                                                                                                                                                                                                                                                                                                                                                                                                                                                                                                                                                                                                                                                                                                                                                                                         |        |         |               |            |       |      |       |     |       |      |       |    |       |     |       |     |       |      |       |     |       |      |       |     |       |     |       |     |       |      |       |     |       |     |       |     |       |      |       |     |        |    |        |     |       |     |       |     |       |     |       |      |          |      |         |        |       |     |       |     |          |      |       |        |       |     |       |         |       |     |       |          |       |     |       |        |       |     |       |         |       |      |       |        |       |      |       |        |          |      |         |       |       |      |       |               |             |  |  |  |          |        |    |  |          |        |   |  |        |        |   |  |                      |  |  |  |                               |  |  |  |                        |  |  |  |                                      |  |  |  |               |  |  |  |                   |  |  |  |               |  |  |  |                                                  |  |  |  |                                   |  |  |  |                    |  |  |  |           |  |  |  |           |  |  |  |            |  |  |  |                                                                                                                                                                                                                                                                                                                                                                                                                                                                                                                                                                              |           |           |        |           |            |            |           |              |             |            |                                                  |                                           |                 |                                                  |                          |
| echot= 288.00                                                                                                                                                                                                                                                                                                                                                                                                                                                                                                                                                                                                                                                                                                                                                                                                                                                                                                                                                                                                                                                                                                                                                                                                                                                                                                                                                                                                                                                                                                                                                                                                                                                                                                                                                                                                                                                                                                                                                                                                                                                                                                                                                                                                                                                                                                                                                                                                                                                                                                                             |        |         |               |            |       |      |       |     |       |      |       |    |       |     |       |     |       |      |       |     |       |      |       |     |       |     |       |     |       |      |       |     |       |     |       |     |       |      |       |     |        |    |        |     |       |     |       |     |       |     |       |      |          |      |         |        |       |     |       |     |          |      |       |        |       |     |       |         |       |     |       |          |       |     |       |        |       |     |       |         |       |      |       |        |       |      |       |        |          |      |         |       |       |      |       |               |             |  |  |  |          |        |    |  |          |        |   |  |        |        |   |  |                      |  |  |  |                               |  |  |  |                        |  |  |  |                                      |  |  |  |               |  |  |  |                   |  |  |  |               |  |  |  |                                                  |  |  |  |                                   |  |  |  |                    |  |  |  |           |  |  |  |           |  |  |  |            |  |  |  |                                                                                                                                                                                                                                                                                                                                                                                                                                                                                                                                                                              |           |           |        |           |            |            |           |              |             |            |                                                  |                                           |                 |                                                  |                          |
| filbas= '/home/stu111733/.lcmodel/basis-sets/gam                                                                                                                                                                                                                                                                                                                                                                                                                                                                                                                                                                                                                                                                                                                                                                                                                                                                                                                                                                                                                                                                                                                                                                                                                                                                                                                                                                                                                                                                                                                                                                                                                                                                                                                                                                                                                                                                                                                                                                                                                                                                                                                                                                                                                                                                                                                                                                                                                                                                                          |        |         |               |            |       |      |       |     |       |      |       |    |       |     |       |     |       |      |       |     |       |      |       |     |       |     |       |     |       |      |       |     |       |     |       |     |       |      |       |     |        |    |        |     |       |     |       |     |       |     |       |      |          |      |         |        |       |     |       |     |          |      |       |        |       |     |       |         |       |     |       |          |       |     |       |        |       |     |       |         |       |      |       |        |       |      |       |        |          |      |         |       |       |      |       |               |             |  |  |  |          |        |    |  |          |        |   |  |        |        |   |  |                      |  |  |  |                               |  |  |  |                        |  |  |  |                                      |  |  |  |               |  |  |  |                   |  |  |  |               |  |  |  |                                                  |  |  |  |                                   |  |  |  |                    |  |  |  |           |  |  |  |           |  |  |  |            |  |  |  |                                                                                                                                                                                                                                                                                                                                                                                                                                                                                                                                                                              |           |           |        |           |            |            |           |              |             |            |                                                  |                                           |                 |                                                  |                          |
| ma_press_te288_128mhz_662d.basis'                                                                                                                                                                                                                                                                                                                                                                                                                                                                                                                                                                                                                                                                                                                                                                                                                                                                                                                                                                                                                                                                                                                                                                                                                                                                                                                                                                                                                                                                                                                                                                                                                                                                                                                                                                                                                                                                                                                                                                                                                                                                                                                                                                                                                                                                                                                                                                                                                                                                                                         |        |         |               |            |       |      |       |     |       |      |       |    |       |     |       |     |       |      |       |     |       |      |       |     |       |     |       |     |       |      |       |     |       |     |       |     |       |      |       |     |        |    |        |     |       |     |       |     |       |     |       |      |          |      |         |        |       |     |       |     |          |      |       |        |       |     |       |         |       |     |       |          |       |     |       |        |       |     |       |         |       |      |       |        |       |      |       |        |          |      |         |       |       |      |       |               |             |  |  |  |          |        |    |  |          |        |   |  |        |        |   |  |                      |  |  |  |                               |  |  |  |                        |  |  |  |                                      |  |  |  |               |  |  |  |                   |  |  |  |               |  |  |  |                                                  |  |  |  |                                   |  |  |  |                    |  |  |  |           |  |  |  |           |  |  |  |            |  |  |  |                                                                                                                                                                                                                                                                                                                                                                                                                                                                                                                                                                              |           |           |        |           |            |            |           |              |             |            |                                                  |                                           |                 |                                                  |                          |
| hzpppm= 1.2776e+02                                                                                                                                                                                                                                                                                                                                                                                                                                                                                                                                                                                                                                                                                                                                                                                                                                                                                                                                                                                                                                                                                                                                                                                                                                                                                                                                                                                                                                                                                                                                                                                                                                                                                                                                                                                                                                                                                                                                                                                                                                                                                                                                                                                                                                                                                                                                                                                                                                                                                                                        |        |         |               |            |       |      |       |     |       |      |       |    |       |     |       |     |       |      |       |     |       |      |       |     |       |     |       |     |       |      |       |     |       |     |       |     |       |      |       |     |        |    |        |     |       |     |       |     |       |     |       |      |          |      |         |        |       |     |       |     |          |      |       |        |       |     |       |         |       |     |       |          |       |     |       |        |       |     |       |         |       |      |       |        |       |      |       |        |          |      |         |       |       |      |       |               |             |  |  |  |          |        |    |  |          |        |   |  |        |        |   |  |                      |  |  |  |                               |  |  |  |                        |  |  |  |                                      |  |  |  |               |  |  |  |                   |  |  |  |               |  |  |  |                                                  |  |  |  |                                   |  |  |  |                    |  |  |  |           |  |  |  |           |  |  |  |            |  |  |  |                                                                                                                                                                                                                                                                                                                                                                                                                                                                                                                                                                              |           |           |        |           |            |            |           |              |             |            |                                                  |                                           |                 |                                                  |                          |
| icolen= 7                                                                                                                                                                                                                                                                                                                                                                                                                                                                                                                                                                                                                                                                                                                                                                                                                                                                                                                                                                                                                                                                                                                                                                                                                                                                                                                                                                                                                                                                                                                                                                                                                                                                                                                                                                                                                                                                                                                                                                                                                                                                                                                                                                                                                                                                                                                                                                                                                                                                                                                                 |        |         |               |            |       |      |       |     |       |      |       |    |       |     |       |     |       |      |       |     |       |      |       |     |       |     |       |     |       |      |       |     |       |     |       |     |       |      |       |     |        |    |        |     |       |     |       |     |       |     |       |      |          |      |         |        |       |     |       |     |          |      |       |        |       |     |       |         |       |     |       |          |       |     |       |        |       |     |       |         |       |      |       |        |       |      |       |        |          |      |         |       |       |      |       |               |             |  |  |  |          |        |    |  |          |        |   |  |        |        |   |  |                      |  |  |  |                               |  |  |  |                        |  |  |  |                                      |  |  |  |               |  |  |  |                   |  |  |  |               |  |  |  |                                                  |  |  |  |                                   |  |  |  |                    |  |  |  |           |  |  |  |           |  |  |  |            |  |  |  |                                                                                                                                                                                                                                                                                                                                                                                                                                                                                                                                                                              |           |           |        |           |            |            |           |              |             |            |                                                  |                                           |                 |                                                  |                          |
| icolst= 3                                                                                                                                                                                                                                                                                                                                                                                                                                                                                                                                                                                                                                                                                                                                                                                                                                                                                                                                                                                                                                                                                                                                                                                                                                                                                                                                                                                                                                                                                                                                                                                                                                                                                                                                                                                                                                                                                                                                                                                                                                                                                                                                                                                                                                                                                                                                                                                                                                                                                                                                 |        |         |               |            |       |      |       |     |       |      |       |    |       |     |       |     |       |      |       |     |       |      |       |     |       |     |       |     |       |      |       |     |       |     |       |     |       |      |       |     |        |    |        |     |       |     |       |     |       |     |       |      |          |      |         |        |       |     |       |     |          |      |       |        |       |     |       |         |       |     |       |          |       |     |       |        |       |     |       |         |       |      |       |        |       |      |       |        |          |      |         |       |       |      |       |               |             |  |  |  |          |        |    |  |          |        |   |  |        |        |   |  |                      |  |  |  |                               |  |  |  |                        |  |  |  |                                      |  |  |  |               |  |  |  |                   |  |  |  |               |  |  |  |                                                  |  |  |  |                                   |  |  |  |                    |  |  |  |           |  |  |  |           |  |  |  |            |  |  |  |                                                                                                                                                                                                                                                                                                                                                                                                                                                                                                                                                                              |           |           |        |           |            |            |           |              |             |            |                                                  |                                           |                 |                                                  |                          |
| irowen= 15                                                                                                                                                                                                                                                                                                                                                                                                                                                                                                                                                                                                                                                                                                                                                                                                                                                                                                                                                                                                                                                                                                                                                                                                                                                                                                                                                                                                                                                                                                                                                                                                                                                                                                                                                                                                                                                                                                                                                                                                                                                                                                                                                                                                                                                                                                                                                                                                                                                                                                                                |        |         |               |            |       |      |       |     |       |      |       |    |       |     |       |     |       |      |       |     |       |      |       |     |       |     |       |     |       |      |       |     |       |     |       |     |       |      |       |     |        |    |        |     |       |     |       |     |       |     |       |      |          |      |         |        |       |     |       |     |          |      |       |        |       |     |       |         |       |     |       |          |       |     |       |        |       |     |       |         |       |      |       |        |       |      |       |        |          |      |         |       |       |      |       |               |             |  |  |  |          |        |    |  |          |        |   |  |        |        |   |  |                      |  |  |  |                               |  |  |  |                        |  |  |  |                                      |  |  |  |               |  |  |  |                   |  |  |  |               |  |  |  |                                                  |  |  |  |                                   |  |  |  |                    |  |  |  |           |  |  |  |           |  |  |  |            |  |  |  |                                                                                                                                                                                                                                                                                                                                                                                                                                                                                                                                                                              |           |           |        |           |            |            |           |              |             |            |                                                  |                                           |                 |                                                  |                          |
| irowst= 6                                                                                                                                                                                                                                                                                                                                                                                                                                                                                                                                                                                                                                                                                                                                                                                                                                                                                                                                                                                                                                                                                                                                                                                                                                                                                                                                                                                                                                                                                                                                                                                                                                                                                                                                                                                                                                                                                                                                                                                                                                                                                                                                                                                                                                                                                                                                                                                                                                                                                                                                 |        |         |               |            |       |      |       |     |       |      |       |    |       |     |       |     |       |      |       |     |       |      |       |     |       |     |       |     |       |      |       |     |       |     |       |     |       |      |       |     |        |    |        |     |       |     |       |     |       |     |       |      |          |      |         |        |       |     |       |     |          |      |       |        |       |     |       |         |       |     |       |          |       |     |       |        |       |     |       |         |       |      |       |        |       |      |       |        |          |      |         |       |       |      |       |               |             |  |  |  |          |        |    |  |          |        |   |  |        |        |   |  |                      |  |  |  |                               |  |  |  |                        |  |  |  |                                      |  |  |  |               |  |  |  |                   |  |  |  |               |  |  |  |                                                  |  |  |  |                                   |  |  |  |                    |  |  |  |           |  |  |  |           |  |  |  |            |  |  |  |                                                                                                                                                                                                                                                                                                                                                                                                                                                                                                                                                                              |           |           |        |           |            |            |           |              |             |            |                                                  |                                           |                 |                                                  |                          |
| islice= 1                                                                                                                                                                                                                                                                                                                                                                                                                                                                                                                                                                                                                                                                                                                                                                                                                                                                                                                                                                                                                                                                                                                                                                                                                                                                                                                                                                                                                                                                                                                                                                                                                                                                                                                                                                                                                                                                                                                                                                                                                                                                                                                                                                                                                                                                                                                                                                                                                                                                                                                                 |        |         |               |            |       |      |       |     |       |      |       |    |       |     |       |     |       |      |       |     |       |      |       |     |       |     |       |     |       |      |       |     |       |     |       |     |       |      |       |     |        |    |        |     |       |     |       |     |       |     |       |      |          |      |         |        |       |     |       |     |          |      |       |        |       |     |       |         |       |     |       |          |       |     |       |        |       |     |       |         |       |      |       |        |       |      |       |        |          |      |         |       |       |      |       |               |             |  |  |  |          |        |    |  |          |        |   |  |        |        |   |  |                      |  |  |  |                               |  |  |  |                        |  |  |  |                                      |  |  |  |               |  |  |  |                   |  |  |  |               |  |  |  |                                                  |  |  |  |                                   |  |  |  |                    |  |  |  |           |  |  |  |           |  |  |  |            |  |  |  |                                                                                                                                                                                                                                                                                                                                                                                                                                                                                                                                                                              |           |           |        |           |            |            |           |              |             |            |                                                  |                                           |                 |                                                  |                          |
| lps= 8                                                                                                                                                                                                                                                                                                                                                                                                                                                                                                                                                                                                                                                                                                                                                                                                                                                                                                                                                                                                                                                                                                                                                                                                                                                                                                                                                                                                                                                                                                                                                                                                                                                                                                                                                                                                                                                                                                                                                                                                                                                                                                                                                                                                                                                                                                                                                                                                                                                                                                                                    |        |         |               |            |       |      |       |     |       |      |       |    |       |     |       |     |       |      |       |     |       |      |       |     |       |     |       |     |       |      |       |     |       |     |       |     |       |      |       |     |        |    |        |     |       |     |       |     |       |     |       |      |          |      |         |        |       |     |       |     |          |      |       |        |       |     |       |         |       |     |       |          |       |     |       |        |       |     |       |         |       |      |       |        |       |      |       |        |          |      |         |       |       |      |       |               |             |  |  |  |          |        |    |  |          |        |   |  |        |        |   |  |                      |  |  |  |                               |  |  |  |                        |  |  |  |                                      |  |  |  |               |  |  |  |                   |  |  |  |               |  |  |  |                                                  |  |  |  |                                   |  |  |  |                    |  |  |  |           |  |  |  |           |  |  |  |            |  |  |  |                                                                                                                                                                                                                                                                                                                                                                                                                                                                                                                                                                              |           |           |        |           |            |            |           |              |             |            |                                                  |                                           |                 |                                                  |                          |
| ltable= 7                                                                                                                                                                                                                                                                                                                                                                                                                                                                                                                                                                                                                                                                                                                                                                                                                                                                                                                                                                                                                                                                                                                                                                                                                                                                                                                                                                                                                                                                                                                                                                                                                                                                                                                                                                                                                                                                                                                                                                                                                                                                                                                                                                                                                                                                                                                                                                                                                                                                                                                                 |        |         |               |            |       |      |       |     |       |      |       |    |       |     |       |     |       |      |       |     |       |      |       |     |       |     |       |     |       |      |       |     |       |     |       |     |       |      |       |     |        |    |        |     |       |     |       |     |       |     |       |      |          |      |         |        |       |     |       |     |          |      |       |        |       |     |       |         |       |     |       |          |       |     |       |        |       |     |       |         |       |      |       |        |       |      |       |        |          |      |         |       |       |      |       |               |             |  |  |  |          |        |    |  |          |        |   |  |        |        |   |  |                      |  |  |  |                               |  |  |  |                        |  |  |  |                                      |  |  |  |               |  |  |  |                   |  |  |  |               |  |  |  |                                                  |  |  |  |                                   |  |  |  |                    |  |  |  |           |  |  |  |           |  |  |  |            |  |  |  |                                                                                                                                                                                                                                                                                                                                                                                                                                                                                                                                                                              |           |           |        |           |            |            |           |              |             |            |                                                  |                                           |                 |                                                  |                          |
| ndcols= 16                                                                                                                                                                                                                                                                                                                                                                                                                                                                                                                                                                                                                                                                                                                                                                                                                                                                                                                                                                                                                                                                                                                                                                                                                                                                                                                                                                                                                                                                                                                                                                                                                                                                                                                                                                                                                                                                                                                                                                                                                                                                                                                                                                                                                                                                                                                                                                                                                                                                                                                                |        |         |               |            |       |      |       |     |       |      |       |    |       |     |       |     |       |      |       |     |       |      |       |     |       |     |       |     |       |      |       |     |       |     |       |     |       |      |       |     |        |    |        |     |       |     |       |     |       |     |       |      |          |      |         |        |       |     |       |     |          |      |       |        |       |     |       |         |       |     |       |          |       |     |       |        |       |     |       |         |       |      |       |        |       |      |       |        |          |      |         |       |       |      |       |               |             |  |  |  |          |        |    |  |          |        |   |  |        |        |   |  |                      |  |  |  |                               |  |  |  |                        |  |  |  |                                      |  |  |  |               |  |  |  |                   |  |  |  |               |  |  |  |                                                  |  |  |  |                                   |  |  |  |                    |  |  |  |           |  |  |  |           |  |  |  |            |  |  |  |                                                                                                                                                                                                                                                                                                                                                                                                                                                                                                                                                                              |           |           |        |           |            |            |           |              |             |            |                                                  |                                           |                 |                                                  |                          |
| ndrows= 20                                                                                                                                                                                                                                                                                                                                                                                                                                                                                                                                                                                                                                                                                                                                                                                                                                                                                                                                                                                                                                                                                                                                                                                                                                                                                                                                                                                                                                                                                                                                                                                                                                                                                                                                                                                                                                                                                                                                                                                                                                                                                                                                                                                                                                                                                                                                                                                                                                                                                                                                |        |         |               |            |       |      |       |     |       |      |       |    |       |     |       |     |       |      |       |     |       |      |       |     |       |     |       |     |       |      |       |     |       |     |       |     |       |      |       |     |        |    |        |     |       |     |       |     |       |     |       |      |          |      |         |        |       |     |       |     |          |      |       |        |       |     |       |         |       |     |       |          |       |     |       |        |       |     |       |         |       |      |       |        |       |      |       |        |          |      |         |       |       |      |       |               |             |  |  |  |          |        |    |  |          |        |   |  |        |        |   |  |                      |  |  |  |                               |  |  |  |                        |  |  |  |                                      |  |  |  |               |  |  |  |                   |  |  |  |               |  |  |  |                                                  |  |  |  |                                   |  |  |  |                    |  |  |  |           |  |  |  |           |  |  |  |            |  |  |  |                                                                                                                                                                                                                                                                                                                                                                                                                                                                                                                                                                              |           |           |        |           |            |            |           |              |             |            |                                                  |                                           |                 |                                                  |                          |
| ndslic= 1                                                                                                                                                                                                                                                                                                                                                                                                                                                                                                                                                                                                                                                                                                                                                                                                                                                                                                                                                                                                                                                                                                                                                                                                                                                                                                                                                                                                                                                                                                                                                                                                                                                                                                                                                                                                                                                                                                                                                                                                                                                                                                                                                                                                                                                                                                                                                                                                                                                                                                                                 |        |         |               |            |       |      |       |     |       |      |       |    |       |     |       |     |       |      |       |     |       |      |       |     |       |     |       |     |       |      |       |     |       |     |       |     |       |      |       |     |        |    |        |     |       |     |       |     |       |     |       |      |          |      |         |        |       |     |       |     |          |      |       |        |       |     |       |         |       |     |       |          |       |     |       |        |       |     |       |         |       |      |       |        |       |      |       |        |          |      |         |       |       |      |       |               |             |  |  |  |          |        |    |  |          |        |   |  |        |        |   |  |                      |  |  |  |                               |  |  |  |                        |  |  |  |                                      |  |  |  |               |  |  |  |                   |  |  |  |               |  |  |  |                                                  |  |  |  |                                   |  |  |  |                    |  |  |  |           |  |  |  |           |  |  |  |            |  |  |  |                                                                                                                                                                                                                                                                                                                                                                                                                                                                                                                                                                              |           |           |        |           |            |            |           |              |             |            |                                                  |                                           |                 |                                                  |                          |
| nunfil= 1024                                                                                                                                                                                                                                                                                                                                                                                                                                                                                                                                                                                                                                                                                                                                                                                                                                                                                                                                                                                                                                                                                                                                                                                                                                                                                                                                                                                                                                                                                                                                                                                                                                                                                                                                                                                                                                                                                                                                                                                                                                                                                                                                                                                                                                                                                                                                                                                                                                                                                                                              |        |         |               |            |       |      |       |     |       |      |       |    |       |     |       |     |       |      |       |     |       |      |       |     |       |     |       |     |       |      |       |     |       |     |       |     |       |      |       |     |        |    |        |     |       |     |       |     |       |     |       |      |          |      |         |        |       |     |       |     |          |      |       |        |       |     |       |         |       |     |       |          |       |     |       |        |       |     |       |         |       |      |       |        |       |      |       |        |          |      |         |       |       |      |       |               |             |  |  |  |          |        |    |  |          |        |   |  |        |        |   |  |                      |  |  |  |                               |  |  |  |                        |  |  |  |                                      |  |  |  |               |  |  |  |                   |  |  |  |               |  |  |  |                                                  |  |  |  |                                   |  |  |  |                    |  |  |  |           |  |  |  |           |  |  |  |            |  |  |  |                                                                                                                                                                                                                                                                                                                                                                                                                                                                                                                                                                              |           |           |        |           |            |            |           |              |             |            |                                                  |                                           |                 |                                                  |                          |
| ppmend= 1.0                                                                                                                                                                                                                                                                                                                                                                                                                                                                                                                                                                                                                                                                                                                                                                                                                                                                                                                                                                                                                                                                                                                                                                                                                                                                                                                                                                                                                                                                                                                                                                                                                                                                                                                                                                                                                                                                                                                                                                                                                                                                                                                                                                                                                                                                                                                                                                                                                                                                                                                               |        |         |               |            |       |      |       |     |       |      |       |    |       |     |       |     |       |      |       |     |       |      |       |     |       |     |       |     |       |      |       |     |       |     |       |     |       |      |       |     |        |    |        |     |       |     |       |     |       |     |       |      |          |      |         |        |       |     |       |     |          |      |       |        |       |     |       |         |       |     |       |          |       |     |       |        |       |     |       |         |       |      |       |        |       |      |       |        |          |      |         |       |       |      |       |               |             |  |  |  |          |        |    |  |          |        |   |  |        |        |   |  |                      |  |  |  |                               |  |  |  |                        |  |  |  |                                      |  |  |  |               |  |  |  |                   |  |  |  |               |  |  |  |                                                  |  |  |  |                                   |  |  |  |                    |  |  |  |           |  |  |  |           |  |  |  |            |  |  |  |                                                                                                                                                                                                                                                                                                                                                                                                                                                                                                                                                                              |           |           |        |           |            |            |           |              |             |            |                                                  |                                           |                 |                                                  |                          |
| ppmst= 4.0                                                                                                                                                                                                                                                                                                                                                                                                                                                                                                                                                                                                                                                                                                                                                                                                                                                                                                                                                                                                                                                                                                                                                                                                                                                                                                                                                                                                                                                                                                                                                                                                                                                                                                                                                                                                                                                                                                                                                                                                                                                                                                                                                                                                                                                                                                                                                                                                                                                                                                                                |        |         |               |            |       |      |       |     |       |      |       |    |       |     |       |     |       |      |       |     |       |      |       |     |       |     |       |     |       |      |       |     |       |     |       |     |       |      |       |     |        |    |        |     |       |     |       |     |       |     |       |      |          |      |         |        |       |     |       |     |          |      |       |        |       |     |       |         |       |     |       |          |       |     |       |        |       |     |       |         |       |      |       |        |       |      |       |        |          |      |         |       |       |      |       |               |             |  |  |  |          |        |    |  |          |        |   |  |        |        |   |  |                      |  |  |  |                               |  |  |  |                        |  |  |  |                                      |  |  |  |               |  |  |  |                   |  |  |  |               |  |  |  |                                                  |  |  |  |                                   |  |  |  |                    |  |  |  |           |  |  |  |           |  |  |  |            |  |  |  |                                                                                                                                                                                                                                                                                                                                                                                                                                                                                                                                                                              |           |           |        |           |            |            |           |              |             |            |                                                  |                                           |                 |                                                  |                          |
| savdir= '/home/stu111733/.lcmodel/saved/MR_Spekt                                                                                                                                                                                                                                                                                                                                                                                                                                                                                                                                                                                                                                                                                                                                                                                                                                                                                                                                                                                                                                                                                                                                                                                                                                                                                                                                                                                                                                                                                                                                                                                                                                                                                                                                                                                                                                                                                                                                                                                                                                                                                                                                                                                                                                                                                                                                                                                                                                                                                          |        |         |               |            |       |      |       |     |       |      |       |    |       |     |       |     |       |      |       |     |       |      |       |     |       |     |       |     |       |      |       |     |       |     |       |     |       |      |       |     |        |    |        |     |       |     |       |     |       |     |       |      |          |      |         |        |       |     |       |     |          |      |       |        |       |     |       |         |       |     |       |          |       |     |       |        |       |     |       |         |       |      |       |        |       |      |       |        |          |      |         |       |       |      |       |               |             |  |  |  |          |        |    |  |          |        |   |  |        |        |   |  |                      |  |  |  |                               |  |  |  |                        |  |  |  |                                      |  |  |  |               |  |  |  |                   |  |  |  |               |  |  |  |                                                  |  |  |  |                                   |  |  |  |                    |  |  |  |           |  |  |  |           |  |  |  |            |  |  |  |                                                                                                                                                                                                                                                                                                                                                                                                                                                                                                                                                                              |           |           |        |           |            |            |           |              |             |            |                                                  |                                           |                 |                                                  |                          |
| roskopie/s04/2019.08.27_10:25:40      '/'                                                                                                                                                                                                                                                                                                                                                                                                                                                                                                                                                                                                                                                                                                                                                                                                                                                                                                                                                                                                                                                                                                                                                                                                                                                                                                                                                                                                                                                                                                                                                                                                                                                                                                                                                                                                                                                                                                                                                                                                                                                                                                                                                                                                                                                                                                                                                                                                                                                                                                 |        |         |               |            |       |      |       |     |       |      |       |    |       |     |       |     |       |      |       |     |       |      |       |     |       |     |       |     |       |      |       |     |       |     |       |     |       |      |       |     |        |    |        |     |       |     |       |     |       |     |       |      |          |      |         |        |       |     |       |     |          |      |       |        |       |     |       |         |       |     |       |          |       |     |       |        |       |     |       |         |       |      |       |        |       |      |       |        |          |      |         |       |       |      |       |               |             |  |  |  |          |        |    |  |          |        |   |  |        |        |   |  |                      |  |  |  |                               |  |  |  |                        |  |  |  |                                      |  |  |  |               |  |  |  |                   |  |  |  |               |  |  |  |                                                  |  |  |  |                                   |  |  |  |                    |  |  |  |           |  |  |  |           |  |  |  |            |  |  |  |                                                                                                                                                                                                                                                                                                                                                                                                                                                                                                                                                                              |           |           |        |           |            |            |           |              |             |            |                                                  |                                           |                 |                                                  |                          |
| sptype= 'tumor'                                                                                                                                                                                                                                                                                                                                                                                                                                                                                                                                                                                                                                                                                                                                                                                                                                                                                                                                                                                                                                                                                                                                                                                                                                                                                                                                                                                                                                                                                                                                                                                                                                                                                                                                                                                                                                                                                                                                                                                                                                                                                                                                                                                                                                                                                                                                                                                                                                                                                                                           |        |         |               |            |       |      |       |     |       |      |       |    |       |     |       |     |       |      |       |     |       |      |       |     |       |     |       |     |       |      |       |     |       |     |       |     |       |      |       |     |        |    |        |     |       |     |       |     |       |     |       |      |          |      |         |        |       |     |       |     |          |      |       |        |       |     |       |         |       |     |       |          |       |     |       |        |       |     |       |         |       |      |       |        |       |      |       |        |          |      |         |       |       |      |       |               |             |  |  |  |          |        |    |  |          |        |   |  |        |        |   |  |                      |  |  |  |                               |  |  |  |                        |  |  |  |                                      |  |  |  |               |  |  |  |                   |  |  |  |               |  |  |  |                                                  |  |  |  |                                   |  |  |  |                    |  |  |  |           |  |  |  |           |  |  |  |            |  |  |  |                                                                                                                                                                                                                                                                                                                                                                                                                                                                                                                                                                              |           |           |        |           |            |            |           |              |             |            |                                                  |                                           |                 |                                                  |                          |
| srcraw= '/home/data/Studies/GBM_Spektro/data/s04                                                                                                                                                                                                                                                                                                                                                                                                                                                                                                                                                                                                                                                                                                                                                                                                                                                                                                                                                                                                                                                                                                                                                                                                                                                                                                                                                                                                                                                                                                                                                                                                                                                                                                                                                                                                                                                                                                                                                                                                                                                                                                                                                                                                                                                                                                                                                                                                                                                                                          |        |         |               |            |       |      |       |     |       |      |       |    |       |     |       |     |       |      |       |     |       |      |       |     |       |     |       |     |       |      |       |     |       |     |       |     |       |      |       |     |        |    |        |     |       |     |       |     |       |     |       |      |          |      |         |        |       |     |       |     |          |      |       |        |       |     |       |         |       |     |       |          |       |     |       |        |       |     |       |         |       |      |       |        |       |      |       |        |          |      |         |       |       |      |       |               |             |  |  |  |          |        |    |  |          |        |   |  |        |        |   |  |                      |  |  |  |                               |  |  |  |                        |  |  |  |                                      |  |  |  |               |  |  |  |                   |  |  |  |               |  |  |  |                                                  |  |  |  |                                   |  |  |  |                    |  |  |  |           |  |  |  |           |  |  |  |            |  |  |  |                                                                                                                                                                                                                                                                                                                                                                                                                                                                                                                                                                              |           |           |        |           |            |            |           |              |             |            |                                                  |                                           |                 |                                                  |                          |
| /DBIEX_5_1_raw_act.SDAT'                                                                                                                                                                                                                                                                                                                                                                                                                                                                                                                                                                                                                                                                                                                                                                                                                                                                                                                                                                                                                                                                                                                                                                                                                                                                                                                                                                                                                                                                                                                                                                                                                                                                                                                                                                                                                                                                                                                                                                                                                                                                                                                                                                                                                                                                                                                                                                                                                                                                                                                  |        |         |               |            |       |      |       |     |       |      |       |    |       |     |       |     |       |      |       |     |       |      |       |     |       |     |       |     |       |      |       |     |       |     |       |     |       |      |       |     |        |    |        |     |       |     |       |     |       |     |       |      |          |      |         |        |       |     |       |     |          |      |       |        |       |     |       |         |       |     |       |          |       |     |       |        |       |     |       |         |       |      |       |        |       |      |       |        |          |      |         |       |       |      |       |               |             |  |  |  |          |        |    |  |          |        |   |  |        |        |   |  |                      |  |  |  |                               |  |  |  |                        |  |  |  |                                      |  |  |  |               |  |  |  |                   |  |  |  |               |  |  |  |                                                  |  |  |  |                                   |  |  |  |                    |  |  |  |           |  |  |  |           |  |  |  |            |  |  |  |                                                                                                                                                                                                                                                                                                                                                                                                                                                                                                                                                                              |           |           |        |           |            |            |           |              |             |            |                                                  |                                           |                 |                                                  |                          |

P42 - tumor  
voxel 16;7

Row#16 Col#7 (2019.08.27 10:55:20) Subject 11 7.88e-01 mL, TE/TR/NS=288/1500/2 (s2DSI\_TE288 TR1500)

Data of: *Sektion Biomedizinische Bildgebung, Christian-Albrechts-Universitaet zu Kiel*

LCModel (Version 6.3-1J) Copyright: S.W. Provencher.

Ref.: *Magn. Reson. Med. 30:672-679 (1993).*

28-November-2019 16:41

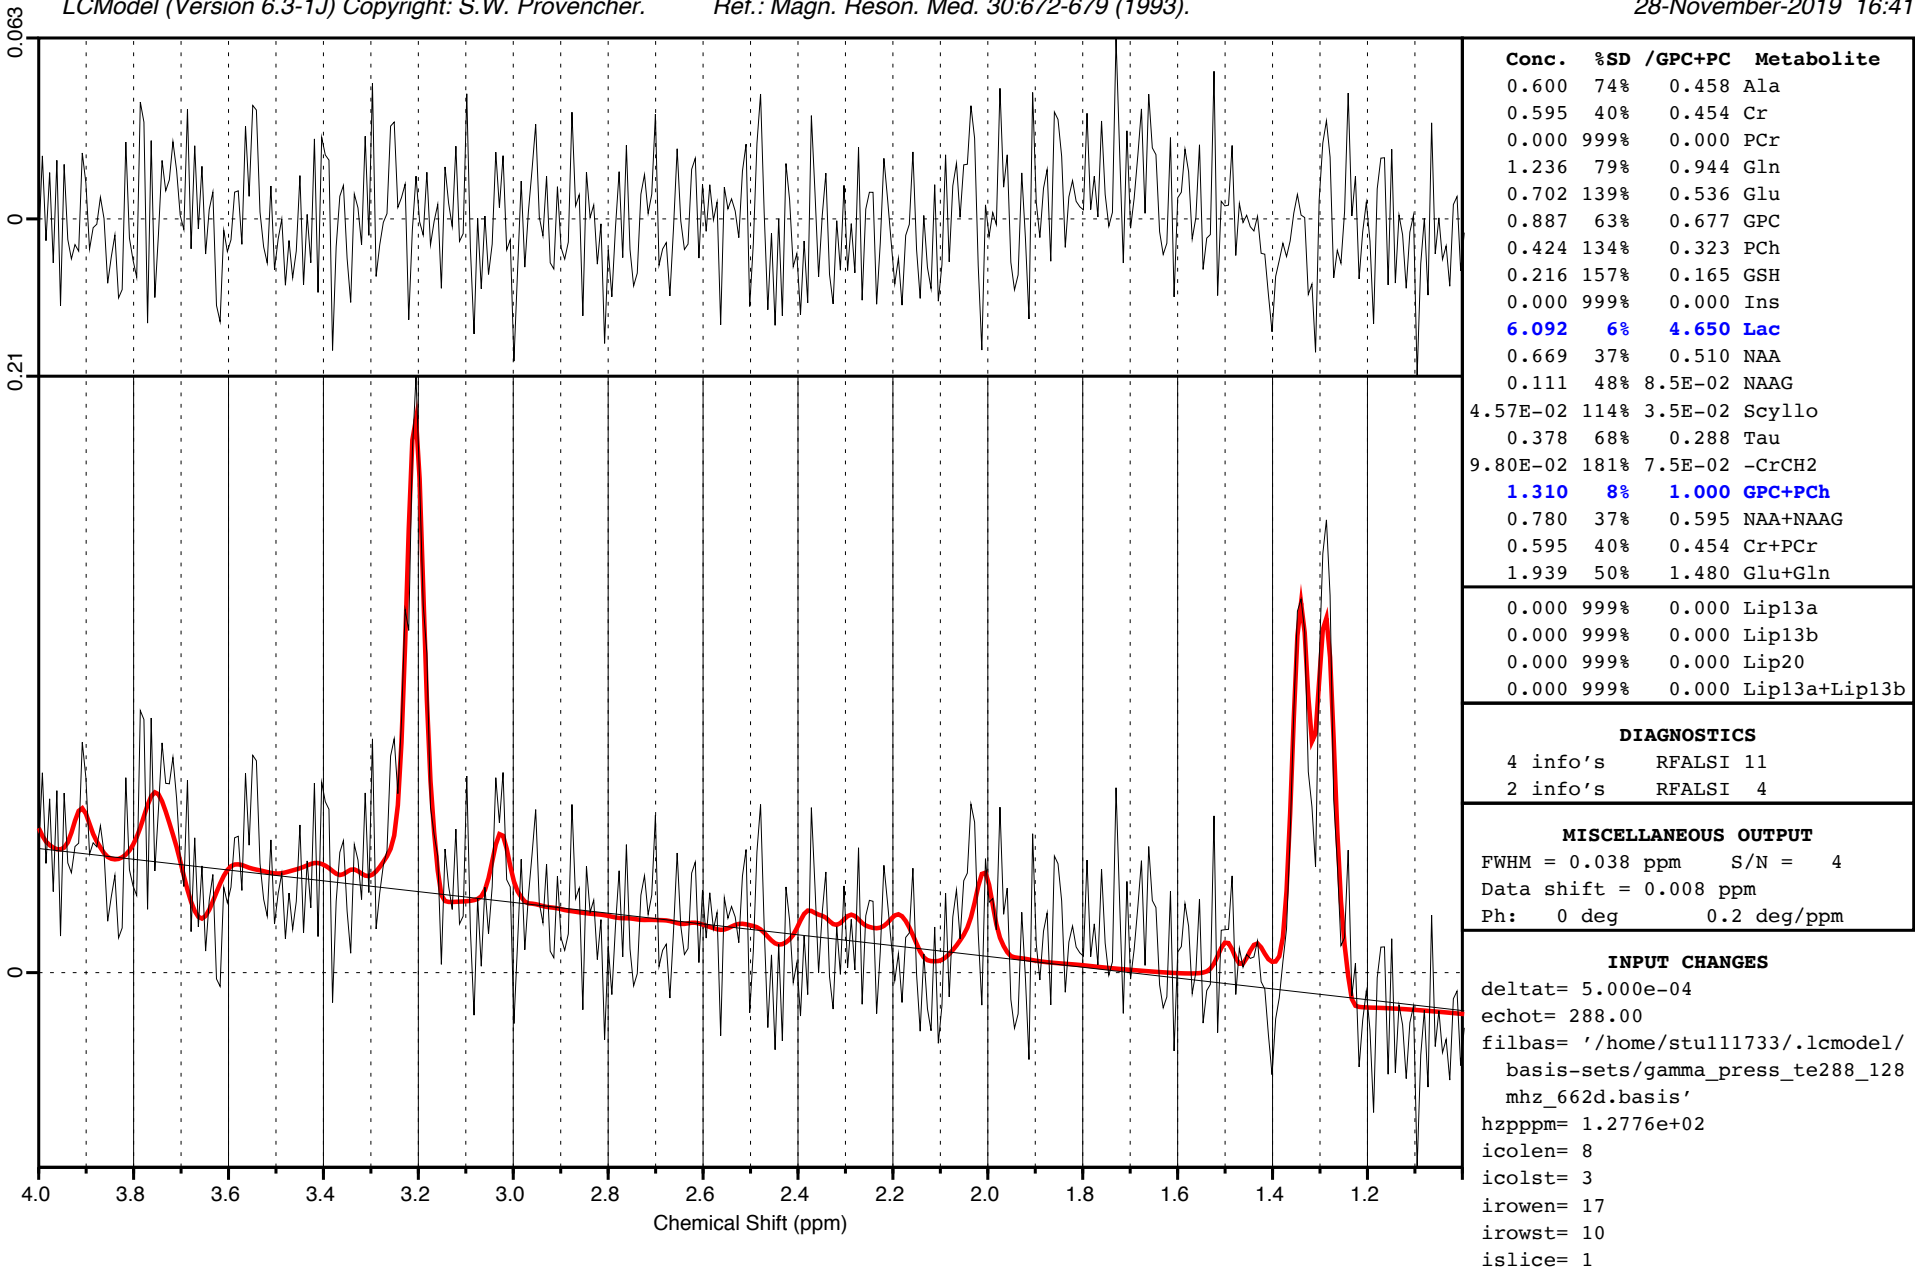

Row#16 Col#7 (2019.08.27 10:55:20) Subject 11 7.88e-01 mL, TE/TR/NS=288/1500/2 (s2DSI\_TE288 TR1500)

Data of: *Sektion Biomedizinische Bildgebung, Christian-Albrechts-Universitaet zu Kiel*

LCModel (Version 6.3-1J) Copyright: S.W. Provencher.      Ref.: Magn. Reson. Med. 30:672-679 (1993).

28-November-2019 16:41

|                                                                                                                                                                                                                                                                                                                                                                                                                                                                                                                                                                                                                                                                                                                                                                                                                                                                                                                                                                                                                                                                                                                                                                                                                                                                                                                                                                                                                                                                                                                                                    |                                                                                                                                                                                                                                                                                                                                                                                   |
|----------------------------------------------------------------------------------------------------------------------------------------------------------------------------------------------------------------------------------------------------------------------------------------------------------------------------------------------------------------------------------------------------------------------------------------------------------------------------------------------------------------------------------------------------------------------------------------------------------------------------------------------------------------------------------------------------------------------------------------------------------------------------------------------------------------------------------------------------------------------------------------------------------------------------------------------------------------------------------------------------------------------------------------------------------------------------------------------------------------------------------------------------------------------------------------------------------------------------------------------------------------------------------------------------------------------------------------------------------------------------------------------------------------------------------------------------------------------------------------------------------------------------------------------------|-----------------------------------------------------------------------------------------------------------------------------------------------------------------------------------------------------------------------------------------------------------------------------------------------------------------------------------------------------------------------------------|
| <div><div><div><div>Conc.</div><div>%SD</div><div>/GPC+PC</div><div>Metabolite</div></div><div><div>0.600</div><div>74%</div><div>0.458</div><div>Ala</div></div><div><div>0.595</div><div>40%</div><div>0.454</div><div>Cr</div></div><div><div>0.000</div><div>999%</div><div>0.000</div><div>PCr</div></div><div><div>1.236</div><div>79%</div><div>0.944</div><div>Gln</div></div><div><div>0.702</div><div>139%</div><div>0.536</div><div>Glu</div></div><div><div>0.887</div><div>63%</div><div>0.677</div><div>GPC</div></div><div><div>0.424</div><div>134%</div><div>0.323</div><div>PCh</div></div><div><div>0.216</div><div>157%</div><div>0.165</div><div>GSH</div></div><div><div>0.000</div><div>999%</div><div>0.000</div><div>Ins</div></div><div><div>6.092</div><div>6%</div><div>4.650</div><div>Lac</div></div><div><div>0.669</div><div>37%</div><div>0.510</div><div>NAA</div></div><div><div>0.111</div><div>48%</div><div>8.5E-02</div><div>NAAG</div></div><div><div>4.57E-02</div><div>114%</div><div>3.5E-02</div><div>Scyllo</div></div><div><div>0.378</div><div>68%</div><div>0.288</div><div>Tau</div></div><div><div>9.80E-02</div><div>181%</div><div>7.5E-02</div><div>-CrCH2</div></div><div><div>1.310</div><div>8%</div><div>1.000</div><div>GPC+PCh</div></div><div><div>0.780</div><div>37%</div><div>0.595</div><div>NAA+NAAG</div></div><div><div>0.595</div><div>40%</div><div>0.454</div><div>Cr+PCr</div></div><div><div>1.939</div><div>50%</div><div>1.480</div><div>Glu+Gln</div></div></div></div> | <div><div>islice= 1</div><div>lps= 8</div><div>ltable= 7</div><div>ndcols= 16</div><div>ndrows= 20</div><div>ndslic= 1</div><div>nunfil= 1024</div><div>ppmend= 1.0</div><div>ppmst= 4.0</div><div>savdir= '/home/stu111733/.lcmodel/saved/'</div><div>sptype= 'tumor'</div><div>srcraw= '/home/data/Studies/GBM_Spektrum/data/s11</div><div>/DBIEX_5_1_raw_act.SDAT'</div></div> |
| <div><div><div><div>0.000</div><div>999%</div><div>0.000</div><div>Lip13a</div></div><div><div>0.000</div><div>999%</div><div>0.000</div><div>Lip13b</div></div><div><div>0.000</div><div>999%</div><div>0.000</div><div>Lip20</div></div><div><div>0.000</div><div>999%</div><div>0.000</div><div>Lip13a+Lip13b</div></div></div></div>                                                                                                                                                                                                                                                                                                                                                                                                                                                                                                                                                                                                                                                                                                                                                                                                                                                                                                                                                                                                                                                                                                                                                                                                           |                                                                                                                                                                                                                                                                                                                                                                                   |
| <div><div><div>DIAGNOSTICS</div><div>4 info's      RFALSI 11</div><div>2 info's      RFALSI 4</div></div></div>                                                                                                                                                                                                                                                                                                                                                                                                                                                                                                                                                                                                                                                                                                                                                                                                                                                                                                                                                                                                                                                                                                                                                                                                                                                                                                                                                                                                                                    |                                                                                                                                                                                                                                                                                                                                                                                   |
| <div><div><div>MISCELLANEOUS OUTPUT</div><div>FWHM = 0.038 ppm      S/N = 4</div><div>Data shift = 0.008 ppm</div><div>Ph: 0 deg      0.2 deg/ppm</div></div></div>                                                                                                                                                                                                                                                                                                                                                                                                                                                                                                                                                                                                                                                                                                                                                                                                                                                                                                                                                                                                                                                                                                                                                                                                                                                                                                                                                                                |                                                                                                                                                                                                                                                                                                                                                                                   |
| <div><div><div>INPUT CHANGES</div><div>deltat= 5.000e-04</div><div>echot= 288.00</div><div>filbas= '/home/stu111733/.lcmodel/basis-sets/gam</div><div>ma_press_te288_128mhz_662d.basis'</div><div>hzpppm= 1.2776e+02</div><div>icolen= 8</div><div>icolst= 3</div><div>irowen= 17</div><div>irowst= 10</div></div></div>                                                                                                                                                                                                                                                                                                                                                                                                                                                                                                                                                                                                                                                                                                                                                                                                                                                                                                                                                                                                                                                                                                                                                                                                                           |                                                                                                                                                                                                                                                                                                                                                                                   |

P42 - edema  
voxel 13;6

Row#13 Col#6 (2019.08.27 10:55:20) Subject 11 7.88e-01 mL, TE/TR/NS=288/1500/2 (s2DSI\_TE288 TR1500)

Data of: Sektion Biomedizinische Bildgebung, Christian-Albrechts-Universitaet zu Kiel

LCModel (Version 6.3-1J) Copyright: S.W. Provencher.

Ref.: Magn. Reson. Med. 30:672-679 (1993).

28-November-2019 16:40

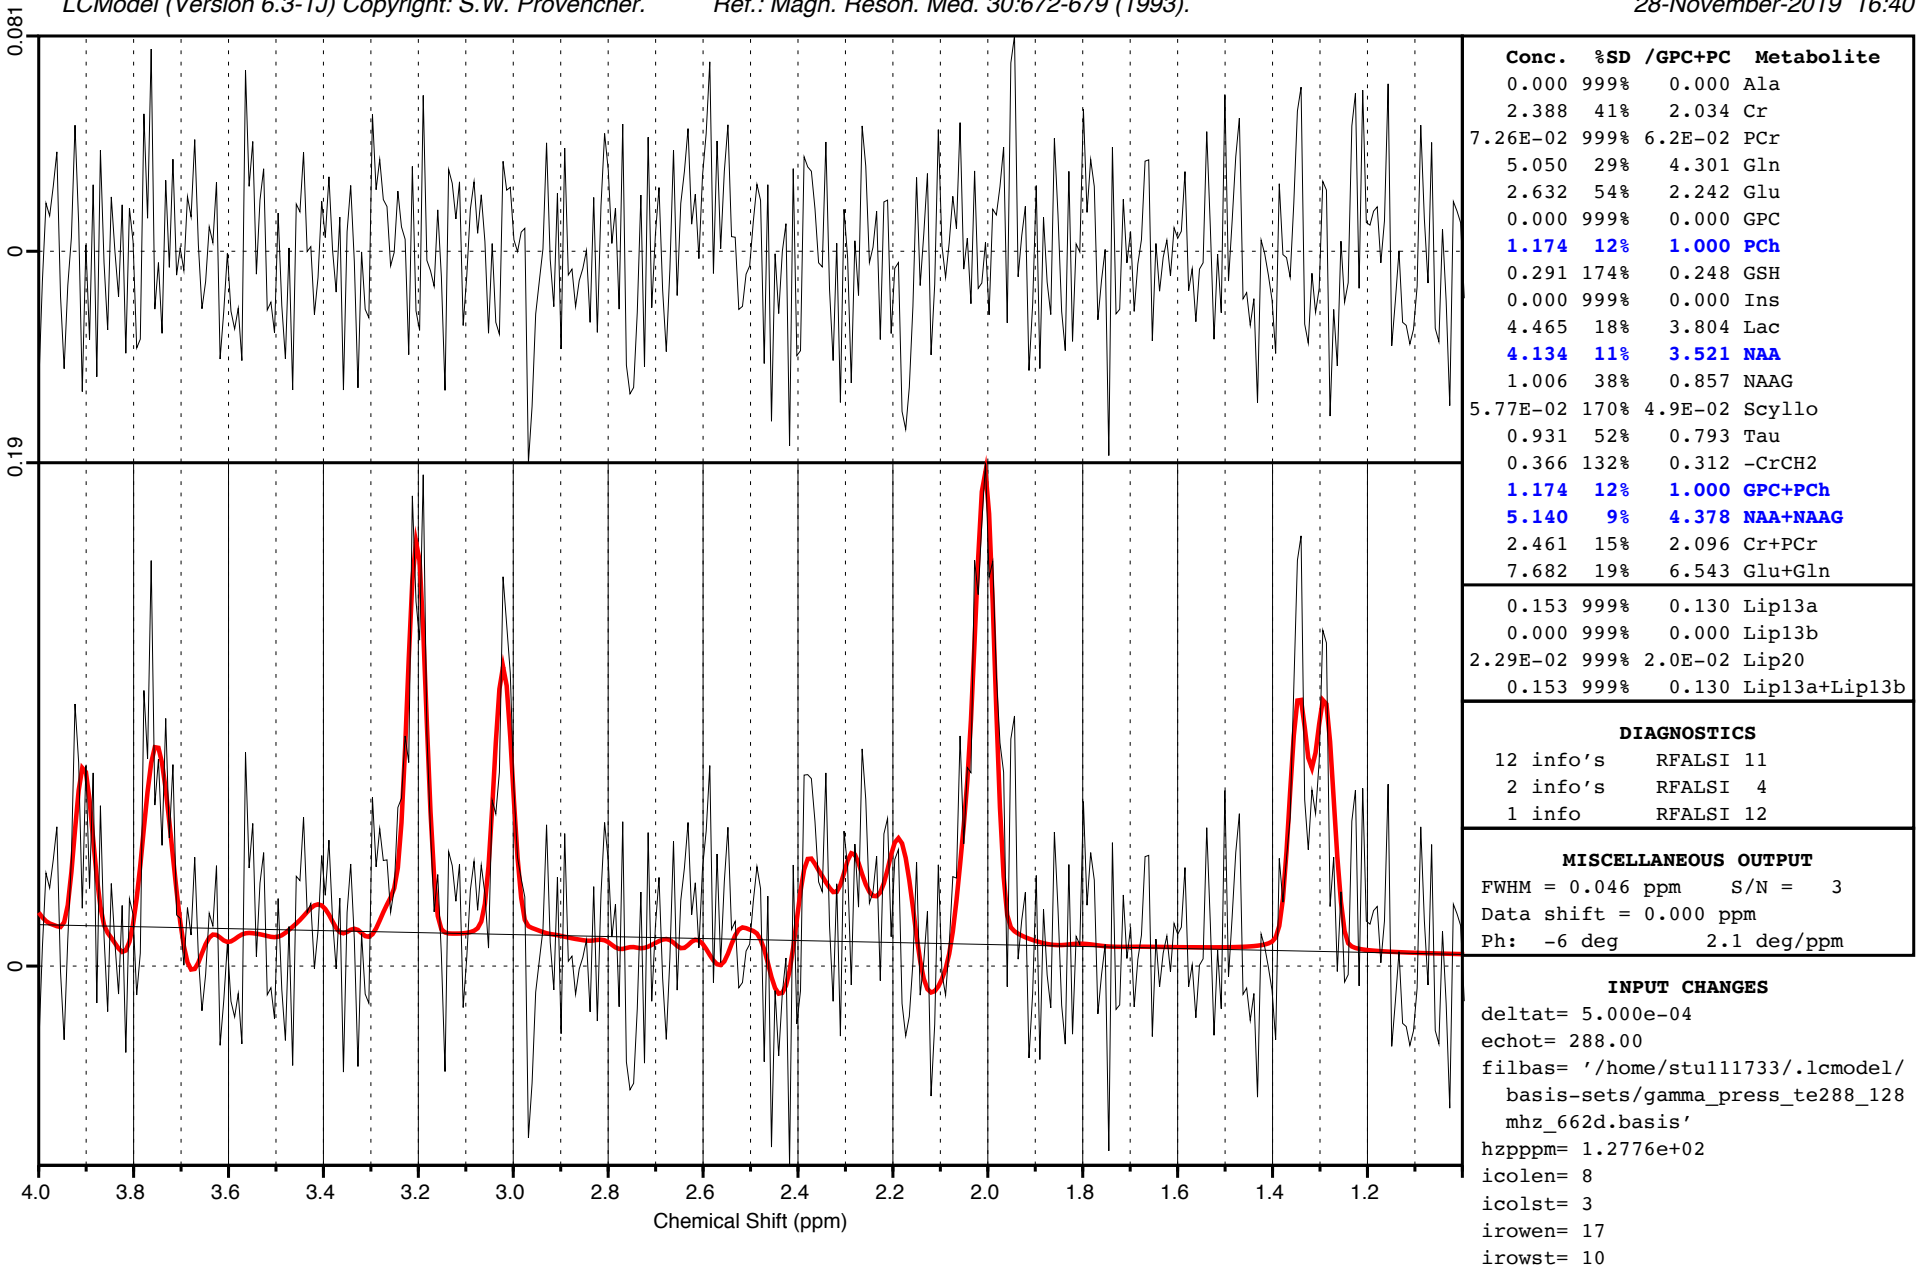

## P42 - edema voxel 13;6

Row#13 Col#6 (2019.08.27 10:55:20) Subject 11 7.88e-01 mL, TE/TR/NS=288/1500/2 (s2DSI\_TE288 TR1500)

Data of: *Sektion Biomedizinische Bildgebung, Christian-Albrechts-Universitaet zu Kiel*

LCModel (Version 6.3-1J) Copyright: S.W. Provencher.

*Ref.: Magn. Reson. Med. 30:672-679 (1993).*

28-November-2019 16:40

| <table><tr><th>Conc.</th><th>%SD</th><th>/GPC+PC</th><th>Metabolite</th></tr><tr><td>0.000</td><td>999%</td><td>0.000</td><td>Ala</td></tr><tr><td>2.388</td><td>41%</td><td>2.034</td><td>Cr</td></tr><tr><td>7.26E-02</td><td>999%</td><td>6.2E-02</td><td>PCr</td></tr><tr><td>5.050</td><td>29%</td><td>4.301</td><td>Gln</td></tr><tr><td>2.632</td><td>54%</td><td>2.242</td><td>Glu</td></tr><tr><td>0.000</td><td>999%</td><td>0.000</td><td>GPC</td></tr><tr><td>1.174</td><td>12%</td><td>1.000</td><td>PCh</td></tr><tr><td>0.291</td><td>174%</td><td>0.248</td><td>GSH</td></tr><tr><td>0.000</td><td>999%</td><td>0.000</td><td>Ins</td></tr><tr><td>4.465</td><td>18%</td><td>3.804</td><td>Lac</td></tr><tr><td>4.134</td><td>11%</td><td>3.521</td><td>NAA</td></tr><tr><td>1.006</td><td>38%</td><td>0.857</td><td>NAAG</td></tr><tr><td>5.77E-02</td><td>170%</td><td>4.9E-02</td><td>Scyllo</td></tr><tr><td>0.931</td><td>52%</td><td>0.793</td><td>Tau</td></tr><tr><td>0.366</td><td>132%</td><td>0.312</td><td>-CrCH2</td></tr><tr><td>1.174</td><td>12%</td><td>1.000</td><td>GPC+PCh</td></tr><tr><td>5.140</td><td>9%</td><td>4.378</td><td>NAA+NAAG</td></tr><tr><td>2.461</td><td>15%</td><td>2.096</td><td>Cr+PCr</td></tr><tr><td>7.682</td><td>19%</td><td>6.543</td><td>Glu+Gln</td></tr></table> | Conc.                | %SD     | /GPC+PC           | Metabolite | 0.000                  | 999%     | 0.000                                           | Ala         | 2.388                             | 41%  | 2.034              | Cr    | 7.26E-02  | 999% | 6.2E-02   | PCr           | 5.050      | 29% | 4.301 | Gln | 2.632 | 54% | 2.242 | Glu | 0.000 | 999% | 0.000 | GPC | 1.174 | 12% | 1.000 | PCh | 0.291 | 174% | 0.248 | GSH | 0.000 | 999% | 0.000 | Ins | 4.465 | 18% | 3.804 | Lac | 4.134 | 11% | 3.521 | NAA | 1.006 | 38% | 0.857 | NAAG | 5.77E-02 | 170% | 4.9E-02 | Scyllo | 0.931 | 52% | 0.793 | Tau | 0.366 | 132% | 0.312 | -CrCH2 | 1.174 | 12% | 1.000 | GPC+PCh | 5.140 | 9% | 4.378 | NAA+NAAG | 2.461 | 15% | 2.096 | Cr+PCr | 7.682 | 19% | 6.543 | Glu+Gln | <table><tr><td>irowst= 10</td></tr><tr><td>islice= 1</td></tr><tr><td>lps= 8</td></tr><tr><td>ltable= 7</td></tr><tr><td>ndcols= 16</td></tr><tr><td>ndrows= 20</td></tr><tr><td>ndslic= 1</td></tr><tr><td>nunfil= 1024</td></tr><tr><td>ppmend= 1.0</td></tr><tr><td>ppmst= 4.0</td></tr><tr><td>savdir= '/home/stu11733/.lcmode1/saved/'</td></tr><tr><td>sptype= 'tumor'</td></tr><tr><td>srcraw= '/home/data/Studies/GBM_Spektro/data/s11</td></tr><tr><td>/DBIEX_5_1_raw_act.SDAT'</td></tr></table> | irowst= 10 | islice= 1 | lps= 8 | ltable= 7 | ndcols= 16 | ndrows= 20 | ndslic= 1 | nunfil= 1024 | ppmend= 1.0 | ppmst= 4.0 | savdir= '/home/stu11733/.lcmode1/saved/' | sptype= 'tumor' | srcraw= '/home/data/Studies/GBM_Spektro/data/s11 | /DBIEX_5_1_raw_act.SDAT' |
|------------------------------------------------------------------------------------------------------------------------------------------------------------------------------------------------------------------------------------------------------------------------------------------------------------------------------------------------------------------------------------------------------------------------------------------------------------------------------------------------------------------------------------------------------------------------------------------------------------------------------------------------------------------------------------------------------------------------------------------------------------------------------------------------------------------------------------------------------------------------------------------------------------------------------------------------------------------------------------------------------------------------------------------------------------------------------------------------------------------------------------------------------------------------------------------------------------------------------------------------------------------------------------------------------------------------------------|----------------------|---------|-------------------|------------|------------------------|----------|-------------------------------------------------|-------------|-----------------------------------|------|--------------------|-------|-----------|------|-----------|---------------|------------|-----|-------|-----|-------|-----|-------|-----|-------|------|-------|-----|-------|-----|-------|-----|-------|------|-------|-----|-------|------|-------|-----|-------|-----|-------|-----|-------|-----|-------|-----|-------|-----|-------|------|----------|------|---------|--------|-------|-----|-------|-----|-------|------|-------|--------|-------|-----|-------|---------|-------|----|-------|----------|-------|-----|-------|--------|-------|-----|-------|---------|------------------------------------------------------------------------------------------------------------------------------------------------------------------------------------------------------------------------------------------------------------------------------------------------------------------------------------------------------------------------------------------------------------------------------------------------------------------------------------------------------------|------------|-----------|--------|-----------|------------|------------|-----------|--------------|-------------|------------|------------------------------------------|-----------------|--------------------------------------------------|--------------------------|
| Conc.                                                                                                                                                                                                                                                                                                                                                                                                                                                                                                                                                                                                                                                                                                                                                                                                                                                                                                                                                                                                                                                                                                                                                                                                                                                                                                                              | %SD                  | /GPC+PC | Metabolite        |            |                        |          |                                                 |             |                                   |      |                    |       |           |      |           |               |            |     |       |     |       |     |       |     |       |      |       |     |       |     |       |     |       |      |       |     |       |      |       |     |       |     |       |     |       |     |       |     |       |     |       |      |          |      |         |        |       |     |       |     |       |      |       |        |       |     |       |         |       |    |       |          |       |     |       |        |       |     |       |         |                                                                                                                                                                                                                                                                                                                                                                                                                                                                                                            |            |           |        |           |            |            |           |              |             |            |                                          |                 |                                                  |                          |
| 0.000                                                                                                                                                                                                                                                                                                                                                                                                                                                                                                                                                                                                                                                                                                                                                                                                                                                                                                                                                                                                                                                                                                                                                                                                                                                                                                                              | 999%                 | 0.000   | Ala               |            |                        |          |                                                 |             |                                   |      |                    |       |           |      |           |               |            |     |       |     |       |     |       |     |       |      |       |     |       |     |       |     |       |      |       |     |       |      |       |     |       |     |       |     |       |     |       |     |       |     |       |      |          |      |         |        |       |     |       |     |       |      |       |        |       |     |       |         |       |    |       |          |       |     |       |        |       |     |       |         |                                                                                                                                                                                                                                                                                                                                                                                                                                                                                                            |            |           |        |           |            |            |           |              |             |            |                                          |                 |                                                  |                          |
| 2.388                                                                                                                                                                                                                                                                                                                                                                                                                                                                                                                                                                                                                                                                                                                                                                                                                                                                                                                                                                                                                                                                                                                                                                                                                                                                                                                              | 41%                  | 2.034   | Cr                |            |                        |          |                                                 |             |                                   |      |                    |       |           |      |           |               |            |     |       |     |       |     |       |     |       |      |       |     |       |     |       |     |       |      |       |     |       |      |       |     |       |     |       |     |       |     |       |     |       |     |       |      |          |      |         |        |       |     |       |     |       |      |       |        |       |     |       |         |       |    |       |          |       |     |       |        |       |     |       |         |                                                                                                                                                                                                                                                                                                                                                                                                                                                                                                            |            |           |        |           |            |            |           |              |             |            |                                          |                 |                                                  |                          |
| 7.26E-02                                                                                                                                                                                                                                                                                                                                                                                                                                                                                                                                                                                                                                                                                                                                                                                                                                                                                                                                                                                                                                                                                                                                                                                                                                                                                                                           | 999%                 | 6.2E-02 | PCr               |            |                        |          |                                                 |             |                                   |      |                    |       |           |      |           |               |            |     |       |     |       |     |       |     |       |      |       |     |       |     |       |     |       |      |       |     |       |      |       |     |       |     |       |     |       |     |       |     |       |     |       |      |          |      |         |        |       |     |       |     |       |      |       |        |       |     |       |         |       |    |       |          |       |     |       |        |       |     |       |         |                                                                                                                                                                                                                                                                                                                                                                                                                                                                                                            |            |           |        |           |            |            |           |              |             |            |                                          |                 |                                                  |                          |
| 5.050                                                                                                                                                                                                                                                                                                                                                                                                                                                                                                                                                                                                                                                                                                                                                                                                                                                                                                                                                                                                                                                                                                                                                                                                                                                                                                                              | 29%                  | 4.301   | Gln               |            |                        |          |                                                 |             |                                   |      |                    |       |           |      |           |               |            |     |       |     |       |     |       |     |       |      |       |     |       |     |       |     |       |      |       |     |       |      |       |     |       |     |       |     |       |     |       |     |       |     |       |      |          |      |         |        |       |     |       |     |       |      |       |        |       |     |       |         |       |    |       |          |       |     |       |        |       |     |       |         |                                                                                                                                                                                                                                                                                                                                                                                                                                                                                                            |            |           |        |           |            |            |           |              |             |            |                                          |                 |                                                  |                          |
| 2.632                                                                                                                                                                                                                                                                                                                                                                                                                                                                                                                                                                                                                                                                                                                                                                                                                                                                                                                                                                                                                                                                                                                                                                                                                                                                                                                              | 54%                  | 2.242   | Glu               |            |                        |          |                                                 |             |                                   |      |                    |       |           |      |           |               |            |     |       |     |       |     |       |     |       |      |       |     |       |     |       |     |       |      |       |     |       |      |       |     |       |     |       |     |       |     |       |     |       |     |       |      |          |      |         |        |       |     |       |     |       |      |       |        |       |     |       |         |       |    |       |          |       |     |       |        |       |     |       |         |                                                                                                                                                                                                                                                                                                                                                                                                                                                                                                            |            |           |        |           |            |            |           |              |             |            |                                          |                 |                                                  |                          |
| 0.000                                                                                                                                                                                                                                                                                                                                                                                                                                                                                                                                                                                                                                                                                                                                                                                                                                                                                                                                                                                                                                                                                                                                                                                                                                                                                                                              | 999%                 | 0.000   | GPC               |            |                        |          |                                                 |             |                                   |      |                    |       |           |      |           |               |            |     |       |     |       |     |       |     |       |      |       |     |       |     |       |     |       |      |       |     |       |      |       |     |       |     |       |     |       |     |       |     |       |     |       |      |          |      |         |        |       |     |       |     |       |      |       |        |       |     |       |         |       |    |       |          |       |     |       |        |       |     |       |         |                                                                                                                                                                                                                                                                                                                                                                                                                                                                                                            |            |           |        |           |            |            |           |              |             |            |                                          |                 |                                                  |                          |
| 1.174                                                                                                                                                                                                                                                                                                                                                                                                                                                                                                                                                                                                                                                                                                                                                                                                                                                                                                                                                                                                                                                                                                                                                                                                                                                                                                                              | 12%                  | 1.000   | PCh               |            |                        |          |                                                 |             |                                   |      |                    |       |           |      |           |               |            |     |       |     |       |     |       |     |       |      |       |     |       |     |       |     |       |      |       |     |       |      |       |     |       |     |       |     |       |     |       |     |       |     |       |      |          |      |         |        |       |     |       |     |       |      |       |        |       |     |       |         |       |    |       |          |       |     |       |        |       |     |       |         |                                                                                                                                                                                                                                                                                                                                                                                                                                                                                                            |            |           |        |           |            |            |           |              |             |            |                                          |                 |                                                  |                          |
| 0.291                                                                                                                                                                                                                                                                                                                                                                                                                                                                                                                                                                                                                                                                                                                                                                                                                                                                                                                                                                                                                                                                                                                                                                                                                                                                                                                              | 174%                 | 0.248   | GSH               |            |                        |          |                                                 |             |                                   |      |                    |       |           |      |           |               |            |     |       |     |       |     |       |     |       |      |       |     |       |     |       |     |       |      |       |     |       |      |       |     |       |     |       |     |       |     |       |     |       |     |       |      |          |      |         |        |       |     |       |     |       |      |       |        |       |     |       |         |       |    |       |          |       |     |       |        |       |     |       |         |                                                                                                                                                                                                                                                                                                                                                                                                                                                                                                            |            |           |        |           |            |            |           |              |             |            |                                          |                 |                                                  |                          |
| 0.000                                                                                                                                                                                                                                                                                                                                                                                                                                                                                                                                                                                                                                                                                                                                                                                                                                                                                                                                                                                                                                                                                                                                                                                                                                                                                                                              | 999%                 | 0.000   | Ins               |            |                        |          |                                                 |             |                                   |      |                    |       |           |      |           |               |            |     |       |     |       |     |       |     |       |      |       |     |       |     |       |     |       |      |       |     |       |      |       |     |       |     |       |     |       |     |       |     |       |     |       |      |          |      |         |        |       |     |       |     |       |      |       |        |       |     |       |         |       |    |       |          |       |     |       |        |       |     |       |         |                                                                                                                                                                                                                                                                                                                                                                                                                                                                                                            |            |           |        |           |            |            |           |              |             |            |                                          |                 |                                                  |                          |
| 4.465                                                                                                                                                                                                                                                                                                                                                                                                                                                                                                                                                                                                                                                                                                                                                                                                                                                                                                                                                                                                                                                                                                                                                                                                                                                                                                                              | 18%                  | 3.804   | Lac               |            |                        |          |                                                 |             |                                   |      |                    |       |           |      |           |               |            |     |       |     |       |     |       |     |       |      |       |     |       |     |       |     |       |      |       |     |       |      |       |     |       |     |       |     |       |     |       |     |       |     |       |      |          |      |         |        |       |     |       |     |       |      |       |        |       |     |       |         |       |    |       |          |       |     |       |        |       |     |       |         |                                                                                                                                                                                                                                                                                                                                                                                                                                                                                                            |            |           |        |           |            |            |           |              |             |            |                                          |                 |                                                  |                          |
| 4.134                                                                                                                                                                                                                                                                                                                                                                                                                                                                                                                                                                                                                                                                                                                                                                                                                                                                                                                                                                                                                                                                                                                                                                                                                                                                                                                              | 11%                  | 3.521   | NAA               |            |                        |          |                                                 |             |                                   |      |                    |       |           |      |           |               |            |     |       |     |       |     |       |     |       |      |       |     |       |     |       |     |       |      |       |     |       |      |       |     |       |     |       |     |       |     |       |     |       |     |       |      |          |      |         |        |       |     |       |     |       |      |       |        |       |     |       |         |       |    |       |          |       |     |       |        |       |     |       |         |                                                                                                                                                                                                                                                                                                                                                                                                                                                                                                            |            |           |        |           |            |            |           |              |             |            |                                          |                 |                                                  |                          |
| 1.006                                                                                                                                                                                                                                                                                                                                                                                                                                                                                                                                                                                                                                                                                                                                                                                                                                                                                                                                                                                                                                                                                                                                                                                                                                                                                                                              | 38%                  | 0.857   | NAAG              |            |                        |          |                                                 |             |                                   |      |                    |       |           |      |           |               |            |     |       |     |       |     |       |     |       |      |       |     |       |     |       |     |       |      |       |     |       |      |       |     |       |     |       |     |       |     |       |     |       |     |       |      |          |      |         |        |       |     |       |     |       |      |       |        |       |     |       |         |       |    |       |          |       |     |       |        |       |     |       |         |                                                                                                                                                                                                                                                                                                                                                                                                                                                                                                            |            |           |        |           |            |            |           |              |             |            |                                          |                 |                                                  |                          |
| 5.77E-02                                                                                                                                                                                                                                                                                                                                                                                                                                                                                                                                                                                                                                                                                                                                                                                                                                                                                                                                                                                                                                                                                                                                                                                                                                                                                                                           | 170%                 | 4.9E-02 | Scyllo            |            |                        |          |                                                 |             |                                   |      |                    |       |           |      |           |               |            |     |       |     |       |     |       |     |       |      |       |     |       |     |       |     |       |      |       |     |       |      |       |     |       |     |       |     |       |     |       |     |       |     |       |      |          |      |         |        |       |     |       |     |       |      |       |        |       |     |       |         |       |    |       |          |       |     |       |        |       |     |       |         |                                                                                                                                                                                                                                                                                                                                                                                                                                                                                                            |            |           |        |           |            |            |           |              |             |            |                                          |                 |                                                  |                          |
| 0.931                                                                                                                                                                                                                                                                                                                                                                                                                                                                                                                                                                                                                                                                                                                                                                                                                                                                                                                                                                                                                                                                                                                                                                                                                                                                                                                              | 52%                  | 0.793   | Tau               |            |                        |          |                                                 |             |                                   |      |                    |       |           |      |           |               |            |     |       |     |       |     |       |     |       |      |       |     |       |     |       |     |       |      |       |     |       |      |       |     |       |     |       |     |       |     |       |     |       |     |       |      |          |      |         |        |       |     |       |     |       |      |       |        |       |     |       |         |       |    |       |          |       |     |       |        |       |     |       |         |                                                                                                                                                                                                                                                                                                                                                                                                                                                                                                            |            |           |        |           |            |            |           |              |             |            |                                          |                 |                                                  |                          |
| 0.366                                                                                                                                                                                                                                                                                                                                                                                                                                                                                                                                                                                                                                                                                                                                                                                                                                                                                                                                                                                                                                                                                                                                                                                                                                                                                                                              | 132%                 | 0.312   | -CrCH2            |            |                        |          |                                                 |             |                                   |      |                    |       |           |      |           |               |            |     |       |     |       |     |       |     |       |      |       |     |       |     |       |     |       |      |       |     |       |      |       |     |       |     |       |     |       |     |       |     |       |     |       |      |          |      |         |        |       |     |       |     |       |      |       |        |       |     |       |         |       |    |       |          |       |     |       |        |       |     |       |         |                                                                                                                                                                                                                                                                                                                                                                                                                                                                                                            |            |           |        |           |            |            |           |              |             |            |                                          |                 |                                                  |                          |
| 1.174                                                                                                                                                                                                                                                                                                                                                                                                                                                                                                                                                                                                                                                                                                                                                                                                                                                                                                                                                                                                                                                                                                                                                                                                                                                                                                                              | 12%                  | 1.000   | GPC+PCh           |            |                        |          |                                                 |             |                                   |      |                    |       |           |      |           |               |            |     |       |     |       |     |       |     |       |      |       |     |       |     |       |     |       |      |       |     |       |      |       |     |       |     |       |     |       |     |       |     |       |     |       |      |          |      |         |        |       |     |       |     |       |      |       |        |       |     |       |         |       |    |       |          |       |     |       |        |       |     |       |         |                                                                                                                                                                                                                                                                                                                                                                                                                                                                                                            |            |           |        |           |            |            |           |              |             |            |                                          |                 |                                                  |                          |
| 5.140                                                                                                                                                                                                                                                                                                                                                                                                                                                                                                                                                                                                                                                                                                                                                                                                                                                                                                                                                                                                                                                                                                                                                                                                                                                                                                                              | 9%                   | 4.378   | NAA+NAAG          |            |                        |          |                                                 |             |                                   |      |                    |       |           |      |           |               |            |     |       |     |       |     |       |     |       |      |       |     |       |     |       |     |       |      |       |     |       |      |       |     |       |     |       |     |       |     |       |     |       |     |       |      |          |      |         |        |       |     |       |     |       |      |       |        |       |     |       |         |       |    |       |          |       |     |       |        |       |     |       |         |                                                                                                                                                                                                                                                                                                                                                                                                                                                                                                            |            |           |        |           |            |            |           |              |             |            |                                          |                 |                                                  |                          |
| 2.461                                                                                                                                                                                                                                                                                                                                                                                                                                                                                                                                                                                                                                                                                                                                                                                                                                                                                                                                                                                                                                                                                                                                                                                                                                                                                                                              | 15%                  | 2.096   | Cr+PCr            |            |                        |          |                                                 |             |                                   |      |                    |       |           |      |           |               |            |     |       |     |       |     |       |     |       |      |       |     |       |     |       |     |       |      |       |     |       |      |       |     |       |     |       |     |       |     |       |     |       |     |       |      |          |      |         |        |       |     |       |     |       |      |       |        |       |     |       |         |       |    |       |          |       |     |       |        |       |     |       |         |                                                                                                                                                                                                                                                                                                                                                                                                                                                                                                            |            |           |        |           |            |            |           |              |             |            |                                          |                 |                                                  |                          |
| 7.682                                                                                                                                                                                                                                                                                                                                                                                                                                                                                                                                                                                                                                                                                                                                                                                                                                                                                                                                                                                                                                                                                                                                                                                                                                                                                                                              | 19%                  | 6.543   | Glu+Gln           |            |                        |          |                                                 |             |                                   |      |                    |       |           |      |           |               |            |     |       |     |       |     |       |     |       |      |       |     |       |     |       |     |       |      |       |     |       |      |       |     |       |     |       |     |       |     |       |     |       |     |       |      |          |      |         |        |       |     |       |     |       |      |       |        |       |     |       |         |       |    |       |          |       |     |       |        |       |     |       |         |                                                                                                                                                                                                                                                                                                                                                                                                                                                                                                            |            |           |        |           |            |            |           |              |             |            |                                          |                 |                                                  |                          |
| irowst= 10                                                                                                                                                                                                                                                                                                                                                                                                                                                                                                                                                                                                                                                                                                                                                                                                                                                                                                                                                                                                                                                                                                                                                                                                                                                                                                                         |                      |         |                   |            |                        |          |                                                 |             |                                   |      |                    |       |           |      |           |               |            |     |       |     |       |     |       |     |       |      |       |     |       |     |       |     |       |      |       |     |       |      |       |     |       |     |       |     |       |     |       |     |       |     |       |      |          |      |         |        |       |     |       |     |       |      |       |        |       |     |       |         |       |    |       |          |       |     |       |        |       |     |       |         |                                                                                                                                                                                                                                                                                                                                                                                                                                                                                                            |            |           |        |           |            |            |           |              |             |            |                                          |                 |                                                  |                          |
| islice= 1                                                                                                                                                                                                                                                                                                                                                                                                                                                                                                                                                                                                                                                                                                                                                                                                                                                                                                                                                                                                                                                                                                                                                                                                                                                                                                                          |                      |         |                   |            |                        |          |                                                 |             |                                   |      |                    |       |           |      |           |               |            |     |       |     |       |     |       |     |       |      |       |     |       |     |       |     |       |      |       |     |       |      |       |     |       |     |       |     |       |     |       |     |       |     |       |      |          |      |         |        |       |     |       |     |       |      |       |        |       |     |       |         |       |    |       |          |       |     |       |        |       |     |       |         |                                                                                                                                                                                                                                                                                                                                                                                                                                                                                                            |            |           |        |           |            |            |           |              |             |            |                                          |                 |                                                  |                          |
| lps= 8                                                                                                                                                                                                                                                                                                                                                                                                                                                                                                                                                                                                                                                                                                                                                                                                                                                                                                                                                                                                                                                                                                                                                                                                                                                                                                                             |                      |         |                   |            |                        |          |                                                 |             |                                   |      |                    |       |           |      |           |               |            |     |       |     |       |     |       |     |       |      |       |     |       |     |       |     |       |      |       |     |       |      |       |     |       |     |       |     |       |     |       |     |       |     |       |      |          |      |         |        |       |     |       |     |       |      |       |        |       |     |       |         |       |    |       |          |       |     |       |        |       |     |       |         |                                                                                                                                                                                                                                                                                                                                                                                                                                                                                                            |            |           |        |           |            |            |           |              |             |            |                                          |                 |                                                  |                          |
| ltable= 7                                                                                                                                                                                                                                                                                                                                                                                                                                                                                                                                                                                                                                                                                                                                                                                                                                                                                                                                                                                                                                                                                                                                                                                                                                                                                                                          |                      |         |                   |            |                        |          |                                                 |             |                                   |      |                    |       |           |      |           |               |            |     |       |     |       |     |       |     |       |      |       |     |       |     |       |     |       |      |       |     |       |      |       |     |       |     |       |     |       |     |       |     |       |     |       |      |          |      |         |        |       |     |       |     |       |      |       |        |       |     |       |         |       |    |       |          |       |     |       |        |       |     |       |         |                                                                                                                                                                                                                                                                                                                                                                                                                                                                                                            |            |           |        |           |            |            |           |              |             |            |                                          |                 |                                                  |                          |
| ndcols= 16                                                                                                                                                                                                                                                                                                                                                                                                                                                                                                                                                                                                                                                                                                                                                                                                                                                                                                                                                                                                                                                                                                                                                                                                                                                                                                                         |                      |         |                   |            |                        |          |                                                 |             |                                   |      |                    |       |           |      |           |               |            |     |       |     |       |     |       |     |       |      |       |     |       |     |       |     |       |      |       |     |       |      |       |     |       |     |       |     |       |     |       |     |       |     |       |      |          |      |         |        |       |     |       |     |       |      |       |        |       |     |       |         |       |    |       |          |       |     |       |        |       |     |       |         |                                                                                                                                                                                                                                                                                                                                                                                                                                                                                                            |            |           |        |           |            |            |           |              |             |            |                                          |                 |                                                  |                          |
| ndrows= 20                                                                                                                                                                                                                                                                                                                                                                                                                                                                                                                                                                                                                                                                                                                                                                                                                                                                                                                                                                                                                                                                                                                                                                                                                                                                                                                         |                      |         |                   |            |                        |          |                                                 |             |                                   |      |                    |       |           |      |           |               |            |     |       |     |       |     |       |     |       |      |       |     |       |     |       |     |       |      |       |     |       |      |       |     |       |     |       |     |       |     |       |     |       |     |       |      |          |      |         |        |       |     |       |     |       |      |       |        |       |     |       |         |       |    |       |          |       |     |       |        |       |     |       |         |                                                                                                                                                                                                                                                                                                                                                                                                                                                                                                            |            |           |        |           |            |            |           |              |             |            |                                          |                 |                                                  |                          |
| ndslic= 1                                                                                                                                                                                                                                                                                                                                                                                                                                                                                                                                                                                                                                                                                                                                                                                                                                                                                                                                                                                                                                                                                                                                                                                                                                                                                                                          |                      |         |                   |            |                        |          |                                                 |             |                                   |      |                    |       |           |      |           |               |            |     |       |     |       |     |       |     |       |      |       |     |       |     |       |     |       |      |       |     |       |      |       |     |       |     |       |     |       |     |       |     |       |     |       |      |          |      |         |        |       |     |       |     |       |      |       |        |       |     |       |         |       |    |       |          |       |     |       |        |       |     |       |         |                                                                                                                                                                                                                                                                                                                                                                                                                                                                                                            |            |           |        |           |            |            |           |              |             |            |                                          |                 |                                                  |                          |
| nunfil= 1024                                                                                                                                                                                                                                                                                                                                                                                                                                                                                                                                                                                                                                                                                                                                                                                                                                                                                                                                                                                                                                                                                                                                                                                                                                                                                                                       |                      |         |                   |            |                        |          |                                                 |             |                                   |      |                    |       |           |      |           |               |            |     |       |     |       |     |       |     |       |      |       |     |       |     |       |     |       |      |       |     |       |      |       |     |       |     |       |     |       |     |       |     |       |     |       |      |          |      |         |        |       |     |       |     |       |      |       |        |       |     |       |         |       |    |       |          |       |     |       |        |       |     |       |         |                                                                                                                                                                                                                                                                                                                                                                                                                                                                                                            |            |           |        |           |            |            |           |              |             |            |                                          |                 |                                                  |                          |
| ppmend= 1.0                                                                                                                                                                                                                                                                                                                                                                                                                                                                                                                                                                                                                                                                                                                                                                                                                                                                                                                                                                                                                                                                                                                                                                                                                                                                                                                        |                      |         |                   |            |                        |          |                                                 |             |                                   |      |                    |       |           |      |           |               |            |     |       |     |       |     |       |     |       |      |       |     |       |     |       |     |       |      |       |     |       |      |       |     |       |     |       |     |       |     |       |     |       |     |       |      |          |      |         |        |       |     |       |     |       |      |       |        |       |     |       |         |       |    |       |          |       |     |       |        |       |     |       |         |                                                                                                                                                                                                                                                                                                                                                                                                                                                                                                            |            |           |        |           |            |            |           |              |             |            |                                          |                 |                                                  |                          |
| ppmst= 4.0                                                                                                                                                                                                                                                                                                                                                                                                                                                                                                                                                                                                                                                                                                                                                                                                                                                                                                                                                                                                                                                                                                                                                                                                                                                                                                                         |                      |         |                   |            |                        |          |                                                 |             |                                   |      |                    |       |           |      |           |               |            |     |       |     |       |     |       |     |       |      |       |     |       |     |       |     |       |      |       |     |       |      |       |     |       |     |       |     |       |     |       |     |       |     |       |      |          |      |         |        |       |     |       |     |       |      |       |        |       |     |       |         |       |    |       |          |       |     |       |        |       |     |       |         |                                                                                                                                                                                                                                                                                                                                                                                                                                                                                                            |            |           |        |           |            |            |           |              |             |            |                                          |                 |                                                  |                          |
| savdir= '/home/stu11733/.lcmode1/saved/'                                                                                                                                                                                                                                                                                                                                                                                                                                                                                                                                                                                                                                                                                                                                                                                                                                                                                                                                                                                                                                                                                                                                                                                                                                                                                           |                      |         |                   |            |                        |          |                                                 |             |                                   |      |                    |       |           |      |           |               |            |     |       |     |       |     |       |     |       |      |       |     |       |     |       |     |       |      |       |     |       |      |       |     |       |     |       |     |       |     |       |     |       |     |       |      |          |      |         |        |       |     |       |     |       |      |       |        |       |     |       |         |       |    |       |          |       |     |       |        |       |     |       |         |                                                                                                                                                                                                                                                                                                                                                                                                                                                                                                            |            |           |        |           |            |            |           |              |             |            |                                          |                 |                                                  |                          |
| sptype= 'tumor'                                                                                                                                                                                                                                                                                                                                                                                                                                                                                                                                                                                                                                                                                                                                                                                                                                                                                                                                                                                                                                                                                                                                                                                                                                                                                                                    |                      |         |                   |            |                        |          |                                                 |             |                                   |      |                    |       |           |      |           |               |            |     |       |     |       |     |       |     |       |      |       |     |       |     |       |     |       |      |       |     |       |      |       |     |       |     |       |     |       |     |       |     |       |     |       |      |          |      |         |        |       |     |       |     |       |      |       |        |       |     |       |         |       |    |       |          |       |     |       |        |       |     |       |         |                                                                                                                                                                                                                                                                                                                                                                                                                                                                                                            |            |           |        |           |            |            |           |              |             |            |                                          |                 |                                                  |                          |
| srcraw= '/home/data/Studies/GBM_Spektro/data/s11                                                                                                                                                                                                                                                                                                                                                                                                                                                                                                                                                                                                                                                                                                                                                                                                                                                                                                                                                                                                                                                                                                                                                                                                                                                                                   |                      |         |                   |            |                        |          |                                                 |             |                                   |      |                    |       |           |      |           |               |            |     |       |     |       |     |       |     |       |      |       |     |       |     |       |     |       |      |       |     |       |      |       |     |       |     |       |     |       |     |       |     |       |     |       |      |          |      |         |        |       |     |       |     |       |      |       |        |       |     |       |         |       |    |       |          |       |     |       |        |       |     |       |         |                                                                                                                                                                                                                                                                                                                                                                                                                                                                                                            |            |           |        |           |            |            |           |              |             |            |                                          |                 |                                                  |                          |
| /DBIEX_5_1_raw_act.SDAT'                                                                                                                                                                                                                                                                                                                                                                                                                                                                                                                                                                                                                                                                                                                                                                                                                                                                                                                                                                                                                                                                                                                                                                                                                                                                                                           |                      |         |                   |            |                        |          |                                                 |             |                                   |      |                    |       |           |      |           |               |            |     |       |     |       |     |       |     |       |      |       |     |       |     |       |     |       |      |       |     |       |      |       |     |       |     |       |     |       |     |       |     |       |     |       |      |          |      |         |        |       |     |       |     |       |      |       |        |       |     |       |         |       |    |       |          |       |     |       |        |       |     |       |         |                                                                                                                                                                                                                                                                                                                                                                                                                                                                                                            |            |           |        |           |            |            |           |              |             |            |                                          |                 |                                                  |                          |
| <table><tr><td>0.153</td><td>999%</td><td>0.130</td><td>Lip13a</td></tr><tr><td>0.000</td><td>999%</td><td>0.000</td><td>Lip13b</td></tr><tr><td>2.29E-02</td><td>999%</td><td>2.0E-02</td><td>Lip20</td></tr><tr><td>0.153</td><td>999%</td><td>0.130</td><td>Lip13a+Lip13b</td></tr></table>                                                                                                                                                                                                                                                                                                                                                                                                                                                                                                                                                                                                                                                                                                                                                                                                                                                                                                                                                                                                                                     | 0.153                | 999%    | 0.130             | Lip13a     | 0.000                  | 999%     | 0.000                                           | Lip13b      | 2.29E-02                          | 999% | 2.0E-02            | Lip20 | 0.153     | 999% | 0.130     | Lip13a+Lip13b |            |     |       |     |       |     |       |     |       |      |       |     |       |     |       |     |       |      |       |     |       |      |       |     |       |     |       |     |       |     |       |     |       |     |       |      |          |      |         |        |       |     |       |     |       |      |       |        |       |     |       |         |       |    |       |          |       |     |       |        |       |     |       |         |                                                                                                                                                                                                                                                                                                                                                                                                                                                                                                            |            |           |        |           |            |            |           |              |             |            |                                          |                 |                                                  |                          |
| 0.153                                                                                                                                                                                                                                                                                                                                                                                                                                                                                                                                                                                                                                                                                                                                                                                                                                                                                                                                                                                                                                                                                                                                                                                                                                                                                                                              | 999%                 | 0.130   | Lip13a            |            |                        |          |                                                 |             |                                   |      |                    |       |           |      |           |               |            |     |       |     |       |     |       |     |       |      |       |     |       |     |       |     |       |      |       |     |       |      |       |     |       |     |       |     |       |     |       |     |       |     |       |      |          |      |         |        |       |     |       |     |       |      |       |        |       |     |       |         |       |    |       |          |       |     |       |        |       |     |       |         |                                                                                                                                                                                                                                                                                                                                                                                                                                                                                                            |            |           |        |           |            |            |           |              |             |            |                                          |                 |                                                  |                          |
| 0.000                                                                                                                                                                                                                                                                                                                                                                                                                                                                                                                                                                                                                                                                                                                                                                                                                                                                                                                                                                                                                                                                                                                                                                                                                                                                                                                              | 999%                 | 0.000   | Lip13b            |            |                        |          |                                                 |             |                                   |      |                    |       |           |      |           |               |            |     |       |     |       |     |       |     |       |      |       |     |       |     |       |     |       |      |       |     |       |      |       |     |       |     |       |     |       |     |       |     |       |     |       |      |          |      |         |        |       |     |       |     |       |      |       |        |       |     |       |         |       |    |       |          |       |     |       |        |       |     |       |         |                                                                                                                                                                                                                                                                                                                                                                                                                                                                                                            |            |           |        |           |            |            |           |              |             |            |                                          |                 |                                                  |                          |
| 2.29E-02                                                                                                                                                                                                                                                                                                                                                                                                                                                                                                                                                                                                                                                                                                                                                                                                                                                                                                                                                                                                                                                                                                                                                                                                                                                                                                                           | 999%                 | 2.0E-02 | Lip20             |            |                        |          |                                                 |             |                                   |      |                    |       |           |      |           |               |            |     |       |     |       |     |       |     |       |      |       |     |       |     |       |     |       |      |       |     |       |      |       |     |       |     |       |     |       |     |       |     |       |     |       |      |          |      |         |        |       |     |       |     |       |      |       |        |       |     |       |         |       |    |       |          |       |     |       |        |       |     |       |         |                                                                                                                                                                                                                                                                                                                                                                                                                                                                                                            |            |           |        |           |            |            |           |              |             |            |                                          |                 |                                                  |                          |
| 0.153                                                                                                                                                                                                                                                                                                                                                                                                                                                                                                                                                                                                                                                                                                                                                                                                                                                                                                                                                                                                                                                                                                                                                                                                                                                                                                                              | 999%                 | 0.130   | Lip13a+Lip13b     |            |                        |          |                                                 |             |                                   |      |                    |       |           |      |           |               |            |     |       |     |       |     |       |     |       |      |       |     |       |     |       |     |       |      |       |     |       |      |       |     |       |     |       |     |       |     |       |     |       |     |       |      |          |      |         |        |       |     |       |     |       |      |       |        |       |     |       |         |       |    |       |          |       |     |       |        |       |     |       |         |                                                                                                                                                                                                                                                                                                                                                                                                                                                                                                            |            |           |        |           |            |            |           |              |             |            |                                          |                 |                                                  |                          |
| <table><tr><th colspan="2">DIAGNOSTICS</th></tr><tr><td>12 info's</td><td>RFALSI 11</td></tr><tr><td>2 info's</td><td>RFALSI 4</td></tr><tr><td>1 info</td><td>RFALSI 12</td></tr></table>                                                                                                                                                                                                                                                                                                                                                                                                                                                                                                                                                                                                                                                                                                                                                                                                                                                                                                                                                                                                                                                                                                                                         | DIAGNOSTICS          |         | 12 info's         | RFALSI 11  | 2 info's               | RFALSI 4 | 1 info                                          | RFALSI 12   |                                   |      |                    |       |           |      |           |               |            |     |       |     |       |     |       |     |       |      |       |     |       |     |       |     |       |      |       |     |       |      |       |     |       |     |       |     |       |     |       |     |       |     |       |      |          |      |         |        |       |     |       |     |       |      |       |        |       |     |       |         |       |    |       |          |       |     |       |        |       |     |       |         |                                                                                                                                                                                                                                                                                                                                                                                                                                                                                                            |            |           |        |           |            |            |           |              |             |            |                                          |                 |                                                  |                          |
| DIAGNOSTICS                                                                                                                                                                                                                                                                                                                                                                                                                                                                                                                                                                                                                                                                                                                                                                                                                                                                                                                                                                                                                                                                                                                                                                                                                                                                                                                        |                      |         |                   |            |                        |          |                                                 |             |                                   |      |                    |       |           |      |           |               |            |     |       |     |       |     |       |     |       |      |       |     |       |     |       |     |       |      |       |     |       |      |       |     |       |     |       |     |       |     |       |     |       |     |       |      |          |      |         |        |       |     |       |     |       |      |       |        |       |     |       |         |       |    |       |          |       |     |       |        |       |     |       |         |                                                                                                                                                                                                                                                                                                                                                                                                                                                                                                            |            |           |        |           |            |            |           |              |             |            |                                          |                 |                                                  |                          |
| 12 info's                                                                                                                                                                                                                                                                                                                                                                                                                                                                                                                                                                                                                                                                                                                                                                                                                                                                                                                                                                                                                                                                                                                                                                                                                                                                                                                          | RFALSI 11            |         |                   |            |                        |          |                                                 |             |                                   |      |                    |       |           |      |           |               |            |     |       |     |       |     |       |     |       |      |       |     |       |     |       |     |       |      |       |     |       |      |       |     |       |     |       |     |       |     |       |     |       |     |       |      |          |      |         |        |       |     |       |     |       |      |       |        |       |     |       |         |       |    |       |          |       |     |       |        |       |     |       |         |                                                                                                                                                                                                                                                                                                                                                                                                                                                                                                            |            |           |        |           |            |            |           |              |             |            |                                          |                 |                                                  |                          |
| 2 info's                                                                                                                                                                                                                                                                                                                                                                                                                                                                                                                                                                                                                                                                                                                                                                                                                                                                                                                                                                                                                                                                                                                                                                                                                                                                                                                           | RFALSI 4             |         |                   |            |                        |          |                                                 |             |                                   |      |                    |       |           |      |           |               |            |     |       |     |       |     |       |     |       |      |       |     |       |     |       |     |       |      |       |     |       |      |       |     |       |     |       |     |       |     |       |     |       |     |       |      |          |      |         |        |       |     |       |     |       |      |       |        |       |     |       |         |       |    |       |          |       |     |       |        |       |     |       |         |                                                                                                                                                                                                                                                                                                                                                                                                                                                                                                            |            |           |        |           |            |            |           |              |             |            |                                          |                 |                                                  |                          |
| 1 info                                                                                                                                                                                                                                                                                                                                                                                                                                                                                                                                                                                                                                                                                                                                                                                                                                                                                                                                                                                                                                                                                                                                                                                                                                                                                                                             | RFALSI 12            |         |                   |            |                        |          |                                                 |             |                                   |      |                    |       |           |      |           |               |            |     |       |     |       |     |       |     |       |      |       |     |       |     |       |     |       |      |       |     |       |      |       |     |       |     |       |     |       |     |       |     |       |     |       |      |          |      |         |        |       |     |       |     |       |      |       |        |       |     |       |         |       |    |       |          |       |     |       |        |       |     |       |         |                                                                                                                                                                                                                                                                                                                                                                                                                                                                                                            |            |           |        |           |            |            |           |              |             |            |                                          |                 |                                                  |                          |
| <table><tr><th colspan="2">MISCELLANEOUS OUTPUT</th></tr><tr><td>FWHM = 0.046 ppm</td><td>S/N = 3</td></tr><tr><td>Data shift = 0.000 ppm</td><td></td></tr><tr><td>Ph: -6 deg</td><td>2.1 deg/ppm</td></tr></table>                                                                                                                                                                                                                                                                                                                                                                                                                                                                                                                                                                                                                                                                                                                                                                                                                                                                                                                                                                                                                                                                                                               | MISCELLANEOUS OUTPUT |         | FWHM = 0.046 ppm  | S/N = 3    | Data shift = 0.000 ppm |          | Ph: -6 deg                                      | 2.1 deg/ppm |                                   |      |                    |       |           |      |           |               |            |     |       |     |       |     |       |     |       |      |       |     |       |     |       |     |       |      |       |     |       |      |       |     |       |     |       |     |       |     |       |     |       |     |       |      |          |      |         |        |       |     |       |     |       |      |       |        |       |     |       |         |       |    |       |          |       |     |       |        |       |     |       |         |                                                                                                                                                                                                                                                                                                                                                                                                                                                                                                            |            |           |        |           |            |            |           |              |             |            |                                          |                 |                                                  |                          |
| MISCELLANEOUS OUTPUT                                                                                                                                                                                                                                                                                                                                                                                                                                                                                                                                                                                                                                                                                                                                                                                                                                                                                                                                                                                                                                                                                                                                                                                                                                                                                                               |                      |         |                   |            |                        |          |                                                 |             |                                   |      |                    |       |           |      |           |               |            |     |       |     |       |     |       |     |       |      |       |     |       |     |       |     |       |      |       |     |       |      |       |     |       |     |       |     |       |     |       |     |       |     |       |      |          |      |         |        |       |     |       |     |       |      |       |        |       |     |       |         |       |    |       |          |       |     |       |        |       |     |       |         |                                                                                                                                                                                                                                                                                                                                                                                                                                                                                                            |            |           |        |           |            |            |           |              |             |            |                                          |                 |                                                  |                          |
| FWHM = 0.046 ppm                                                                                                                                                                                                                                                                                                                                                                                                                                                                                                                                                                                                                                                                                                                                                                                                                                                                                                                                                                                                                                                                                                                                                                                                                                                                                                                   | S/N = 3              |         |                   |            |                        |          |                                                 |             |                                   |      |                    |       |           |      |           |               |            |     |       |     |       |     |       |     |       |      |       |     |       |     |       |     |       |      |       |     |       |      |       |     |       |     |       |     |       |     |       |     |       |     |       |      |          |      |         |        |       |     |       |     |       |      |       |        |       |     |       |         |       |    |       |          |       |     |       |        |       |     |       |         |                                                                                                                                                                                                                                                                                                                                                                                                                                                                                                            |            |           |        |           |            |            |           |              |             |            |                                          |                 |                                                  |                          |
| Data shift = 0.000 ppm                                                                                                                                                                                                                                                                                                                                                                                                                                                                                                                                                                                                                                                                                                                                                                                                                                                                                                                                                                                                                                                                                                                                                                                                                                                                                                             |                      |         |                   |            |                        |          |                                                 |             |                                   |      |                    |       |           |      |           |               |            |     |       |     |       |     |       |     |       |      |       |     |       |     |       |     |       |      |       |     |       |      |       |     |       |     |       |     |       |     |       |     |       |     |       |      |          |      |         |        |       |     |       |     |       |      |       |        |       |     |       |         |       |    |       |          |       |     |       |        |       |     |       |         |                                                                                                                                                                                                                                                                                                                                                                                                                                                                                                            |            |           |        |           |            |            |           |              |             |            |                                          |                 |                                                  |                          |
| Ph: -6 deg                                                                                                                                                                                                                                                                                                                                                                                                                                                                                                                                                                                                                                                                                                                                                                                                                                                                                                                                                                                                                                                                                                                                                                                                                                                                                                                         | 2.1 deg/ppm          |         |                   |            |                        |          |                                                 |             |                                   |      |                    |       |           |      |           |               |            |     |       |     |       |     |       |     |       |      |       |     |       |     |       |     |       |      |       |     |       |      |       |     |       |     |       |     |       |     |       |     |       |     |       |      |          |      |         |        |       |     |       |     |       |      |       |        |       |     |       |         |       |    |       |          |       |     |       |        |       |     |       |         |                                                                                                                                                                                                                                                                                                                                                                                                                                                                                                            |            |           |        |           |            |            |           |              |             |            |                                          |                 |                                                  |                          |
| <table><tr><th colspan="2">INPUT CHANGES</th></tr><tr><td>deltat= 5.000e-04</td><td></td></tr><tr><td>echot= 288.00</td><td></td></tr><tr><td>filbas= '/home/stu11733/.lcmode1/basis-sets/gam</td><td></td></tr><tr><td>ma_press_te288_128mhz_662d.basis'</td><td></td></tr><tr><td>hzpppm= 1.2776e+02</td><td></td></tr><tr><td>icolen= 8</td><td></td></tr><tr><td>icolst= 3</td><td></td></tr><tr><td>irowen= 17</td><td></td></tr></table>                                                                                                                                                                                                                                                                                                                                                                                                                                                                                                                                                                                                                                                                                                                                                                                                                                                                                     | INPUT CHANGES        |         | deltat= 5.000e-04 |            | echot= 288.00          |          | filbas= '/home/stu11733/.lcmode1/basis-sets/gam |             | ma_press_te288_128mhz_662d.basis' |      | hzpppm= 1.2776e+02 |       | icolen= 8 |      | icolst= 3 |               | irowen= 17 |     |       |     |       |     |       |     |       |      |       |     |       |     |       |     |       |      |       |     |       |      |       |     |       |     |       |     |       |     |       |     |       |     |       |      |          |      |         |        |       |     |       |     |       |      |       |        |       |     |       |         |       |    |       |          |       |     |       |        |       |     |       |         |                                                                                                                                                                                                                                                                                                                                                                                                                                                                                                            |            |           |        |           |            |            |           |              |             |            |                                          |                 |                                                  |                          |
| INPUT CHANGES                                                                                                                                                                                                                                                                                                                                                                                                                                                                                                                                                                                                                                                                                                                                                                                                                                                                                                                                                                                                                                                                                                                                                                                                                                                                                                                      |                      |         |                   |            |                        |          |                                                 |             |                                   |      |                    |       |           |      |           |               |            |     |       |     |       |     |       |     |       |      |       |     |       |     |       |     |       |      |       |     |       |      |       |     |       |     |       |     |       |     |       |     |       |     |       |      |          |      |         |        |       |     |       |     |       |      |       |        |       |     |       |         |       |    |       |          |       |     |       |        |       |     |       |         |                                                                                                                                                                                                                                                                                                                                                                                                                                                                                                            |            |           |        |           |            |            |           |              |             |            |                                          |                 |                                                  |                          |
| deltat= 5.000e-04                                                                                                                                                                                                                                                                                                                                                                                                                                                                                                                                                                                                                                                                                                                                                                                                                                                                                                                                                                                                                                                                                                                                                                                                                                                                                                                  |                      |         |                   |            |                        |          |                                                 |             |                                   |      |                    |       |           |      |           |               |            |     |       |     |       |     |       |     |       |      |       |     |       |     |       |     |       |      |       |     |       |      |       |     |       |     |       |     |       |     |       |     |       |     |       |      |          |      |         |        |       |     |       |     |       |      |       |        |       |     |       |         |       |    |       |          |       |     |       |        |       |     |       |         |                                                                                                                                                                                                                                                                                                                                                                                                                                                                                                            |            |           |        |           |            |            |           |              |             |            |                                          |                 |                                                  |                          |
| echot= 288.00                                                                                                                                                                                                                                                                                                                                                                                                                                                                                                                                                                                                                                                                                                                                                                                                                                                                                                                                                                                                                                                                                                                                                                                                                                                                                                                      |                      |         |                   |            |                        |          |                                                 |             |                                   |      |                    |       |           |      |           |               |            |     |       |     |       |     |       |     |       |      |       |     |       |     |       |     |       |      |       |     |       |      |       |     |       |     |       |     |       |     |       |     |       |     |       |      |          |      |         |        |       |     |       |     |       |      |       |        |       |     |       |         |       |    |       |          |       |     |       |        |       |     |       |         |                                                                                                                                                                                                                                                                                                                                                                                                                                                                                                            |            |           |        |           |            |            |           |              |             |            |                                          |                 |                                                  |                          |
| filbas= '/home/stu11733/.lcmode1/basis-sets/gam                                                                                                                                                                                                                                                                                                                                                                                                                                                                                                                                                                                                                                                                                                                                                                                                                                                                                                                                                                                                                                                                                                                                                                                                                                                                                    |                      |         |                   |            |                        |          |                                                 |             |                                   |      |                    |       |           |      |           |               |            |     |       |     |       |     |       |     |       |      |       |     |       |     |       |     |       |      |       |     |       |      |       |     |       |     |       |     |       |     |       |     |       |     |       |      |          |      |         |        |       |     |       |     |       |      |       |        |       |     |       |         |       |    |       |          |       |     |       |        |       |     |       |         |                                                                                                                                                                                                                                                                                                                                                                                                                                                                                                            |            |           |        |           |            |            |           |              |             |            |                                          |                 |                                                  |                          |
| ma_press_te288_128mhz_662d.basis'                                                                                                                                                                                                                                                                                                                                                                                                                                                                                                                                                                                                                                                                                                                                                                                                                                                                                                                                                                                                                                                                                                                                                                                                                                                                                                  |                      |         |                   |            |                        |          |                                                 |             |                                   |      |                    |       |           |      |           |               |            |     |       |     |       |     |       |     |       |      |       |     |       |     |       |     |       |      |       |     |       |      |       |     |       |     |       |     |       |     |       |     |       |     |       |      |          |      |         |        |       |     |       |     |       |      |       |        |       |     |       |         |       |    |       |          |       |     |       |        |       |     |       |         |                                                                                                                                                                                                                                                                                                                                                                                                                                                                                                            |            |           |        |           |            |            |           |              |             |            |                                          |                 |                                                  |                          |
| hzpppm= 1.2776e+02                                                                                                                                                                                                                                                                                                                                                                                                                                                                                                                                                                                                                                                                                                                                                                                                                                                                                                                                                                                                                                                                                                                                                                                                                                                                                                                 |                      |         |                   |            |                        |          |                                                 |             |                                   |      |                    |       |           |      |           |               |            |     |       |     |       |     |       |     |       |      |       |     |       |     |       |     |       |      |       |     |       |      |       |     |       |     |       |     |       |     |       |     |       |     |       |      |          |      |         |        |       |     |       |     |       |      |       |        |       |     |       |         |       |    |       |          |       |     |       |        |       |     |       |         |                                                                                                                                                                                                                                                                                                                                                                                                                                                                                                            |            |           |        |           |            |            |           |              |             |            |                                          |                 |                                                  |                          |
| icolen= 8                                                                                                                                                                                                                                                                                                                                                                                                                                                                                                                                                                                                                                                                                                                                                                                                                                                                                                                                                                                                                                                                                                                                                                                                                                                                                                                          |                      |         |                   |            |                        |          |                                                 |             |                                   |      |                    |       |           |      |           |               |            |     |       |     |       |     |       |     |       |      |       |     |       |     |       |     |       |      |       |     |       |      |       |     |       |     |       |     |       |     |       |     |       |     |       |      |          |      |         |        |       |     |       |     |       |      |       |        |       |     |       |         |       |    |       |          |       |     |       |        |       |     |       |         |                                                                                                                                                                                                                                                                                                                                                                                                                                                                                                            |            |           |        |           |            |            |           |              |             |            |                                          |                 |                                                  |                          |
| icolst= 3                                                                                                                                                                                                                                                                                                                                                                                                                                                                                                                                                                                                                                                                                                                                                                                                                                                                                                                                                                                                                                                                                                                                                                                                                                                                                                                          |                      |         |                   |            |                        |          |                                                 |             |                                   |      |                    |       |           |      |           |               |            |     |       |     |       |     |       |     |       |      |       |     |       |     |       |     |       |      |       |     |       |      |       |     |       |     |       |     |       |     |       |     |       |     |       |      |          |      |         |        |       |     |       |     |       |      |       |        |       |     |       |         |       |    |       |          |       |     |       |        |       |     |       |         |                                                                                                                                                                                                                                                                                                                                                                                                                                                                                                            |            |           |        |           |            |            |           |              |             |            |                                          |                 |                                                  |                          |
| irowen= 17                                                                                                                                                                                                                                                                                                                                                                                                                                                                                                                                                                                                                                                                                                                                                                                                                                                                                                                                                                                                                                                                                                                                                                                                                                                                                                                         |                      |         |                   |            |                        |          |                                                 |             |                                   |      |                    |       |           |      |           |               |            |     |       |     |       |     |       |     |       |      |       |     |       |     |       |     |       |      |       |     |       |      |       |     |       |     |       |     |       |     |       |     |       |     |       |      |          |      |         |        |       |     |       |     |       |      |       |        |       |     |       |         |       |    |       |          |       |     |       |        |       |     |       |         |                                                                                                                                                                                                                                                                                                                                                                                                                                                                                                            |            |           |        |           |            |            |           |              |             |            |                                          |                 |                                                  |                          |



P43 - tumor  
voxel 14;11

Row#14 Col#11 MR Hirn funktionell (2019.04.26 14:02:53) Subject 12 7.99e-01 mL, TE/TR/NS=288/1500/2  
(s2DSI\_TE288 TR1500)

Data of: Sektion Biomedizinische Bildgebung, Christian-Albrechts-Universitaet zu Kiel

LCModel (Version 6.3-1J) Copyright: S.W. Provencher.

Ref.: Magn. Reson. Med. 30:672-679 (1993).

17-June-2019 14:55

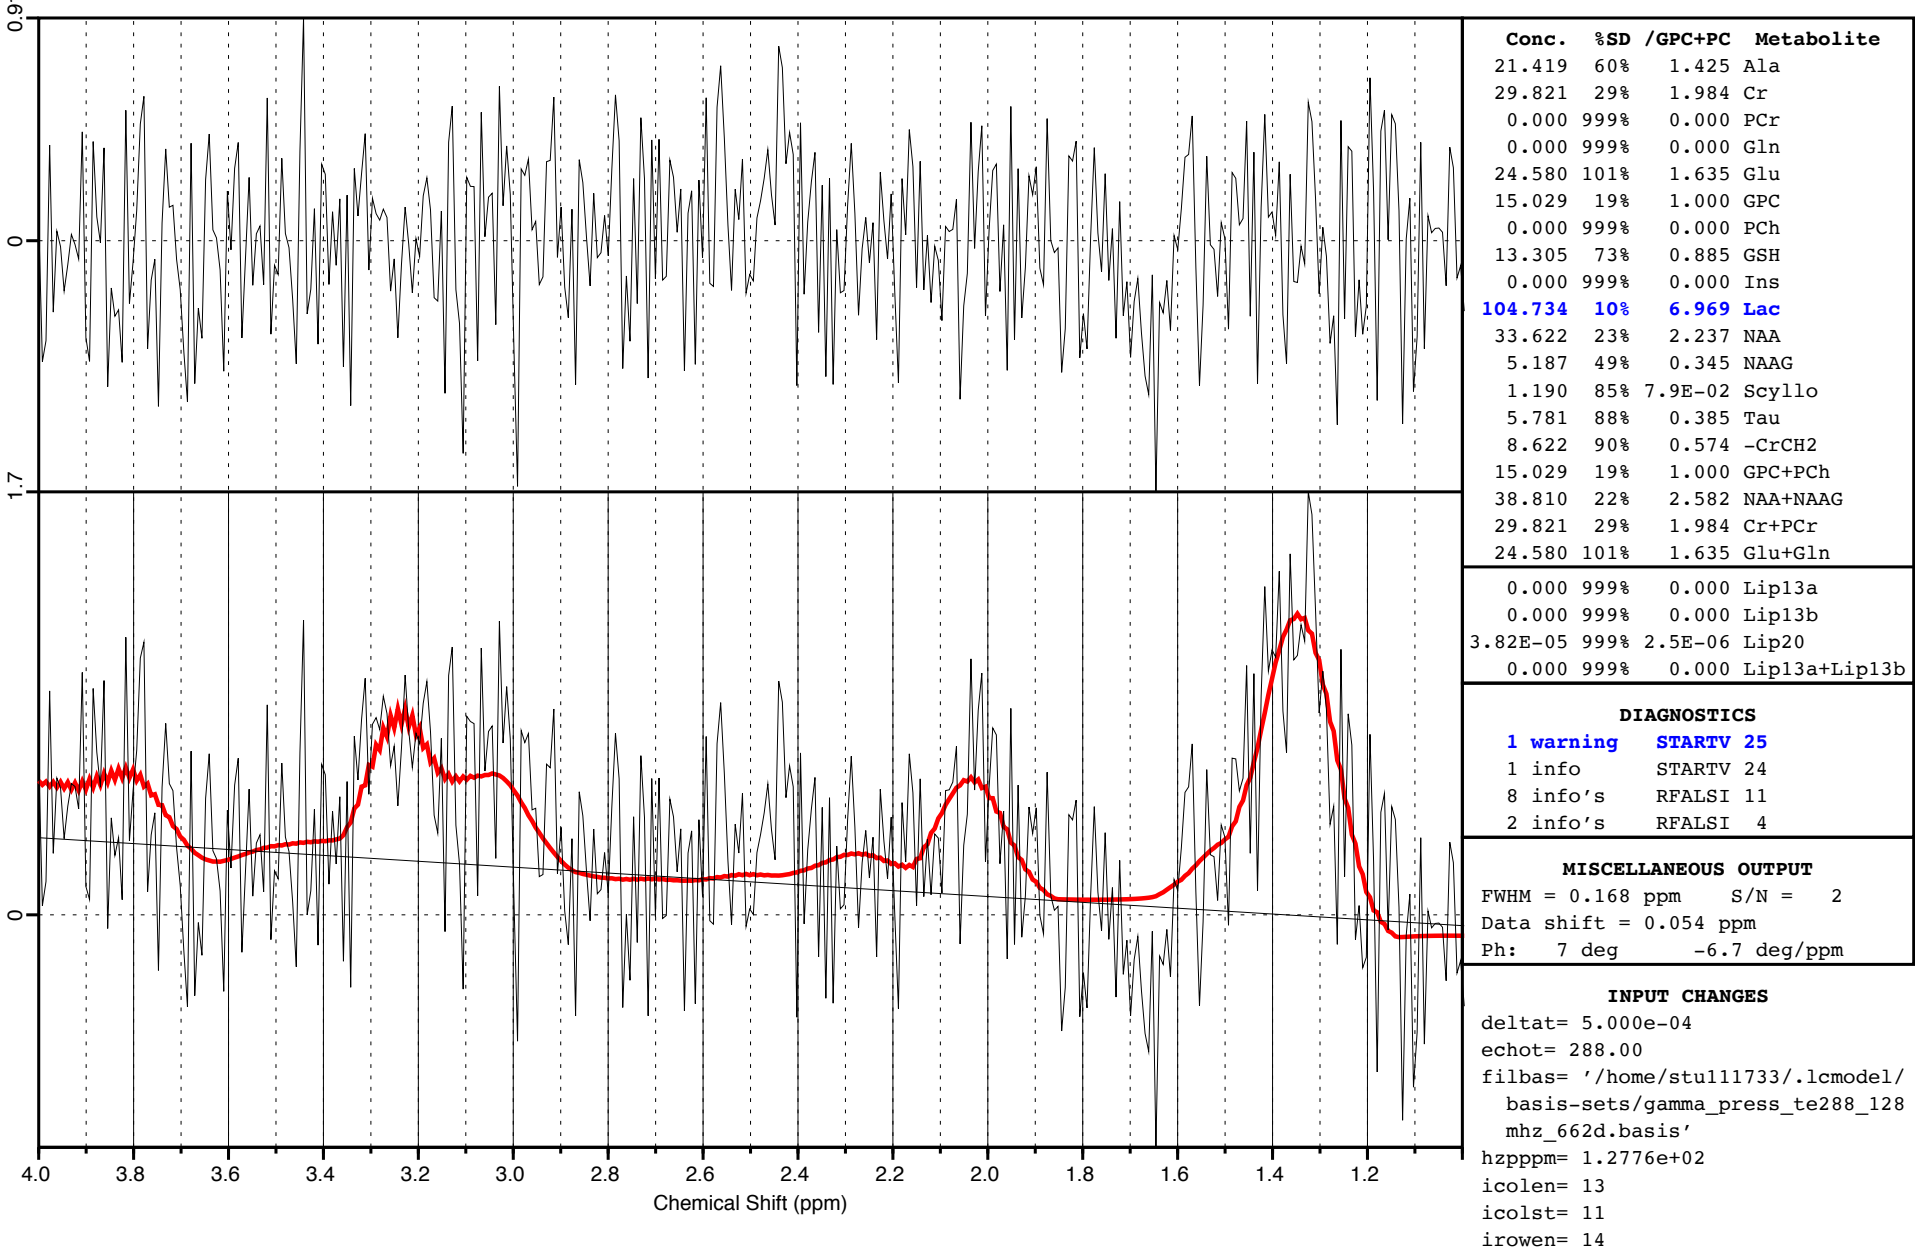

Row#14 Col#11 MR Hirn funktionell (2019.04.26 14:02:53) Subject 12 7.99e-01 mL, TE/TR/NS=288/1500/2 (s2DSI\_TE288 TR1500)

Data of: *Sektion Biomedizinische Bildgebung, Christian-Albrechts-Universitaet zu Kiel*

LCModel (Version 6.3-1J) Copyright: S.W. Provencher.      Ref.: Magn. Reson. Med. 30:672-679 (1993).

17-June-2019 14:55

|                                                                                                                                                                                                                                                                                                                                                                                                                                                                                                                                                                                                                                                                                                                                                                                                                                                                                                                                                                                                                                                                                                                                                                                                                                                                                                                                                                                                                                                                                                                                                                        |
|------------------------------------------------------------------------------------------------------------------------------------------------------------------------------------------------------------------------------------------------------------------------------------------------------------------------------------------------------------------------------------------------------------------------------------------------------------------------------------------------------------------------------------------------------------------------------------------------------------------------------------------------------------------------------------------------------------------------------------------------------------------------------------------------------------------------------------------------------------------------------------------------------------------------------------------------------------------------------------------------------------------------------------------------------------------------------------------------------------------------------------------------------------------------------------------------------------------------------------------------------------------------------------------------------------------------------------------------------------------------------------------------------------------------------------------------------------------------------------------------------------------------------------------------------------------------|
| <div><div><div><div><div>Conc.</div><div>%SD</div><div>/GPC+PC</div><div>Metabolite</div></div><div>21.41960%1.425Ala</div><div>29.82129%1.984Cr</div><div>0.000999%0.000PCr</div><div>0.000999%0.000Gln</div><div>24.580101%1.635Glu</div><div>15.02919%1.000GPC</div><div>0.000999%0.000PCh</div><div>13.30573%0.885GSH</div><div>0.000999%0.000Ins</div><div>104.73410%6.969Lac</div><div>33.62223%2.237NAA</div><div>5.18749%0.345NAAG</div><div>1.19085%7.9E-02Scyllo</div><div>5.78188%0.385Tau</div><div>8.62290%0.574-CrCH2</div><div>15.02919%1.000GPC+PCh</div><div>38.81022%2.582NAA+NAAG</div><div>29.82129%1.984Cr+PCr</div><div>24.580101%1.635Glu+Gln</div></div><div><div>0.000999%0.000Lip13a</div><div>0.000999%0.000Lip13b</div><div>3.82E-05999%2.5E-06Lip20</div><div>0.000999%0.000Lip13a+Lip13b</div></div></div></div> <div><div>DIAGNOSTICS</div><div><div>1 warning</div><div>STARTV 25</div></div><div><div>1 info</div><div>STARTV 24</div></div><div><div>8 info's</div><div>RFALSI 11</div></div><div><div>2 info's</div><div>RFALSI 4</div></div></div> <div><div>MISCELLANEOUS OUTPUT</div><div><div>FWHM = 0.168 ppm</div><div>S/N = 2</div></div><div><div>Data shift = 0.054 ppm</div></div><div><div>Ph: 7 deg</div><div>-6.7 deg/ppm</div></div></div> <div><div>INPUT CHANGES</div><div><div>deltat= 5.000e-04</div><div>echot= 288.00</div><div>filbas= '/home/stu111733/.lcmodel/basis-sets/gam<br/>ma_press_te288_128mhz_662d.basis'</div><div>hzpppm= 1.2776e+02</div><div>icolen= 13</div><div>icolst= 11</div></div></div> |
|------------------------------------------------------------------------------------------------------------------------------------------------------------------------------------------------------------------------------------------------------------------------------------------------------------------------------------------------------------------------------------------------------------------------------------------------------------------------------------------------------------------------------------------------------------------------------------------------------------------------------------------------------------------------------------------------------------------------------------------------------------------------------------------------------------------------------------------------------------------------------------------------------------------------------------------------------------------------------------------------------------------------------------------------------------------------------------------------------------------------------------------------------------------------------------------------------------------------------------------------------------------------------------------------------------------------------------------------------------------------------------------------------------------------------------------------------------------------------------------------------------------------------------------------------------------------|

irowen= 14

irowst= 12

islice= 1

lps= 8

ltable= 7

ndcols= 16

ndrows= 20

ndslic= 1

nunfil= 1024

ppmend= 1.0

ppmst= 4.0

savdir= '/home/stu111733/.lcmodel/saved/'

sptype= 'tumor'

srcraw= '/home/data/Studies/GBM\_Spektro/data/s12  
/DBIEX\_11\_1\_raw\_act.SDAT'

# P43 - edema voxel 11;11

Row#11 Col#11 MR Hirn funktionell (2019.04.26 14:02:53) Subject 12 7.99e-01 mL, TE/TR/NS=288/1500/2  
(s2DSI\_TE288 TR1500)

Data of: Sektion Biomedizinische Bildgebung, Christian-Albrechts-Universitaet zu Kiel

LCModel (Version 6.3-1J) Copyright: S.W. Provencher.

Ref.: Magn. Reson. Med. 30:672-679 (1993).

28-November-2019 15:28

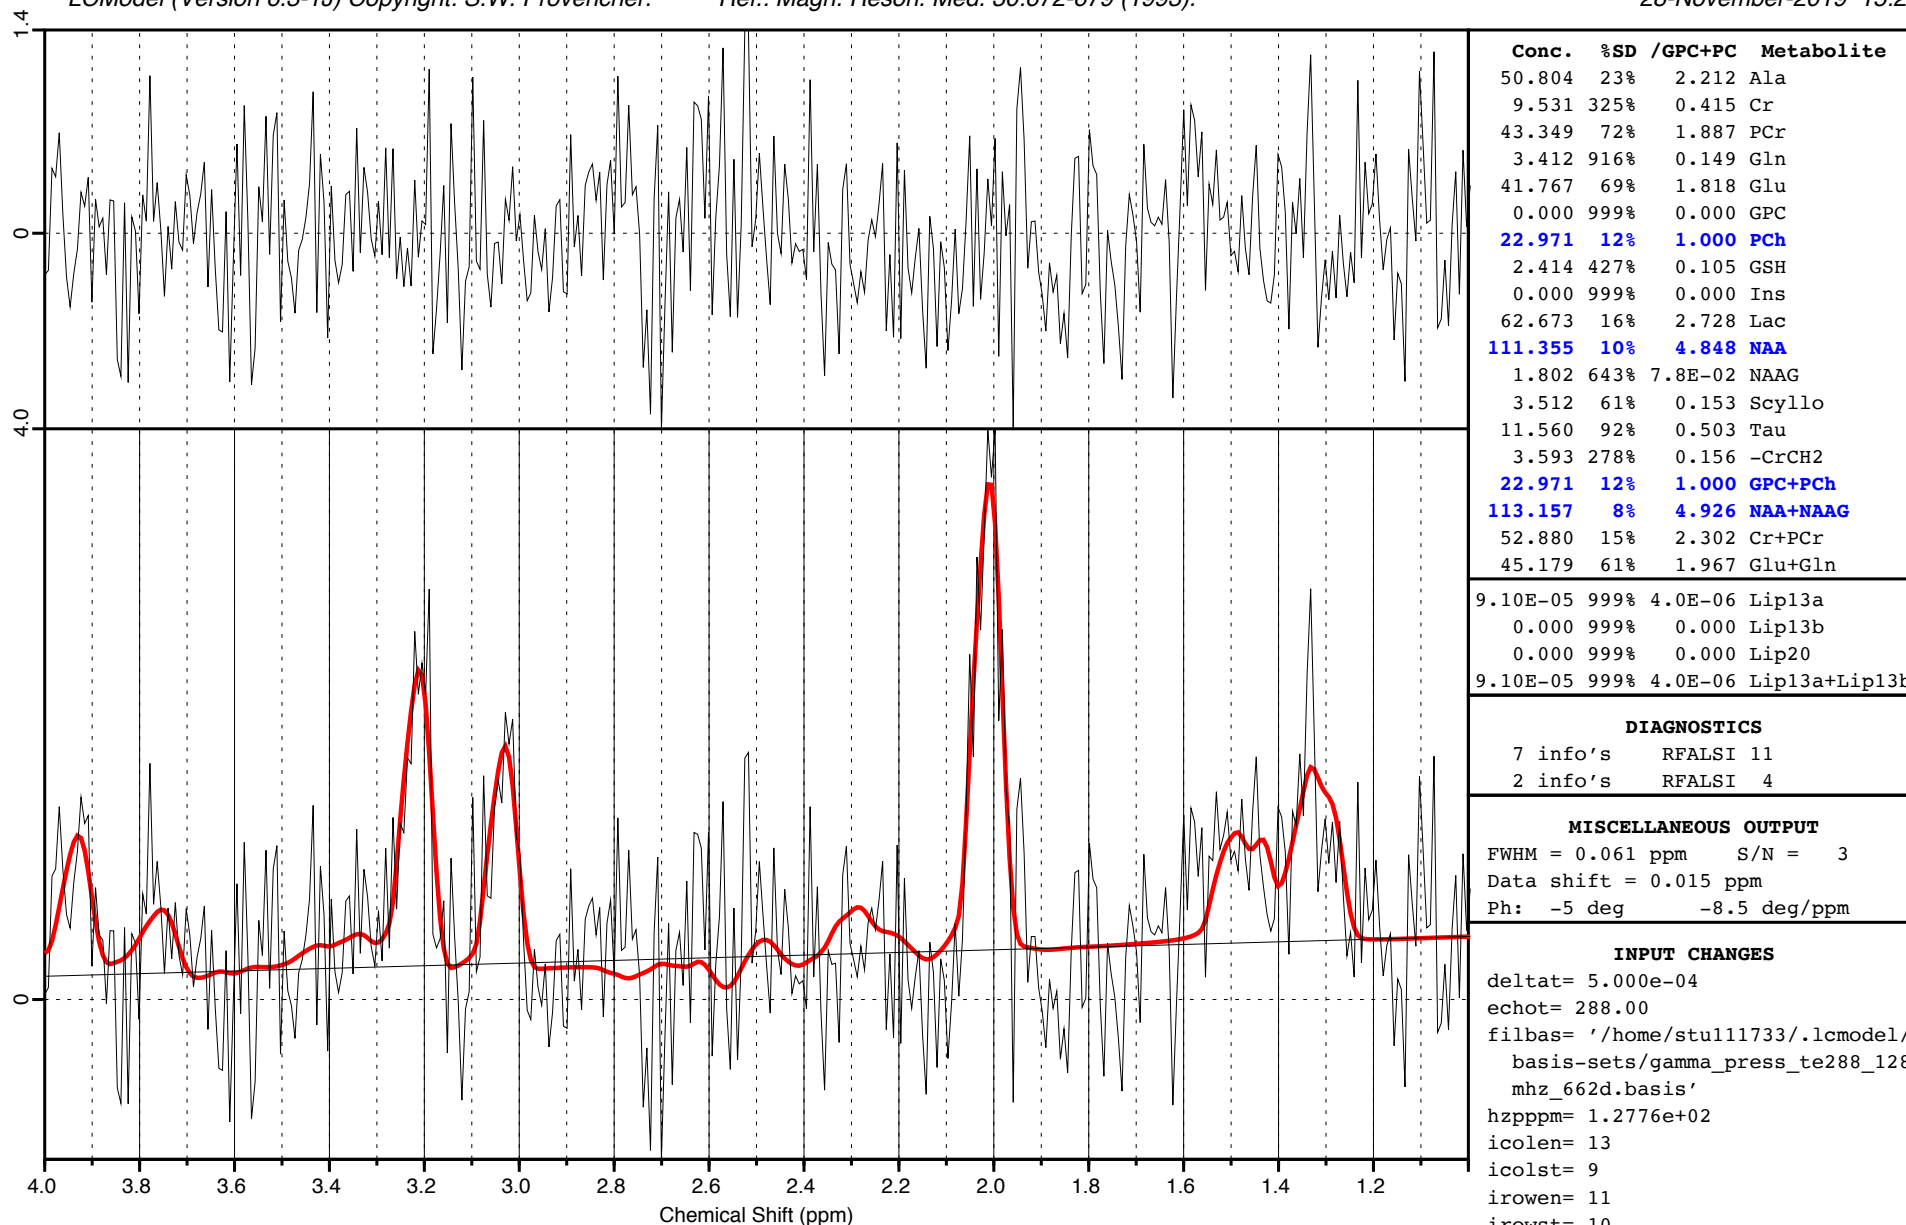

| Conc.          | %SD        | /GPC+PC      | Metabolite      |
|----------------|------------|--------------|-----------------|
| 50.804         | 23%        | 2.212        | Ala             |
| 9.531          | 325%       | 0.415        | Cr              |
| 43.349         | 72%        | 1.887        | PCr             |
| 3.412          | 916%       | 0.149        | Gln             |
| 41.767         | 69%        | 1.818        | Glu             |
| 0.000          | 999%       | 0.000        | GPC             |
| <b>22.971</b>  | <b>12%</b> | <b>1.000</b> | <b>PCh</b>      |
| 2.414          | 427%       | 0.105        | GSH             |
| 0.000          | 999%       | 0.000        | Ins             |
| 62.673         | 16%        | 2.728        | Lac             |
| <b>111.355</b> | <b>10%</b> | <b>4.848</b> | <b>NAA</b>      |
| 1.802          | 643%       | 7.8E-02      | NAAG            |
| 3.512          | 61%        | 0.153        | Scyllo          |
| 11.560         | 92%        | 0.503        | Tau             |
| 3.593          | 278%       | 0.156        | -CrCH2          |
| <b>22.971</b>  | <b>12%</b> | <b>1.000</b> | <b>GPC+PCh</b>  |
| <b>113.157</b> | <b>8%</b>  | <b>4.926</b> | <b>NAA+NAAG</b> |
| 52.880         | 15%        | 2.302        | Cr+PCr          |
| 45.179         | 61%        | 1.967        | Glu+Gln         |

|          |      |         |               |
|----------|------|---------|---------------|
| 9.10E-05 | 999% | 4.0E-06 | Lip13a        |
| 0.000    | 999% | 0.000   | Lip13b        |
| 0.000    | 999% | 0.000   | Lip20         |
| 9.10E-05 | 999% | 4.0E-06 | Lip13a+Lip13b |

## DIAGNOSTICS

7 info's RFALSI 11  
2 info's RFALSI 4

## MISCELLANEOUS OUTPUT

FWHM = 0.061 ppm S/N = 3  
Data shift = 0.015 ppm  
Ph: -5 deg -8.5 deg/ppm

## INPUT CHANGES

deltat= 5.000e-04  
echot= 288.00  
filbas= '/home/stu11733/.lcmmodel/  
basis-sets/gamma\_press\_te288\_128  
mhz\_662d.basis'  
hzpppm= 1.2776e+02  
icolen= 13  
icolst= 9  
irowen= 11  
irowst= 10  
islice= 1

# P43 - edema voxel 11;11

Row#11 Col#11 MR Hirn funktionell (2019.04.26 14:02:53) Subject 12 7.99e-01 mL, TE/TR/NS=288/1500/2 (s2DSI\_TE288 TR1500)

Data of: Sektion Biomedizinische Bildgebung, Christian-Albrechts-Universitaet zu Kiel

LCModel (Version 6.3-1J) Copyright: S.W. Provencher.

Ref.: Magn. Reson. Med. 30:672-679 (1993).

28-November-2019 15:28

| <table><tr><th>Conc.</th><th>%SD</th><th>/GPC+PC</th><th>Metabolite</th></tr><tr><td>50.804</td><td>23%</td><td>2.212</td><td>Ala</td></tr><tr><td>9.531</td><td>325%</td><td>0.415</td><td>Cr</td></tr><tr><td>43.349</td><td>72%</td><td>1.887</td><td>PCr</td></tr><tr><td>3.412</td><td>916%</td><td>0.149</td><td>Gln</td></tr><tr><td>41.767</td><td>69%</td><td>1.818</td><td>Glu</td></tr><tr><td>0.000</td><td>999%</td><td>0.000</td><td>GPC</td></tr><tr><td>22.971</td><td>12%</td><td>1.000</td><td>PCh</td></tr><tr><td>2.414</td><td>427%</td><td>0.105</td><td>GSH</td></tr><tr><td>0.000</td><td>999%</td><td>0.000</td><td>Ins</td></tr><tr><td>62.673</td><td>16%</td><td>2.728</td><td>Lac</td></tr><tr><td>111.355</td><td>10%</td><td>4.848</td><td>NAA</td></tr><tr><td>1.802</td><td>643%</td><td>7.8E-02</td><td>NAAG</td></tr><tr><td>3.512</td><td>61%</td><td>0.153</td><td>Scyllo</td></tr><tr><td>11.560</td><td>92%</td><td>0.503</td><td>Tau</td></tr><tr><td>3.593</td><td>278%</td><td>0.156</td><td>-CrCH2</td></tr><tr><td>22.971</td><td>12%</td><td>1.000</td><td>GPC+PCh</td></tr><tr><td>113.157</td><td>8%</td><td>4.926</td><td>NAA+NAAG</td></tr><tr><td>52.880</td><td>15%</td><td>2.302</td><td>Cr+PCr</td></tr><tr><td>45.179</td><td>61%</td><td>1.967</td><td>Glu+Gln</td></tr></table> | Conc.                | %SD     | /GPC+PC       | Metabolite | 50.804                   | 23%    | 2.212  | Ala    | 9.531                  | 325%   | 0.415  | Cr    | 43.349                                                                             | 72%  | 1.887   | PCr           | 3.412              | 916% | 0.149 | Gln | 41.767     | 69% | 1.818 | Glu | 0.000     | 999% | 0.000 | GPC | 22.971     | 12% | 1.000 | PCh | 2.414      | 427% | 0.105 | GSH | 0.000 | 999% | 0.000 | Ins | 62.673 | 16% | 2.728 | Lac | 111.355 | 10% | 4.848 | NAA | 1.802 | 643% | 7.8E-02 | NAAG | 3.512 | 61% | 0.153 | Scyllo | 11.560 | 92% | 0.503 | Tau | 3.593 | 278% | 0.156 | -CrCH2 | 22.971 | 12% | 1.000 | GPC+PCh | 113.157 | 8% | 4.926 | NAA+NAAG | 52.880 | 15% | 2.302 | Cr+PCr | 45.179 | 61% | 1.967 | Glu+Gln | <table><tr><td>islice= 1</td></tr><tr><td>lps= 8</td></tr><tr><td>ltable= 7</td></tr><tr><td>ndcols= 16</td></tr><tr><td>ndrows= 20</td></tr><tr><td>ndslic= 1</td></tr><tr><td>nunfil= 1024</td></tr><tr><td>ppmend= 1.0</td></tr><tr><td>ppmst= 4.0</td></tr><tr><td>savdir= '/home/stu111733/.lcmodel/saved/MR_Hirn_funktionell/s12/2019.04.26_14:02:53/'</td></tr><tr><td>sptype= 'tumor'</td></tr><tr><td>srcraw= '/home/data/Studies/GBM_Spektro/data/s12_ff/DBIEX_11_1_raw_act.SDAT'</td></tr></table> | islice= 1 | lps= 8 | ltable= 7 | ndcols= 16 | ndrows= 20 | ndslic= 1 | nunfil= 1024 | ppmend= 1.0 | ppmst= 4.0 | savdir= '/home/stu111733/.lcmodel/saved/MR_Hirn_funktionell/s12/2019.04.26_14:02:53/' | sptype= 'tumor' | srcraw= '/home/data/Studies/GBM_Spektro/data/s12_ff/DBIEX_11_1_raw_act.SDAT' |
|-----------------------------------------------------------------------------------------------------------------------------------------------------------------------------------------------------------------------------------------------------------------------------------------------------------------------------------------------------------------------------------------------------------------------------------------------------------------------------------------------------------------------------------------------------------------------------------------------------------------------------------------------------------------------------------------------------------------------------------------------------------------------------------------------------------------------------------------------------------------------------------------------------------------------------------------------------------------------------------------------------------------------------------------------------------------------------------------------------------------------------------------------------------------------------------------------------------------------------------------------------------------------------------------------------------------------------------------|----------------------|---------|---------------|------------|--------------------------|--------|--------|--------|------------------------|--------|--------|-------|------------------------------------------------------------------------------------|------|---------|---------------|--------------------|------|-------|-----|------------|-----|-------|-----|-----------|------|-------|-----|------------|-----|-------|-----|------------|------|-------|-----|-------|------|-------|-----|--------|-----|-------|-----|---------|-----|-------|-----|-------|------|---------|------|-------|-----|-------|--------|--------|-----|-------|-----|-------|------|-------|--------|--------|-----|-------|---------|---------|----|-------|----------|--------|-----|-------|--------|--------|-----|-------|---------|---------------------------------------------------------------------------------------------------------------------------------------------------------------------------------------------------------------------------------------------------------------------------------------------------------------------------------------------------------------------------------------------------------------------------------------------------------------------------------------------------------------|-----------|--------|-----------|------------|------------|-----------|--------------|-------------|------------|---------------------------------------------------------------------------------------|-----------------|------------------------------------------------------------------------------|
| Conc.                                                                                                                                                                                                                                                                                                                                                                                                                                                                                                                                                                                                                                                                                                                                                                                                                                                                                                                                                                                                                                                                                                                                                                                                                                                                                                                                   | %SD                  | /GPC+PC | Metabolite    |            |                          |        |        |        |                        |        |        |       |                                                                                    |      |         |               |                    |      |       |     |            |     |       |     |           |      |       |     |            |     |       |     |            |      |       |     |       |      |       |     |        |     |       |     |         |     |       |     |       |      |         |      |       |     |       |        |        |     |       |     |       |      |       |        |        |     |       |         |         |    |       |          |        |     |       |        |        |     |       |         |                                                                                                                                                                                                                                                                                                                                                                                                                                                                                                               |           |        |           |            |            |           |              |             |            |                                                                                       |                 |                                                                              |
| 50.804                                                                                                                                                                                                                                                                                                                                                                                                                                                                                                                                                                                                                                                                                                                                                                                                                                                                                                                                                                                                                                                                                                                                                                                                                                                                                                                                  | 23%                  | 2.212   | Ala           |            |                          |        |        |        |                        |        |        |       |                                                                                    |      |         |               |                    |      |       |     |            |     |       |     |           |      |       |     |            |     |       |     |            |      |       |     |       |      |       |     |        |     |       |     |         |     |       |     |       |      |         |      |       |     |       |        |        |     |       |     |       |      |       |        |        |     |       |         |         |    |       |          |        |     |       |        |        |     |       |         |                                                                                                                                                                                                                                                                                                                                                                                                                                                                                                               |           |        |           |            |            |           |              |             |            |                                                                                       |                 |                                                                              |
| 9.531                                                                                                                                                                                                                                                                                                                                                                                                                                                                                                                                                                                                                                                                                                                                                                                                                                                                                                                                                                                                                                                                                                                                                                                                                                                                                                                                   | 325%                 | 0.415   | Cr            |            |                          |        |        |        |                        |        |        |       |                                                                                    |      |         |               |                    |      |       |     |            |     |       |     |           |      |       |     |            |     |       |     |            |      |       |     |       |      |       |     |        |     |       |     |         |     |       |     |       |      |         |      |       |     |       |        |        |     |       |     |       |      |       |        |        |     |       |         |         |    |       |          |        |     |       |        |        |     |       |         |                                                                                                                                                                                                                                                                                                                                                                                                                                                                                                               |           |        |           |            |            |           |              |             |            |                                                                                       |                 |                                                                              |
| 43.349                                                                                                                                                                                                                                                                                                                                                                                                                                                                                                                                                                                                                                                                                                                                                                                                                                                                                                                                                                                                                                                                                                                                                                                                                                                                                                                                  | 72%                  | 1.887   | PCr           |            |                          |        |        |        |                        |        |        |       |                                                                                    |      |         |               |                    |      |       |     |            |     |       |     |           |      |       |     |            |     |       |     |            |      |       |     |       |      |       |     |        |     |       |     |         |     |       |     |       |      |         |      |       |     |       |        |        |     |       |     |       |      |       |        |        |     |       |         |         |    |       |          |        |     |       |        |        |     |       |         |                                                                                                                                                                                                                                                                                                                                                                                                                                                                                                               |           |        |           |            |            |           |              |             |            |                                                                                       |                 |                                                                              |
| 3.412                                                                                                                                                                                                                                                                                                                                                                                                                                                                                                                                                                                                                                                                                                                                                                                                                                                                                                                                                                                                                                                                                                                                                                                                                                                                                                                                   | 916%                 | 0.149   | Gln           |            |                          |        |        |        |                        |        |        |       |                                                                                    |      |         |               |                    |      |       |     |            |     |       |     |           |      |       |     |            |     |       |     |            |      |       |     |       |      |       |     |        |     |       |     |         |     |       |     |       |      |         |      |       |     |       |        |        |     |       |     |       |      |       |        |        |     |       |         |         |    |       |          |        |     |       |        |        |     |       |         |                                                                                                                                                                                                                                                                                                                                                                                                                                                                                                               |           |        |           |            |            |           |              |             |            |                                                                                       |                 |                                                                              |
| 41.767                                                                                                                                                                                                                                                                                                                                                                                                                                                                                                                                                                                                                                                                                                                                                                                                                                                                                                                                                                                                                                                                                                                                                                                                                                                                                                                                  | 69%                  | 1.818   | Glu           |            |                          |        |        |        |                        |        |        |       |                                                                                    |      |         |               |                    |      |       |     |            |     |       |     |           |      |       |     |            |     |       |     |            |      |       |     |       |      |       |     |        |     |       |     |         |     |       |     |       |      |         |      |       |     |       |        |        |     |       |     |       |      |       |        |        |     |       |         |         |    |       |          |        |     |       |        |        |     |       |         |                                                                                                                                                                                                                                                                                                                                                                                                                                                                                                               |           |        |           |            |            |           |              |             |            |                                                                                       |                 |                                                                              |
| 0.000                                                                                                                                                                                                                                                                                                                                                                                                                                                                                                                                                                                                                                                                                                                                                                                                                                                                                                                                                                                                                                                                                                                                                                                                                                                                                                                                   | 999%                 | 0.000   | GPC           |            |                          |        |        |        |                        |        |        |       |                                                                                    |      |         |               |                    |      |       |     |            |     |       |     |           |      |       |     |            |     |       |     |            |      |       |     |       |      |       |     |        |     |       |     |         |     |       |     |       |      |         |      |       |     |       |        |        |     |       |     |       |      |       |        |        |     |       |         |         |    |       |          |        |     |       |        |        |     |       |         |                                                                                                                                                                                                                                                                                                                                                                                                                                                                                                               |           |        |           |            |            |           |              |             |            |                                                                                       |                 |                                                                              |
| 22.971                                                                                                                                                                                                                                                                                                                                                                                                                                                                                                                                                                                                                                                                                                                                                                                                                                                                                                                                                                                                                                                                                                                                                                                                                                                                                                                                  | 12%                  | 1.000   | PCh           |            |                          |        |        |        |                        |        |        |       |                                                                                    |      |         |               |                    |      |       |     |            |     |       |     |           |      |       |     |            |     |       |     |            |      |       |     |       |      |       |     |        |     |       |     |         |     |       |     |       |      |         |      |       |     |       |        |        |     |       |     |       |      |       |        |        |     |       |         |         |    |       |          |        |     |       |        |        |     |       |         |                                                                                                                                                                                                                                                                                                                                                                                                                                                                                                               |           |        |           |            |            |           |              |             |            |                                                                                       |                 |                                                                              |
| 2.414                                                                                                                                                                                                                                                                                                                                                                                                                                                                                                                                                                                                                                                                                                                                                                                                                                                                                                                                                                                                                                                                                                                                                                                                                                                                                                                                   | 427%                 | 0.105   | GSH           |            |                          |        |        |        |                        |        |        |       |                                                                                    |      |         |               |                    |      |       |     |            |     |       |     |           |      |       |     |            |     |       |     |            |      |       |     |       |      |       |     |        |     |       |     |         |     |       |     |       |      |         |      |       |     |       |        |        |     |       |     |       |      |       |        |        |     |       |         |         |    |       |          |        |     |       |        |        |     |       |         |                                                                                                                                                                                                                                                                                                                                                                                                                                                                                                               |           |        |           |            |            |           |              |             |            |                                                                                       |                 |                                                                              |
| 0.000                                                                                                                                                                                                                                                                                                                                                                                                                                                                                                                                                                                                                                                                                                                                                                                                                                                                                                                                                                                                                                                                                                                                                                                                                                                                                                                                   | 999%                 | 0.000   | Ins           |            |                          |        |        |        |                        |        |        |       |                                                                                    |      |         |               |                    |      |       |     |            |     |       |     |           |      |       |     |            |     |       |     |            |      |       |     |       |      |       |     |        |     |       |     |         |     |       |     |       |      |         |      |       |     |       |        |        |     |       |     |       |      |       |        |        |     |       |         |         |    |       |          |        |     |       |        |        |     |       |         |                                                                                                                                                                                                                                                                                                                                                                                                                                                                                                               |           |        |           |            |            |           |              |             |            |                                                                                       |                 |                                                                              |
| 62.673                                                                                                                                                                                                                                                                                                                                                                                                                                                                                                                                                                                                                                                                                                                                                                                                                                                                                                                                                                                                                                                                                                                                                                                                                                                                                                                                  | 16%                  | 2.728   | Lac           |            |                          |        |        |        |                        |        |        |       |                                                                                    |      |         |               |                    |      |       |     |            |     |       |     |           |      |       |     |            |     |       |     |            |      |       |     |       |      |       |     |        |     |       |     |         |     |       |     |       |      |         |      |       |     |       |        |        |     |       |     |       |      |       |        |        |     |       |         |         |    |       |          |        |     |       |        |        |     |       |         |                                                                                                                                                                                                                                                                                                                                                                                                                                                                                                               |           |        |           |            |            |           |              |             |            |                                                                                       |                 |                                                                              |
| 111.355                                                                                                                                                                                                                                                                                                                                                                                                                                                                                                                                                                                                                                                                                                                                                                                                                                                                                                                                                                                                                                                                                                                                                                                                                                                                                                                                 | 10%                  | 4.848   | NAA           |            |                          |        |        |        |                        |        |        |       |                                                                                    |      |         |               |                    |      |       |     |            |     |       |     |           |      |       |     |            |     |       |     |            |      |       |     |       |      |       |     |        |     |       |     |         |     |       |     |       |      |         |      |       |     |       |        |        |     |       |     |       |      |       |        |        |     |       |         |         |    |       |          |        |     |       |        |        |     |       |         |                                                                                                                                                                                                                                                                                                                                                                                                                                                                                                               |           |        |           |            |            |           |              |             |            |                                                                                       |                 |                                                                              |
| 1.802                                                                                                                                                                                                                                                                                                                                                                                                                                                                                                                                                                                                                                                                                                                                                                                                                                                                                                                                                                                                                                                                                                                                                                                                                                                                                                                                   | 643%                 | 7.8E-02 | NAAG          |            |                          |        |        |        |                        |        |        |       |                                                                                    |      |         |               |                    |      |       |     |            |     |       |     |           |      |       |     |            |     |       |     |            |      |       |     |       |      |       |     |        |     |       |     |         |     |       |     |       |      |         |      |       |     |       |        |        |     |       |     |       |      |       |        |        |     |       |         |         |    |       |          |        |     |       |        |        |     |       |         |                                                                                                                                                                                                                                                                                                                                                                                                                                                                                                               |           |        |           |            |            |           |              |             |            |                                                                                       |                 |                                                                              |
| 3.512                                                                                                                                                                                                                                                                                                                                                                                                                                                                                                                                                                                                                                                                                                                                                                                                                                                                                                                                                                                                                                                                                                                                                                                                                                                                                                                                   | 61%                  | 0.153   | Scyllo        |            |                          |        |        |        |                        |        |        |       |                                                                                    |      |         |               |                    |      |       |     |            |     |       |     |           |      |       |     |            |     |       |     |            |      |       |     |       |      |       |     |        |     |       |     |         |     |       |     |       |      |         |      |       |     |       |        |        |     |       |     |       |      |       |        |        |     |       |         |         |    |       |          |        |     |       |        |        |     |       |         |                                                                                                                                                                                                                                                                                                                                                                                                                                                                                                               |           |        |           |            |            |           |              |             |            |                                                                                       |                 |                                                                              |
| 11.560                                                                                                                                                                                                                                                                                                                                                                                                                                                                                                                                                                                                                                                                                                                                                                                                                                                                                                                                                                                                                                                                                                                                                                                                                                                                                                                                  | 92%                  | 0.503   | Tau           |            |                          |        |        |        |                        |        |        |       |                                                                                    |      |         |               |                    |      |       |     |            |     |       |     |           |      |       |     |            |     |       |     |            |      |       |     |       |      |       |     |        |     |       |     |         |     |       |     |       |      |         |      |       |     |       |        |        |     |       |     |       |      |       |        |        |     |       |         |         |    |       |          |        |     |       |        |        |     |       |         |                                                                                                                                                                                                                                                                                                                                                                                                                                                                                                               |           |        |           |            |            |           |              |             |            |                                                                                       |                 |                                                                              |
| 3.593                                                                                                                                                                                                                                                                                                                                                                                                                                                                                                                                                                                                                                                                                                                                                                                                                                                                                                                                                                                                                                                                                                                                                                                                                                                                                                                                   | 278%                 | 0.156   | -CrCH2        |            |                          |        |        |        |                        |        |        |       |                                                                                    |      |         |               |                    |      |       |     |            |     |       |     |           |      |       |     |            |     |       |     |            |      |       |     |       |      |       |     |        |     |       |     |         |     |       |     |       |      |         |      |       |     |       |        |        |     |       |     |       |      |       |        |        |     |       |         |         |    |       |          |        |     |       |        |        |     |       |         |                                                                                                                                                                                                                                                                                                                                                                                                                                                                                                               |           |        |           |            |            |           |              |             |            |                                                                                       |                 |                                                                              |
| 22.971                                                                                                                                                                                                                                                                                                                                                                                                                                                                                                                                                                                                                                                                                                                                                                                                                                                                                                                                                                                                                                                                                                                                                                                                                                                                                                                                  | 12%                  | 1.000   | GPC+PCh       |            |                          |        |        |        |                        |        |        |       |                                                                                    |      |         |               |                    |      |       |     |            |     |       |     |           |      |       |     |            |     |       |     |            |      |       |     |       |      |       |     |        |     |       |     |         |     |       |     |       |      |         |      |       |     |       |        |        |     |       |     |       |      |       |        |        |     |       |         |         |    |       |          |        |     |       |        |        |     |       |         |                                                                                                                                                                                                                                                                                                                                                                                                                                                                                                               |           |        |           |            |            |           |              |             |            |                                                                                       |                 |                                                                              |
| 113.157                                                                                                                                                                                                                                                                                                                                                                                                                                                                                                                                                                                                                                                                                                                                                                                                                                                                                                                                                                                                                                                                                                                                                                                                                                                                                                                                 | 8%                   | 4.926   | NAA+NAAG      |            |                          |        |        |        |                        |        |        |       |                                                                                    |      |         |               |                    |      |       |     |            |     |       |     |           |      |       |     |            |     |       |     |            |      |       |     |       |      |       |     |        |     |       |     |         |     |       |     |       |      |         |      |       |     |       |        |        |     |       |     |       |      |       |        |        |     |       |         |         |    |       |          |        |     |       |        |        |     |       |         |                                                                                                                                                                                                                                                                                                                                                                                                                                                                                                               |           |        |           |            |            |           |              |             |            |                                                                                       |                 |                                                                              |
| 52.880                                                                                                                                                                                                                                                                                                                                                                                                                                                                                                                                                                                                                                                                                                                                                                                                                                                                                                                                                                                                                                                                                                                                                                                                                                                                                                                                  | 15%                  | 2.302   | Cr+PCr        |            |                          |        |        |        |                        |        |        |       |                                                                                    |      |         |               |                    |      |       |     |            |     |       |     |           |      |       |     |            |     |       |     |            |      |       |     |       |      |       |     |        |     |       |     |         |     |       |     |       |      |         |      |       |     |       |        |        |     |       |     |       |      |       |        |        |     |       |         |         |    |       |          |        |     |       |        |        |     |       |         |                                                                                                                                                                                                                                                                                                                                                                                                                                                                                                               |           |        |           |            |            |           |              |             |            |                                                                                       |                 |                                                                              |
| 45.179                                                                                                                                                                                                                                                                                                                                                                                                                                                                                                                                                                                                                                                                                                                                                                                                                                                                                                                                                                                                                                                                                                                                                                                                                                                                                                                                  | 61%                  | 1.967   | Glu+Gln       |            |                          |        |        |        |                        |        |        |       |                                                                                    |      |         |               |                    |      |       |     |            |     |       |     |           |      |       |     |            |     |       |     |            |      |       |     |       |      |       |     |        |     |       |     |         |     |       |     |       |      |         |      |       |     |       |        |        |     |       |     |       |      |       |        |        |     |       |         |         |    |       |          |        |     |       |        |        |     |       |         |                                                                                                                                                                                                                                                                                                                                                                                                                                                                                                               |           |        |           |            |            |           |              |             |            |                                                                                       |                 |                                                                              |
| islice= 1                                                                                                                                                                                                                                                                                                                                                                                                                                                                                                                                                                                                                                                                                                                                                                                                                                                                                                                                                                                                                                                                                                                                                                                                                                                                                                                               |                      |         |               |            |                          |        |        |        |                        |        |        |       |                                                                                    |      |         |               |                    |      |       |     |            |     |       |     |           |      |       |     |            |     |       |     |            |      |       |     |       |      |       |     |        |     |       |     |         |     |       |     |       |      |         |      |       |     |       |        |        |     |       |     |       |      |       |        |        |     |       |         |         |    |       |          |        |     |       |        |        |     |       |         |                                                                                                                                                                                                                                                                                                                                                                                                                                                                                                               |           |        |           |            |            |           |              |             |            |                                                                                       |                 |                                                                              |
| lps= 8                                                                                                                                                                                                                                                                                                                                                                                                                                                                                                                                                                                                                                                                                                                                                                                                                                                                                                                                                                                                                                                                                                                                                                                                                                                                                                                                  |                      |         |               |            |                          |        |        |        |                        |        |        |       |                                                                                    |      |         |               |                    |      |       |     |            |     |       |     |           |      |       |     |            |     |       |     |            |      |       |     |       |      |       |     |        |     |       |     |         |     |       |     |       |      |         |      |       |     |       |        |        |     |       |     |       |      |       |        |        |     |       |         |         |    |       |          |        |     |       |        |        |     |       |         |                                                                                                                                                                                                                                                                                                                                                                                                                                                                                                               |           |        |           |            |            |           |              |             |            |                                                                                       |                 |                                                                              |
| ltable= 7                                                                                                                                                                                                                                                                                                                                                                                                                                                                                                                                                                                                                                                                                                                                                                                                                                                                                                                                                                                                                                                                                                                                                                                                                                                                                                                               |                      |         |               |            |                          |        |        |        |                        |        |        |       |                                                                                    |      |         |               |                    |      |       |     |            |     |       |     |           |      |       |     |            |     |       |     |            |      |       |     |       |      |       |     |        |     |       |     |         |     |       |     |       |      |         |      |       |     |       |        |        |     |       |     |       |      |       |        |        |     |       |         |         |    |       |          |        |     |       |        |        |     |       |         |                                                                                                                                                                                                                                                                                                                                                                                                                                                                                                               |           |        |           |            |            |           |              |             |            |                                                                                       |                 |                                                                              |
| ndcols= 16                                                                                                                                                                                                                                                                                                                                                                                                                                                                                                                                                                                                                                                                                                                                                                                                                                                                                                                                                                                                                                                                                                                                                                                                                                                                                                                              |                      |         |               |            |                          |        |        |        |                        |        |        |       |                                                                                    |      |         |               |                    |      |       |     |            |     |       |     |           |      |       |     |            |     |       |     |            |      |       |     |       |      |       |     |        |     |       |     |         |     |       |     |       |      |         |      |       |     |       |        |        |     |       |     |       |      |       |        |        |     |       |         |         |    |       |          |        |     |       |        |        |     |       |         |                                                                                                                                                                                                                                                                                                                                                                                                                                                                                                               |           |        |           |            |            |           |              |             |            |                                                                                       |                 |                                                                              |
| ndrows= 20                                                                                                                                                                                                                                                                                                                                                                                                                                                                                                                                                                                                                                                                                                                                                                                                                                                                                                                                                                                                                                                                                                                                                                                                                                                                                                                              |                      |         |               |            |                          |        |        |        |                        |        |        |       |                                                                                    |      |         |               |                    |      |       |     |            |     |       |     |           |      |       |     |            |     |       |     |            |      |       |     |       |      |       |     |        |     |       |     |         |     |       |     |       |      |         |      |       |     |       |        |        |     |       |     |       |      |       |        |        |     |       |         |         |    |       |          |        |     |       |        |        |     |       |         |                                                                                                                                                                                                                                                                                                                                                                                                                                                                                                               |           |        |           |            |            |           |              |             |            |                                                                                       |                 |                                                                              |
| ndslic= 1                                                                                                                                                                                                                                                                                                                                                                                                                                                                                                                                                                                                                                                                                                                                                                                                                                                                                                                                                                                                                                                                                                                                                                                                                                                                                                                               |                      |         |               |            |                          |        |        |        |                        |        |        |       |                                                                                    |      |         |               |                    |      |       |     |            |     |       |     |           |      |       |     |            |     |       |     |            |      |       |     |       |      |       |     |        |     |       |     |         |     |       |     |       |      |         |      |       |     |       |        |        |     |       |     |       |      |       |        |        |     |       |         |         |    |       |          |        |     |       |        |        |     |       |         |                                                                                                                                                                                                                                                                                                                                                                                                                                                                                                               |           |        |           |            |            |           |              |             |            |                                                                                       |                 |                                                                              |
| nunfil= 1024                                                                                                                                                                                                                                                                                                                                                                                                                                                                                                                                                                                                                                                                                                                                                                                                                                                                                                                                                                                                                                                                                                                                                                                                                                                                                                                            |                      |         |               |            |                          |        |        |        |                        |        |        |       |                                                                                    |      |         |               |                    |      |       |     |            |     |       |     |           |      |       |     |            |     |       |     |            |      |       |     |       |      |       |     |        |     |       |     |         |     |       |     |       |      |         |      |       |     |       |        |        |     |       |     |       |      |       |        |        |     |       |         |         |    |       |          |        |     |       |        |        |     |       |         |                                                                                                                                                                                                                                                                                                                                                                                                                                                                                                               |           |        |           |            |            |           |              |             |            |                                                                                       |                 |                                                                              |
| ppmend= 1.0                                                                                                                                                                                                                                                                                                                                                                                                                                                                                                                                                                                                                                                                                                                                                                                                                                                                                                                                                                                                                                                                                                                                                                                                                                                                                                                             |                      |         |               |            |                          |        |        |        |                        |        |        |       |                                                                                    |      |         |               |                    |      |       |     |            |     |       |     |           |      |       |     |            |     |       |     |            |      |       |     |       |      |       |     |        |     |       |     |         |     |       |     |       |      |         |      |       |     |       |        |        |     |       |     |       |      |       |        |        |     |       |         |         |    |       |          |        |     |       |        |        |     |       |         |                                                                                                                                                                                                                                                                                                                                                                                                                                                                                                               |           |        |           |            |            |           |              |             |            |                                                                                       |                 |                                                                              |
| ppmst= 4.0                                                                                                                                                                                                                                                                                                                                                                                                                                                                                                                                                                                                                                                                                                                                                                                                                                                                                                                                                                                                                                                                                                                                                                                                                                                                                                                              |                      |         |               |            |                          |        |        |        |                        |        |        |       |                                                                                    |      |         |               |                    |      |       |     |            |     |       |     |           |      |       |     |            |     |       |     |            |      |       |     |       |      |       |     |        |     |       |     |         |     |       |     |       |      |         |      |       |     |       |        |        |     |       |     |       |      |       |        |        |     |       |         |         |    |       |          |        |     |       |        |        |     |       |         |                                                                                                                                                                                                                                                                                                                                                                                                                                                                                                               |           |        |           |            |            |           |              |             |            |                                                                                       |                 |                                                                              |
| savdir= '/home/stu111733/.lcmodel/saved/MR_Hirn_funktionell/s12/2019.04.26_14:02:53/'                                                                                                                                                                                                                                                                                                                                                                                                                                                                                                                                                                                                                                                                                                                                                                                                                                                                                                                                                                                                                                                                                                                                                                                                                                                   |                      |         |               |            |                          |        |        |        |                        |        |        |       |                                                                                    |      |         |               |                    |      |       |     |            |     |       |     |           |      |       |     |            |     |       |     |            |      |       |     |       |      |       |     |        |     |       |     |         |     |       |     |       |      |         |      |       |     |       |        |        |     |       |     |       |      |       |        |        |     |       |         |         |    |       |          |        |     |       |        |        |     |       |         |                                                                                                                                                                                                                                                                                                                                                                                                                                                                                                               |           |        |           |            |            |           |              |             |            |                                                                                       |                 |                                                                              |
| sptype= 'tumor'                                                                                                                                                                                                                                                                                                                                                                                                                                                                                                                                                                                                                                                                                                                                                                                                                                                                                                                                                                                                                                                                                                                                                                                                                                                                                                                         |                      |         |               |            |                          |        |        |        |                        |        |        |       |                                                                                    |      |         |               |                    |      |       |     |            |     |       |     |           |      |       |     |            |     |       |     |            |      |       |     |       |      |       |     |        |     |       |     |         |     |       |     |       |      |         |      |       |     |       |        |        |     |       |     |       |      |       |        |        |     |       |         |         |    |       |          |        |     |       |        |        |     |       |         |                                                                                                                                                                                                                                                                                                                                                                                                                                                                                                               |           |        |           |            |            |           |              |             |            |                                                                                       |                 |                                                                              |
| srcraw= '/home/data/Studies/GBM_Spektro/data/s12_ff/DBIEX_11_1_raw_act.SDAT'                                                                                                                                                                                                                                                                                                                                                                                                                                                                                                                                                                                                                                                                                                                                                                                                                                                                                                                                                                                                                                                                                                                                                                                                                                                            |                      |         |               |            |                          |        |        |        |                        |        |        |       |                                                                                    |      |         |               |                    |      |       |     |            |     |       |     |           |      |       |     |            |     |       |     |            |      |       |     |       |      |       |     |        |     |       |     |         |     |       |     |       |      |         |      |       |     |       |        |        |     |       |     |       |      |       |        |        |     |       |         |         |    |       |          |        |     |       |        |        |     |       |         |                                                                                                                                                                                                                                                                                                                                                                                                                                                                                                               |           |        |           |            |            |           |              |             |            |                                                                                       |                 |                                                                              |
| <table><tr><td>9.10E-05</td><td>999%</td><td>4.0E-06</td><td>Lip13a</td></tr><tr><td>0.000</td><td>999%</td><td>0.000</td><td>Lip13b</td></tr><tr><td>0.000</td><td>999%</td><td>0.000</td><td>Lip20</td></tr><tr><td>9.10E-05</td><td>999%</td><td>4.0E-06</td><td>Lip13a+Lip13b</td></tr></table>                                                                                                                                                                                                                                                                                                                                                                                                                                                                                                                                                                                                                                                                                                                                                                                                                                                                                                                                                                                                                                     | 9.10E-05             | 999%    | 4.0E-06       | Lip13a     | 0.000                    | 999%   | 0.000  | Lip13b | 0.000                  | 999%   | 0.000  | Lip20 | 9.10E-05                                                                           | 999% | 4.0E-06 | Lip13a+Lip13b |                    |      |       |     |            |     |       |     |           |      |       |     |            |     |       |     |            |      |       |     |       |      |       |     |        |     |       |     |         |     |       |     |       |      |         |      |       |     |       |        |        |     |       |     |       |      |       |        |        |     |       |         |         |    |       |          |        |     |       |        |        |     |       |         |                                                                                                                                                                                                                                                                                                                                                                                                                                                                                                               |           |        |           |            |            |           |              |             |            |                                                                                       |                 |                                                                              |
| 9.10E-05                                                                                                                                                                                                                                                                                                                                                                                                                                                                                                                                                                                                                                                                                                                                                                                                                                                                                                                                                                                                                                                                                                                                                                                                                                                                                                                                | 999%                 | 4.0E-06 | Lip13a        |            |                          |        |        |        |                        |        |        |       |                                                                                    |      |         |               |                    |      |       |     |            |     |       |     |           |      |       |     |            |     |       |     |            |      |       |     |       |      |       |     |        |     |       |     |         |     |       |     |       |      |         |      |       |     |       |        |        |     |       |     |       |      |       |        |        |     |       |         |         |    |       |          |        |     |       |        |        |     |       |         |                                                                                                                                                                                                                                                                                                                                                                                                                                                                                                               |           |        |           |            |            |           |              |             |            |                                                                                       |                 |                                                                              |
| 0.000                                                                                                                                                                                                                                                                                                                                                                                                                                                                                                                                                                                                                                                                                                                                                                                                                                                                                                                                                                                                                                                                                                                                                                                                                                                                                                                                   | 999%                 | 0.000   | Lip13b        |            |                          |        |        |        |                        |        |        |       |                                                                                    |      |         |               |                    |      |       |     |            |     |       |     |           |      |       |     |            |     |       |     |            |      |       |     |       |      |       |     |        |     |       |     |         |     |       |     |       |      |         |      |       |     |       |        |        |     |       |     |       |      |       |        |        |     |       |         |         |    |       |          |        |     |       |        |        |     |       |         |                                                                                                                                                                                                                                                                                                                                                                                                                                                                                                               |           |        |           |            |            |           |              |             |            |                                                                                       |                 |                                                                              |
| 0.000                                                                                                                                                                                                                                                                                                                                                                                                                                                                                                                                                                                                                                                                                                                                                                                                                                                                                                                                                                                                                                                                                                                                                                                                                                                                                                                                   | 999%                 | 0.000   | Lip20         |            |                          |        |        |        |                        |        |        |       |                                                                                    |      |         |               |                    |      |       |     |            |     |       |     |           |      |       |     |            |     |       |     |            |      |       |     |       |      |       |     |        |     |       |     |         |     |       |     |       |      |         |      |       |     |       |        |        |     |       |     |       |      |       |        |        |     |       |         |         |    |       |          |        |     |       |        |        |     |       |         |                                                                                                                                                                                                                                                                                                                                                                                                                                                                                                               |           |        |           |            |            |           |              |             |            |                                                                                       |                 |                                                                              |
| 9.10E-05                                                                                                                                                                                                                                                                                                                                                                                                                                                                                                                                                                                                                                                                                                                                                                                                                                                                                                                                                                                                                                                                                                                                                                                                                                                                                                                                | 999%                 | 4.0E-06 | Lip13a+Lip13b |            |                          |        |        |        |                        |        |        |       |                                                                                    |      |         |               |                    |      |       |     |            |     |       |     |           |      |       |     |            |     |       |     |            |      |       |     |       |      |       |     |        |     |       |     |         |     |       |     |       |      |         |      |       |     |       |        |        |     |       |     |       |      |       |        |        |     |       |         |         |    |       |          |        |     |       |        |        |     |       |         |                                                                                                                                                                                                                                                                                                                                                                                                                                                                                                               |           |        |           |            |            |           |              |             |            |                                                                                       |                 |                                                                              |
| <table><tr><th colspan="4">DIAGNOSTICS</th></tr><tr><td>7</td><td>info's</td><td>RFALSI</td><td>11</td></tr><tr><td>2</td><td>info's</td><td>RFALSI</td><td>4</td></tr></table>                                                                                                                                                                                                                                                                                                                                                                                                                                                                                                                                                                                                                                                                                                                                                                                                                                                                                                                                                                                                                                                                                                                                                         | DIAGNOSTICS          |         |               |            | 7                        | info's | RFALSI | 11     | 2                      | info's | RFALSI | 4     |                                                                                    |      |         |               |                    |      |       |     |            |     |       |     |           |      |       |     |            |     |       |     |            |      |       |     |       |      |       |     |        |     |       |     |         |     |       |     |       |      |         |      |       |     |       |        |        |     |       |     |       |      |       |        |        |     |       |         |         |    |       |          |        |     |       |        |        |     |       |         |                                                                                                                                                                                                                                                                                                                                                                                                                                                                                                               |           |        |           |            |            |           |              |             |            |                                                                                       |                 |                                                                              |
| DIAGNOSTICS                                                                                                                                                                                                                                                                                                                                                                                                                                                                                                                                                                                                                                                                                                                                                                                                                                                                                                                                                                                                                                                                                                                                                                                                                                                                                                                             |                      |         |               |            |                          |        |        |        |                        |        |        |       |                                                                                    |      |         |               |                    |      |       |     |            |     |       |     |           |      |       |     |            |     |       |     |            |      |       |     |       |      |       |     |        |     |       |     |         |     |       |     |       |      |         |      |       |     |       |        |        |     |       |     |       |      |       |        |        |     |       |         |         |    |       |          |        |     |       |        |        |     |       |         |                                                                                                                                                                                                                                                                                                                                                                                                                                                                                                               |           |        |           |            |            |           |              |             |            |                                                                                       |                 |                                                                              |
| 7                                                                                                                                                                                                                                                                                                                                                                                                                                                                                                                                                                                                                                                                                                                                                                                                                                                                                                                                                                                                                                                                                                                                                                                                                                                                                                                                       | info's               | RFALSI  | 11            |            |                          |        |        |        |                        |        |        |       |                                                                                    |      |         |               |                    |      |       |     |            |     |       |     |           |      |       |     |            |     |       |     |            |      |       |     |       |      |       |     |        |     |       |     |         |     |       |     |       |      |         |      |       |     |       |        |        |     |       |     |       |      |       |        |        |     |       |         |         |    |       |          |        |     |       |        |        |     |       |         |                                                                                                                                                                                                                                                                                                                                                                                                                                                                                                               |           |        |           |            |            |           |              |             |            |                                                                                       |                 |                                                                              |
| 2                                                                                                                                                                                                                                                                                                                                                                                                                                                                                                                                                                                                                                                                                                                                                                                                                                                                                                                                                                                                                                                                                                                                                                                                                                                                                                                                       | info's               | RFALSI  | 4             |            |                          |        |        |        |                        |        |        |       |                                                                                    |      |         |               |                    |      |       |     |            |     |       |     |           |      |       |     |            |     |       |     |            |      |       |     |       |      |       |     |        |     |       |     |         |     |       |     |       |      |         |      |       |     |       |        |        |     |       |     |       |      |       |        |        |     |       |         |         |    |       |          |        |     |       |        |        |     |       |         |                                                                                                                                                                                                                                                                                                                                                                                                                                                                                                               |           |        |           |            |            |           |              |             |            |                                                                                       |                 |                                                                              |
| <table><tr><th colspan="4">MISCELLANEOUS OUTPUT</th></tr><tr><td colspan="4">FWHM = 0.061 ppm S/N = 3</td></tr><tr><td colspan="4">Data shift = 0.015 ppm</td></tr><tr><td colspan="4">Ph: -5 deg -8.5 deg/ppm</td></tr></table>                                                                                                                                                                                                                                                                                                                                                                                                                                                                                                                                                                                                                                                                                                                                                                                                                                                                                                                                                                                                                                                                                                        | MISCELLANEOUS OUTPUT |         |               |            | FWHM = 0.061 ppm S/N = 3 |        |        |        | Data shift = 0.015 ppm |        |        |       | Ph: -5 deg -8.5 deg/ppm                                                            |      |         |               |                    |      |       |     |            |     |       |     |           |      |       |     |            |     |       |     |            |      |       |     |       |      |       |     |        |     |       |     |         |     |       |     |       |      |         |      |       |     |       |        |        |     |       |     |       |      |       |        |        |     |       |         |         |    |       |          |        |     |       |        |        |     |       |         |                                                                                                                                                                                                                                                                                                                                                                                                                                                                                                               |           |        |           |            |            |           |              |             |            |                                                                                       |                 |                                                                              |
| MISCELLANEOUS OUTPUT                                                                                                                                                                                                                                                                                                                                                                                                                                                                                                                                                                                                                                                                                                                                                                                                                                                                                                                                                                                                                                                                                                                                                                                                                                                                                                                    |                      |         |               |            |                          |        |        |        |                        |        |        |       |                                                                                    |      |         |               |                    |      |       |     |            |     |       |     |           |      |       |     |            |     |       |     |            |      |       |     |       |      |       |     |        |     |       |     |         |     |       |     |       |      |         |      |       |     |       |        |        |     |       |     |       |      |       |        |        |     |       |         |         |    |       |          |        |     |       |        |        |     |       |         |                                                                                                                                                                                                                                                                                                                                                                                                                                                                                                               |           |        |           |            |            |           |              |             |            |                                                                                       |                 |                                                                              |
| FWHM = 0.061 ppm S/N = 3                                                                                                                                                                                                                                                                                                                                                                                                                                                                                                                                                                                                                                                                                                                                                                                                                                                                                                                                                                                                                                                                                                                                                                                                                                                                                                                |                      |         |               |            |                          |        |        |        |                        |        |        |       |                                                                                    |      |         |               |                    |      |       |     |            |     |       |     |           |      |       |     |            |     |       |     |            |      |       |     |       |      |       |     |        |     |       |     |         |     |       |     |       |      |         |      |       |     |       |        |        |     |       |     |       |      |       |        |        |     |       |         |         |    |       |          |        |     |       |        |        |     |       |         |                                                                                                                                                                                                                                                                                                                                                                                                                                                                                                               |           |        |           |            |            |           |              |             |            |                                                                                       |                 |                                                                              |
| Data shift = 0.015 ppm                                                                                                                                                                                                                                                                                                                                                                                                                                                                                                                                                                                                                                                                                                                                                                                                                                                                                                                                                                                                                                                                                                                                                                                                                                                                                                                  |                      |         |               |            |                          |        |        |        |                        |        |        |       |                                                                                    |      |         |               |                    |      |       |     |            |     |       |     |           |      |       |     |            |     |       |     |            |      |       |     |       |      |       |     |        |     |       |     |         |     |       |     |       |      |         |      |       |     |       |        |        |     |       |     |       |      |       |        |        |     |       |         |         |    |       |          |        |     |       |        |        |     |       |         |                                                                                                                                                                                                                                                                                                                                                                                                                                                                                                               |           |        |           |            |            |           |              |             |            |                                                                                       |                 |                                                                              |
| Ph: -5 deg -8.5 deg/ppm                                                                                                                                                                                                                                                                                                                                                                                                                                                                                                                                                                                                                                                                                                                                                                                                                                                                                                                                                                                                                                                                                                                                                                                                                                                                                                                 |                      |         |               |            |                          |        |        |        |                        |        |        |       |                                                                                    |      |         |               |                    |      |       |     |            |     |       |     |           |      |       |     |            |     |       |     |            |      |       |     |       |      |       |     |        |     |       |     |         |     |       |     |       |      |         |      |       |     |       |        |        |     |       |     |       |      |       |        |        |     |       |         |         |    |       |          |        |     |       |        |        |     |       |         |                                                                                                                                                                                                                                                                                                                                                                                                                                                                                                               |           |        |           |            |            |           |              |             |            |                                                                                       |                 |                                                                              |
| <table><tr><th colspan="4">INPUT CHANGES</th></tr><tr><td colspan="4">deltat= 5.000e-04</td></tr><tr><td colspan="4">echot= 288.00</td></tr><tr><td colspan="4">filbas= '/home/stu111733/.lcmodel/basis-sets/gam_ma_press_te288_128mhz_662d.basis'</td></tr><tr><td colspan="4">hzpppm= 1.2776e+02</td></tr><tr><td colspan="4">icolen= 13</td></tr><tr><td colspan="4">icolst= 9</td></tr><tr><td colspan="4">irowen= 11</td></tr><tr><td colspan="4">irowst= 10</td></tr></table>                                                                                                                                                                                                                                                                                                                                                                                                                                                                                                                                                                                                                                                                                                                                                                                                                                                     | INPUT CHANGES        |         |               |            | deltat= 5.000e-04        |        |        |        | echot= 288.00          |        |        |       | filbas= '/home/stu111733/.lcmodel/basis-sets/gam_ma_press_te288_128mhz_662d.basis' |      |         |               | hzpppm= 1.2776e+02 |      |       |     | icolen= 13 |     |       |     | icolst= 9 |      |       |     | irowen= 11 |     |       |     | irowst= 10 |      |       |     |       |      |       |     |        |     |       |     |         |     |       |     |       |      |         |      |       |     |       |        |        |     |       |     |       |      |       |        |        |     |       |         |         |    |       |          |        |     |       |        |        |     |       |         |                                                                                                                                                                                                                                                                                                                                                                                                                                                                                                               |           |        |           |            |            |           |              |             |            |                                                                                       |                 |                                                                              |
| INPUT CHANGES                                                                                                                                                                                                                                                                                                                                                                                                                                                                                                                                                                                                                                                                                                                                                                                                                                                                                                                                                                                                                                                                                                                                                                                                                                                                                                                           |                      |         |               |            |                          |        |        |        |                        |        |        |       |                                                                                    |      |         |               |                    |      |       |     |            |     |       |     |           |      |       |     |            |     |       |     |            |      |       |     |       |      |       |     |        |     |       |     |         |     |       |     |       |      |         |      |       |     |       |        |        |     |       |     |       |      |       |        |        |     |       |         |         |    |       |          |        |     |       |        |        |     |       |         |                                                                                                                                                                                                                                                                                                                                                                                                                                                                                                               |           |        |           |            |            |           |              |             |            |                                                                                       |                 |                                                                              |
| deltat= 5.000e-04                                                                                                                                                                                                                                                                                                                                                                                                                                                                                                                                                                                                                                                                                                                                                                                                                                                                                                                                                                                                                                                                                                                                                                                                                                                                                                                       |                      |         |               |            |                          |        |        |        |                        |        |        |       |                                                                                    |      |         |               |                    |      |       |     |            |     |       |     |           |      |       |     |            |     |       |     |            |      |       |     |       |      |       |     |        |     |       |     |         |     |       |     |       |      |         |      |       |     |       |        |        |     |       |     |       |      |       |        |        |     |       |         |         |    |       |          |        |     |       |        |        |     |       |         |                                                                                                                                                                                                                                                                                                                                                                                                                                                                                                               |           |        |           |            |            |           |              |             |            |                                                                                       |                 |                                                                              |
| echot= 288.00                                                                                                                                                                                                                                                                                                                                                                                                                                                                                                                                                                                                                                                                                                                                                                                                                                                                                                                                                                                                                                                                                                                                                                                                                                                                                                                           |                      |         |               |            |                          |        |        |        |                        |        |        |       |                                                                                    |      |         |               |                    |      |       |     |            |     |       |     |           |      |       |     |            |     |       |     |            |      |       |     |       |      |       |     |        |     |       |     |         |     |       |     |       |      |         |      |       |     |       |        |        |     |       |     |       |      |       |        |        |     |       |         |         |    |       |          |        |     |       |        |        |     |       |         |                                                                                                                                                                                                                                                                                                                                                                                                                                                                                                               |           |        |           |            |            |           |              |             |            |                                                                                       |                 |                                                                              |
| filbas= '/home/stu111733/.lcmodel/basis-sets/gam_ma_press_te288_128mhz_662d.basis'                                                                                                                                                                                                                                                                                                                                                                                                                                                                                                                                                                                                                                                                                                                                                                                                                                                                                                                                                                                                                                                                                                                                                                                                                                                      |                      |         |               |            |                          |        |        |        |                        |        |        |       |                                                                                    |      |         |               |                    |      |       |     |            |     |       |     |           |      |       |     |            |     |       |     |            |      |       |     |       |      |       |     |        |     |       |     |         |     |       |     |       |      |         |      |       |     |       |        |        |     |       |     |       |      |       |        |        |     |       |         |         |    |       |          |        |     |       |        |        |     |       |         |                                                                                                                                                                                                                                                                                                                                                                                                                                                                                                               |           |        |           |            |            |           |              |             |            |                                                                                       |                 |                                                                              |
| hzpppm= 1.2776e+02                                                                                                                                                                                                                                                                                                                                                                                                                                                                                                                                                                                                                                                                                                                                                                                                                                                                                                                                                                                                                                                                                                                                                                                                                                                                                                                      |                      |         |               |            |                          |        |        |        |                        |        |        |       |                                                                                    |      |         |               |                    |      |       |     |            |     |       |     |           |      |       |     |            |     |       |     |            |      |       |     |       |      |       |     |        |     |       |     |         |     |       |     |       |      |         |      |       |     |       |        |        |     |       |     |       |      |       |        |        |     |       |         |         |    |       |          |        |     |       |        |        |     |       |         |                                                                                                                                                                                                                                                                                                                                                                                                                                                                                                               |           |        |           |            |            |           |              |             |            |                                                                                       |                 |                                                                              |
| icolen= 13                                                                                                                                                                                                                                                                                                                                                                                                                                                                                                                                                                                                                                                                                                                                                                                                                                                                                                                                                                                                                                                                                                                                                                                                                                                                                                                              |                      |         |               |            |                          |        |        |        |                        |        |        |       |                                                                                    |      |         |               |                    |      |       |     |            |     |       |     |           |      |       |     |            |     |       |     |            |      |       |     |       |      |       |     |        |     |       |     |         |     |       |     |       |      |         |      |       |     |       |        |        |     |       |     |       |      |       |        |        |     |       |         |         |    |       |          |        |     |       |        |        |     |       |         |                                                                                                                                                                                                                                                                                                                                                                                                                                                                                                               |           |        |           |            |            |           |              |             |            |                                                                                       |                 |                                                                              |
| icolst= 9                                                                                                                                                                                                                                                                                                                                                                                                                                                                                                                                                                                                                                                                                                                                                                                                                                                                                                                                                                                                                                                                                                                                                                                                                                                                                                                               |                      |         |               |            |                          |        |        |        |                        |        |        |       |                                                                                    |      |         |               |                    |      |       |     |            |     |       |     |           |      |       |     |            |     |       |     |            |      |       |     |       |      |       |     |        |     |       |     |         |     |       |     |       |      |         |      |       |     |       |        |        |     |       |     |       |      |       |        |        |     |       |         |         |    |       |          |        |     |       |        |        |     |       |         |                                                                                                                                                                                                                                                                                                                                                                                                                                                                                                               |           |        |           |            |            |           |              |             |            |                                                                                       |                 |                                                                              |
| irowen= 11                                                                                                                                                                                                                                                                                                                                                                                                                                                                                                                                                                                                                                                                                                                                                                                                                                                                                                                                                                                                                                                                                                                                                                                                                                                                                                                              |                      |         |               |            |                          |        |        |        |                        |        |        |       |                                                                                    |      |         |               |                    |      |       |     |            |     |       |     |           |      |       |     |            |     |       |     |            |      |       |     |       |      |       |     |        |     |       |     |         |     |       |     |       |      |         |      |       |     |       |        |        |     |       |     |       |      |       |        |        |     |       |         |         |    |       |          |        |     |       |        |        |     |       |         |                                                                                                                                                                                                                                                                                                                                                                                                                                                                                                               |           |        |           |            |            |           |              |             |            |                                                                                       |                 |                                                                              |
| irowst= 10                                                                                                                                                                                                                                                                                                                                                                                                                                                                                                                                                                                                                                                                                                                                                                                                                                                                                                                                                                                                                                                                                                                                                                                                                                                                                                                              |                      |         |               |            |                          |        |        |        |                        |        |        |       |                                                                                    |      |         |               |                    |      |       |     |            |     |       |     |           |      |       |     |            |     |       |     |            |      |       |     |       |      |       |     |        |     |       |     |         |     |       |     |       |      |         |      |       |     |       |        |        |     |       |     |       |      |       |        |        |     |       |         |         |    |       |          |        |     |       |        |        |     |       |         |                                                                                                                                                                                                                                                                                                                                                                                                                                                                                                               |           |        |           |            |            |           |              |             |            |                                                                                       |                 |                                                                              |

P44 - tumor  
voxel 11;5

Row#11 Col#5 MR Hirn (2018.11.14 09:25:43) Subject 14 8.00e-01 mL, TE/TR/NS=288/1500/1 (s2DSI\_TE288 TR1500)

Data of: Sektion Biomedizinische Bildgebung, Christian-Albrechts-Universitaet zu Kiel

LCModel (Version 6.3-1J) Copyright: S.W. Provencher.

Ref.: Magn. Reson. Med. 30:672-679 (1993).

19-June-2019 17:28

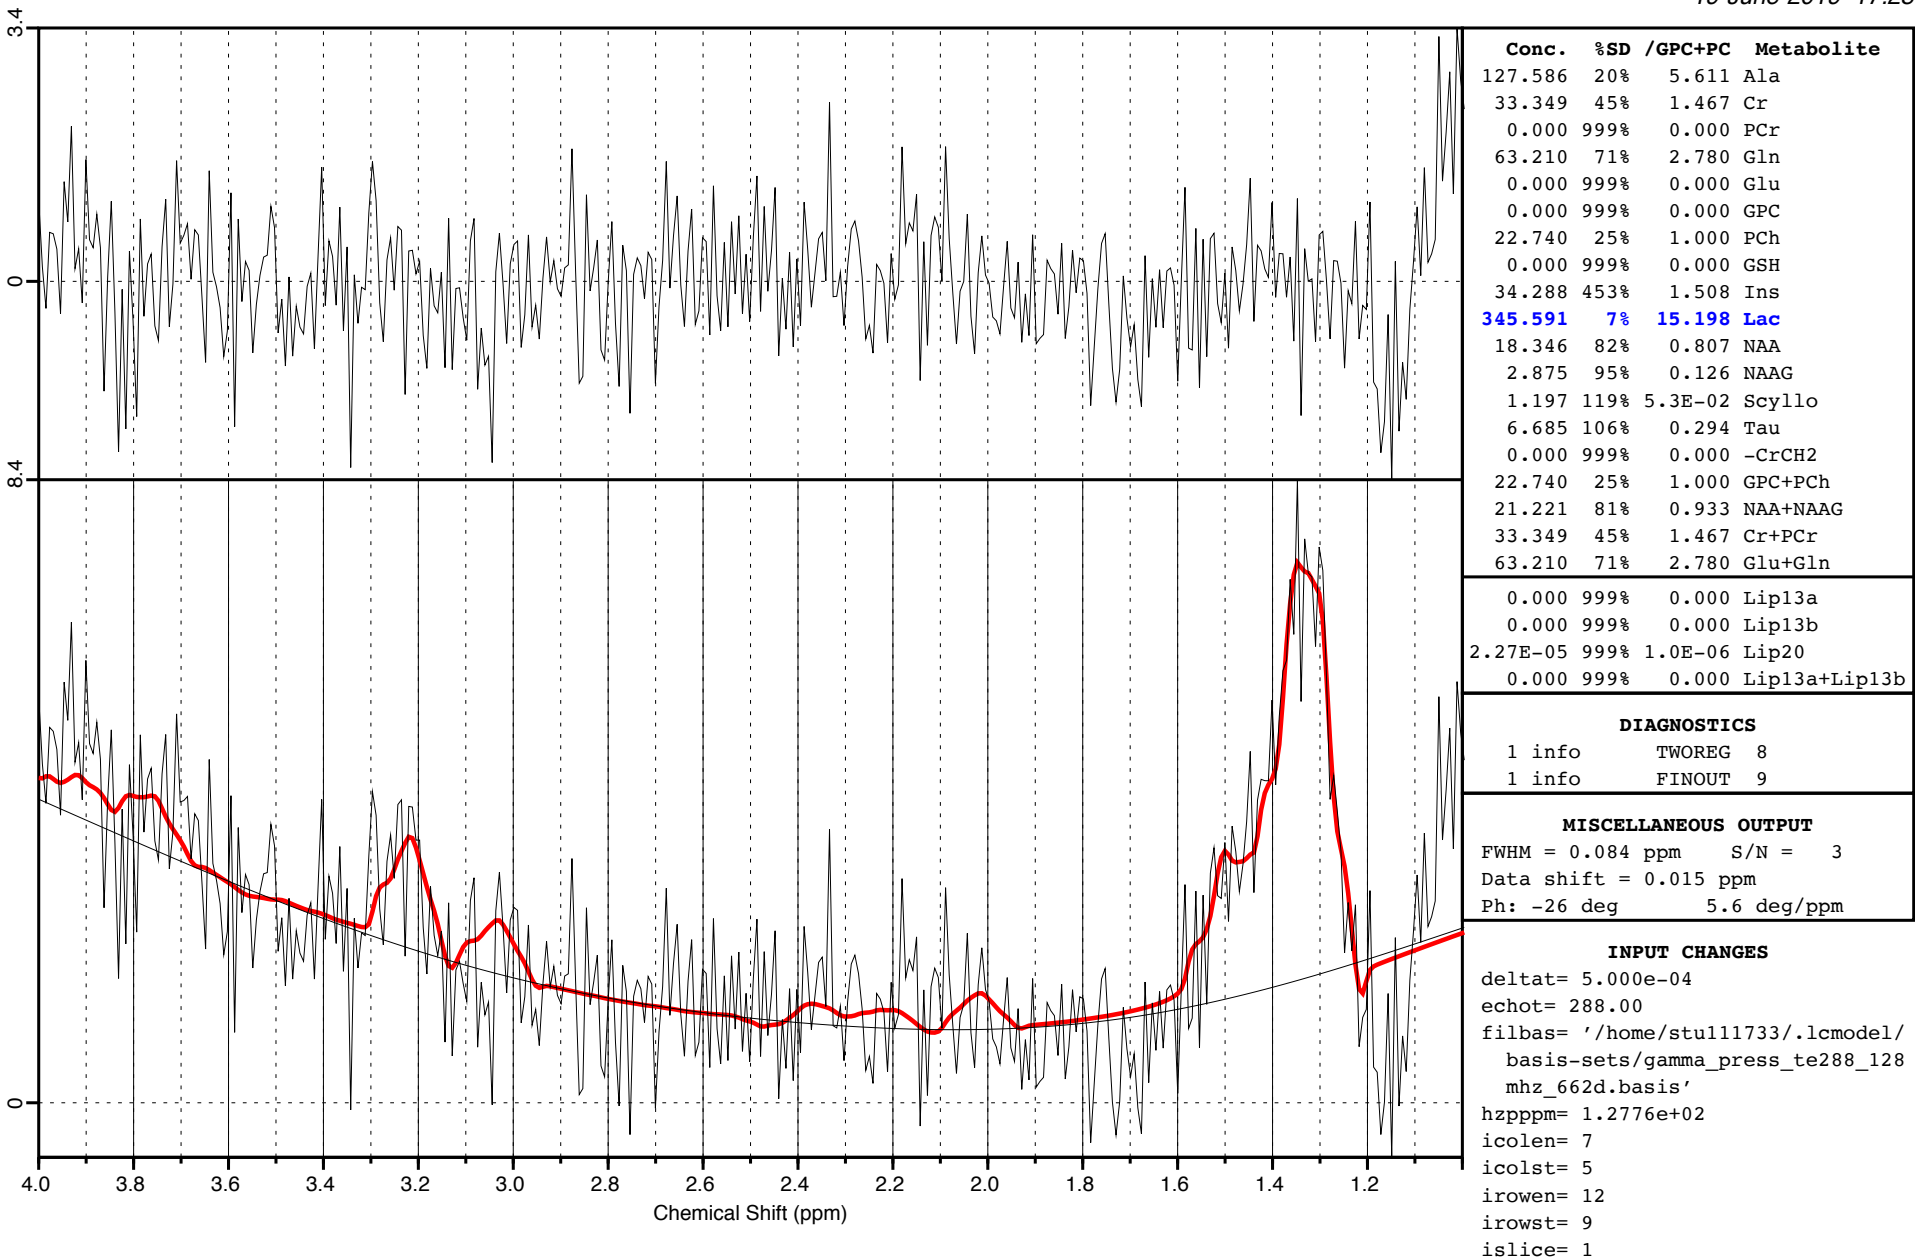

P44 - tumor  
voxel 11;5

Row#11 Col#5 MR Hirn (2018.11.14 09:25:43) Subject 14 8.00e-01 mL, TE/TR/NS=288/1500/1 (s2DSI\_TE288 TR1500)

Data of: *Sektion Biomedizinische Bildgebung, Christian-Albrechts-Universitaet zu Kiel*

LCModel (Version 6.3-1J) Copyright: S.W. Provencher.      Ref.: Magn. Reson. Med. 30:672-679 (1993).

19-June-2019 17:28

|                                                                                                                                                                                                                                                                                                                                                                                                                                                                                                                                                                                                                                                                                                                                                                                                                                                                                                                                                                                                                                                                                                                                                                                                                                                                                                                                                                                           |                                                                                                                                                                                                                                                                                                                                                                                                              |
|-------------------------------------------------------------------------------------------------------------------------------------------------------------------------------------------------------------------------------------------------------------------------------------------------------------------------------------------------------------------------------------------------------------------------------------------------------------------------------------------------------------------------------------------------------------------------------------------------------------------------------------------------------------------------------------------------------------------------------------------------------------------------------------------------------------------------------------------------------------------------------------------------------------------------------------------------------------------------------------------------------------------------------------------------------------------------------------------------------------------------------------------------------------------------------------------------------------------------------------------------------------------------------------------------------------------------------------------------------------------------------------------|--------------------------------------------------------------------------------------------------------------------------------------------------------------------------------------------------------------------------------------------------------------------------------------------------------------------------------------------------------------------------------------------------------------|
| <div><div><div><div><div>Conc.</div><div>%SD</div><div>/GPC+PC</div><div>Metabolite</div></div><div>127.58620%5.611Ala</div><div>33.34945%1.467Cr</div><div>0.000999%0.000PCr</div><div>63.21071%2.780Gln</div><div>0.000999%0.000Glu</div><div>0.000999%0.000GPC</div><div>22.74025%1.000PCh</div><div>0.000999%0.000GSH</div><div>34.288453%1.508Ins</div><div>345.5917%15.198Lac</div><div>18.34682%0.807NAA</div><div>2.87595%0.126NAAG</div><div>1.197119%5.3E-02Scyllo</div><div>6.685106%0.294Tau</div><div>0.000999%0.000-CrCH2</div><div>22.74025%1.000GPC+PCh</div><div>21.22181%0.933NAA+NAAG</div><div>33.34945%1.467Cr+PCr</div><div>63.21071%2.780Glu+Gln</div></div><div><div>0.000999%0.000Lip13a</div><div>0.000999%0.000Lip13b</div><div>2.27E-05999%1.0E-06Lip20</div><div>0.000999%0.000Lip13a+Lip13b</div></div></div></div> <div><div>DIAGNOSTICS</div><div>1 infoTWOREG8</div><div>1 infoFINOUT9</div></div> <div><div>MISCELLANEOUS OUTPUT</div><div>FWHM = 0.084 ppmS/N = 3</div><div>Data shift = 0.015 ppm</div><div>Ph: -26 deg5.6 deg/ppm</div></div> <div><div>INPUT CHANGES</div><div>deltat= 5.000e-04</div><div>echot= 288.00</div><div>filbas= '/home/stu111733/.lcmodel/basis-sets/gam<br/>ma_press_te288_128mhz_662d.basis'</div><div>hzpppm= 1.2776e+02</div><div>icolen= 7</div><div>icolst= 5</div><div>irowen= 12</div><div>irowst= 9</div></div> | <div><div>islice= 1</div><div>lps= 8</div><div>ltable= 7</div><div>ndcols= 16</div><div>ndrows= 20</div><div>ndslic= 1</div><div>nunfil= 1024</div><div>ppmend= 1.0</div><div>ppmst= 4.0</div><div>savdir= '/home/data/Studies/GBM_Spektro/<br/>results/s14/'</div><div>sptype= 'tumor'</div><div>srcraw= '/home/data/Studies/GBM_Spektro/data/<br/>s14/01/spectro01/spectro01_8_1_raw_act.SDAT'</div></div> |
|-------------------------------------------------------------------------------------------------------------------------------------------------------------------------------------------------------------------------------------------------------------------------------------------------------------------------------------------------------------------------------------------------------------------------------------------------------------------------------------------------------------------------------------------------------------------------------------------------------------------------------------------------------------------------------------------------------------------------------------------------------------------------------------------------------------------------------------------------------------------------------------------------------------------------------------------------------------------------------------------------------------------------------------------------------------------------------------------------------------------------------------------------------------------------------------------------------------------------------------------------------------------------------------------------------------------------------------------------------------------------------------------|--------------------------------------------------------------------------------------------------------------------------------------------------------------------------------------------------------------------------------------------------------------------------------------------------------------------------------------------------------------------------------------------------------------|

# P44 - edema voxel 8;5

Row#8 Col#5 MR Hirn (2018.11.14 09:25:43) Subject 14 8.00e-01 mL, TE/TR/NS=288/1500/1 (s2DSI\_TE288 TR1500)

Data of: Sektion Biomedizinische Bildgebung, Christian-Albrechts-Universitaet zu Kiel

LCModel (Version 6.3-1J) Copyright: S.W. Provencher.

Ref.: Magn. Reson. Med. 30:672-679 (1993).

28-November-2019 14:47

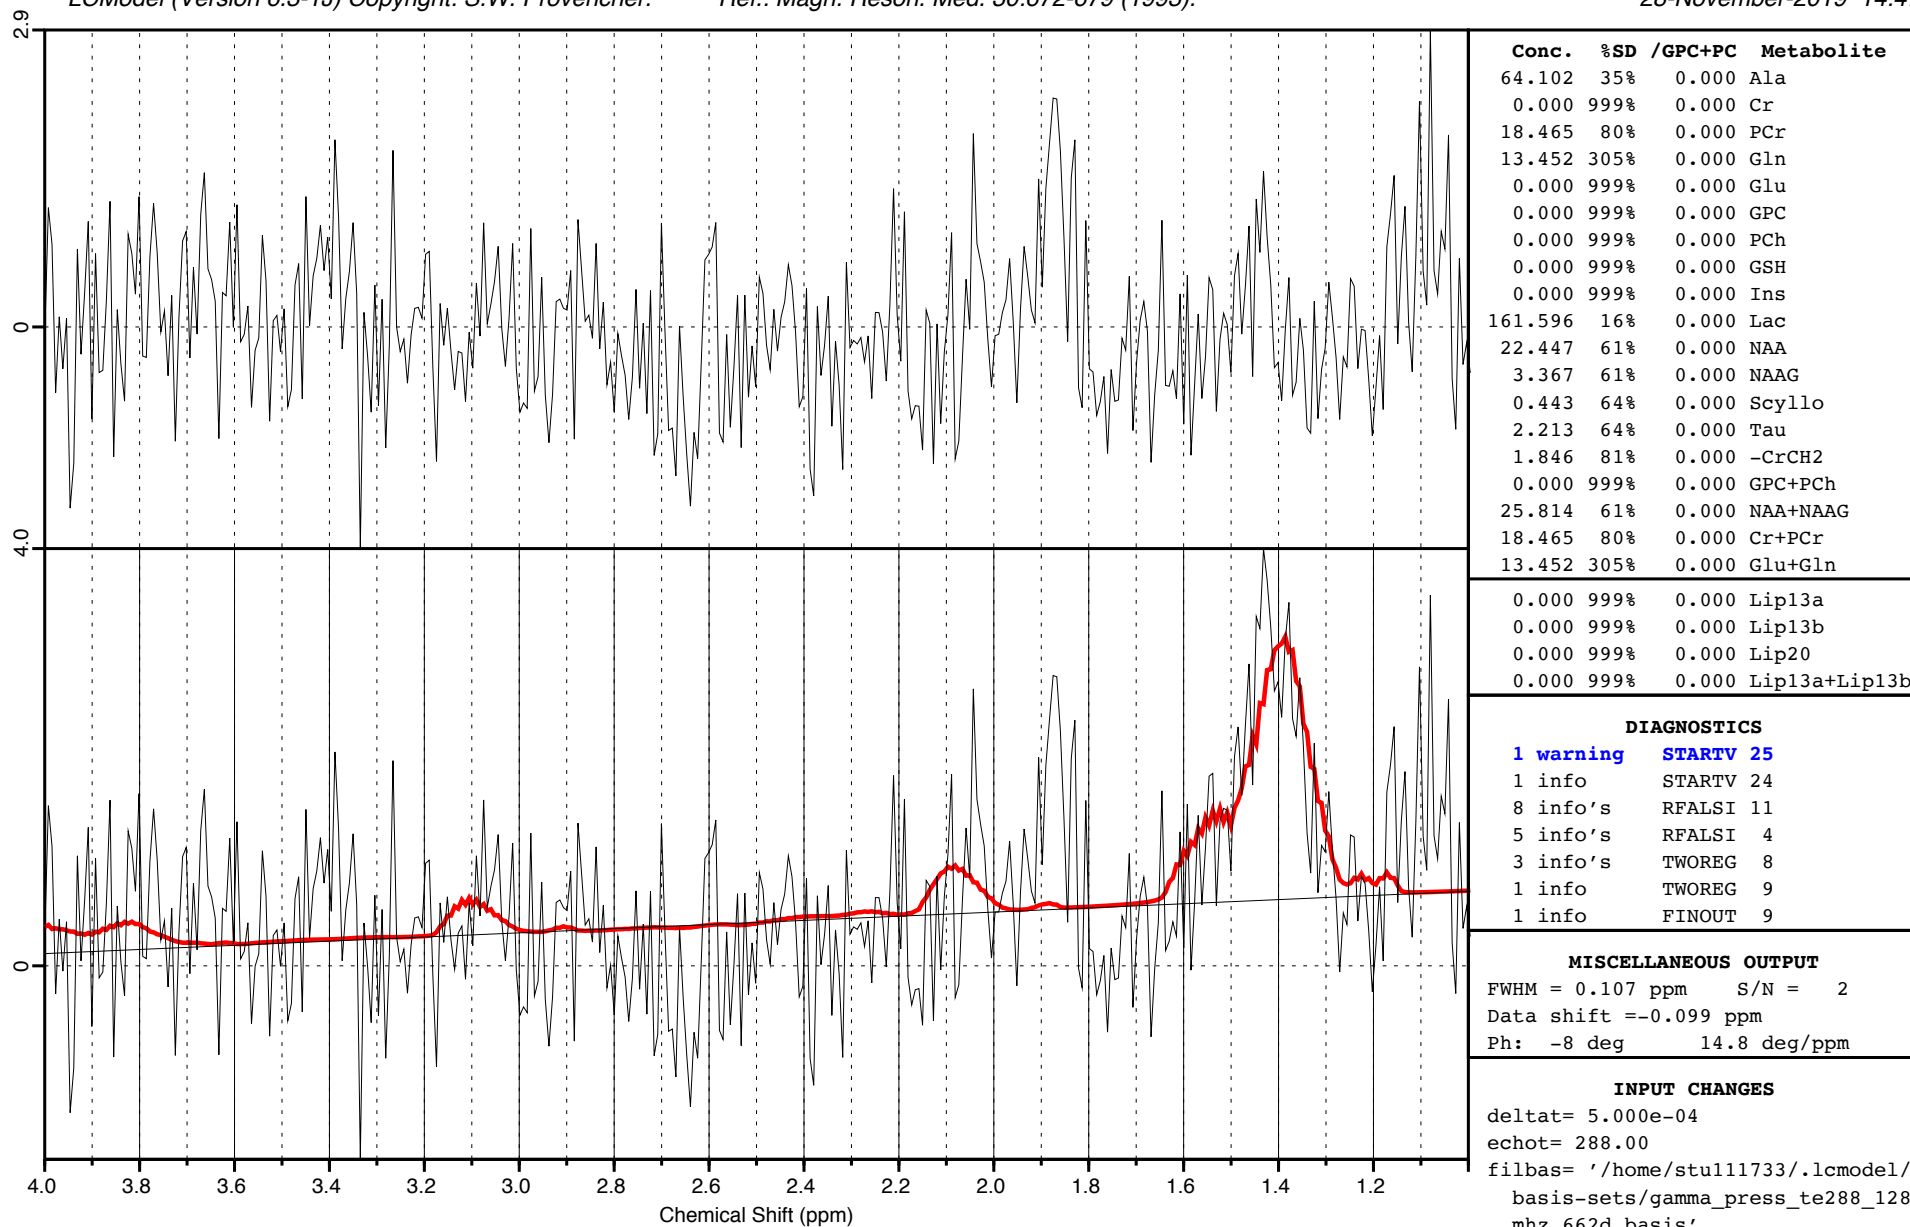

| Conc.   | %SD  | /GPC+PC | Metabolite    |
|---------|------|---------|---------------|
| 64.102  | 35%  | 0.000   | Ala           |
| 0.000   | 99%  | 0.000   | Cr            |
| 18.465  | 80%  | 0.000   | PCr           |
| 13.452  | 305% | 0.000   | Gln           |
| 0.000   | 99%  | 0.000   | Glu           |
| 0.000   | 99%  | 0.000   | GPC           |
| 0.000   | 99%  | 0.000   | PCh           |
| 0.000   | 99%  | 0.000   | GSH           |
| 0.000   | 99%  | 0.000   | Ins           |
| 161.596 | 16%  | 0.000   | Lac           |
| 22.447  | 61%  | 0.000   | NAA           |
| 3.367   | 61%  | 0.000   | NAAG          |
| 0.443   | 64%  | 0.000   | Scyllo        |
| 2.213   | 64%  | 0.000   | Tau           |
| 1.846   | 81%  | 0.000   | -CrCH2        |
| 0.000   | 99%  | 0.000   | GPC+PCh       |
| 25.814  | 61%  | 0.000   | NAA+NAAG      |
| 18.465  | 80%  | 0.000   | Cr+PCr        |
| 13.452  | 305% | 0.000   | Glu+Gln       |
| 0.000   | 99%  | 0.000   | Lip13a        |
| 0.000   | 99%  | 0.000   | Lip13b        |
| 0.000   | 99%  | 0.000   | Lip20         |
| 0.000   | 99%  | 0.000   | Lip13a+Lip13b |

| DIAGNOSTICS |        |    |
|-------------|--------|----|
| 1 warning   | STARTV | 25 |
| 1 info      | STARTV | 24 |
| 8 info's    | RFALSI | 11 |
| 5 info's    | RFALSI | 4  |
| 3 info's    | TWOREG | 8  |
| 1 info      | TWOREG | 9  |
| 1 info      | FINOUT | 9  |

| MISCELLANEOUS OUTPUT |              |              |
|----------------------|--------------|--------------|
| FWHM                 | = 0.107 ppm  | S/N = 2      |
| Data shift           | = -0.099 ppm |              |
| Ph:                  | -8 deg       | 14.8 deg/ppm |

| INPUT CHANGES |                                                                                    |  |
|---------------|------------------------------------------------------------------------------------|--|
| deltat        | = 5.000e-04                                                                        |  |
| echot         | = 288.00                                                                           |  |
| filbas        | = '/home/stu11733/.lcmodel/<br>basis-sets/gamma_press_te288_128<br>mhz_662d.basis' |  |
| hzpppm        | = 1.2776e+02                                                                       |  |

Row#8 Col#5 MR Hirn (2018.11.14 09:25:43) Subject 14 8.00e-01 mL, TE/TR/NS=288/1500/1 (s2DSI\_TE288 TR1500)

Data of: *Sektion Biomedizinische Bildgebung, Christian-Albrechts-Universitaet zu Kiel*

LCModel (Version 6.3-1J) Copyright: S.W. Provencher.      Ref.: Magn. Reson. Med. 30:672-679 (1993).

28-November-2019 14:47

|                                                                                                                                                                                                                                                                                                                                                                                                                                                                                                                                                                                                                                                                                                                                                                                                                                                                                                                                                                                                                                                                                                                                                                                                                                                                                                                                                                                                                                                                                                                                                                                                                                                                                                                                                                                                                                                                                                                                                                                                                                                                                                             |
|-------------------------------------------------------------------------------------------------------------------------------------------------------------------------------------------------------------------------------------------------------------------------------------------------------------------------------------------------------------------------------------------------------------------------------------------------------------------------------------------------------------------------------------------------------------------------------------------------------------------------------------------------------------------------------------------------------------------------------------------------------------------------------------------------------------------------------------------------------------------------------------------------------------------------------------------------------------------------------------------------------------------------------------------------------------------------------------------------------------------------------------------------------------------------------------------------------------------------------------------------------------------------------------------------------------------------------------------------------------------------------------------------------------------------------------------------------------------------------------------------------------------------------------------------------------------------------------------------------------------------------------------------------------------------------------------------------------------------------------------------------------------------------------------------------------------------------------------------------------------------------------------------------------------------------------------------------------------------------------------------------------------------------------------------------------------------------------------------------------|
| <div><div><div><div><div>Conc.</div><div>%SD</div><div>/GPC+PC</div><div>Metabolite</div></div><div><div>64.102</div><div>35%</div><div>0.000</div><div>Ala</div></div><div><div>0.000</div><div>999%</div><div>0.000</div><div>Cr</div></div><div><div>18.465</div><div>80%</div><div>0.000</div><div>PCr</div></div><div><div>13.452</div><div>305%</div><div>0.000</div><div>Gln</div></div><div><div>0.000</div><div>999%</div><div>0.000</div><div>Glu</div></div><div><div>0.000</div><div>999%</div><div>0.000</div><div>GPC</div></div><div><div>0.000</div><div>999%</div><div>0.000</div><div>PCh</div></div><div><div>0.000</div><div>999%</div><div>0.000</div><div>GSH</div></div><div><div>0.000</div><div>999%</div><div>0.000</div><div>Ins</div></div><div><div>161.596</div><div>16%</div><div>0.000</div><div>Lac</div></div><div><div>22.447</div><div>61%</div><div>0.000</div><div>NAA</div></div><div><div>3.367</div><div>61%</div><div>0.000</div><div>NAAG</div></div><div><div>0.443</div><div>64%</div><div>0.000</div><div>Scyllo</div></div><div><div>2.213</div><div>64%</div><div>0.000</div><div>Tau</div></div><div><div>1.846</div><div>81%</div><div>0.000</div><div>-CrCH2</div></div><div><div>0.000</div><div>999%</div><div>0.000</div><div>GPC+PCh</div></div><div><div>25.814</div><div>61%</div><div>0.000</div><div>NAA+NAAG</div></div><div><div>18.465</div><div>80%</div><div>0.000</div><div>Cr+PCr</div></div><div><div>13.452</div><div>305%</div><div>0.000</div><div>Glu+Gln</div></div></div></div></div> <div><div>hzpppm= 1.2776e+02</div><div>icolen= 7</div><div>icolst= 5</div><div>irowen= 8</div><div>irowst= 8</div><div>islice= 1</div><div>lps= 8</div><div>ltable= 7</div><div>ndcols= 16</div><div>ndrows= 20</div><div>ndslic= 1</div><div>nunfil= 1024</div><div>ppmend= 1.0</div><div>ppmst= 4.0</div><div>savdir= '/home/stu111733/.lcmodel/saved/MR_Hirn/s14/2018.11.14_09:25:43/'</div><div>sptype= 'tumor'</div><div>srcraw= '/home/data/Studies/GBM_Spektrum/data/s14/spectro01/spectro01_8_1_raw_act.SD</div><div>AT'</div></div> |
|-------------------------------------------------------------------------------------------------------------------------------------------------------------------------------------------------------------------------------------------------------------------------------------------------------------------------------------------------------------------------------------------------------------------------------------------------------------------------------------------------------------------------------------------------------------------------------------------------------------------------------------------------------------------------------------------------------------------------------------------------------------------------------------------------------------------------------------------------------------------------------------------------------------------------------------------------------------------------------------------------------------------------------------------------------------------------------------------------------------------------------------------------------------------------------------------------------------------------------------------------------------------------------------------------------------------------------------------------------------------------------------------------------------------------------------------------------------------------------------------------------------------------------------------------------------------------------------------------------------------------------------------------------------------------------------------------------------------------------------------------------------------------------------------------------------------------------------------------------------------------------------------------------------------------------------------------------------------------------------------------------------------------------------------------------------------------------------------------------------|
