# Supplementary material for: Intratumoral Distribution of Lactate and the Monocarboxylate Transporters 1 and 4 in Human Glioblastoma Multiforme and Their Relationships to Tumor Progression-Associated Markers
Source: MDPI journal article supplement (doi:10.3390/ijms21176254), 2020-08-29
Supplement: s1 [file s1]

Lactate concentration (millimole = mM) in the contrast enhancing part of the tumor ("tumor"), the edema without contrast enhancement ("edema"), the normal appearing white matter ("NAWM") and the contralateral hemisphere ("contralateral site")

| symbol of probe (P) | tumor                |                            |                         |                                    |                            | edema                   |                            |                         |                                    |                            | NAWM                    |                            |                            |                                    |                            | contralateral site     |                            |                         |                                    |                            |
|---------------------|----------------------|----------------------------|-------------------------|------------------------------------|----------------------------|-------------------------|----------------------------|-------------------------|------------------------------------|----------------------------|-------------------------|----------------------------|----------------------------|------------------------------------|----------------------------|------------------------|----------------------------|-------------------------|------------------------------------|----------------------------|
|                     | voxel                | lactate concentration (mM) | standard deviation      | average lactate concentration (mM) | average standard deviation | voxel                   | lactate concentration (mM) | standard deviation      | average lactate concentration (mM) | average standard deviation | voxel                   | lactate concentration (mM) | standard deviation         | average lactate concentration (mM) | average standard deviation | voxel                  | lactate concentration (mM) | standard deviation      | average lactate concentration (mM) | average standard deviation |
| P11                 | 12;12                | 107.00                     | 23.00                   | 107.00                             | 23.00                      | 13;10<br>10;11<br>10;12 | 27.00<br>51.00<br>39.00    | 61.00<br>48.00<br>50.00 | 39.00                              | 53.00                      | 10;13<br>14;11<br>14;12 | 0.00<br>16.00<br>0.00      | 999.00<br>101.00<br>999.00 | 5.33                               | 699.67                     | 13;5<br>14;5           | 1.00<br>0.00               | 999.00<br>999.00        | 0.50                               | 999.00                     |
| P12                 | 18;8<br>19;7<br>19;8 | 110.00<br>133.00<br>152.00 | 26.00<br>26.00<br>18.00 | 131.67                             | 23.33                      | 19;10                   | 65.00                      | 22.00                   | 65.00                              | 22.00                      | 17;8<br>18;6<br>20;10   | 17.00<br>0.00<br>0.00      | 110.00<br>999.00<br>999.00 | 5.67                               | 702.67                     | 19;13                  | 0.00                       | 999.00                  | 0.00                               | 999.00                     |
| P15                 | 10;4<br>11;4<br>11;5 | 200.00<br>134.00<br>164.00 | 13.00<br>15.00<br>16.00 | 166.00                             | 14.67                      | 9;3<br>11;3<br>13;5     | 84.00<br>88.00<br>58.00    | 29.00<br>23.00<br>28.00 | 76.67                              | 26.67                      | 5;4<br>5;5<br>6;3       | 3.00<br>15.00<br>0.00      | 374.00<br>178.00<br>999.00 | 6.00                               | 517.00                     | 4;10                   | 0.00                       | 999.00                  | 0.00                               | 999.00                     |
| P17                 | 10;7<br>12;7<br>12;8 | 151.00<br>152.00<br>110.00 | 10.00<br>8.00<br>8.00   | 137.67                             | 8.67                       | 10;10<br>7;10<br>8;9    | 62.00<br>59.00<br>64.00    | 12.00<br>16.00<br>15.00 | 61.67                              | 14.33                      | 5;7<br>5;9<br>6;7       | 30.00<br>0.00<br>5.00      | 75.00<br>999.00<br>445.00  | 11.67                              | 506.33                     | 11;3<br>12;3           | 0.00<br>0.00               | 999.00<br>999.00        | 0.00                               | 999.00                     |
| P30                 | 11;4<br>12;4<br>12;6 | 16.00<br>11.00<br>9.00     | 4.00<br>21.00<br>7.00   | 12.00                              | 4.00                       | 14;4<br>13;6            | 5.00<br>3.00               | 10.00<br>20.00          | 4.00                               | 15.00                      | 7;6<br>7;7<br>15;5      | 0.00<br>2.00<br>1.00       | 999.00<br>44.00<br>74.00   | 1.00                               | 521.50                     | 8;12<br>10;12<br>11;12 | 1.00<br>1.00<br>1.00       | 80.00<br>75.00<br>71.00 | 1.00                               | 77.50                      |
| P42                 | 14;6<br>16;7<br>16;8 | 6.00<br>6.00<br>7.00       | 11.00<br>6.00<br>12.00  | 6.33                               | 9.67                       | 13;6<br>13;7            | 4.00<br>3.00               | 18.00<br>27.00          | 3.50                               | 22.50                      | 10;6<br>11;4<br>11;8    | 0.00<br>0.00<br>1.00       | 999.00<br>999.00<br>37.00  | 0.33                               | 678.33                     | 12;11<br>12;12         | 0.00<br>0.00               | 999.00<br>999.00        | 0.00                               | 999.00                     |
| P43                 | 13;13<br>14;11       | 117.00<br>104.00           | 14.00<br>10.00          | 110.50                             | 12.00                      | 11;10<br>11;11          | 66.00<br>62.00             | 17.00<br>16.00          | 64.00                              | 16.50                      | 11;9<br>15;9            | 18.00<br>0.00              | 62.00<br>999.00            | 9.00                               | 530.50                     | 12;6<br>12;7           | 0.00<br>0.00               | 999.00<br>999.00        | 0.00                               | 999.00                     |
| P44                 | 11;5<br>12;5<br>12;6 | 345.00<br>430.00<br>155.00 | 7.00<br>24.00<br>18.00  | 310.00                             | 16.33                      | 8;5<br>12;7<br>13;5     | 161.00<br>144.00<br>243.00 | 16.00<br>24.00<br>18.00 | 182.67                             | 19.33                      | 8;7<br>13;7             | 24.00<br>12.00             | 116.00<br>228.00           | 18.00                              | 172.00                     | 9;11                   | 0.00                       | 999.00                  | 0.00                               | 999.00                     |

Relative lactate amount in the contrast enhancing part of the tumor ("tumor") and the edema without contrast enhancement ("edema")

normal appearing white matter = 1

| symbol of probe (P) | tumor  | edema  |
|---------------------|--------|--------|
| P11                 | 20.075 | 7.317  |
| P12                 | 23.222 | 11.464 |
| P15                 | 27.667 | 12.778 |
| P17                 | 11.797 | 5.284  |
| P30                 | 12.000 | 4.000  |
| P42                 | 19.182 | 10.606 |
| P43                 | 12.278 | 7.111  |
| P44                 | 17.222 | 10.148 |

Depending on the size of the tumor, up to 3 different voxel were included in the calculation
