# Supplementary material for: Intratumoral Distribution of Lactate and the Monocarboxylate Transporters 1 and 4 in Human Glioblastoma Multiforme and Their Relationships to Tumor Progression-Associated Markers
Source: MDPI journal article supplement (doi:10.3390/ijms21176254), 2020-08-29
Supplement: s1 [file s1]

**Correlation of the relative gene expression of MCT1 and MCT4 with the different EMT, stemness and dormancy markers**

| MCT1          | MCT4   | vimentin | GFAP   | $\beta$ -catenin | KLF4   | OCT4  | Sox2  | EPHA5  | H2BK   | IGFBP5 |
|---------------|--------|----------|--------|------------------|--------|-------|-------|--------|--------|--------|
| center + edge | -0.099 | -0.158   | -0.248 | -0.002           | -0.256 | 0.105 | 0.209 | -0.046 | -0.046 | -0.221 |
| center        | -0.240 | 0.040    | 0.004  | 0.204            | -0.283 | 0.197 | 0.224 | 0.044  | -0.036 | -0.111 |
| edge          | -0.028 | -0.288   | -0.281 | 0.022            | -0.194 | 0.150 | 0.190 | -0.093 | -0.123 | -0.201 |

| MCT4          | MCT1  | vimentin | GFAP  | $\beta$ -catenin | KLF4   | OCT4   | Sox2   | EPHA5  | H2BK  | IGFBP5 |
|---------------|-------|----------|-------|------------------|--------|--------|--------|--------|-------|--------|
| center + edge | 0.419 | -0.142   | 0.040 | -0.074           | -0.211 | -0.158 | 0.060  | -0.123 | 0.248 | 0.213  |
| center        | 0.526 | -0.080   | 0.083 | -0.072           | -0.493 | -0.157 | 0.210  | -0.239 | 0.421 | 0.375  |
| edge          | 0.357 | -0.140   | 0.116 | -0.015           | 0.073  | -0.185 | -0.147 | 0.045  | 0.367 | 0.338  |

**Correlation of the relative gene expression of MCT1, MCT4 and the different EMT, stemness and dormancy markers with the lactate concentration evaluated by lactate-ELISA**

| MCT1          | MCT1  | MCT4   | vimentin | GFAP   | $\beta$ -catenin | KLF4   | OCT4   | Sox2   | EPHA5  | H2BK   | IGFBP5 |
|---------------|-------|--------|----------|--------|------------------|--------|--------|--------|--------|--------|--------|
| center + edge | 0.784 | 0.152  | -0.252   | -0.587 | -0.490           | -0.531 | -0.416 | 0.196  | -0.129 | -0.007 | -0.448 |
| center        | 0.673 | 0.018  | -0.132   | -0.078 | -0.114           | -0.324 | 0.031  | 0.512  | 0.125  | -0.237 | 0.265  |
| edge          | 0.732 | -0.256 | -0.464   | -0.706 | -0.600           | -0.566 | -0.758 | -0.302 | 0.111  | -0.076 | -0.639 |
| t-value       | 6.437 |        |          | -3.693 |                  |        |        |        |        |        |        |
| p-value       | 0.000 |        |          | 0.001  |                  |        |        |        |        |        |        |
