# Supplementary material for: Intratumoral Distribution of Lactate and the Monocarboxylate Transporters 1 and 4 in Human Glioblastoma Multiforme and Their Relationships to Tumor Progression-Associated Markers
Source: MDPI journal article supplement (doi:10.3390/ijms21176254), 2020-08-29
Supplement: s1 [file s1]

| Symbol of probe (P) | MCT1        |                       |        | MCT4        |                       |        | Vimentin    |                       |        | GFAP        |         |        | E-Catenin   |                       |        | KLF4        |                       |        | Oct4        |                       |        | Sox2        |                       |        | EphA5       |                       |        | H2BK        |                       |        | IGFBP5      |                       |        |
|---------------------|-------------|-----------------------|--------|-------------|-----------------------|--------|-------------|-----------------------|--------|-------------|---------|--------|-------------|-----------------------|--------|-------------|-----------------------|--------|-------------|-----------------------|--------|-------------|-----------------------|--------|-------------|-----------------------|--------|-------------|-----------------------|--------|-------------|-----------------------|--------|
|                     | $\Delta Ct$ | 2 <sup>Δ- (ΔCt)</sup> | n-fold | $\Delta Ct$ | 2 <sup>Δ- (ΔCt)</sup> | n-fold | $\Delta Ct$ | 2 <sup>Δ- (ΔCt)</sup> | n-fold | $\Delta Ct$ | Sym     | n-fold | $\Delta Ct$ | 2 <sup>Δ- (ΔCt)</sup> | n-fold | $\Delta Ct$ | 2 <sup>Δ- (ΔCt)</sup> | n-fold | $\Delta Ct$ | 2 <sup>Δ- (ΔCt)</sup> | n-fold | $\Delta Ct$ | 2 <sup>Δ- (ΔCt)</sup> | n-fold | $\Delta Ct$ | 2 <sup>Δ- (ΔCt)</sup> | n-fold | $\Delta Ct$ | 2 <sup>Δ- (ΔCt)</sup> | n-fold | $\Delta Ct$ | 2 <sup>Δ- (ΔCt)</sup> | n-fold |
| P04 - center        | 1.845       | 0.278                 | 0.665  | 4.708       | 0.038                 | 0.360  | -3.691      | 12.914                | 0.209  | -3.139      | 8.808   | 3.000  | 3.313       | 0.101                 | 0.764  | 7.180       | 0.007                 | 0.868  | 5.620       | 0.020                 | 0.894  | 5.480       | 0.022                 | 6.174  | 6.342       | 0.012                 | 17.914 | 1.816       | 0.284                 | 0.169  | -0.705      | 1.630                 | 0.201  |
| P04 - edge          | 2.435       | 0.185                 |        | 6.181       | 0.014                 |        | -1.430      | 2.694                 |        | -4.724      | 26.428  |        | 3.702       | 0.077                 |        | 7.384       | 0.006                 |        | 5.781       | 0.018                 |        | 2.854       | 0.138                 |        | 2.179       | 0.221                 |        | 4.379       | 0.048                 |        | 1.607       | 0.328                 |        |
| P07 - center        | 1.458       | 0.364                 | 0.319  | 5.866       | 0.017                 | 2.477  | -3.524      | 11.501                | 1.441  | -6.053      | 66.383  | 3.338  | 4.156       | 0.056                 | 3.516  | 5.493       | 0.022                 | 4.862  | 6.171       | 0.014                 | 1.968  | 1.453       | 0.365                 | 1.065  | 4.937       | 0.033                 | 0.867  | 3.925       | 0.066                 | 0.440  | 0.251       | 0.840                 | 2.138  |
| P07 - edge          | 3.107       | 0.116                 |        | 4.558       | 0.042                 |        | -4.051      | 16.579                |        | -7.792      | 221.590 |        | 2.342       | 0.197                 |        | 3.211       | 0.108                 |        | 5.195       | 0.027                 |        | 1.362       | 0.389                 |        | 5.144       | 0.028                 |        | 5.109       | 0.029                 |        | -0.845      | 1.797                 |        |
| P11 - center        | 0.892       | 0.539                 | 0.705  | 3.356       | 0.098                 | 0.631  | -4.835      | 28.534                | 0.717  | -5.040      | 32.905  | 0.455  | 2.690       | 0.155                 | 1.054  | 5.791       | 0.018                 | 0.901  | 5.293       | 0.026                 | 0.899  | 1.776       | 0.292                 | 1.006  | 4.441       | 0.046                 | 0.896  | 4.429       | 0.046                 | 0.873  | -0.156      | 1.114                 | 1.142  |
| P11 - edge          | 1.397       | 0.380                 |        | 4.020       | 0.062                 |        | -4.355      | 20.466                |        | -3.904      | 14.967  |        | 2.614       | 0.163                 |        | 5.942       | 0.016                 |        | 5.446       | 0.023                 |        | 1.768       | 0.294                 |        | 4.599       | 0.041                 |        | 4.625       | 0.041                 |        | -0.348      | 1.273                 |        |
| P15 - center        | 0.989       | 0.504                 | 1.168  | 3.436       | 0.092                 | 0.597  | -3.575      | 11.916                | 0.213  | -5.294      | 39.238  | 3.256  | 2.112       | 0.231                 | 2.030  | 5.790       | 0.018                 | 2.948  | 5.149       | 0.028                 | 0.959  | 0.391       | 0.763                 | 0.915  | 4.147       | 0.056                 | 1.048  | 3.830       | 0.070                 | 0.938  | -0.954      | 1.937                 | 0.660  |
| P15 - edge          | 0.765       | 0.588                 |        | 4.180       | 0.055                 |        | -1.342      | 2.535                 |        | -6.997      | 127.755 |        | 1.090       | 0.470                 |        | 4.231       | 0.053                 |        | 5.210       | 0.027                 |        | 0.519       | 0.698                 |        | 4.080       | 0.059                 |        | 3.923       | 0.066                 |        | -0.355      | 1.279                 |        |
| P16 - center        | 1.920       | 0.264                 | 0.475  | 2.714       | 0.152                 | 0.928  | -2.845      | 7.186                 | 1.624  | 0.111       | 0.926   | 3.555  | 3.707       | 0.077                 | 1.270  | 4.112       | 0.058                 | 2.526  | 5.279       | 0.026                 | 1.625  | 2.791       | 0.144                 | 0.823  | 1.706       | 0.306                 | 0.611  | 4.356       | 0.049                 | 2.104  | 0.743       | 0.597                 | 1.419  |
| P16 - edge          | 2.993       | 0.126                 |        | 2.822       | 0.141                 |        | -3.545      | 11.673                |        | -1.719      | 3.291   |        | 3.362       | 0.097                 |        | 2.775       | 2 <sup>Δ- (ΔCt)</sup> |        | 4.579       | 0.042                 |        | 3.073       | 0.119                 |        | 2.418       | 0.187                 |        | 3.283       | 0.103                 |        | 0.238       | 0.848                 |        |
| P19 - center        | 3.561       | 0.085                 | 1.022  | 3.479       | 0.090                 | 1.244  | -3.514      | 11.427                | 1.046  | -5.689      | 51.601  | 2.528  | 3.574       | 0.084                 | 2.505  | 4.256       | 0.052                 | 0.721  | 6.298       | 0.013                 | 1.155  | 1.395       | 0.380                 | 1.042  | 7.138       | 0.007                 | 1.259  | 4.157       | 0.056                 | 1.553  | -1.451      | 2.735                 | 0.472  |
| P19 - edge          | 3.530       | 0.087                 |        | 3.163       | 0.112                 |        | -3.580      | 11.956                |        | -7.028      | 130.473 |        | 2.249       | 0.210                 |        | 4.728       | 0.038                 |        | 6.090       | 0.015                 |        | 1.335       | 0.396                 |        | 6.806       | 0.009                 |        | 3.521       | 0.087                 |        | -0.369      | 1.291                 |        |
| P23 - center        | 1.512       | 0.351                 | 0.366  | 3.233       | 0.106                 | 0.883  | -4.814      | 28.124                | 0.416  | -5.820      | 56.475  | 5.185  | 2.390       | 0.191                 | 2.350  | 6.469       | 0.011                 | 10.244 | 4.980       | 0.032                 | 0.964  | 0.597       | 0.661                 | 0.637  | 4.518       | 0.044                 | 0.609  | 3.115       | 0.115                 | 1.245  | -2.026      | 4.074                 | 3.538  |
| P23 - edge          | 2.961       | 0.128                 |        | 3.412       | 0.094                 |        | -3.550      | 11.709                |        | -8.194      | 292.807 |        | 1.158       | 0.448                 |        | 3.112       | 0.116                 |        | 5.034       | 0.031                 |        | 1.248       | 0.421                 |        | 5.235       | 0.027                 |        | 2.799       | 0.144                 |        | -3.849      | 14.412                |        |
| P24 - center        | 2.506       | 0.176                 | 0.608  | 4.257       | 0.052                 | 1.987  | -3.777      | 13.708                | 1.995  | -5.605      | 48.681  | 1.332  | 1.708       | 0.306                 | 0.730  | 4.978       | 0.032                 | 1.174  | 5.366       | 0.024                 | 0.875  | 1.717       | 0.304                 | 0.754  | 4.721       | 0.038                 | 0.541  | 3.356       | 0.098                 | 0.563  | 0.238       | 0.848                 | 4.600  |
| P24 - edge          | 3.224       | 0.107                 |        | 3.266       | 0.104                 |        | -4.773      | 27.341                |        | -6.018      | 64.821  |        | 2.162       | 0.223                 |        | 4.746       | 0.037                 |        | 5.558       | 0.021                 |        | 2.125       | 0.229                 |        | 5.607       | 0.021                 |        | 4.184       | 0.055                 |        | -1.963      | 3.900                 |        |
| P26 - center        | 2.015       | 0.247                 | 0.935  | 6.183       | 0.014                 | 0.683  | -3.238      | 9.432                 | 0.888  | -4.236      | 18.839  | 0.844  | 3.828       | 0.070                 | 0.781  | 5.473       | 0.023                 | 1.169  | 4.491       | 0.044                 | 1.421  | 2.337       | 0.198                 | 0.963  | 6.344       | 0.012                 | 1.405  | 5.785       | 0.018                 | 0.980  | 1.734       | 0.301                 | 0.675  |
| P26 - edge          | 2.112       | 0.231                 |        | 6.733       | 0.009                 |        | -3.066      | 8.372                 |        | -3.992      | 15.909  |        | 4.184       | 0.055                 |        | 5.248       | 0.026                 |        | 3.985       | 0.063                 |        | 2.391       | 0.191                 |        | 5.853       | 0.017                 |        | 5.813       | 0.018                 |        | 2.301       | 0.203                 |        |
| P27 - center        | 1.928       | 0.263                 | 1.118  | 5.575       | 0.021                 | 1.644  | -1.689      | 3.225                 | 1.021  | -4.032      | 16.354  | 0.999  | 4.002       | 0.062                 | 1.213  | 6.379       | 0.012                 | 0.936  | 4.170       | 0.056                 | 1.296  | 2.174       | 0.222                 | 0.842  | 5.222       | 0.027                 | 1.077  | 2.678       | 0.156                 | 1.256  | 1.535       | 0.345                 | 0.771  |
| P27 - edge          | 1.767       | 0.294                 |        | 4.857       | 0.035                 |        | -1.719      | 3.292                 |        | -4.090      | 16.333  |        | 3.723       | 0.076                 |        | 6.474       | 0.011                 |        | 3.797       | 0.072                 |        | 2.422       | 0.187                 |        | 5.114       | 0.029                 |        | 2.350       | 0.196                 |        | 1.910       | 0.266                 |        |
| P30 - center        | 2.208       | 0.216                 | 1.287  | 2.883       | 0.136                 | 0.766  | -3.496      | 11.283                | 1.292  | -3.108      | 8.624   | 0.519  | 3.555       | 0.085                 | 1.071  | 8.381       | 0.003                 | 0.424  | 5.954       | 0.016                 | 0.648  | 0.902       | 0.535                 | 0.613  | 4.605       | 0.041                 | 1.974  | 3.970       | 0.064                 | 1.374  | 1.049       | 0.483                 | 1.585  |
| P30 - edge          | 1.843       | 0.279                 |        | 3.267       | 0.104                 |        | -3.866      | 14.583                |        | -2.161      | 4.473   |        | 3.456       | 0.091                 |        | 9.618       | 0.001                 |        | 6.579       | 0.010                 |        | 1.607       | 0.328                 |        | 3.623       | 0.081                 |        | 3.512       | 0.088                 |        | 0.384       | 0.766                 |        |
| P36 - center        | 2.020       | 0.247                 | 0.990  | 2.180       | 0.221                 | 0.224  | -3.051      | 8.285                 | 0.680  | -1.659      | 3.158   | 2.247  | 2.815       | 0.142                 | 0.802  | 8.890       | 0.002                 | 1.717  | 7.542       | 0.005                 | 2.089  | 2.911       | 0.133                 | 2.375  | 6.544       | 0.011                 | 4.981  | 3.592       | 0.083                 | 1.038  | -1.004      | 2.005                 | 0.236  |
| P36 - edge          | 2.034       | 0.244                 |        | 4.337       | 0.049                 |        | -2.494      | 5.633                 |        | -2.827      | 7.095   |        | 3.133       | 0.114                 |        | 8.110       | 0.004                 |        | 6.480       | 0.011                 |        | 1.663       | 0.316                 |        | 4.227       | 0.053                 |        | 3.538       | 0.086                 |        | 1.081       | 0.473                 |        |
| P21 - center        | 1.634       | 0.322                 | 0.766  | 4.512       | 0.044                 | 0.654  | -4.195      | 18.317                | 1.428  | -7.975      | 251.631 | 1.452  | 1.785       | 0.290                 | 1.222  | 4.366       | 0.048                 | 4.537  | 4.947       | 0.032                 | 1.012  | -0.840      | 1.790                 | 0.823  | 3.742       | 0.075                 | 1.312  | 4.698       | 0.039                 | 0.897  | -2.040      | 4.113                 | 1.769  |
| P21 - edge          | 2.019       | 0.247                 |        | 5.124       | 0.029                 |        | -4.709      | 26.150                |        | -8.514      | 365.472 |        | 1.496       | 0.355                 |        | 2.184       | 0.220                 |        | 4.929       | 0.033                 |        | -0.559      | 1.474                 |        | 3.350       | 0.098                 |        | 4.855       | 0.035                 |        | -2.863      | 7.275                 |        |
| P34 - center        | 2.653       | 0.159                 | 0.419  | 1.898       | 0.268                 | 0.258  | -5.564      | 47.306                | 1.117  | -6.573      | 95.197  | 3.101  | 2.353       | 0.196                 | 3.167  | 5.593       | 0.021                 | 1.018  | 5.512       | 0.022                 | 1.776  | 1.661       | 0.316                 | 1.664  | 4.803       | 0.036                 | 1.583  | 4.228       | 0.053                 | 1.552  | -2.120      | 4.348                 | 2.295  |
| P34 - edge          | 3.907       | 0.067                 |        | 3.850       | 0.069                 |        | -5.724      | 52.848                |        | -8.206      | 295.193 |        | 0.690       | 0.620                 |        | 5.567       | 0.021                 |        | 4.683       | 0.039                 |        | 0.926       | 0.526                 |        | 4.140       | 0.057                 |        | 3.595       | 0.083                 |        | -3.319      | 9.978                 |        |
| P35 - center        | 1.342       | 0.394                 | 0.962  | 4.081       | 0.059                 | 3.410  | -3.293      | 9.801                 | 3.409  | -3.246      | 9.488   | 5.266  | 2.152       | 0.225                 | 1.191  | 7.527       | 0.005                 | 3.517  | 4.922       | 0.033                 | 1.920  | 1.169       | 0.445                 | 0.802  | 7.090       | 0.007                 | 1.601  | 3.549       | 0.085                 | 0.326  | -0.013      | 1.009                 | 9.677  |
| P35 - edge          | 1.397       | 0.380                 |        | 2.311       | 0.202                 |        | -5.062      | 33.412                |        | -5.643      | 49.964  |        | 1.900       | 0.268                 |        | 5.712       | 0.019                 |        | 3.981       | 0.063                 |        | 1.487       | 0.357                 |        | 6.411       | 0.012                 |        | 5.168       | 0.028                 |        | -3.288      | 9.765                 |        |
